# Supplementary material for: The level of putative carotenoid-binding proteins determines the body color in two species of endemic Lake Baikal amphipods
Source: PubMed Central journal article supplement (PMC7307558; doi:10.7717/peerj.9387), 2020-06-19

**A**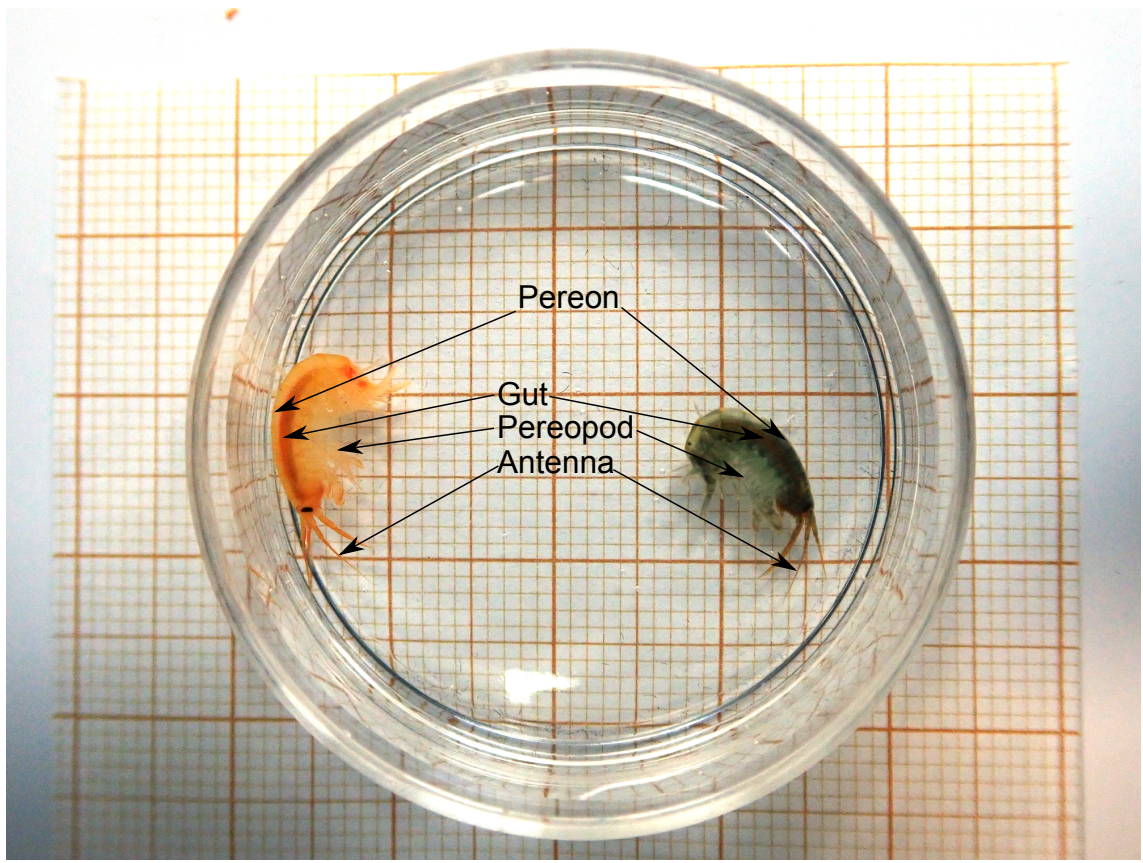**B**

Gut R/B color index

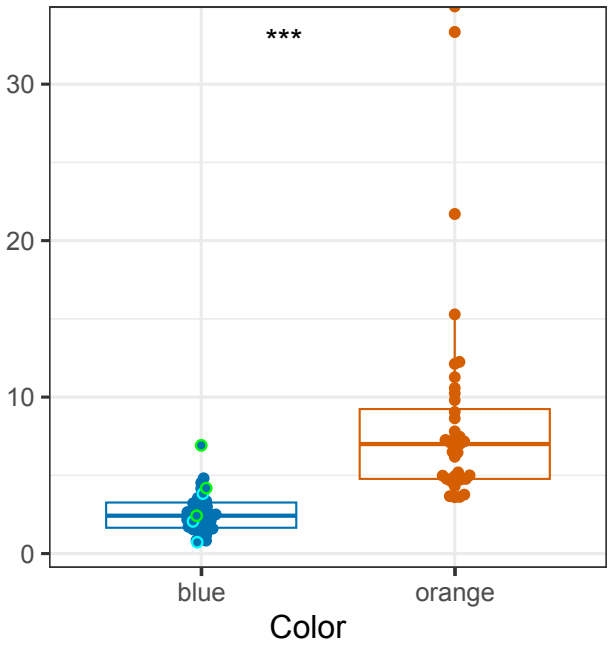**C**

Pereopod R/B color index

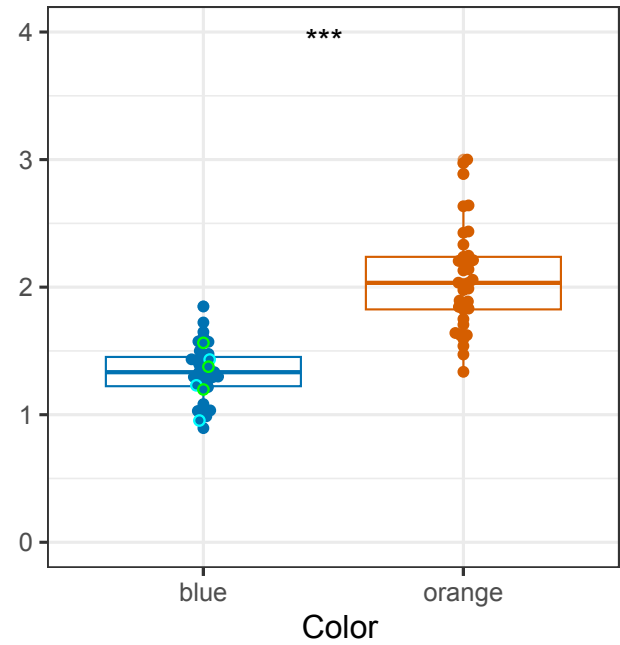

Supplement: peerj-08-9387-s002.pdf [file peerj-08-9387-s002.pdf]
