# Supplementary material for: The level of putative carotenoid-binding proteins determines the body color in two species of endemic Lake Baikal amphipods
Source: PubMed Central journal article supplement (PMC7307558; doi:10.7717/peerj.9387), 2020-06-19

***E. cyaneus***

2DE\_1 (orange)

2DE\_2 (blue)

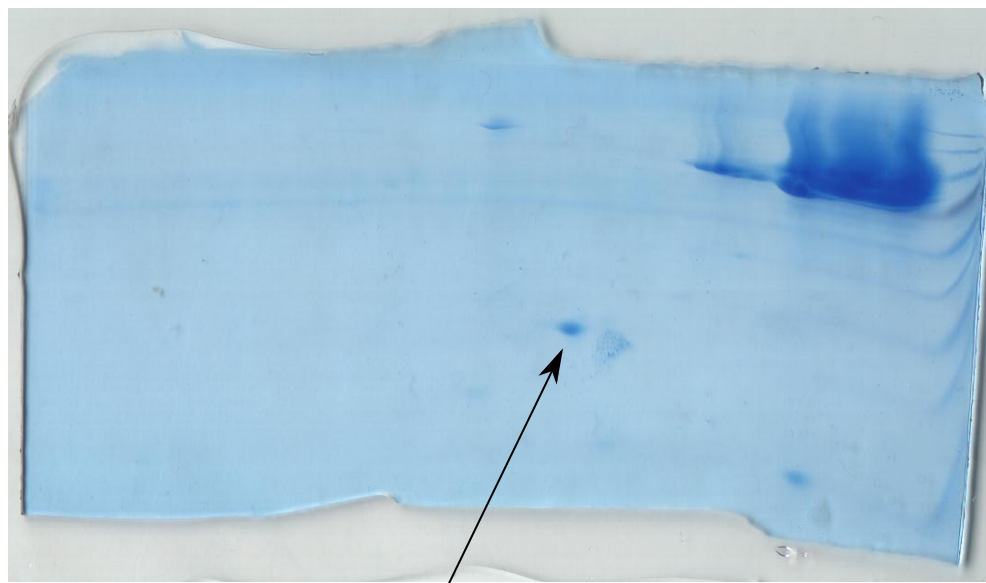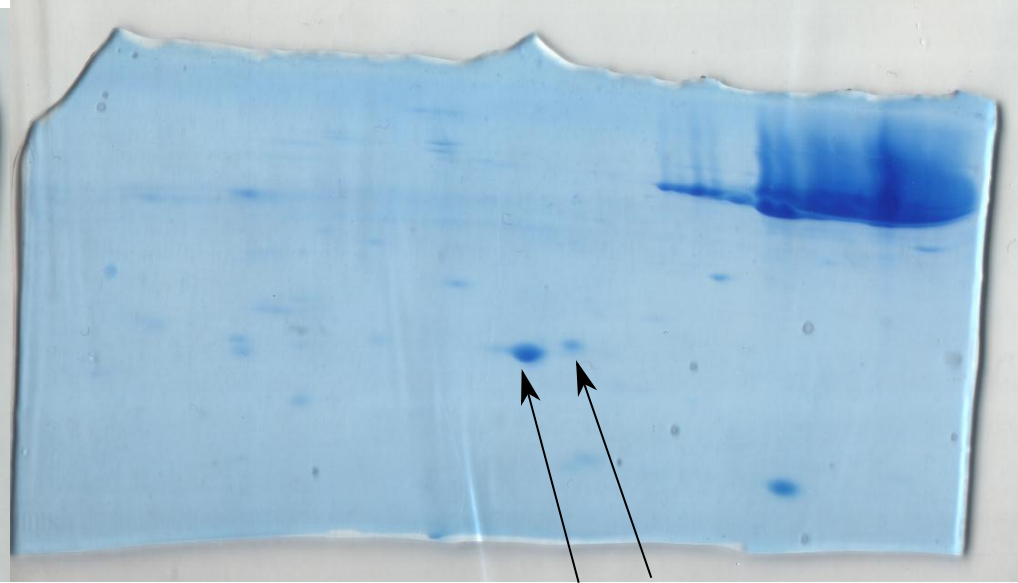

pI 3

2DE\_1.27kD\_a

pI 3

2DE\_1.27kD\_a / b

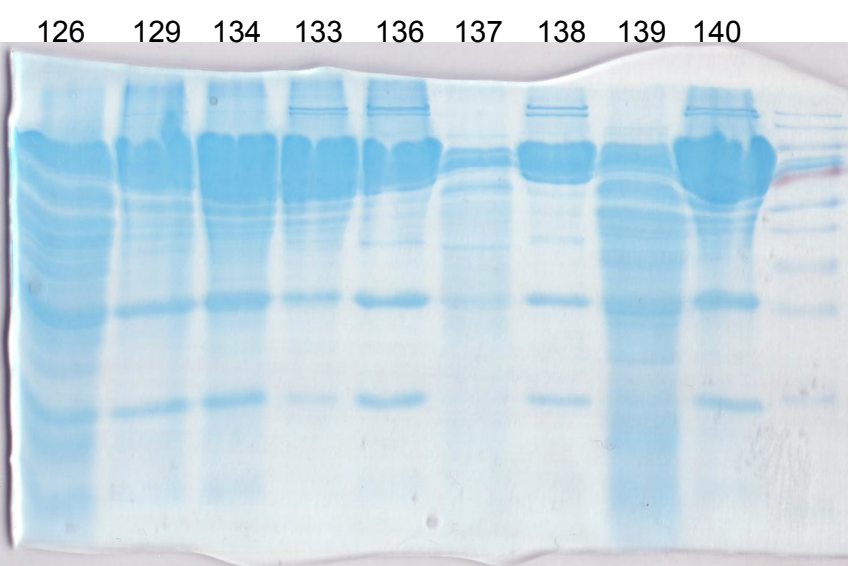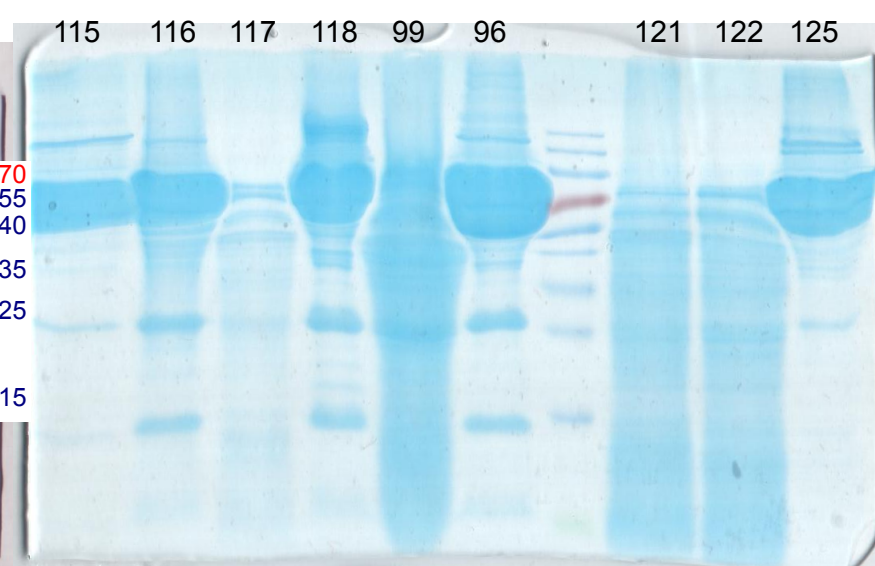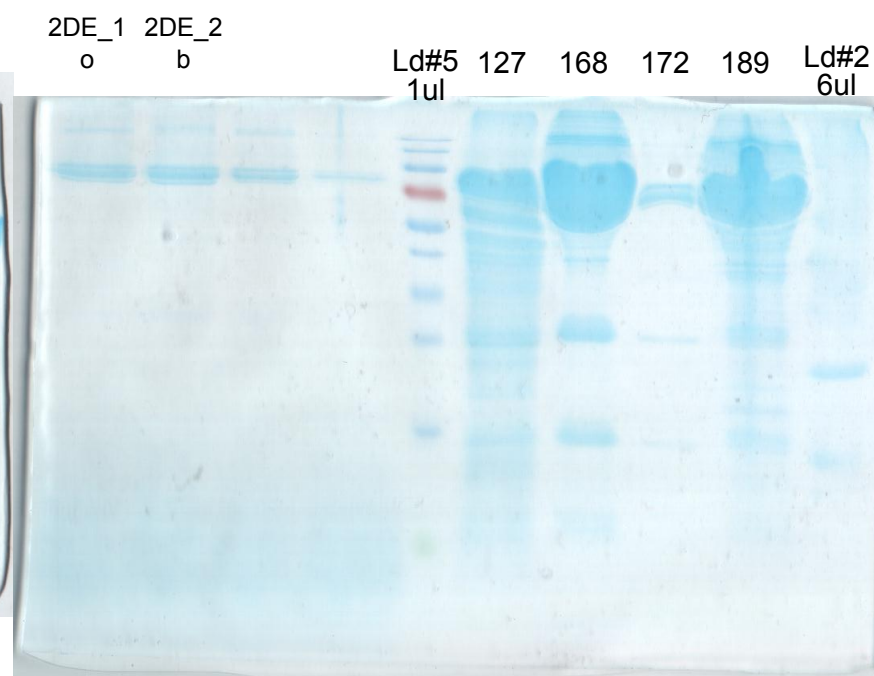

***E. vittatus***

Teal

Yellow

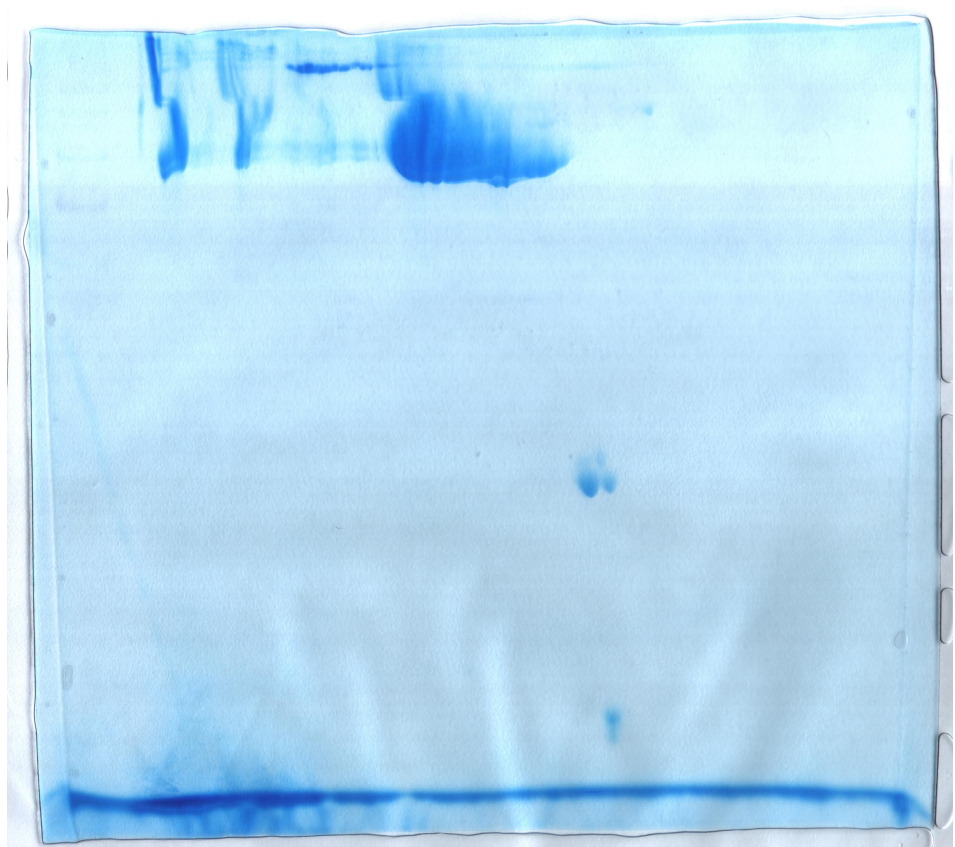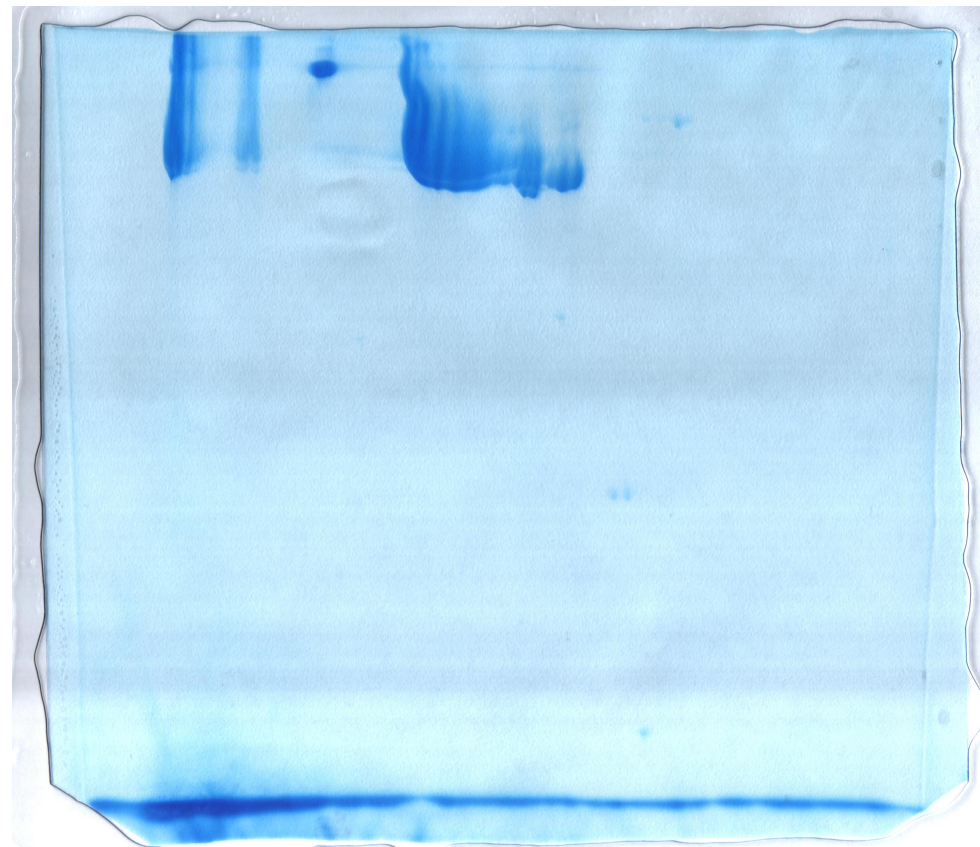

Supplement: peerj-08-9387-s003.pdf [file peerj-08-9387-s003.pdf]
