# Supplementary material for: The level of putative carotenoid-binding proteins determines the body color in two species of endemic Lake Baikal amphipods
Source: PubMed Central journal article supplement (PMC7307558; doi:10.7717/peerj.9387), 2020-06-19

**A**

Correlation coefficient = 0.96

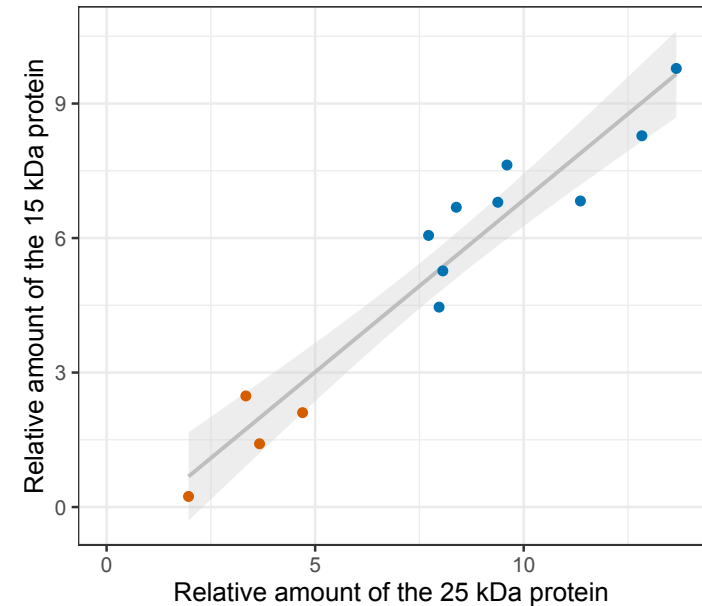**B**

Correlation coefficient = 0.97

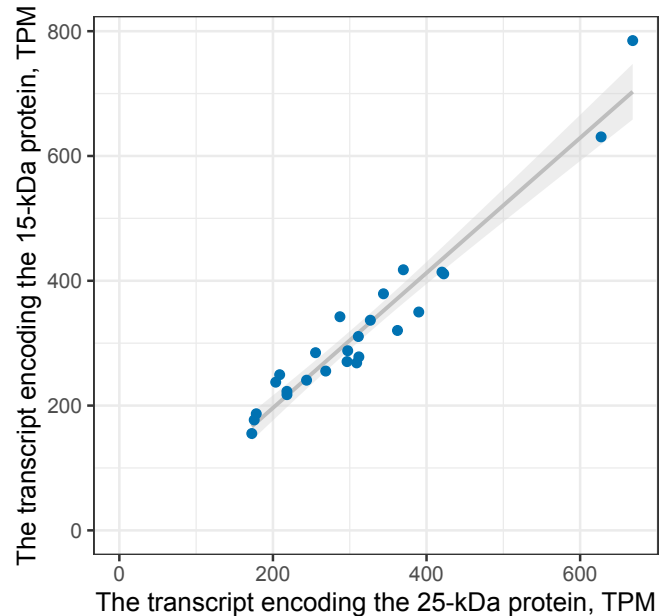

Supplement: peerj-08-9387-s004.pdf [file peerj-08-9387-s004.pdf]
