# Supplementary material for: The level of putative carotenoid-binding proteins determines the body color in two species of endemic Lake Baikal amphipods
Source: PeerJ. 2020 Jun 19;8:e9387. doi: 10.7717/peerj.9387 (PMC7307558; doi:10.7717/peerj.9387)
Supplement: Supplemental Information 7 [file peerj-08-9387-s007.xlsx]

## Sheet: Sheet1
Sample	27area	27OD	27background	27_corr	14area	14OD	14background	14_corr	highMWarea	highMWOD	highMWBG	highMW_corr	27kDa_%	14kDa_%	27/14	color_animal	color_hl_now	color_hl_sampling	reason_discarded	keep	group
126	2371	336.414	258.56	77.854	2453	285.313	220.168	65.145	19632	2455.56	1640.58	814.985	6.99492	6.80022	1.02863	blue	blue	blue	smeary	F
129	2112	241.087	144.827	96.26	1473	148.563	93.438	55.125	13601	1697.13	749.214	947.916	8.46157	5.01455	1.6874	orange	blue			F
134	2106	262.619	149.134	113.485	1538	166.784	105.252	61.532	13852	2000.25	795.412	1204.84	7.97182	4.4593	1.78768	blue	blue	blue		T	blue
133	944	96.46	50.83	45.63	1245	87.174	70.368	16.806	13081	1725.02	596.824	1128.19	3.66745	1.41153	2.59822	orange	grey			T	orange
136	1940	212.226	93.871	118.355	2293	199.9	118.823	81.077	6974	980.159	350.823	629.336	13.6588	9.78283	1.3962	blue	orange			T	blue
137	1694	140.048	102.873	37.175	1411	85.925	83.233	2.692	2974	341.279	204.679	136.6	14.4645	1.5255	9.48184	orange	grey		almost no protein	F
138	1668	157.19	84.993	72.197	1622	129.792	89.808	39.984	5627	770.06	296.556	473.504	11.3605	6.82688	1.66408	blue	blue	blue		T	blue
139	2973	379.943	302.596	77.347	1524	160.554	148.703	11.851	4165	523.039	400.129	122.91	22.165	5.58725	3.96707	orange	brown	brown	smeary	F
140	2309	268.847	161.104	107.743	2075	205.237	138.629	66.608	11437	1846.02	755.869	1090.15	8.06145	5.26753	1.5304	blue	brown	blue		T	blue
115	1792	112.176	74.757	37.419	1448	72.253	56.339	15.914	8858	1162.56	460.053	702.51	4.6993	2.10546	2.23195	orange	orange	orange		T	orange
116	2156	218.335	116.857	101.478	2129	175.089	95.673	79.416	9080	1321.61	461.586	860.025	9.59897	7.62941	1.25815	blue	blue	blue		T	blue
117	2393	154.895	121.029	33.866	2393	120.806	114.208	6.598	4807	361.266	263.031	98.235	13.7494	4.75706	2.89031	orange	orange	orange	smeary	F
118	2482	243.078	110.404	132.674	1785	155.117	67.899	87.218	8882	1205.24	371.965	833.274	12.833	8.28151	1.5496	blue	blue	blue		T	blue
99																orange	orange	orange	very smeary	F
96	2337	208.531	86.121	122.41	2392	186.338	88.018	98.32	12068	1643.83	394.22	1249.61	8.38401	6.68687	1.2538	blue	blue	blue		T	blue
121																orange	orange		very smeary	F
122																blue	blue		very smeary	F
125	1367	68.431	44.686	23.745	875	29.271	26.464	2.807	11940	1355.58	197.361	1158.22	1.96495	0.236923	8.29361	orange	orange			T	orange
127	1379	87.119	70.532	16.587	1620	88.688	67.775	20.913	8291	673.285	427.038	246.247	5.0171	7.3703	0.680719	orange	grey	grey	quite smeary	F
168	2542	141.719	49.74	91.979	2730	138.165	71.875	66.29	10074	1014.09	197.303	816.791	9.37944	6.79856	1.37962	blue	orange	blue		T	blue
172	966	25.39	15.95	9.44	966	26.667	20.074	6.593	2618	139.243	46.461	92.782	7.71898	6.05891	1.27399	blue	white	blue	small amount of protein... but clear	T	blue
189	2807	132.056	102.217	29.839	2939	108.807	88.336	20.471	12114	1053.59	277.965	775.625	3.33844	2.47852	1.34695	orange	orange	orange		T	orange
2DE_2	1566	323.375	189.331	134.044	740	168.325	100.69	67.635	44103	11467.1	5891.35	5575.75	2.30693	1.17068	1.9706	blue	blue	blue		2DE
2DE_1	524	101.002	61.97	39.032	610	106.177	77.792	28.385	34259	9012.44	4279.4	4733.04	0.804806	0.591298	1.36108	orange	orange	orange		2DE
Eviy	5080	330.107	262.502	67.605	121	56.132	30.114	26.018	155054	31639.7	11797.8	19841.9	0.339048	0.130511	2.59786	yellow				F
Evib	13277	2014.59	995.007	1019.58	4330	730.258	526.666	203.592	120651	23887.6	3774.92	20112.7	4.70743	0.954225	4.93325	teal				F
