# Supplementary material for: The level of putative carotenoid-binding proteins determines the body color in two species of endemic Lake Baikal amphipods
Source: PeerJ. 2020 Jun 19;8:e9387. doi: 10.7717/peerj.9387 (PMC7307558; doi:10.7717/peerj.9387)
Supplement: Supplemental Information 8 [file peerj-08-9387-s008.xls]

## Sheet: Ecy25 kDa_proteins
	Main Accession	Description	Gene Name	Chromosome	MW [kDa]	Possible Coverage [%]	Coverage [%]	Spectrum Counting	Confidently Localized Modification Sites	# Confidently Localized Modification Sites	Ambiguously Localized Modification Sites	#Ambiguously Localized Modification Sites	Protein Inference	Secondary Accessions	Protein Group	#Validated Peptides	#Peptides	#Unique	#Validated Unique	#Unique to Group	#Validated Unique to Group	#Validated PSMs	#PSMs	Confidence [%]	Validation
19	GEPS01030296.1|:56-799(+)				27.3802	87.45	59.92	25348.3	Oxidation of M(M164, M170, M229)	Oxidation of M(3)			Single Protein		GEPS01030296.1|:56-799(+)	64	92	92	64	92	64	903	955	100	Doubtful
33	GEPS01058494.1|:3-5090(-)				187.516	88.21	7.25	583.819					Single Protein		GEPS01058494.1|:3-5090(-)	20	38	38	20	38	20	149	178	100	Doubtful
24	P02768-1 SWISS-PROT:P02768-1 Tax_Id=9606 Gene_Symbol=ALB Isoform 1 of Serum albumin precursor				69.3215	100	26.93	636.834	Oxidation of M(M353)	Oxidation of M(1)			Single Protein		P02768-1 SWISS-PROT:P02768-1 Tax_Id=9606 Gene_Symbol=ALB Isoform 1 of Serum albumin precursor	20	30	27	18	30	20	73	88	100	Doubtful
8	P35527 SWISS-PROT:P35527 Tax_Id=9606 Gene_Symbol=KRT9 Keratin, type I cytoskeletal 9				62.0919	63.72	43.66	674.933	Oxidation of M(M269)	Oxidation of M(1)			Single Protein		P35527 SWISS-PROT:P35527 Tax_Id=9606 Gene_Symbol=KRT9 Keratin, type I cytoskeletal 9	22	25	25	22	25	22	56	60	100	Doubtful
36	P00761 SWISS-PROT:P00761|TRYP_PIG Trypsin - Sus scrofa (Pig).				24.3938	68.4	28.57	8900.37	Oxidation of M(M94)	Oxidation of M(1)			Single Protein		P00761 SWISS-PROT:P00761|TRYP_PIG Trypsin - Sus scrofa (Pig).	17	24	23	16	23	16	224	239	100	Doubtful
1	P04264 SWISS-PROT:P04264 Tax_Id=9606 Gene_Symbol=KRT1 Keratin, type II cytoskeletal 1				65.978	69.25	33.23	993.001					Single Protein		P04264 SWISS-PROT:P04264 Tax_Id=9606 Gene_Symbol=KRT1 Keratin, type II cytoskeletal 1	21	22	15	14	20	19	69	72	100	Doubtful
23	GEPS01060173.1|:1-10512(+)				393.249	93.55	2.91	67.4528					Single Protein		GEPS01060173.1|:1-10512(+)	8	22	22	8	22	8	21	45	100	Doubtful
41	GEPS01035518.1|:1418-2158(-)				27.9478	100	53.25	1271.74					Single Protein		GEPS01035518.1|:1418-2158(-)	13	19	13	8	19	13	44	63	100	Doubtful
42	GEPS01059142.1|:104-2128(-)				76.9379	70.03	20.18	410.464					Single Protein		GEPS01059142.1|:104-2128(-)	11	18	16	11	16	11	32	40	100	Doubtful
7	P35908 SWISS-PROT:P35908 Tax_Id=9606 Gene_Symbol=KRT2 Keratin, type II cytoskeletal 2 epidermal				65.8254	87.6	24.65	457.944					Single Protein		P35908 SWISS-PROT:P35908 Tax_Id=9606 Gene_Symbol=KRT2 Keratin, type II cytoskeletal 2 epidermal	14	16	10	9	14	12	39	41	100	Doubtful
16	GEPS01043475.1|:651-1523(-)				31.642	74.48	55.86	1646.98					Single Protein		GEPS01043475.1|:651-1523(-)	14	16	16	14	16	14	47	51	100	Doubtful
2	GEPS01048854.1|:137-1651(-)				57.5734	78.37	23.41	654.468	Oxidation of M(M473)	Oxidation of M(1)			Single Protein		GEPS01048854.1|:137-1651(-)	12	15	11	8	11	8	37	41	100	Doubtful
13	GEPS01040334.1|:213-941(+)				26.7794	80.99	62.81	2905.53	Oxidation of M(M198, M226)	Oxidation of M(2)			Single Protein		GEPS01040334.1|:213-941(+)	15	15	15	15	15	15	74	75	100	Doubtful
18	GEPS01035623.1|:561-1340(-)				29.2577	75.29	30.89	1835.14	Oxidation of M(M245)	Oxidation of M(1)			Single Protein		GEPS01035623.1|:561-1340(-)	9	15	15	9	15	9	41	47	100	Doubtful
14	P13645 SWISS-PROT:P13645 Tax_Id=9606 Gene_Symbol=KRT10 Keratin, type I cytoskeletal 10				59.4749	70.83	22.26	583.663					Single Protein		P13645 SWISS-PROT:P13645 Tax_Id=9606 Gene_Symbol=KRT10 Keratin, type I cytoskeletal 10	12	14	7	7	14	12	31	33	100	Doubtful
29	GEPS01050968.1|:92-1477(+)				50.6053	85.9	18	300.124					Related Proteins	GEPS01050969.1|:92-1477(+)	GEPS01050968.1|:92-1477(+), GEPS01050969.1|:92-1477(+)	6	11	7	2	11	6	15	20	100	Doubtful
39	GEPS01059958.1|:3-581(-)				22.5441	79.27	36.79	1448.1					Single Protein		GEPS01059958.1|:3-581(-)	8	11	7	6	7	6	23	25	100	Doubtful
22	GEPS01057172.1|:2639-3469(-)				29.7741	76.81	26.09	901.542					Single Protein		GEPS01057172.1|:2639-3469(-)	6	10	10	6	10	6	19	25	100	Doubtful
4	GEPS01045182.1|:1123-1914(-)				29.1777	88.21	33.84	1451.56	Oxidation of M(M49)	Oxidation of M(1)			Single Protein		GEPS01045182.1|:1123-1914(-)	7	9	9	7	9	7	23	25	100	Doubtful
5	GEPS01034377.1|:9-2516(-)				94.8422	69.94	2.99	141.817					Single Protein		GEPS01034377.1|:9-2516(-)	1	8	8	1	8	1	3	15	100	Doubtful
6	GEPS01060178.1|:3-998(-)				37.254	100	28.01	642.577					Single Protein		GEPS01060178.1|:3-998(-)	6	8	8	6	8	6	18	20	100	Doubtful
12	GEPS01050564.1|:2-943(+)				33.9487	90.73	21.41	959.781					Single Protein		GEPS01050564.1|:2-943(+)	6	7	7	6	7	6	23	23	100	Doubtful
25	GEPS01048853.1|:1-567(-)				21.1817	60.85	37.57	1813.03					Single Protein		GEPS01048853.1|:1-567(-)	6	7	7	6	7	6	17	18	100	Doubtful
31	GEPS01059141.1|:299-1369(-)				39.9807	62.64	14.33	813.488					Single Protein		GEPS01059141.1|:299-1369(-)	4	7	5	4	5	4	10	13	100	Doubtful
11	GEPS01012404.1|:27-827(-)				30.0217	100	7.52	163.676					Single Protein		GEPS01012404.1|:27-827(-)	2	6	6	2	6	2	2	11	100	Doubtful
27	GEPS01048855.1|:2-304(+)				11.3434	54.46	26.73	2902.53	Oxidation of M(M67)	Oxidation of M(1)			Single Protein		GEPS01048855.1|:2-304(+)	3	6	4	3	4	3	11	13	100	Doubtful
38	GEPS01038602.1|:205-972(+)				29.314	100	12.5	491.313					Single Protein		GEPS01038602.1|:205-972(+)	3	6	6	3	6	3	6	10	100	Doubtful
10	GEPS01059956.1|:1-1098(+)				41.002	55.07	3.56	613.718	Oxidation of M(M334)	Oxidation of M(1)			Single Protein		GEPS01059956.1|:1-1098(+)	2	5	3	0	3	0	12	14	100	Doubtful
21	GEPS01055771.1|:3627-4553(-)				33.91	70.45	2.6	0					Single Protein		GEPS01055771.1|:3627-4553(-)	1	5	5	1	5	1	0	65	100	Doubtful
26	GEPS01055219.1|:1029-1835(-)				30.0801	72.01	16.79	314.549					Related Proteins	GEPS01055220.1|:1148-1969(-), GEPS01055221.1|:1126-1947(-), GEPS01055222.1|:1007-1813(-), GEPS01055223.1|:1095-1922(-), GEPS01055225.1|:1117-1944(-)	GEPS01055219.1|:1029-1835(-), GEPS01055220.1|:1148-1969(-), GEPS01055221.1|:1126-1947(-), GEPS01055222.1|:1007-1813(-), GEPS01055223.1|:1095-1922(-), GEPS01055225.1|:1117-1944(-)	3	5	0	0	5	3	8	13	100	Doubtful
3	GEPS01047624.1|:443-3127(-)				99.2751	91.95	0	0					Single Protein		GEPS01047624.1|:443-3127(-)	0	4	4	0	4	0	3	7	100	Doubtful
17	GEPS01056786.1|:886-1605(-)				27.9431	100	3.77	364.334					Related Proteins	GEPS01056787.1|:3528-4247(-)	GEPS01056786.1|:886-1605(-), GEPS01056787.1|:3528-4247(-)	1	3	3	1	3	1	3	5	100	Doubtful
20	P07477 SWISS-PROT:P07477 Tax_Id=9606 Gene_Symbol=PRSS1 Trypsin-1 precursor				26.5411	57.49	11.34	843.757					Single Protein		P07477 SWISS-PROT:P07477 Tax_Id=9606 Gene_Symbol=PRSS1 Trypsin-1 precursor	2	3	2	1	2	1	7	10	100	Doubtful
32	GEPS01052512.1|:800-3496(-)				100.71	83.74	1.34	19.2987					Related Proteins	GEPS01052513.1|:800-2284(-)	GEPS01052512.1|:800-3496(-), GEPS01052513.1|:800-2284(-)	1	3	0	0	3	1	1	6	100	Doubtful
9	GEPS01056244.1|:117-668(+)				20.4412	100	5.98	473.238					Related Proteins	GEPS01056247.1|:531-1148(-)	GEPS01056244.1|:117-668(+), GEPS01056247.1|:531-1148(-)	1	2	2	1	2	1	3	4	100	Doubtful
30	GEPS01059995.1|:2808-3503(-)				24.4974	83.98	17.32	448.844					Single Protein		GEPS01059995.1|:2808-3503(-)	2	2	2	2	2	2	5	5	100	Doubtful
34	GEPS01053416.1|:455-898(-)				15.827	74.15	14.29	532.573					Single Protein		GEPS01053416.1|:455-898(-)	1	2	2	1	2	1	2	15	100	Doubtful
35	GEPS01044218.1|:929-1267(-)				12.5179	100	17.86	259.154					Related Proteins	GEPS01060251.1|:18-449(-), GEPS01060256.1|:1-411(-), GEPS01060257.1|:1-345(-)	GEPS01044218.1|:929-1267(-), GEPS01060251.1|:18-449(-), GEPS01060256.1|:1-411(-), GEPS01060257.1|:1-345(-)	1	2	0	0	2	1	2	3	100	Doubtful
37	GEPS01033292.1|:367-984(-)				23.2385	80.49	10.24	527.732					Single Protein		GEPS01033292.1|:367-984(-)	1	2	2	1	2	1	3	6	100	Doubtful
40	GEPS01037834.1|:77-730(-)				24.5984	84.33	3.69	317.216					Related Proteins	GEPS01037835.1|:77-730(-)	GEPS01037834.1|:77-730(-), GEPS01037835.1|:77-730(-)	1	2	2	1	2	1	2	3	100	Doubtful
15	GEPS01032638.1|:161-925(+)				27.9502	88.58	3.54	342.818					Single Protein		GEPS01032638.1|:161-925(+)	1	1	1	1	1	1	3	3	100	Doubtful
28	GEPS01011388.1|:117-758(+)				24.5586	100	3.76	272.538					Single Protein		GEPS01011388.1|:117-758(+)	1	1	1	1	1	1	2	2	100	Doubtful

## Sheet: Ecy 25 kDa_peptides
	Protein(s)	Protein Group(s)	#Validated Protein Group(s)	Unique Database	Sequence	Modified Sequence	Position	AAs Before	AAs After	Variable Modifications	Fixed Modifications	Localization Confidence	#Validated PSMs	#PSMs	Confidence [%]	Validation
1	ENSEMBL:ENSBTAP00000038253 (Bos taurus) 63 kDa protein; P02538 SWISS-PROT:P02538 Tax_Id=9606 Gene_Symbol=KRT6A Keratin, type II cytoskeletal 6A; P04259 SWISS-PROT:P04259 Tax_Id=9606 Gene_Symbol=KRT6B Keratin, type II cytoskeletal 6B; P19013 SWISS-PROT:P19013 Tax_Id=9606 Gene_Symbol=KRT4 keratin 4; P35908 SWISS-PROT:P35908 Tax_Id=9606 Gene_Symbol=KRT2 Keratin, type II cytoskeletal 2 epidermal; P48…	ENSEMBL:ENSBTAP00000038253 (Bos taurus) 63 kDa protein (Not Validated); P02538 SWISS-PROT:P02538 Tax_Id=9606 Gene_Symbol=KRT6A Keratin, type II cytoskeletal 6A (Not Validated); P19013 SWISS-PROT:P19013 Tax_Id=9606 Gene_Symbol=KRT4 keratin 4 (Not Validated); P35908 SWISS-PROT:P35908 Tax_Id=9606 Gene_Symbol=KRT2 Keratin, type II cytoskeletal 2 epidermal (Doubtful); P48668 SWISS-PROT:P48668 Tax_Id=9…	1	0	AQYEEIAQR	NH2-AQYEEIAQR-COOH	352; 339; 339; 387; 360; 339	VK; VK; VK; VR; VK; VK	SK; SR; SR; SK; SK; SR				3	3	100	Confident
2	GEPS01040334.1|:213-941(+)	GEPS01040334.1|:213-941(+) (Doubtful)	1	1	SGLGQPIPSPQEATFR	NH2-SGLGQPIPSPQEATFR-COOH	118	LK	NK				6	6	100	Confident
3	GEPS01058494.1|:3-5090(-)	GEPS01058494.1|:3-5090(-) (Doubtful)	1	1	LIGVAAAQR	NH2-LIGVAAAQR-COOH	170	HK	EL				9	9	100	Confident
4	P00761 SWISS-PROT:P00761|TRYP_PIG Trypsin - Sus scrofa (Pig).	P00761 SWISS-PROT:P00761|TRYP_PIG Trypsin - Sus scrofa (Pig). (Doubtful)	1	1	LSSPATLNSR	NH2-LSSPATLNSR-COOH	98	IK	VA				16	16	100	Confident
5	P13645 SWISS-PROT:P13645 Tax_Id=9606 Gene_Symbol=KRT10 Keratin, type I cytoskeletal 10	P13645 SWISS-PROT:P13645 Tax_Id=9606 Gene_Symbol=KRT10 Keratin, type I cytoskeletal 10 (Doubtful)	1	1	VLDELTLTK	NH2-VLDELTLTK-COOH	258	RR	AD				3	3	100	Confident
6	GEPS01048854.1|:137-1651(-); GEPS01059958.1|:3-581(-)	GEPS01048854.1|:137-1651(-) (Doubtful); GEPS01059958.1|:3-581(-) (Doubtful)	2	0	KGELFFWAH	NH2-KGELFFWAH-COOH	67; 102	DR; DR	HQ; HQ				2	2	93.3333	Doubtful
7	GEPS01059142.1|:104-2128(-)	GEPS01059142.1|:104-2128(-) (Doubtful)	1	1	EADAAVTSGSSLPSHNSR	NH2-EADAAVTSGSSLPSHNSR-COOH	565	IK	GC				1	1	100	Confident
8	GEPS01026885.1|:1-1098(+); GEPS01050968.1|:92-1477(+); GEPS01050969.1|:92-1477(+); GEPS01052949.1|:2-298(-)	GEPS01026885.1|:1-1098(+) (Not Validated); GEPS01050968.1|:92-1477(+), GEPS01050969.1|:92-1477(+) (Doubtful); GEPS01052949.1|:2-298(-) (Not Validated)	1	0	QTVAVGVIK	NH2-QTVAVGVIK-COOH	334; 431; 431; 85	MR; MK; MK; MK	DV; DV; EV; GT				2	2	100	Confident
9	P35527 SWISS-PROT:P35527 Tax_Id=9606 Gene_Symbol=KRT9 Keratin, type I cytoskeletal 9	P35527 SWISS-PROT:P35527 Tax_Id=9606 Gene_Symbol=KRT9 Keratin, type I cytoskeletal 9 (Doubtful)	1	1	KGPAAIQK	NH2-KGPAAIQK-COOH	192	DK	NY				1	1	100	Confident
10	P04264 SWISS-PROT:P04264 Tax_Id=9606 Gene_Symbol=KRT1 Keratin, type II cytoskeletal 1	P04264 SWISS-PROT:P04264 Tax_Id=9606 Gene_Symbol=KRT1 Keratin, type II cytoskeletal 1 (Doubtful)	1	1	QISNLQQSISDAEQR	NH2-QISNLQQSISDAEQR-COOH	418	KK	GE				3	3	100	Confident
11	GEPS01040334.1|:213-941(+)	GEPS01040334.1|:213-941(+) (Doubtful)	1	1	STHATVASVSTFLDDHASLYLDHVK	NH2-STHATVASVSTFLDDHASLYLDHVK-COOH	24	EA	SH				6	6	100	Confident
12	P02768-1 SWISS-PROT:P02768-1 Tax_Id=9606 Gene_Symbol=ALB Isoform 1 of Serum albumin precursor	P02768-1 SWISS-PROT:P02768-1 Tax_Id=9606 Gene_Symbol=ALB Isoform 1 of Serum albumin precursor (Doubtful)	1	1	TYETTLEK	NH2-TYETTLEK-COOH	376	AK	CC				2	2	100	Confident
13	GEPS01048855.1|:2-304(+)	GEPS01048855.1|:2-304(+) (Doubtful)	1	1	AYTAQMTQTPGNFK	NH2-AYTAQMTQTPGNFK-COOH	62	QK	MD				3	3	100	Confident
14	GEPS01033292.1|:367-984(-)	GEPS01033292.1|:367-984(-) (Doubtful)	1	1	DASSGWGALVHVIEPHQVTTR	NH2-DASSGWGALVHVIEPHQVTTR-COOH	178	DR	RL				3	3	100	Confident
15	GEPS01059141.1|:299-1369(-)	GEPS01059141.1|:299-1369(-) (Doubtful)	1	1	FWTPLSAGSNTIVR	NH2-FWTPLSAGSNTIVR-COOH	212	DK	KS				1	1	100	Confident
16	GEPS01048854.1|:137-1651(-)	GEPS01048854.1|:137-1651(-) (Doubtful)	1	1	KGELFFWAHHQLTAR	NH2-KGELFFWAHHQLTAR-COOH	67	DR	FD				6	6	100	Confident
17	GEPS01016300.1|:1-735(-); GEPS01035518.1|:1418-2158(-)	GEPS01016300.1|:1-735(-) (Not Validated); GEPS01035518.1|:1418-2158(-) (Doubtful)	1	0	VISSIEQK	NH2-VISSIEQK-COOH	62; 62	WR; WR	TE; TE				5	5	100	Confident
18	P04264 SWISS-PROT:P04264 Tax_Id=9606 Gene_Symbol=KRT1 Keratin, type II cytoskeletal 1; P35908 SWISS-PROT:P35908 Tax_Id=9606 Gene_Symbol=KRT2 Keratin, type II cytoskeletal 2 epidermal	P04264 SWISS-PROT:P04264 Tax_Id=9606 Gene_Symbol=KRT1 Keratin, type II cytoskeletal 1 (Doubtful); P35908 SWISS-PROT:P35908 Tax_Id=9606 Gene_Symbol=KRT2 Keratin, type II cytoskeletal 2 epidermal (Doubtful)	2	0	IEISELNR	NH2-IEISELNR-COOH	396; 400	SK; IK	VI; VI				3	3	100	Confident
19	P35527 SWISS-PROT:P35527 Tax_Id=9606 Gene_Symbol=KRT9 Keratin, type I cytoskeletal 9	P35527 SWISS-PROT:P35527 Tax_Id=9606 Gene_Symbol=KRT9 Keratin, type I cytoskeletal 9 (Doubtful)	1	1	VQALEEANNDLENK	NH2-VQALEEANNDLENK-COOH	171	DK	IQ				5	5	100	Confident
20	GEPS01044218.1|:929-1267(-); GEPS01060251.1|:18-449(-); GEPS01060256.1|:1-411(-); GEPS01060257.1|:1-345(-)	GEPS01044218.1|:929-1267(-), GEPS01060251.1|:18-449(-), GEPS01060256.1|:1-411(-), GEPS01060257.1|:1-345(-) (Doubtful); GEPS01050013.1|:1-402(-), GEPS01050014.1|:1-1068(-), GEPS01050015.1|:1-651(-), GEPS01060251.1|:18-449(-), GEPS01060256.1|:1-411(-) (Not Validated); GEPS01060251.1|:18-449(-), GEPS01060256.1|:1-411(-), GEPS01060257.1|:1-345(-) (Not Validated)	1	0	AFVHWYVGEGMEEGEFSEAR	NH2-AFVHWYVGEGMEEGEFSEAR-COOH	62; 104; 103; 81	KR; KR; KR; KR	ED; ED; ED; ED				2	2	100	Confident
21	P35527 SWISS-PROT:P35527 Tax_Id=9606 Gene_Symbol=KRT9 Keratin, type I cytoskeletal 9	P35527 SWISS-PROT:P35527 Tax_Id=9606 Gene_Symbol=KRT9 Keratin, type I cytoskeletal 9 (Doubtful)	1	1	FSSSSGYGGGSSR	NH2-FSSSSGYGGGSSR-COOH	47	GR	VC				1	1	100	Confident
22	P13645 SWISS-PROT:P13645 Tax_Id=9606 Gene_Symbol=KRT10 Keratin, type I cytoskeletal 10	P13645 SWISS-PROT:P13645 Tax_Id=9606 Gene_Symbol=KRT10 Keratin, type I cytoskeletal 10 (Doubtful)	1	1	GSLGGGFSSGGFSGGSFSR	NH2-GSLGGGFSSGGFSGGSFSR-COOH	41	SK	GS				3	3	100	Confident
23	GEPS01059994.1|:3007-3783(-); GEPS01059995.1|:2808-3503(-)	GEPS01059995.1|:2808-3503(-) (Doubtful)	1	1	HAFLLDSFVQGAVDPQDK	NH2-HAFLLDSFVQGAVDPQDK-COOH	142; 115	LR; LR	AM; AM				4	4	100	Confident
24	GEPS01030296.1|:56-799(+)	GEPS01030296.1|:56-799(+) (Doubtful)	1	1	GDQFQLGGLGDFLSDYSDSDK	NH2-GDQFQLGGLGDFLSDYSDSDK-COOH	208	AR	MF				87	89	100	Confident
25	GEPS01043475.1|:651-1523(-)	GEPS01043475.1|:651-1523(-) (Doubtful)	1	1	FGSFQDFKDQFSAASVAVK	NH2-FGSFQDFKDQFSAASVAVK-COOH	189	DR	GS				1	2	100	Confident
26	GEPS01030296.1|:56-799(+)	GEPS01030296.1|:56-799(+) (Doubtful)	1	1	QTYFTEDTVR	NH2-QTYFTEDTVR-COOH	93	GA	YL				3	3	93.3333	Doubtful
27	GEPS01035623.1|:561-1340(-)	GEPS01035623.1|:561-1340(-) (Doubtful)	1	1	FHQPDVSSNNGVENLFALAR	NH2-FHQPDVSSNNGVENLFALAR-COOH	79	TK	KR				6	6	100	Confident
28	P00761 SWISS-PROT:P00761|TRYP_PIG Trypsin - Sus scrofa (Pig).	P00761 SWISS-PROT:P00761|TRYP_PIG Trypsin - Sus scrofa (Pig). (Doubtful)	1	1	LGEHNIDVLEGNEQFINAA	NH2-LGEHNIDVLEGNEQFINAA-COOH	58	VR	KI				2	2	100	Confident
29	GEPS01030296.1|:56-799(+)	GEPS01030296.1|:56-799(+) (Doubtful)	1	1	DQGAQTYFTEDTVR	NH2-DQGAQTYFTEDTVR-COOH	89	SS	YL				3	3	86.6667	Doubtful
30	GEPS01030296.1|:56-799(+)	GEPS01030296.1|:56-799(+) (Doubtful)	1	1	QGAQTYFTEDTVR	pyro-QGAQTYFTEDTVR-COOH	90	SD	YL	Pyrolidone from Q (1)			3	3	100	Confident
31	P13645 SWISS-PROT:P13645 Tax_Id=9606 Gene_Symbol=KRT10 Keratin, type I cytoskeletal 10	P13645 SWISS-PROT:P13645 Tax_Id=9606 Gene_Symbol=KRT10 Keratin, type I cytoskeletal 10 (Doubtful)	1	1	LKYENEVALR	NH2-LKYENEVALR-COOH	236	FR	QS				3	3	100	Confident
32	GEPS01056786.1|:886-1605(-); GEPS01056787.1|:3528-4247(-)	GEPS01056786.1|:886-1605(-), GEPS01056787.1|:3528-4247(-) (Doubtful)	1	1	LREELPYYK	NH2-LREELPYYK-COOH	195; 195	NR; NR	EC; EC				3	3	100	Confident
33	P04264 SWISS-PROT:P04264 Tax_Id=9606 Gene_Symbol=KRT1 Keratin, type II cytoskeletal 1	P04264 SWISS-PROT:P04264 Tax_Id=9606 Gene_Symbol=KRT1 Keratin, type II cytoskeletal 1 (Doubtful)	1	1	NMQDMVEDYR	NH2-NMQDMVEDYR-COOH	258	LK	NK				3	3	100	Confident
34	P00761 SWISS-PROT:P00761|TRYP_PIG Trypsin - Sus scrofa (Pig).	P00761 SWISS-PROT:P00761|TRYP_PIG Trypsin - Sus scrofa (Pig). (Doubtful)	1	1	FNGNTLDNDIMLIK	NH2-FNGNTLDNDIMLIK-COOH	84	PN	LS				3	3	100	Confident
35	ENSEMBL:ENSBTAP00000038253 (Bos taurus) 63 kDa protein; P04264 SWISS-PROT:P04264 Tax_Id=9606 Gene_Symbol=KRT1 Keratin, type II cytoskeletal 1	ENSEMBL:ENSBTAP00000038253 (Bos taurus) 63 kDa protein (Not Validated); P04264 SWISS-PROT:P04264 Tax_Id=9606 Gene_Symbol=KRT1 Keratin, type II cytoskeletal 1 (Doubtful)	1	0	SLNNQFASFIDK	NH2-SLNNQFASFIDK-COOH	182; 186	IK; IK	VR; VR				3	3	100	Confident
36	P02768-1 SWISS-PROT:P02768-1 Tax_Id=9606 Gene_Symbol=ALB Isoform 1 of Serum albumin precursor	P02768-1 SWISS-PROT:P02768-1 Tax_Id=9606 Gene_Symbol=ALB Isoform 1 of Serum albumin precursor (Doubtful)	1	1	SLHTLFGDK	NH2-SLHTLFGDK-COOH	89	DK	LC				3	3	100	Confident
37	GEPS01035518.1|:1418-2158(-)	GEPS01035518.1|:1418-2158(-) (Doubtful)	1	1	DNLTLWTSDTQAEAEDGNEGEAN	NH2-DNLTLWTSDTQAEAEDGNEGEAN-COOH	224	LR					2	3	100	Confident
38	P02768-1 SWISS-PROT:P02768-1 Tax_Id=9606 Gene_Symbol=ALB Isoform 1 of Serum albumin precursor	P02768-1 SWISS-PROT:P02768-1 Tax_Id=9606 Gene_Symbol=ALB Isoform 1 of Serum albumin precursor (Doubtful)	1	1	DVFLGMFLYEYAR	NH2-DVFLGM<ox>FLYEYAR-COOH	348	AK	RH	Oxidation of M (6)		Oxidation of M (6: Very Confident)	3	4	100	Confident
39	GEPS01059142.1|:104-2128(-)	GEPS01059142.1|:104-2128(-) (Doubtful)	1	1	FWTQLHAGSNTIVR	NH2-FWTQLHAGSNTIVR-COOH	531	DK	KS				1	1	100	Confident
40	GEPS01060173.1|:1-10512(+)	GEPS01060173.1|:1-10512(+) (Doubtful)	1	1	VNSAIPGWEVLALLGR	NH2-VNSAIPGWEVLALLGR-COOH	2746	IR	ID				3	3	100	Confident
41	P00761 SWISS-PROT:P00761|TRYP_PIG Trypsin - Sus scrofa (Pig).	P00761 SWISS-PROT:P00761|TRYP_PIG Trypsin - Sus scrofa (Pig). (Doubtful)	1	1	VATVSLPR	NH2-VATVSLPR-COOH	108	SR	SC				21	21	100	Confident
42	GEPS01016300.1|:1-735(-); GEPS01035518.1|:1418-2158(-)	GEPS01016300.1|:1-735(-) (Not Validated); GEPS01035518.1|:1418-2158(-) (Doubtful)	1	0	QAFDDAIAELDTLNEDSYK	pyro-QAFDDAIAELDTLNEDSYK-COOH	195; 195	AK; AK	DS; DS	Pyrolidone from Q (1)			2	2	100	Confident
43	GEPS01057172.1|:2639-3469(-)	GEPS01057172.1|:2639-3469(-) (Doubtful)	1	1	TTVELIAK	NH2-TTVELIAK-COOH	247	LK	ED				3	3	99.6795	Doubtful
44	GEPS01030296.1|:56-799(+)	GEPS01030296.1|:56-799(+) (Doubtful)	1	1	ARGDQFQLGGLGDFLSDYSDSDK	NH2-ARGDQFQLGGLGDFLSDYSDSDK-COOH	206	LR	MF				18	21	100	Confident
45	GEPS01040334.1|:213-941(+)	GEPS01040334.1|:213-941(+) (Doubtful)	1	1	TPAEPQPTEDANGLK	NH2-TPAEPQPTEDANGLK-COOH	103	GR	SG				3	3	100	Confident
46	GEPS01059958.1|:3-581(-)	GEPS01059958.1|:3-581(-) (Doubtful)	1	1	KGELFFWAHHQLTVR	NH2-KGELFFWAHHQLTVR-COOH	102	DR	FD				3	3	100	Confident
47	GEPS01043475.1|:651-1523(-)	GEPS01043475.1|:651-1523(-) (Doubtful)	1	1	KLAELSGIEVDQIR	NH2-KLAELSGIEVDQIR-COOH	14	EK	KN				4	4	100	Confident
48	P00761 SWISS-PROT:P00761|TRYP_PIG Trypsin - Sus scrofa (Pig).	P00761 SWISS-PROT:P00761|TRYP_PIG Trypsin - Sus scrofa (Pig). (Doubtful)	1	1	LGEHNIDVLEGNEQF	NH2-LGEHNIDVLEGNEQF-COOH	58	VR	IN				3	3	99.6815	Doubtful
49	P02535-1 SWISS-PROT:P02535-1 Tax_Id=10090 Gene_Symbol=Krt10 Isoform 1 of Keratin, type I cytoskeletal 10; P13645 SWISS-PROT:P13645 Tax_Id=9606 Gene_Symbol=KRT10 Keratin, type I cytoskeletal 10	P02535-1 SWISS-PROT:P02535-1 Tax_Id=10090 Gene_Symbol=Krt10 Isoform 1 of Keratin, type I cytoskeletal 10 (Not Validated); P13645 SWISS-PROT:P13645 Tax_Id=9606 Gene_Symbol=KRT10 Keratin, type I cytoskeletal 10 (Doubtful)	1	0	ALEESNYELEGK	NH2-ALEESNYELEGK-COOH	164; 166	VR; VR	IK; IK				3	3	100	Confident
50	GEPS01035623.1|:561-1340(-)	GEPS01035623.1|:561-1340(-) (Doubtful)	1	1	YPSNVVSDIAK	NH2-YPSNVVSDIAK-COOH	107	IR	GI				6	6	100	Confident
51	GEPS01059142.1|:104-2128(-)	GEPS01059142.1|:104-2128(-) (Doubtful)	1	1	AVEALLDEIEAGR	NH2-AVEALLDEIEAGR-COOH	80	GK	VL				3	3	100	Confident
52	P00761 SWISS-PROT:P00761|TRYP_PIG Trypsin - Sus scrofa (Pig).	P00761 SWISS-PROT:P00761|TRYP_PIG Trypsin - Sus scrofa (Pig). (Doubtful)	1	1	LGEHNIDVLEGNEQFINA	NH2-LGEHNIDVLEGNEQFINA-COOH	58	VR	AK				3	3	100	Confident
53	GEPS01040334.1|:213-941(+)	GEPS01040334.1|:213-941(+) (Doubtful)	1	1	SLTYLFTGNAFGDQSVQRPGLAK	NH2-SLTYLFTGNAFGDQSVQRPGLAK-COOH	54	DK	VL				8	9	100	Confident
54	GEPS01045182.1|:1123-1914(-)	GEPS01045182.1|:1123-1914(-) (Doubtful)	1	1	SEEFKEQQESGIESAGQDLAEDLYYMK	NH2-SEEFKEQQESGIESAGQDLAEDLYYMK-COOH	95	SK	QF				2	2	100	Confident
55	GEPS01040334.1|:213-941(+)	GEPS01040334.1|:213-941(+) (Doubtful)	1	1	MSNLGLAQHIFDK	NH2-M<ox>SNLGLAQHIFDK-COOH	226	EK	SL	Oxidation of M (1)		Oxidation of M (1: Very Confident)	6	6	100	Confident
56	P35527 SWISS-PROT:P35527 Tax_Id=9606 Gene_Symbol=KRT9 Keratin, type I cytoskeletal 9	P35527 SWISS-PROT:P35527 Tax_Id=9606 Gene_Symbol=KRT9 Keratin, type I cytoskeletal 9 (Doubtful)	1	1	GGSGGSYGR	NH2-GGSGGSYGR-COOH	479	GR	GS				1	1	93.3333	Doubtful
57	P02768-1 SWISS-PROT:P02768-1 Tax_Id=9606 Gene_Symbol=ALB Isoform 1 of Serum albumin precursor	P02768-1 SWISS-PROT:P02768-1 Tax_Id=9606 Gene_Symbol=ALB Isoform 1 of Serum albumin precursor (Doubtful)	1	1	HPYFYAPELLFFAK	NH2-HPYFYAPELLFFAK-COOH	170	RR	RY				6	6	100	Confident
58	GEPS01060173.1|:1-10512(+)	GEPS01060173.1|:1-10512(+) (Doubtful)	1	1	IESNSVEIFNLEFK	NH2-IESNSVEIFNLEFK-COOH	2900	TK	RG				3	3	100	Confident
59	GEPS01060178.1|:3-998(-)	GEPS01060178.1|:3-998(-) (Doubtful)	1	1	VIQADVVYNSDGVR	NH2-VIQADVVYNSDGVR-COOH	233	GK	AR				3	3	100	Confident
60	GEPS01030296.1|:56-799(+)	GEPS01030296.1|:56-799(+) (Doubtful)	1	1	DFLSDYSDSDK	NH2-DFLSDYSDSDK-COOH	218	LG	MF				2	2	86.6667	Doubtful
61	GEPS01030296.1|:56-799(+)	GEPS01030296.1|:56-799(+) (Doubtful)	1	1	LPMHDIAYPFTPALLR	NH2-LPMHDIAYPFTPALLR-COOH	168	IC	WS				4	4	100	Confident
62	GEPS01059142.1|:104-2128(-)	GEPS01059142.1|:104-2128(-) (Doubtful)	1	1	YDANHIEYTLDEAR	NH2-YDANHIEYTLDEAR-COOH	509	PK	WG				3	3	100	Confident
63	GEPS01048854.1|:137-1651(-); GEPS01059956.1|:1-1098(+)	GEPS01048854.1|:137-1651(-) (Doubtful); GEPS01059956.1|:1-1098(+) (Doubtful)	2	0	YPDHQPMGFPLDR	NH2-YPDHQPM<ox>GFPLDR-COOH	467; 328	EK; EK	RI; RI	Oxidation of M (7)		Oxidation of M (7: Very Confident)	5	5	100	Confident
64	GEPS01060173.1|:1-10512(+)	GEPS01060173.1|:1-10512(+) (Doubtful)	1	1	VEAQGTGNLPTR	NH2-VEAQGTGNLPTR-COOH	2957	FK	GS				3	3	100	Confident
65	P00761 SWISS-PROT:P00761|TRYP_PIG Trypsin - Sus scrofa (Pig).	P00761 SWISS-PROT:P00761|TRYP_PIG Trypsin - Sus scrofa (Pig). (Doubtful)	1	1	IITHPNFNGNTLDNDIMLIKLSSPATLNSR	NH2-IITHPNFNGNTLDNDIMLIKLSSPATLNSR-COOH	78	AK	VA				6	6	100	Confident
66	GEPS01050564.1|:2-943(+)	GEPS01050564.1|:2-943(+) (Doubtful)	1	1	ENFSNLQNYLTEQFGVGSELR	NH2-ENFSNLQNYLTEQFGVGSELR-COOH	212	GK	VR				6	6	100	Confident
67	GEPS01030296.1|:56-799(+)	GEPS01030296.1|:56-799(+) (Doubtful)	1	1	FGASISSDQGAQTYFTEDTVR	NH2-FGASISSDQGAQTYFTEDTVR-COOH	82	AD	YL				4	4	100	Confident
68	GEPS01030296.1|:56-799(+)	GEPS01030296.1|:56-799(+) (Doubtful)	1	1	NVNFDALVAEVDTIPDADAHLK	NH2-NVNFDALVAEVDTIPDADAHLK-COOH	130	FD	AD				5	5	100	Confident
69	GEPS01030296.1|:56-799(+)	GEPS01030296.1|:56-799(+) (Doubtful)	1	1	QFQLGGLGDFLSDYSDSDK	NH2-QFQLGGLGDFLSDYSDSDK-COOH	210	GD	MF				3	3	100	Confident
70	GEPS01030296.1|:56-799(+)	GEPS01030296.1|:56-799(+) (Doubtful)	1	1	TANDQLYALYNR	NH2-TANDQLYALYNR-COOH	26	RV	QK				1	1	93.3333	Doubtful
71	P02535-1 SWISS-PROT:P02535-1 Tax_Id=10090 Gene_Symbol=Krt10 Isoform 1 of Keratin, type I cytoskeletal 10; P13645 SWISS-PROT:P13645 Tax_Id=9606 Gene_Symbol=KRT10 Keratin, type I cytoskeletal 10	P02535-1 SWISS-PROT:P02535-1 Tax_Id=10090 Gene_Symbol=Krt10 Isoform 1 of Keratin, type I cytoskeletal 10 (Not Validated); P13645 SWISS-PROT:P13645 Tax_Id=9606 Gene_Symbol=KRT10 Keratin, type I cytoskeletal 10 (Doubtful)	1	0	QSLEASLAETEGR	NH2-QSLEASLAETEGR-COOH	385; 387	LK; LK	YC; YC				2	2	100	Confident
72	P35527 SWISS-PROT:P35527 Tax_Id=9606 Gene_Symbol=KRT9 Keratin, type I cytoskeletal 9	P35527 SWISS-PROT:P35527 Tax_Id=9606 Gene_Symbol=KRT9 Keratin, type I cytoskeletal 9 (Doubtful)	1	1	IKFEMEQNLR	NH2-IKFEMEQNLR-COOH	241	FR	QG				4	4	100	Confident
73	P35527 SWISS-PROT:P35527 Tax_Id=9606 Gene_Symbol=KRT9 Keratin, type I cytoskeletal 9	P35527 SWISS-PROT:P35527 Tax_Id=9606 Gene_Symbol=KRT9 Keratin, type I cytoskeletal 9 (Doubtful)	1	1	FEMEQNLR	NH2-FEMEQNLR-COOH	243	IK	QG				3	3	100	Confident
74	P35527 SWISS-PROT:P35527 Tax_Id=9606 Gene_Symbol=KRT9 Keratin, type I cytoskeletal 9	P35527 SWISS-PROT:P35527 Tax_Id=9606 Gene_Symbol=KRT9 Keratin, type I cytoskeletal 9 (Doubtful)	1	1	QFSSSYLSR	NH2-QFSSSYLSR-COOH	5	CR	SG				1	1	100	Confident
75	GEPS01030296.1|:56-799(+)	GEPS01030296.1|:56-799(+) (Doubtful)	1	1	SDQGAQTYFTEDTVR	NH2-SDQGAQTYFTEDTVR-COOH	88	IS	YL				3	3	100	Confident
76	GEPS01058494.1|:3-5090(-)	GEPS01058494.1|:3-5090(-) (Doubtful)	1	1	IQFPLQYVYHYR	NH2-IQFPLQYVYHYR-COOH	16	SG	AK				15	15	100	Confident
77	GEPS01058494.1|:3-5090(-)	GEPS01058494.1|:3-5090(-) (Doubtful)	1	1	LSDVSFADTNGQR	NH2-LSDVSFADTNGQR-COOH	65	FK	DC				6	6	100	Confident
78	P13645 SWISS-PROT:P13645 Tax_Id=9606 Gene_Symbol=KRT10 Keratin, type I cytoskeletal 10	P13645 SWISS-PROT:P13645 Tax_Id=9606 Gene_Symbol=KRT10 Keratin, type I cytoskeletal 10 (Doubtful)	1	1	SLLEGEGSSGGGGR	NH2-SLLEGEGSSGGGGR-COOH	451	YR	GG				3	3	100	Confident
79	GEPS01012411.1|:1-591(+); GEPS01014906.1|:1-474(-); GEPS01026885.1|:1-1098(+); GEPS01038648.1|:1-576(-); GEPS01050968.1|:92-1477(+); GEPS01050969.1|:92-1477(+); GEPS01055636.1|:3-1079(-); GEPS01055640.1|:69-1280(-); GEPS01055641.1|:212-1099(-); GEPS01055644.1|:69-821(-); GEPS01057799.1|:1-375(-)	GEPS01012411.1|:1-591(+) (Not Validated); GEPS01026885.1|:1-1098(+) (Not Validated); GEPS01038648.1|:1-576(-) (Not Validated); GEPS01050968.1|:92-1477(+), GEPS01050969.1|:92-1477(+) (Doubtful); GEPS01055636.1|:3-1079(-) (Not Validated); GEPS01055640.1|:69-1280(-), GEPS01055643.1|:2-385(-) (Not Validated); GEPS01055640.1|:69-1280(-), GEPS01055645.1|:833-1366(-) (Not Validated); GEPS01055641.1|:212…	1	0	IGGIGTVPVGR	NH2-IGGIGTVPVGR-COOH	135; 90; 159; 90; 256; 256; 177; 247; 164; 94; 44	YK; YK; YK; YK; YK; YK; YK; YK; YK; YK; YK	VE; VE; VE; VE; VE; VE; VE; VE; VE; VE; VE				3	3	100	Confident
80	GEPS01043475.1|:651-1523(-)	GEPS01043475.1|:651-1523(-) (Doubtful)	1	1	NQLANAASEAASIQQMAK	NH2-NQLANAASEAASIQQMAK-COOH	29	RK	YV				6	6	100	Confident
81	GEPS01030296.1|:56-799(+)	GEPS01030296.1|:56-799(+) (Doubtful)	1	1	VAEVDTIPDADAHLK	NH2-VAEVDTIPDADAHLK-COOH	137	AL	AD				6	6	100	Confident
82	GEPS01048853.1|:1-567(-)	GEPS01048853.1|:1-567(-) (Doubtful)	1	1	AAAANFNPVADTSLYSDGGK	NH2-AAAANFNPVADTSLYSDGGK-COOH	75	LK	AV				3	3	100	Confident
83	P35908 SWISS-PROT:P35908 Tax_Id=9606 Gene_Symbol=KRT2 Keratin, type II cytoskeletal 2 epidermal	P35908 SWISS-PROT:P35908 Tax_Id=9606 Gene_Symbol=KRT2 Keratin, type II cytoskeletal 2 epidermal (Doubtful)	1	1	LNDLEEALQQAK	NH2-LNDLEEALQQAK-COOH	448	NK	ED				3	3	100	Confident
84	GEPS01016300.1|:1-735(-); GEPS01035518.1|:1418-2158(-)	GEPS01016300.1|:1-735(-) (Not Validated); GEPS01035518.1|:1418-2158(-) (Doubtful)	1	0	DSTLIMQLLR	NH2-DSTLIMQLLR-COOH	214; 214	YK; YK	DN; DN				3	3	100	Confident
85	GEPS01050968.1|:92-1477(+); GEPS01050969.1|:92-1477(+)	GEPS01050968.1|:92-1477(+), GEPS01050969.1|:92-1477(+) (Doubtful)	1	1	VETGQIKPGMVVTFAPSGLTTEVK	NH2-VETGQIKPGMVVTFAPSGLTTEVK-COOH	267; 267	GR; GR	SV; SV				3	3	100	Confident
86	GEPS01058494.1|:3-5090(-)	GEPS01058494.1|:3-5090(-) (Doubtful)	1	1	ELFADHHVTR	NH2-ELFADHHVTR-COOH	179	QR	DV				29	29	100	Confident
87	GEPS01030296.1|:56-799(+)	GEPS01030296.1|:56-799(+) (Doubtful)	1	1	GYMDEFDNVNFDALVAEVDTIPDADAHLK	NH2-GYMDEFDNVNFDALVAEVDTIPDADAHLK-COOH	123	EM	AD				2	2	100	Confident
88	GEPS01016300.1|:1-735(-); GEPS01035518.1|:1418-2158(-)	GEPS01016300.1|:1-735(-) (Not Validated); GEPS01035518.1|:1418-2158(-) (Doubtful)	1	0	QAFDDAIAELDTLNEDSYK	NH2-QAFDDAIAELDTLNEDSYK-COOH	195; 195	AK; AK	DS; DS				4	4	100	Confident
89	GEPS01030296.1|:56-799(+)	GEPS01030296.1|:56-799(+) (Doubtful)	1	1	TIPDADAHLK	NH2-TIPDADAHLK-COOH	142	VD	AD				3	3	86.6667	Doubtful
90	GEPS01038602.1|:205-972(+)	GEPS01038602.1|:205-972(+) (Doubtful)	1	1	IQLLEEDLER	NH2-IQLLEEDLER-COOH	92	RR	SE				2	2	100	Confident
91	P35908 SWISS-PROT:P35908 Tax_Id=9606 Gene_Symbol=KRT2 Keratin, type II cytoskeletal 2 epidermal	P35908 SWISS-PROT:P35908 Tax_Id=9606 Gene_Symbol=KRT2 Keratin, type II cytoskeletal 2 epidermal (Doubtful)	1	1	LQGEIAHVK	NH2-LQGEIAHVK-COOH	412	QR	KQ				1	1	100	Confident
92	GEPS01059142.1|:104-2128(-)	GEPS01059142.1|:104-2128(-) (Doubtful)	1	1	AIFSLFNDR	NH2-AIFSLFNDR-COOH	98	QK	QR				3	3	100	Confident
93	P00761 SWISS-PROT:P00761|TRYP_PIG Trypsin - Sus scrofa (Pig).	P00761 SWISS-PROT:P00761|TRYP_PIG Trypsin - Sus scrofa (Pig). (Doubtful)	1	1	LGEHNIDVLEGN	NH2-LGEHNIDVLEGN-COOH	58	VR	EQ				3	3	93.3333	Doubtful
94	P04264 SWISS-PROT:P04264 Tax_Id=9606 Gene_Symbol=KRT1 Keratin, type II cytoskeletal 1	P04264 SWISS-PROT:P04264 Tax_Id=9606 Gene_Symbol=KRT1 Keratin, type II cytoskeletal 1 (Doubtful)	1	1	WELLQQVDTSTR	NH2-WELLQQVDTSTR-COOH	212	TK	TH				7	8	100	Confident
95	GEPS01058494.1|:3-5090(-)	GEPS01058494.1|:3-5090(-) (Doubtful)	1	1	AEEKPWAINFYK	NH2-AEEKPWAINFYK-COOH	111	FN	SI				1	1	93.3333	Doubtful
96	GEPS01048853.1|:1-567(-)	GEPS01048853.1|:1-567(-) (Doubtful)	1	1	TWETAVNNAAYFR	NH2-TWETAVNNAAYFR-COOH	138	SK	EK				3	3	100	Confident
97	GEPS01053416.1|:455-898(-)	GEPS01053416.1|:455-898(-) (Doubtful)	1	1	MSAAKSTVDLGNPPQADTATR	NH2-MSAAKSTVDLGNPPQADTATR-COOH	123	GR	SR				2	14	93.3333	Doubtful
98	GEPS01048853.1|:1-567(-)	GEPS01048853.1|:1-567(-) (Doubtful)	1	1	INEPLGFPELK	NH2-INEPLGFPELK-COOH	64	YR	AA				3	3	100	Confident
99	P04264 SWISS-PROT:P04264 Tax_Id=9606 Gene_Symbol=KRT1 Keratin, type II cytoskeletal 1	P04264 SWISS-PROT:P04264 Tax_Id=9606 Gene_Symbol=KRT1 Keratin, type II cytoskeletal 1 (Doubtful)	1	1	AEAESLYQSK	NH2-AEAESLYQSK-COOH	367	SK	YE				3	3	100	Confident
100	GEPS01030296.1|:56-799(+)	GEPS01030296.1|:56-799(+) (Doubtful)	1	1	LGGLGDFLSDYSDSDK	NH2-LGGLGDFLSDYSDSDK-COOH	213	FQ	MF				3	3	100	Confident
101	P35908 SWISS-PROT:P35908 Tax_Id=9606 Gene_Symbol=KRT2 Keratin, type II cytoskeletal 2 epidermal	P35908 SWISS-PROT:P35908 Tax_Id=9606 Gene_Symbol=KRT2 Keratin, type II cytoskeletal 2 epidermal (Doubtful)	1	1	VDLLNQEIEFLK	NH2-VDLLNQEIEFLK-COOH	309	SK	VL				3	3	100	Confident
102	GEPS01055771.1|:3627-4553(-)	GEPS01055771.1|:3627-4553(-) (Doubtful)	1	1	CTYNTGEK	pyro-CTYNTGEK-COOH	27	IK	TL	Pyrolidone from carbamidomethylated C (1)	Carbamidomethylation of C (1)		0	55	93.3333	Doubtful
103	GEPS01030296.1|:56-799(+)	GEPS01030296.1|:56-799(+) (Doubtful)	1	1	ANDQLYALYNR	NH2-ANDQLYALYNR-COOH	27	VT	QK				5	5	93.3333	Doubtful
104	GEPS01058494.1|:3-5090(-)	GEPS01058494.1|:3-5090(-) (Doubtful)	1	1	ALENGLLTFNAEEKPWAINFYK	NH2-ALENGLLTFNAEEKPWAINFYK-COOH	101	PF	SI				5	5	100	Confident
105	P04264 SWISS-PROT:P04264 Tax_Id=9606 Gene_Symbol=KRT1 Keratin, type II cytoskeletal 1	P04264 SWISS-PROT:P04264 Tax_Id=9606 Gene_Symbol=KRT1 Keratin, type II cytoskeletal 1 (Doubtful)	1	1	SKAEAESLYQSK	NH2-SKAEAESLYQSK-COOH	365	QK	YE				3	3	100	Confident
106	GEPS01030296.1|:56-799(+)	GEPS01030296.1|:56-799(+) (Doubtful)	1	1	ALVAEVDTIPDADAHLK	NH2-ALVAEVDTIPDADAHLK-COOH	135	FD	AD				6	6	100	Confident
107	GEPS01030296.1|:56-799(+)	GEPS01030296.1|:56-799(+) (Doubtful)	1	1	MFAIVWAR	NH2-M<ox>FAIVWAR-COOH	229	DK	NV	Oxidation of M (1)		Oxidation of M (1: Very Confident)	36	39	100	Confident
108	GEPS01048853.1|:1-567(-)	GEPS01048853.1|:1-567(-) (Doubtful)	1	1	HHWFSLFNTR	NH2-HHWFSLFNTR-COOH	112	EQ	QR				3	3	86.6667	Doubtful
109	GEPS01058494.1|:3-5090(-)	GEPS01058494.1|:3-5090(-) (Doubtful)	1	1	SIVSLFNIPPLKEAFR	NH2-SIVSLFNIPPLKEAFR-COOH	123	YK	KT				2	2	100	Confident
110	GEPS01043475.1|:651-1523(-)	GEPS01043475.1|:651-1523(-) (Doubtful)	1	1	FGSFQDFK	NH2-FGSFQDFK-COOH	189	DR	DQ				3	3	100	Confident
111	P04264 SWISS-PROT:P04264 Tax_Id=9606 Gene_Symbol=KRT1 Keratin, type II cytoskeletal 1	P04264 SWISS-PROT:P04264 Tax_Id=9606 Gene_Symbol=KRT1 Keratin, type II cytoskeletal 1 (Doubtful)	1	1	SGGGFSSGSAGIINYQR	NH2-SGGGFSSGSAGIINYQR-COOH	13	YR	RT				3	3	100	Confident
112	P02768-1 SWISS-PROT:P02768-1 Tax_Id=9606 Gene_Symbol=ALB Isoform 1 of Serum albumin precursor	P02768-1 SWISS-PROT:P02768-1 Tax_Id=9606 Gene_Symbol=ALB Isoform 1 of Serum albumin precursor (Doubtful)	1	1	HPDYSVVLLLR	NH2-HPDYSVVLLLR-COOH	362	RR	LA				3	3	100	Confident
113	GEPS01048855.1|:2-304(+)	GEPS01048855.1|:2-304(+) (Doubtful)	1	1	TWEAALNNAAYFR	NH2-TWEAALNNAAYFR-COOH	3	CK	EQ				3	3	100	Confident
114	GEPS01012411.1|:1-591(+); GEPS01014906.1|:1-474(-); GEPS01026885.1|:1-1098(+); GEPS01038648.1|:1-576(-); GEPS01050968.1|:92-1477(+); GEPS01050969.1|:92-1477(+); GEPS01052949.1|:329-886(-); GEPS01055636.1|:3-1079(-); GEPS01055640.1|:69-1280(-); GEPS01055641.1|:212-1099(-); GEPS01055644.1|:69-821(-)	GEPS01012411.1|:1-591(+) (Not Validated); GEPS01026885.1|:1-1098(+) (Not Validated); GEPS01038648.1|:1-576(-) (Not Validated); GEPS01050968.1|:92-1477(+), GEPS01050969.1|:92-1477(+) (Doubtful); GEPS01052949.1|:329-886(-) (Not Validated); GEPS01055636.1|:3-1079(-) (Not Validated); GEPS01055640.1|:69-1280(-), GEPS01055643.1|:2-385(-) (Not Validated); GEPS01055640.1|:69-1280(-), GEPS01055645.1|:833-…	1	0	LPLQDVYK	NH2-LPLQDVYK-COOH	127; 82; 151; 82; 248; 248; 98; 169; 239; 156; 86	LR; LR; LR; LR; LR; LR; LR; LR; LR; LR; LR	IG; IG; IG; IG; IG; IG; IS; IG; IG; IG; IG				3	3	100	Confident
115	GEPS01035518.1|:1418-2158(-)	GEPS01035518.1|:1418-2158(-) (Doubtful)	1	1	YLAEVATGEAR	NH2-YLAEVATGEAR-COOH	129	YR	AG				3	3	100	Confident
116	GEPS01012404.1|:27-827(-)	GEPS01012404.1|:27-827(-) (Doubtful)	1	1	GVPIIITSDAR	NH2-GVPIIITSDAR-COOH	135	PK	TI				1	2	93.3333	Doubtful
117	P13645 SWISS-PROT:P13645 Tax_Id=9606 Gene_Symbol=KRT10 Keratin, type I cytoskeletal 10	P13645 SWISS-PROT:P13645 Tax_Id=9606 Gene_Symbol=KRT10 Keratin, type I cytoskeletal 10 (Doubtful)	1	1	YENEVALR	NH2-YENEVALR-COOH	238	LK	QS				1	1	100	Confident
118	GEPS01030296.1|:56-799(+)	GEPS01030296.1|:56-799(+) (Doubtful)	1	1	GDFLSDYSDSDK	NH2-GDFLSDYSDSDK-COOH	217	GL	MF				3	3	86.6667	Doubtful
119	P04264 SWISS-PROT:P04264 Tax_Id=9606 Gene_Symbol=KRT1 Keratin, type II cytoskeletal 1	P04264 SWISS-PROT:P04264 Tax_Id=9606 Gene_Symbol=KRT1 Keratin, type II cytoskeletal 1 (Doubtful)	1	1	QISNLQQSISDAEQR	pyro-QISNLQQSISDAEQR-COOH	418	KK	GE	Pyrolidone from Q (1)			3	3	100	Confident
120	P00761 SWISS-PROT:P00761|TRYP_PIG Trypsin - Sus scrofa (Pig).	P00761 SWISS-PROT:P00761|TRYP_PIG Trypsin - Sus scrofa (Pig). (Doubtful)	1	1	NIDVLEGNEQFINAAK	NH2-NIDVLEGNEQFINAAK-COOH	62	EH	II				2	2	93.3333	Doubtful
121	P35908 SWISS-PROT:P35908 Tax_Id=9606 Gene_Symbol=KRT2 Keratin, type II cytoskeletal 2 epidermal	P35908 SWISS-PROT:P35908 Tax_Id=9606 Gene_Symbol=KRT2 Keratin, type II cytoskeletal 2 epidermal (Doubtful)	1	1	TAAENDFVTLK	NH2-TAAENDFVTLK-COOH	282	KR	KD				3	3	100	Confident
122	GEPS01055219.1|:1029-1835(-); GEPS01055220.1|:1148-1969(-); GEPS01055221.1|:1126-1947(-); GEPS01055222.1|:1007-1813(-); GEPS01055223.1|:1095-1922(-); GEPS01055225.1|:1117-1944(-)	GEPS01055219.1|:1029-1835(-), GEPS01055220.1|:1148-1969(-), GEPS01055221.1|:1126-1947(-), GEPS01055222.1|:1007-1813(-), GEPS01055223.1|:1095-1922(-), GEPS01055225.1|:1117-1944(-) (Doubtful); GEPS01055219.1|:1029-1835(-), GEPS01055222.1|:1007-1813(-) (Not Validated)	1	0	LVILETAGEVSDWAAR	NH2-LVILETAGEVSDWAAR-COOH	3; 3; 3; 3; 3; 3	MR; MR; MR; MR; MR; MR	YI; YI; YI; YI; YI; YI				1	1	100	Confident
123	GEPS01030296.1|:56-799(+)	GEPS01030296.1|:56-799(+) (Doubtful)	1	1	DALVAEVDTIPDADAHLK	NH2-DALVAEVDTIPDADAHLK-COOH	134	NF	AD				5	5	100	Confident
124	GEPS01060173.1|:1-10512(+)	GEPS01060173.1|:1-10512(+) (Doubtful)	1	1	VGFETAEFVFHR	NH2-VGFETAEFVFHR-COOH	2939	HR	NQ				3	3	100	Confident
125	GEPS01030296.1|:56-799(+)	GEPS01030296.1|:56-799(+) (Doubtful)	1	1	EFDNVNFDALVAEVDTIPDADAHLK	NH2-EFDNVNFDALVAEVDTIPDADAHLK-COOH	127	MD	AD				3	3	100	Confident
126	P35908 SWISS-PROT:P35908 Tax_Id=9606 Gene_Symbol=KRT2 Keratin, type II cytoskeletal 2 epidermal	P35908 SWISS-PROT:P35908 Tax_Id=9606 Gene_Symbol=KRT2 Keratin, type II cytoskeletal 2 epidermal (Doubtful)	1	1	TSQNSELNNMQDLVEDYKK	NH2-TSQNSELNNMQDLVEDYKK-COOH	254	ER	KY				3	3	100	Confident
127	GEPS01058494.1|:3-5090(-)	GEPS01058494.1|:3-5090(-) (Doubtful)	1	1	GLLTFNAEEKPWAINFYK	NH2-GLLTFNAEEKPWAINFYK-COOH	105	EN	SI				3	3	100	Confident
128	GEPS01030296.1|:56-799(+)	GEPS01030296.1|:56-799(+) (Doubtful)	1	1	QLGGLGDFLSDYSDSDK	NH2-QLGGLGDFLSDYSDSDK-COOH	212	QF	MF				6	6	100	Confident
129	GEPS01060178.1|:3-998(-)	GEPS01060178.1|:3-998(-) (Doubtful)	1	1	IVTVGIGEDR	NH2-IVTVGIGEDR-COOH	167	SR	EI				3	3	100	Confident
130	GEPS01035623.1|:561-1340(-)	GEPS01035623.1|:561-1340(-) (Doubtful)	1	1	LDFLASDRDR	NH2-LDFLASDRDR-COOH	230	GR	VT				6	6	100	Confident
131	GEPS01032638.1|:161-925(+)	GEPS01032638.1|:161-925(+) (Doubtful)	1	1	VFQVEYAQK	NH2-VFQVEYAQK-COOH	21	GR	AV				3	3	100	Confident
132	GEPS01048855.1|:2-304(+)	GEPS01048855.1|:2-304(+) (Doubtful)	1	1	AYTAQMTQTPGNFK	NH2-AYTAQM<ox>TQTPGNFK-COOH	62	QK	MD	Oxidation of M (6)		Oxidation of M (6: Very Confident)	3	3	100	Confident
133	GEPS01030296.1|:56-799(+)	GEPS01030296.1|:56-799(+) (Doubtful)	1	1	GLGDFLSDYSDSDK	NH2-GLGDFLSDYSDSDK-COOH	215	LG	MF				3	3	100	Confident
134	GEPS01030296.1|:56-799(+)	GEPS01030296.1|:56-799(+) (Doubtful)	1	1	GAQTYFTEDTVR	NH2-GAQTYFTEDTVR-COOH	91	DQ	YL				3	3	86.6667	Doubtful
135	GEPS01059142.1|:104-2128(-)	GEPS01059142.1|:104-2128(-) (Doubtful)	1	1	KGELFFWVHHQLTAR	NH2-KGELFFWVHHQLTAR-COOH	241	DR	FD				9	9	100	Confident
136	P02768-1 SWISS-PROT:P02768-1 Tax_Id=9606 Gene_Symbol=ALB Isoform 1 of Serum albumin precursor	P02768-1 SWISS-PROT:P02768-1 Tax_Id=9606 Gene_Symbol=ALB Isoform 1 of Serum albumin precursor (Doubtful)	1	1	AVMDDFAAFVEK	NH2-AVMDDFAAFVEK-COOH	570	LK	CC				3	3	100	Confident
137	P07477 SWISS-PROT:P07477 Tax_Id=9606 Gene_Symbol=PRSS1 Trypsin-1 precursor	P07477 SWISS-PROT:P07477 Tax_Id=9606 Gene_Symbol=PRSS1 Trypsin-1 precursor (Doubtful)	1	1	LGEHNIEVLEGNEQFINAAK	NH2-LGEHNIEVLEGNEQFINAAK-COOH	73	VR	II				4	6	100	Confident
138	P35527 SWISS-PROT:P35527 Tax_Id=9606 Gene_Symbol=KRT9 Keratin, type I cytoskeletal 9	P35527 SWISS-PROT:P35527 Tax_Id=9606 Gene_Symbol=KRT9 Keratin, type I cytoskeletal 9 (Doubtful)	1	1	STMQELNSR	NH2-STMQELNSR-COOH	155	EK	LA				2	2	100	Confident
139	GEPS01038602.1|:205-972(+)	GEPS01038602.1|:205-972(+) (Doubtful)	1	1	IVELEEELR	NH2-IVELEEELR-COOH	190	SK	VV				3	3	100	Confident
140	GEPS01040334.1|:213-941(+)	GEPS01040334.1|:213-941(+) (Doubtful)	1	1	TGGNHGDFDADMAHYLEEK	NH2-TGGNHGDFDADMAHYLEEK-COOH	187	KR	LE				9	9	100	Confident
141	GEPS01052512.1|:800-3496(-); GEPS01052513.1|:800-2284(-)	GEPS01052512.1|:800-3496(-) (Not Validated); GEPS01052512.1|:800-3496(-), GEPS01052513.1|:800-2284(-) (Doubtful)	1	0	AAAAKEAEASSR	NH2-AAAAKEAEASSR-COOH	643; 239	KK; KK	RK; RK				1	3	93.3333	Doubtful
142	GEPS01040334.1|:213-941(+)	GEPS01040334.1|:213-941(+) (Doubtful)	1	1	HWNLGIDALK	NH2-HWNLGIDALK-COOH	85	DR	KY				3	3	100	Confident
143	GEPS01060173.1|:1-10512(+)	GEPS01060173.1|:1-10512(+) (Doubtful)	1	1	TVSVHIDVDR	NH2-TVSVHIDVDR-COOH	2985	PR	SG				1	1	100	Confident
144	P35527 SWISS-PROT:P35527 Tax_Id=9606 Gene_Symbol=KRT9 Keratin, type I cytoskeletal 9	P35527 SWISS-PROT:P35527 Tax_Id=9606 Gene_Symbol=KRT9 Keratin, type I cytoskeletal 9 (Doubtful)	1	1	DIENQYETQITQIEHEVSSSGQEVQSSAK	NH2-DIENQYETQITQIEHEVSSSGQEVQSSAK-COOH	340	RK	EV				2	2	100	Confident
145	GEPS01058494.1|:3-5090(-)	GEPS01058494.1|:3-5090(-) (Doubtful)	1	1	TTYTQHKLIGVAAAQR	NH2-TTYTQHKLIGVAAAQR-COOH	163	CR	EL				3	3	100	Confident
146	GEPS01059958.1|:3-581(-)	GEPS01059958.1|:3-581(-) (Doubtful)	1	1	LGTGIVLPPLYEVTPH	NH2-LGTGIVLPPLYEVTPH-COOH	14	SK	MF				3	3	86.6667	Doubtful
147	GEPS01030296.1|:56-799(+)	GEPS01030296.1|:56-799(+) (Doubtful)	1	1	SSDQGAQTYFTEDTVR	NH2-SSDQGAQTYFTEDTVR-COOH	87	SI	YL				1	2	100	Confident
148	GEPS01050968.1|:92-1477(+); GEPS01050969.1|:92-1477(+)	GEPS01050968.1|:92-1477(+), GEPS01050969.1|:92-1477(+) (Doubtful)	1	1	SVEMHHESLAEANPGDNVGFNVK	NH2-SVEMHHESLAEANPGDNVGFNVK-COOH	291; 291	VK; VK	NV; NV				2	2	100	Confident
149	GEPS01060173.1|:1-10512(+)	GEPS01060173.1|:1-10512(+) (Doubtful)	1	1	GSIDAVINNSFR	NH2-GSIDAVINNSFR-COOH	2969	TR	EI				3	3	100	Confident
150	GEPS01040334.1|:213-941(+)	GEPS01040334.1|:213-941(+) (Doubtful)	1	1	SLTYLFTGNAFGDQSVQR	NH2-SLTYLFTGNAFGDQSVQR-COOH	54	DK	PG				3	3	100	Confident
151	P35527 SWISS-PROT:P35527 Tax_Id=9606 Gene_Symbol=KRT9 Keratin, type I cytoskeletal 9	P35527 SWISS-PROT:P35527 Tax_Id=9606 Gene_Symbol=KRT9 Keratin, type I cytoskeletal 9 (Doubtful)	1	1	IQDWYDKK	NH2-IQDWYDKK-COOH	185	NK	GP				3	3	100	Confident
152	P13645 SWISS-PROT:P13645 Tax_Id=9606 Gene_Symbol=KRT10 Keratin, type I cytoskeletal 10	P13645 SWISS-PROT:P13645 Tax_Id=9606 Gene_Symbol=KRT10 Keratin, type I cytoskeletal 10 (Doubtful)	1	1	SQYEQLAEQNR	NH2-SQYEQLAEQNR-COOH	323	MR	KD				3	3	100	Confident
153	GEPS01048854.1|:137-1651(-)	GEPS01048854.1|:137-1651(-) (Doubtful)	1	1	FHMDFTGSQK	NH2-FHMDFTGSQK-COOH	17	GK	NP				3	3	100	Confident
154	GEPS01059958.1|:3-581(-)	GEPS01059958.1|:3-581(-) (Doubtful)	1	1	AYTAQMTQTPGTFK	NH2-AYTAQMTQTPGTFK-COOH	40	QK	MD				3	3	100	Confident
155	GEPS01058494.1|:3-5090(-)	GEPS01058494.1|:3-5090(-) (Doubtful)	1	1	QFAVSELK	NH2-QFAVSELK-COOH	41	KR	AN				6	6	100	Confident
156	GEPS01030296.1|:56-799(+)	GEPS01030296.1|:56-799(+) (Doubtful)	1	1	PMHDIAYPFTPALLR	NH2-PMHDIAYPFTPALLR-COOH	169	CL	WS				2	2	86.6667	Doubtful
157	GEPS01035518.1|:1418-2158(-)	GEPS01035518.1|:1418-2158(-) (Doubtful)	1	1	SEMQPTHPIR	NH2-SEMQPTHPIR-COOH	159	AR	LG				5	5	100	Confident
158	P35527 SWISS-PROT:P35527 Tax_Id=9606 Gene_Symbol=KRT9 Keratin, type I cytoskeletal 9	P35527 SWISS-PROT:P35527 Tax_Id=9606 Gene_Symbol=KRT9 Keratin, type I cytoskeletal 9 (Doubtful)	1	1	QGVDADINGLR	NH2-QGVDADINGLR-COOH	251	LR	QV				3	3	100	Confident
159	P00761 SWISS-PROT:P00761|TRYP_PIG Trypsin - Sus scrofa (Pig).; P07477 SWISS-PROT:P07477 Tax_Id=9606 Gene_Symbol=PRSS1 Trypsin-1 precursor	P00761 SWISS-PROT:P00761|TRYP_PIG Trypsin - Sus scrofa (Pig). (Doubtful); P07477 SWISS-PROT:P07477 Tax_Id=9606 Gene_Symbol=PRSS1 Trypsin-1 precursor (Doubtful)	2	0	NKPGVYTK	NH2-NKPGVYTK-COOH	209; 224	QK; QK	VC; VY				3	3	100	Confident
160	P04264 SWISS-PROT:P04264 Tax_Id=9606 Gene_Symbol=KRT1 Keratin, type II cytoskeletal 1	P04264 SWISS-PROT:P04264 Tax_Id=9606 Gene_Symbol=KRT1 Keratin, type II cytoskeletal 1 (Doubtful)	1	1	LNDLEDALQQAK	NH2-LNDLEDALQQAK-COOH	444	NK	ED				3	3	100	Confident
161	GEPS01043475.1|:651-1523(-)	GEPS01043475.1|:651-1523(-) (Doubtful)	1	1	AFFNVINWDNVAER	NH2-AFFNVINWDNVAER-COOH	267	VK	YA				3	3	100	Confident
162	P00761 SWISS-PROT:P00761|TRYP_PIG Trypsin - Sus scrofa (Pig).	P00761 SWISS-PROT:P00761|TRYP_PIG Trypsin - Sus scrofa (Pig). (Doubtful)	1	1	IITHPNFNGNTLDNDIMLIK	NH2-IITHPNFNGNTLDNDIM<ox>LIK-COOH	78	AK	LS	Oxidation of M (17)		Oxidation of M (17: Very Confident)	54	54	100	Confident
163	GEPS01040334.1|:213-941(+)	GEPS01040334.1|:213-941(+) (Doubtful)	1	1	VLKEESDR	NH2-VLKEESDR-COOH	77	AK	HW				3	3	100	Confident
164	GEPS01030296.1|:56-799(+)	GEPS01030296.1|:56-799(+) (Doubtful)	1	1	FDALVAEVDTIPDADAHLK	NH2-FDALVAEVDTIPDADAHLK-COOH	133	VN	AD				6	6	100	Confident
165	GEPS01059142.1|:104-2128(-)	GEPS01059142.1|:104-2128(-) (Doubtful)	1	1	LNHEDFSFNIGVK	NH2-LNHEDFSFNIGVK-COOH	480	SR	AN				3	3	100	Confident
166	GEPS01030296.1|:56-799(+)	GEPS01030296.1|:56-799(+) (Doubtful)	1	1	IAYPFTPALLR	NH2-IAYPFTPALLR-COOH	173	HD	WS				3	3	99.6805	Doubtful
167	GEPS01059995.1|:2808-3503(-)	GEPS01059995.1|:2808-3503(-) (Doubtful)	1	1	LTDGTQLFVVDGLLFSHEEDVK	NH2-LTDGTQLFVVDGLLFSHEEDVK-COOH	173	QR	QA				1	1	100	Confident
168	GEPS01043475.1|:651-1523(-)	GEPS01043475.1|:651-1523(-) (Doubtful)	1	1	HHQGYINNLK	NH2-HHQGYINNLK-COOH	115	TK	AA				1	1	100	Confident
169	GEPS01040334.1|:213-941(+)	GEPS01040334.1|:213-941(+) (Doubtful)	1	1	TTVVQVNDLHR	NH2-TTVVQVNDLHR-COOH	171	CK	MS				6	6	100	Confident
170	GEPS01035518.1|:1418-2158(-)	GEPS01035518.1|:1418-2158(-) (Doubtful)	1	1	YDDMAAAMK	NH2-YDDMAAAMK-COOH	20	ER	QV				3	3	100	Confident
171	GEPS01030296.1|:56-799(+)	GEPS01030296.1|:56-799(+) (Doubtful)	1	1	TYFTEDTVR	NH2-TYFTEDTVR-COOH	94	AQ	YL				3	3	86.6667	Doubtful
172	GEPS01043475.1|:651-1523(-)	GEPS01043475.1|:651-1523(-) (Doubtful)	1	1	DQFSAASVAVK	NH2-DQFSAASVAVK-COOH	197	FK	GS				3	3	100	Confident
173	P02768-1 SWISS-PROT:P02768-1 Tax_Id=9606 Gene_Symbol=ALB Isoform 1 of Serum albumin precursor	P02768-1 SWISS-PROT:P02768-1 Tax_Id=9606 Gene_Symbol=ALB Isoform 1 of Serum albumin precursor (Doubtful)	1	1	FKDLGEENFK	NH2-FKDLGEENFK-COOH	35	HR	AL				4	4	100	Confident
174	GEPS01030296.1|:56-799(+)	GEPS01030296.1|:56-799(+) (Doubtful)	1	1	GDQFQLGGLGDFLSDYSDSDKMFAIVWAR	NH2-GDQFQLGGLGDFLSDYSDSDKM<ox>FAIVWAR-COOH	208	AR	NV	Oxidation of M (22)		Oxidation of M (22: Very Confident)	2	2	100	Confident
175	GEPS01030296.1|:56-799(+)	GEPS01030296.1|:56-799(+) (Doubtful)	1	1	AYNEHLQATK	NH2-AYNEHLQATK-COOH	52	VR	AT				43	43	100	Confident
176	GEPS01030296.1|:56-799(+)	GEPS01030296.1|:56-799(+) (Doubtful)	1	1	YNEHLQATK	NH2-YNEHLQATK-COOH	53	RA	AT				6	6	100	Confident
177	GEPS01048854.1|:137-1651(-)	GEPS01048854.1|:137-1651(-) (Doubtful)	1	1	MEVINNDSVEK	NH2-MEVINNDSVEK-COOH	315	LK	HG				1	1	100	Confident
178	GEPS01035518.1|:1418-2158(-)	GEPS01035518.1|:1418-2158(-) (Doubtful)	1	1	AGVVEDSQK	NH2-AGVVEDSQK-COOH	140	AR	SY				2	2	100	Confident
179	GEPS01050564.1|:2-943(+)	GEPS01050564.1|:2-943(+) (Doubtful)	1	1	EQWEALQSLR	NH2-EQWEALQSLR-COOH	103	AK	FH				3	3	100	Confident
180	GEPS01045182.1|:1123-1914(-)	GEPS01045182.1|:1123-1914(-) (Doubtful)	1	1	FLGGMGVPDSVK	NH2-FLGGMGVPDSVK-COOH	52	NK	VC				3	3	100	Confident
181	GEPS01058494.1|:3-5090(-)	GEPS01058494.1|:3-5090(-) (Doubtful)	1	1	SLGEYTNPGSSK	NH2-SLGEYTNPGSSK-COOH	194	RV	TT				3	3	93.3333	Doubtful
182	GEPS01040334.1|:213-941(+)	GEPS01040334.1|:213-941(+) (Doubtful)	1	1	KFSNLYTSLEK	NH2-KFSNLYTSLEK-COOH	215	MR	MS				6	6	100	Confident
183	GEPS01050564.1|:2-943(+)	GEPS01050564.1|:2-943(+) (Doubtful)	1	1	WPSEEVGGR	NH2-WPSEEVGGR-COOH	174	CR	CL				3	3	100	Confident
184	P02768-1 SWISS-PROT:P02768-1 Tax_Id=9606 Gene_Symbol=ALB Isoform 1 of Serum albumin precursor	P02768-1 SWISS-PROT:P02768-1 Tax_Id=9606 Gene_Symbol=ALB Isoform 1 of Serum albumin precursor (Doubtful)	1	1	LVNEVTEFAK	NH2-LVNEVTEFAK-COOH	66	VK	TC				3	3	100	Confident
185	GEPS01035623.1|:561-1340(-)	GEPS01035623.1|:561-1340(-) (Doubtful)	1	1	VTALLMANTIVGPDDFGLYE	NH2-VTALLMANTIVGPDDFGLYE-COOH	240	DR					2	2	100	Confident
186	GEPS01048854.1|:137-1651(-)	GEPS01048854.1|:137-1651(-) (Doubtful)	1	1	DFSVTVPDVPSFK	NH2-DFSVTVPDVPSFK-COOH	376	SR	SL				3	3	100	Confident
187	P04264 SWISS-PROT:P04264 Tax_Id=9606 Gene_Symbol=KRT1 Keratin, type II cytoskeletal 1	P04264 SWISS-PROT:P04264 Tax_Id=9606 Gene_Symbol=KRT1 Keratin, type II cytoskeletal 1 (Doubtful)	1	1	YEELQITAGR	NH2-YEELQITAGR-COOH	377	SK	HG				3	3	100	Confident
188	GEPS01058494.1|:3-5090(-)	GEPS01058494.1|:3-5090(-) (Doubtful)	1	1	NAEEKPWAINFYK	NH2-NAEEKPWAINFYK-COOH	110	TF	SI				3	3	100	Confident
189	GEPS01059142.1|:104-2128(-)	GEPS01059142.1|:104-2128(-) (Doubtful)	1	1	TPFATLIK	NH2-TPFATLIK-COOH	557	DR	EA				1	3	100	Confident
190	GEPS01050564.1|:2-943(+)	GEPS01050564.1|:2-943(+) (Doubtful)	1	1	QALDELEALK	NH2-QALDELEALK-COOH	124	LK	QQ				3	3	100	Confident
191	GEPS01040334.1|:213-941(+)	GEPS01040334.1|:213-941(+) (Doubtful)	1	1	TGGNHGDFDADMAHYLEEK	NH2-TGGNHGDFDADM<ox>AHYLEEK-COOH	187	KR	LE	Oxidation of M (12)		Oxidation of M (12: Very Confident)	3	3	100	Confident
192	GEPS01030296.1|:56-799(+)	GEPS01030296.1|:56-799(+) (Doubtful)	1	1	FQLGGLGDFLSDYSDSDK	NH2-FQLGGLGDFLSDYSDSDK-COOH	211	DQ	MF				3	3	100	Confident
193	P02535-1 SWISS-PROT:P02535-1 Tax_Id=10090 Gene_Symbol=Krt10 Isoform 1 of Keratin, type I cytoskeletal 10; P13645 SWISS-PROT:P13645 Tax_Id=9606 Gene_Symbol=KRT10 Keratin, type I cytoskeletal 10	P02535-1 SWISS-PROT:P02535-1 Tax_Id=10090 Gene_Symbol=Krt10 Isoform 1 of Keratin, type I cytoskeletal 10 (Not Validated); P13645 SWISS-PROT:P13645 Tax_Id=9606 Gene_Symbol=KRT10 Keratin, type I cytoskeletal 10 (Doubtful)	1	0	LENEIQTYR	NH2-LENEIQTYR-COOH	440; 442	TR; IR	SL; SL				3	3	100	Confident
194	GEPS01030296.1|:56-799(+)	GEPS01030296.1|:56-799(+) (Doubtful)	1	1	GGLGDFLSDYSDSDK	NH2-GGLGDFLSDYSDSDK-COOH	214	QL	MF				4	4	100	Confident
195	P04264 SWISS-PROT:P04264 Tax_Id=9606 Gene_Symbol=KRT1 Keratin, type II cytoskeletal 1; P50446 SWISS-PROT:P50446 Tax_Id=10090 Gene_Symbol=Krt6a Keratin, type II cytoskeletal 6A; Q5XQN5 SWISS-PROT:Q5XQN5 (Bos taurus) Keratin, type II cytoskeletal 5; Q8BGZ7 TREMBL:Q8BGZ7;Q99MH7 Tax_Id=10090 Gene_Symbol=Krt75 10 days neonate skin cDNA, RIKEN full-length enriched library, clone:4732475I03 product:CYTO…	P04264 SWISS-PROT:P04264 Tax_Id=9606 Gene_Symbol=KRT1 Keratin, type II cytoskeletal 1 (Doubtful); P13647 SWISS-PROT:P13647 Tax_Id=9606 Gene_Symbol=KRT5 Keratin, type II cytoskeletal 5, Q5XQN5 SWISS-PROT:Q5XQN5 (Bos taurus) Keratin, type II cytoskeletal 5 (Not Validated); P50446 SWISS-PROT:P50446 Tax_Id=10090 Gene_Symbol=Krt6a Keratin, type II cytoskeletal 6A (Not Validated); Q8BGZ7 TREMBL:Q8BGZ7;…	1	0	SLDLDSIIAEVK	NH2-SLDLDSIIAEVK-COOH	344; 316; 333; 314; 326	NR; NR; NR; NR; NR	AQ; AQ; AQ; AQ; AQ				3	3	100	Confident
196	GEPS01045182.1|:1123-1914(-)	GEPS01045182.1|:1123-1914(-) (Doubtful)	1	1	FPINHGPTSEENFLIDGASVLR	NH2-FPINHGPTSEENFLIDGASVLR-COOH	221	KK	DF				1	1	100	Confident
197	GEPS01012404.1|:27-827(-)	GEPS01012404.1|:27-827(-) (Doubtful)	1	1	ITEDEANYK	NH2-ITEDEANYK-COOH	114	HR	LC				1	1	100	Confident
198	GEPS01035623.1|:561-1340(-)	GEPS01035623.1|:561-1340(-) (Doubtful)	1	1	LDFLASDR	NH2-LDFLASDR-COOH	230	GR	DR				3	3	100	Confident
199	GEPS01030296.1|:56-799(+)	GEPS01030296.1|:56-799(+) (Doubtful)	1	1	NVLDEGSDFLW	NH2-NVLDEGSDFLW-COOH	237	AR					25	32	100	Confident
200	GEPS01030296.1|:56-799(+)	GEPS01030296.1|:56-799(+) (Doubtful)	1	1	DQFQLGGLGDFLSDYSDSDK	NH2-DQFQLGGLGDFLSDYSDSDK-COOH	209	RG	MF				3	3	100	Confident
201	GEPS01037834.1|:77-730(-); GEPS01037835.1|:77-730(-)	GEPS01037834.1|:77-730(-), GEPS01037835.1|:77-730(-) (Doubtful)	1	1	LVGPGLNK	NH2-LVGPGLNK-COOH	123; 123	PR; PR	AG; AG				2	2	100	Confident
202	GEPS01060178.1|:3-998(-)	GEPS01060178.1|:3-998(-) (Doubtful)	1	1	GSLISGDGTEPQEIADIELQMLGK	NH2-GSLISGDGTEPQEIADIELQMLGK-COOH	46	NK	RI				3	3	100	Confident
203	P35527 SWISS-PROT:P35527 Tax_Id=9606 Gene_Symbol=KRT9 Keratin, type I cytoskeletal 9	P35527 SWISS-PROT:P35527 Tax_Id=9606 Gene_Symbol=KRT9 Keratin, type I cytoskeletal 9 (Doubtful)	1	1	NYSPYYNTIDDLKDQIVDLTVGNNK	NH2-NYSPYYNTIDDLKDQIVDLTVGNNK-COOH	200	QK	TL				3	3	100	Confident
204	P35527 SWISS-PROT:P35527 Tax_Id=9606 Gene_Symbol=KRT9 Keratin, type I cytoskeletal 9	P35527 SWISS-PROT:P35527 Tax_Id=9606 Gene_Symbol=KRT9 Keratin, type I cytoskeletal 9 (Doubtful)	1	1	NHKEEMSQLTGQNSGDVNVEINVAPGK	NH2-NHKEEMSQLTGQNSGDVNVEINVAPGK-COOH	291	KK	DL				1	1	100	Confident
205	GEPS01058494.1|:3-5090(-)	GEPS01058494.1|:3-5090(-) (Doubtful)	1	1	ELFADHHVTR	pyro-ELFADHHVTR-COOH	179	QR	DV	Pyrolidone from E (1)			16	16	100	Confident
206	P35527 SWISS-PROT:P35527 Tax_Id=9606 Gene_Symbol=KRT9 Keratin, type I cytoskeletal 9	P35527 SWISS-PROT:P35527 Tax_Id=9606 Gene_Symbol=KRT9 Keratin, type I cytoskeletal 9 (Doubtful)	1	1	QVLDNLTMEK	NH2-QVLDNLTMEK-COOH	262	LR	SD				3	3	100	Confident
207	GEPS01030296.1|:56-799(+)	GEPS01030296.1|:56-799(+) (Doubtful)	1	1	ADFGASISSDQGAQTYFTEDTVR	NH2-ADFGASISSDQGAQTYFTEDTVR-COOH	80	SK	YL				392	392	100	Confident
208	P04264 SWISS-PROT:P04264 Tax_Id=9606 Gene_Symbol=KRT1 Keratin, type II cytoskeletal 1	P04264 SWISS-PROT:P04264 Tax_Id=9606 Gene_Symbol=KRT1 Keratin, type II cytoskeletal 1 (Doubtful)	1	1	THNLEPYFESFINNLR	NH2-THNLEPYFESFINNLR-COOH	224	TR	RR				7	8	100	Confident
209	ENSEMBL:ENSBTAP00000038253 (Bos taurus) 63 kDa protein; P04264 SWISS-PROT:P04264 Tax_Id=9606 Gene_Symbol=KRT1 Keratin, type II cytoskeletal 1	ENSEMBL:ENSBTAP00000038253 (Bos taurus) 63 kDa protein (Not Validated); P04264 SWISS-PROT:P04264 Tax_Id=9606 Gene_Symbol=KRT1 Keratin, type II cytoskeletal 1 (Doubtful)	1	0	TLLEGEESR	NH2-TLLEGEESR-COOH	480; 484	YR; YR	MS; MS				3	3	100	Confident
210	GEPS01048854.1|:137-1651(-)	GEPS01048854.1|:137-1651(-) (Doubtful)	1	1	GMEYVLAVAVTDGEADTQHDLLEK	NH2-GMEYVLAVAVTDGEADTQHDLLEK-COOH	428	SR	TE				1	1	100	Confident
211	GEPS01030296.1|:56-799(+)	GEPS01030296.1|:56-799(+) (Doubtful)	1	1	EVDTIPDADAHLK	NH2-EVDTIPDADAHLK-COOH	139	VA	AD				2	2	100	Confident
212	GEPS01059141.1|:299-1369(-)	GEPS01059141.1|:299-1369(-) (Doubtful)	1	1	EADEAVSSGSSLPSHNVR	NH2-EADEAVSSGSSLPSHNVR-COOH	246	VK	GC				4	4	100	Confident
213	GEPS01030296.1|:56-799(+)	GEPS01030296.1|:56-799(+) (Doubtful)	1	1	MFAIVWAR	NH2-MFAIVWAR-COOH	229	DK	NV				32	32	100	Confident
214	P02768-1 SWISS-PROT:P02768-1 Tax_Id=9606 Gene_Symbol=ALB Isoform 1 of Serum albumin precursor; P02769 SWISS-PROT:P02769 (Bos taurus) Bovine serum albumin precursor	P02768-1 SWISS-PROT:P02768-1 Tax_Id=9606 Gene_Symbol=ALB Isoform 1 of Serum albumin precursor (Doubtful); P02769 SWISS-PROT:P02769 (Bos taurus) Bovine serum albumin precursor (Not Validated)	1	0	FQNALLVR	NH2-FQNALLVR-COOH	427; 426	YK; YG	YT; YT				3	3	100	Confident
215	GEPS01059141.1|:299-1369(-)	GEPS01059141.1|:299-1369(-) (Doubtful)	1	1	TPFATLVK	NH2-TPFATLVK-COOH	238	DR	EA				2	2	100	Confident
216	GEPS01030296.1|:56-799(+)	GEPS01030296.1|:56-799(+) (Doubtful)	1	1	VNFDALVAEVDTIPDADAHLK	NH2-VNFDALVAEVDTIPDADAHLK-COOH	131	DN	AD				8	8	100	Confident
217	P04264 SWISS-PROT:P04264 Tax_Id=9606 Gene_Symbol=KRT1 Keratin, type II cytoskeletal 1	P04264 SWISS-PROT:P04264 Tax_Id=9606 Gene_Symbol=KRT1 Keratin, type II cytoskeletal 1 (Doubtful)	1	1	TNAENEFVTIK	NH2-TNAENEFVTIK-COOH	278	KR	KD				3	3	100	Confident
218	GEPS01060178.1|:3-998(-)	GEPS01060178.1|:3-998(-) (Doubtful)	1	1	SEIDSSLTTLPGLTIGIGK	NH2-SEIDSSLTTLPGLTIGIGK-COOH	143	LR	EG				3	3	100	Confident
219	P02768-1 SWISS-PROT:P02768-1 Tax_Id=9606 Gene_Symbol=ALB Isoform 1 of Serum albumin precursor	P02768-1 SWISS-PROT:P02768-1 Tax_Id=9606 Gene_Symbol=ALB Isoform 1 of Serum albumin precursor (Doubtful)	1	1	AEFAEVSK	NH2-AEFAEVSK-COOH	250	PK	LV				3	3	100	Confident
220	P02768-1 SWISS-PROT:P02768-1 Tax_Id=9606 Gene_Symbol=ALB Isoform 1 of Serum albumin precursor	P02768-1 SWISS-PROT:P02768-1 Tax_Id=9606 Gene_Symbol=ALB Isoform 1 of Serum albumin precursor (Doubtful)	1	1	QTALVELVK	NH2-QTALVELVK-COOH	550	KK	HK				3	3	100	Confident
221	GEPS01057172.1|:2639-3469(-)	GEPS01057172.1|:2639-3469(-) (Doubtful)	1	1	LLGGQVINMTTVPEVVLAR	NH2-LLGGQVINMTTVPEVVLAR-COOH	182	FR	EL				3	3	100	Confident
222	P35908 SWISS-PROT:P35908 Tax_Id=9606 Gene_Symbol=KRT2 Keratin, type II cytoskeletal 2 epidermal	P35908 SWISS-PROT:P35908 Tax_Id=9606 Gene_Symbol=KRT2 Keratin, type II cytoskeletal 2 epidermal (Doubtful)	1	1	YLDGLTAER	NH2-YLDGLTAER-COOH	245	KR	TS				3	3	100	Confident
223	P35527 SWISS-PROT:P35527 Tax_Id=9606 Gene_Symbol=KRT9 Keratin, type I cytoskeletal 9	P35527 SWISS-PROT:P35527 Tax_Id=9606 Gene_Symbol=KRT9 Keratin, type I cytoskeletal 9 (Doubtful)	1	1	QVLDNLTMEK	NH2-QVLDNLTM<ox>EK-COOH	262	LR	SD	Oxidation of M (8)		Oxidation of M (8: Very Confident)	1	1	100	Confident
224	GEPS01035623.1|:561-1340(-)	GEPS01035623.1|:561-1340(-) (Doubtful)	1	1	GIQEQAGYFR	NH2-GIQEQAGYFR-COOH	118	AK	CV				6	6	100	Confident
225	P35527 SWISS-PROT:P35527 Tax_Id=9606 Gene_Symbol=KRT9 Keratin, type I cytoskeletal 9	P35527 SWISS-PROT:P35527 Tax_Id=9606 Gene_Symbol=KRT9 Keratin, type I cytoskeletal 9 (Doubtful)	1	1	TLLDIDNTR	NH2-TLLDIDNTR-COOH	225	NK	MT				3	3	100	Confident
226	P35527 SWISS-PROT:P35527 Tax_Id=9606 Gene_Symbol=KRT9 Keratin, type I cytoskeletal 9	P35527 SWISS-PROT:P35527 Tax_Id=9606 Gene_Symbol=KRT9 Keratin, type I cytoskeletal 9 (Doubtful)	1	1	SDLEMQYETLQEELMALK	NH2-SDLEMQYETLQEELMALK-COOH	272	EK	KN				3	3	100	Confident
227	GEPS01058494.1|:3-5090(-)	GEPS01058494.1|:3-5090(-) (Doubtful)	1	1	RQFAVSELK	NH2-RQFAVSELK-COOH	40	NK	AN				3	3	100	Confident
228	GEPS01038602.1|:205-972(+)	GEPS01038602.1|:205-972(+) (Doubtful)	1	1	LAEASQAADESER	NH2-LAEASQAADESER-COOH	113	TK	MR				1	1	100	Confident
229	GEPS01030296.1|:56-799(+)	GEPS01030296.1|:56-799(+) (Doubtful)	1	1	AQTYFTEDTVR	NH2-AQTYFTEDTVR-COOH	92	QG	YL				3	3	93.3333	Doubtful
230	P35908 SWISS-PROT:P35908 Tax_Id=9606 Gene_Symbol=KRT2 Keratin, type II cytoskeletal 2 epidermal	P35908 SWISS-PROT:P35908 Tax_Id=9606 Gene_Symbol=KRT2 Keratin, type II cytoskeletal 2 epidermal (Doubtful)	1	1	SLVGLGGTK	NH2-SLVGLGGTK-COOH	62	SR	SI				3	3	100	Confident
231	GEPS01030296.1|:56-799(+)	GEPS01030296.1|:56-799(+) (Doubtful)	1	1	YPFTPALLR	NH2-YPFTPALLR-COOH	175	IA	WS				3	3	93.3333	Doubtful
232	P04264 SWISS-PROT:P04264 Tax_Id=9606 Gene_Symbol=KRT1 Keratin, type II cytoskeletal 1	P04264 SWISS-PROT:P04264 Tax_Id=9606 Gene_Symbol=KRT1 Keratin, type II cytoskeletal 1 (Doubtful)	1	1	DVDGAYMTK	NH2-DVDGAYMTK-COOH	290	KK	VD				3	3	100	Confident
233	GEPS01030296.1|:56-799(+)	GEPS01030296.1|:56-799(+) (Doubtful)	1	1	RVTANDQLYALYNR	NH2-RVTANDQLYALYNR-COOH	24	TA	QK				6	6	100	Confident
234	GEPS01048853.1|:1-567(-)	GEPS01048853.1|:1-567(-) (Doubtful)	1	1	AVEALVHELEDGR	NH2-AVEALVHELEDGR-COOH	95	GK	LL				3	3	100	Confident
235	GEPS01060173.1|:1-10512(+)	GEPS01060173.1|:1-10512(+) (Doubtful)	1	1	TDGQGFLIEYK	NH2-TDGQGFLIEYK-COOH	2713	EK	RG				3	3	100	Confident
236	P35908 SWISS-PROT:P35908 Tax_Id=9606 Gene_Symbol=KRT2 Keratin, type II cytoskeletal 2 epidermal	P35908 SWISS-PROT:P35908 Tax_Id=9606 Gene_Symbol=KRT2 Keratin, type II cytoskeletal 2 epidermal (Doubtful)	1	1	NVQDAIADAEQR	NH2-NVQDAIADAEQR-COOH	425	CK	GE				3	3	100	Confident
237	P02768-1 SWISS-PROT:P02768-1 Tax_Id=9606 Gene_Symbol=ALB Isoform 1 of Serum albumin precursor	P02768-1 SWISS-PROT:P02768-1 Tax_Id=9606 Gene_Symbol=ALB Isoform 1 of Serum albumin precursor (Doubtful)	1	1	DVFLGMFLYEYAR	NH2-DVFLGMFLYEYAR-COOH	348	AK	RH				3	3	100	Confident
238	GEPS01035623.1|:561-1340(-)	GEPS01035623.1|:561-1340(-) (Doubtful)	1	1	FHQPDVSSNNGVENLFALA	NH2-FHQPDVSSNNGVENLFALA-COOH	79	TK	RK				3	3	100	Confident
239	GEPS01030296.1|:56-799(+)	GEPS01030296.1|:56-799(+) (Doubtful)	1	1	AMAICLPMHDIAYPFTPALLR	NH2-AMAIC<cmm>LPM<ox>HDIAYPFTPALLR-COOH	163	CK	WS	Oxidation of M (8)	Carbamidomethylation of C (5)	Oxidation of M (8: Very Confident)	1	1	100	Confident
240	GEPS01057172.1|:2639-3469(-)	GEPS01057172.1|:2639-3469(-) (Doubtful)	1	1	DHSIQPSLVNYR	NH2-DHSIQPSLVNYR-COOH	58	GK	AN				4	4	100	Confident
241	P35527 SWISS-PROT:P35527 Tax_Id=9606 Gene_Symbol=KRT9 Keratin, type I cytoskeletal 9	P35527 SWISS-PROT:P35527 Tax_Id=9606 Gene_Symbol=KRT9 Keratin, type I cytoskeletal 9 (Doubtful)	1	1	QEYEQLIAK	NH2-QEYEQLIAK-COOH	328	MR	NR				3	3	100	Confident
242	GEPS01030296.1|:56-799(+)	GEPS01030296.1|:56-799(+) (Doubtful)	1	1	DEFDNVNFDALVAEVDTIPDADAHLK	NH2-DEFDNVNFDALVAEVDTIPDADAHLK-COOH	126	YM	AD				1	1	100	Confident
243	GEPS01043475.1|:651-1523(-)	GEPS01043475.1|:651-1523(-) (Doubtful)	1	1	KNQLANAASEAASIQQMAK	NH2-KNQLANAASEAASIQQMAK-COOH	28	IR	YV				1	1	100	Confident
244	GEPS01030296.1|:56-799(+)	GEPS01030296.1|:56-799(+) (Doubtful)	1	1	QGAQTYFTEDTVR	NH2-QGAQTYFTEDTVR-COOH	90	SD	YL				3	3	100	Confident
245	GEPS01035518.1|:1418-2158(-)	GEPS01035518.1|:1418-2158(-) (Doubtful)	1	1	QVTETGVELSNEER	NH2-QVTETGVELSNEER-COOH	29	MK	NL				3	3	100	Confident
246	GEPS01060173.1|:1-10512(+)	GEPS01060173.1|:1-10512(+) (Doubtful)	1	1	RGDNFFNLNLSPGGR	NH2-RGDNFFNLNLSPGGR-COOH	2724	YK	SQ				1	1	100	Confident
247	GEPS01048854.1|:137-1651(-)	GEPS01048854.1|:137-1651(-) (Doubtful)	1	1	ILLGSPNIK	NH2-ILLGSPNIK-COOH	486	ER	YT				2	2	100	Confident
248	GEPS01040334.1|:213-941(+)	GEPS01040334.1|:213-941(+) (Doubtful)	1	1	MSNLGLAQHIFDK	NH2-MSNLGLAQHIFDK-COOH	226	EK	SL				6	6	100	Confident
249	GEPS01058494.1|:3-5090(-)	GEPS01058494.1|:3-5090(-) (Doubtful)	1	1	SIVSLFNIPPLK	NH2-SIVSLFNIPPLK-COOH	123	YK	EA				13	16	100	Confident
250	GEPS01011388.1|:117-758(+)	GEPS01011388.1|:117-758(+) (Doubtful)	1	1	GFTIHELR	NH2-GFTIHELR-COOH	74	GR	LA				2	2	100	Confident
251	P02768-1 SWISS-PROT:P02768-1 Tax_Id=9606 Gene_Symbol=ALB Isoform 1 of Serum albumin precursor	P02768-1 SWISS-PROT:P02768-1 Tax_Id=9606 Gene_Symbol=ALB Isoform 1 of Serum albumin precursor (Doubtful)	1	1	KQTALVELVK	NH2-KQTALVELVK-COOH	549	IK	HK				3	3	100	Confident
252	ENSEMBL:ENSBTAP00000038253 (Bos taurus) 63 kDa protein; P04264 SWISS-PROT:P04264 Tax_Id=9606 Gene_Symbol=KRT1 Keratin, type II cytoskeletal 1; Q3TTY5 SWISS-PROT:Q3TTY5 Tax_Id=10090 Gene_Symbol=Krt2 Keratin, type II cytoskeletal 2 epidermal	ENSEMBL:ENSBTAP00000038253 (Bos taurus) 63 kDa protein (Not Validated); P04264 SWISS-PROT:P04264 Tax_Id=9606 Gene_Symbol=KRT1 Keratin, type II cytoskeletal 1 (Doubtful); Q3TTY5 SWISS-PROT:Q3TTY5 Tax_Id=10090 Gene_Symbol=Krt2 Keratin, type II cytoskeletal 2 epidermal (Not Validated)	1	0	DYQELMNTK	NH2-DYQELMNTK-COOH	460; 464; 483	LR; LR; LR	LA; LA; LS				3	3	100	Confident
253	P13645 SWISS-PROT:P13645 Tax_Id=9606 Gene_Symbol=KRT10 Keratin, type I cytoskeletal 10; Q148H6 TREMBL:Q148H6 (Bos taurus) Hypothetical protein MGC139876; Q7Z3Y7 SWISS-PROT:Q7Z3Y7 Tax_Id=9606 Gene_Symbol=KRT28 Keratin 25D; Q7Z3Y8 SWISS-PROT:Q7Z3Y8 Tax_Id=9606 Gene_Symbol=KRT27 Keratin, type I cytoskeletal 27; Q7Z3Z0 SWISS-PROT:Q7Z3Z0 Tax_Id=9606 Gene_Symbol=KRT25 Keratin, type I cytoskeletal 25	P13645 SWISS-PROT:P13645 Tax_Id=9606 Gene_Symbol=KRT10 Keratin, type I cytoskeletal 10 (Doubtful); Q148H6 TREMBL:Q148H6 (Bos taurus) Hypothetical protein MGC139876, Q7Z3Y7 SWISS-PROT:Q7Z3Y7 Tax_Id=9606 Gene_Symbol=KRT28 Keratin 25D (Not Validated); Q148H6 TREMBL:Q148H6 (Bos taurus) Hypothetical protein MGC139876, Q7Z3Y8 SWISS-PROT:Q7Z3Y8 Tax_Id=9606 Gene_Symbol=KRT27 Keratin, type I cytoskeletal …	1	0	DAEAWFNEK	NH2-DAEAWFNEK-COOH	335; 276; 298; 274; 269	RK; RR; RK; RR; RR	SK; SA; SA; SA; SA				1	1	100	Confident
254	P02768-1 SWISS-PROT:P02768-1 Tax_Id=9606 Gene_Symbol=ALB Isoform 1 of Serum albumin precursor	P02768-1 SWISS-PROT:P02768-1 Tax_Id=9606 Gene_Symbol=ALB Isoform 1 of Serum albumin precursor (Doubtful)	1	1	LDELRDEGK	NH2-LDELRDEGK-COOH	206	PK	AS				1	1	100	Confident
255	P35527 SWISS-PROT:P35527 Tax_Id=9606 Gene_Symbol=KRT9 Keratin, type I cytoskeletal 9	P35527 SWISS-PROT:P35527 Tax_Id=9606 Gene_Symbol=KRT9 Keratin, type I cytoskeletal 9 (Doubtful)	1	1	HGVQELEIELQSQLSK	NH2-HGVQELEIELQSQLSK-COOH	375	LR	KA				5	5	100	Confident
256	P00761 SWISS-PROT:P00761|TRYP_PIG Trypsin - Sus scrofa (Pig).	P00761 SWISS-PROT:P00761|TRYP_PIG Trypsin - Sus scrofa (Pig). (Doubtful)	1	1	IITHPNFNGNTLDNDIMLIK	NH2-IITHPNFNGNTLDNDIMLIK-COOH	78	AK	LS				40	41	100	Confident
257	GEPS01030296.1|:56-799(+)	GEPS01030296.1|:56-799(+) (Doubtful)	1	1	AHVDEPSSK	NH2-AHVDEPSSK-COOH	71	SR	AD				17	17	100	Confident
258	GEPS01040334.1|:213-941(+)	GEPS01040334.1|:213-941(+) (Doubtful)	1	1	FSNLYTSLEK	NH2-FSNLYTSLEK-COOH	216	RK	MS				3	3	100	Confident
259	GEPS01030296.1|:56-799(+)	GEPS01030296.1|:56-799(+) (Doubtful)	1	1	ISSDQGAQTYFTEDTVR	NH2-ISSDQGAQTYFTEDTVR-COOH	86	AS	YL				6	6	100	Confident
260	GEPS01059958.1|:3-581(-)	GEPS01059958.1|:3-581(-) (Doubtful)	1	1	LSNHLDLVDELYWDRPIK	NH2-LSNHLDLVDELYWDRPIK-COOH	122	ER	EG				3	3	100	Confident
261	P00761 SWISS-PROT:P00761|TRYP_PIG Trypsin - Sus scrofa (Pig).	P00761 SWISS-PROT:P00761|TRYP_PIG Trypsin - Sus scrofa (Pig). (Doubtful)	1	1	LGEHNIDVLEGNEQFINAAK	NH2-LGEHNIDVLEGNEQFINAAK-COOH	58	VR	II				43	49	100	Confident
262	P00761 SWISS-PROT:P00761|TRYP_PIG Trypsin - Sus scrofa (Pig).	P00761 SWISS-PROT:P00761|TRYP_PIG Trypsin - Sus scrofa (Pig). (Doubtful)	1	1	LGEHNIDVLEGNEQFIN	NH2-LGEHNIDVLEGNEQFIN-COOH	58	VR	AA				7	8	100	Confident
263	GEPS01048854.1|:137-1651(-)	GEPS01048854.1|:137-1651(-) (Doubtful)	1	1	GTPLGLEEFDR	NH2-GTPLGLEEFDR-COOH	401	AK	SC				3	3	100	Confident
264	GEPS01030296.1|:56-799(+)	GEPS01030296.1|:56-799(+) (Doubtful)	1	1	HDIAYPFTPALLR	NH2-HDIAYPFTPALLR-COOH	171	PM	WS				3	3	86.6667	Doubtful
265	P00761 SWISS-PROT:P00761|TRYP_PIG Trypsin - Sus scrofa (Pig).	P00761 SWISS-PROT:P00761|TRYP_PIG Trypsin - Sus scrofa (Pig). (Doubtful)	1	1	LGEHNIDVLEGNEQ	NH2-LGEHNIDVLEGNEQ-COOH	58	VR	FI				3	3	99.6825	Doubtful
266	GEPS01030296.1|:56-799(+)	GEPS01030296.1|:56-799(+) (Doubtful)	1	1	LVAEVDTIPDADAHLK	NH2-LVAEVDTIPDADAHLK-COOH	136	DA	AD				4	4	86.6667	Doubtful
267	GEPS01043475.1|:651-1523(-)	GEPS01043475.1|:651-1523(-) (Doubtful)	1	1	LNEAQANGDIAASNALVPALK	NH2-LNEAQANGDIAASNALVPALK-COOH	130	AK	FN				7	7	100	Confident
268	GEPS01058494.1|:3-5090(-)	GEPS01058494.1|:3-5090(-) (Doubtful)	1	1	FADHHVTR	NH2-FADHHVTR-COOH	181	EL	DV				6	6	100	Confident
269	GEPS01016300.1|:1-735(-); GEPS01022368.1|:3-644(-); GEPS01022369.1|:2-370(-); GEPS01027468.1|:2-706(+); GEPS01030137.1|:3-320(-); GEPS01035518.1|:1418-2158(-); GEPS01054352.1|:23-451(+); GEPS01054353.1|:3-725(+); GEPS01054354.1|:11-595(+); GEPS01054355.1|:1-357(+); GEPS01054356.1|:27-758(+); GEPS01054357.1|:3-632(+)	GEPS01016300.1|:1-735(-) (Not Validated); GEPS01022368.1|:3-644(-) (Not Validated); GEPS01022369.1|:2-370(-) (Not Validated); GEPS01030137.1|:3-320(-) (Not Validated); GEPS01035518.1|:1418-2158(-) (Doubtful); GEPS01054353.1|:3-725(+) (Not Validated); GEPS01054356.1|:27-758(+) (Not Validated)	1	0	NLLSVAYK	NH2-NLLSVAYK-COOH	43; 41; 42; 39; 21; 43; 21; 43; 45; 47; 46; 13	ER; DR; DR; ER; ER; ER; ER; ER; ER; ER; ER; ER	NV; NS; NA; NT; NT; NV; NT; NT; NT; NT; NT; NT				3	3	100	Confident
270	GEPS01030296.1|:56-799(+)	GEPS01030296.1|:56-799(+) (Doubtful)	1	1	AMAICLPMHDIAYPFTPALLR	NH2-AM<ox>AIC<cmm>LPM<ox>HDIAYPFTPALLR-COOH	163	CK	WS	Oxidation of M (8, 2)	Carbamidomethylation of C (5)	Oxidation of M (2: Very Confident, 8: Very Confident)	1	1	93.3333	Doubtful
271	P00761 SWISS-PROT:P00761|TRYP_PIG Trypsin - Sus scrofa (Pig).	P00761 SWISS-PROT:P00761|TRYP_PIG Trypsin - Sus scrofa (Pig). (Doubtful)	1	1	GNTLDNDIMLIK	NH2-GNTLDNDIMLIK-COOH	86	FN	LS				3	3	93.3333	Doubtful
272	GEPS01058494.1|:3-5090(-)	GEPS01058494.1|:3-5090(-) (Doubtful)	1	1	VSLGEYTNPGSSK	NH2-VSLGEYTNPGSSK-COOH	193	QR	TT				14	14	100	Confident
273	GEPS01045182.1|:1123-1914(-)	GEPS01045182.1|:1123-1914(-) (Doubtful)	1	1	LDTHFIALVNVGDR	NH2-LDTHFIALVNVGDR-COOH	198	HK	LY				6	6	100	Confident
274	GEPS01040334.1|:213-941(+)	GEPS01040334.1|:213-941(+) (Doubtful)	1	1	HWNLGIDALKK	NH2-HWNLGIDALKK-COOH	85	DR	YL				3	3	100	Confident
275	GEPS01035518.1|:1418-2158(-)	GEPS01035518.1|:1418-2158(-) (Doubtful)	1	1	SYQEAFDIAR	NH2-SYQEAFDIAR-COOH	149	QK	SE				3	3	100	Confident
276	GEPS01035518.1|:1418-2158(-)	GEPS01035518.1|:1418-2158(-) (Doubtful)	1	1	QVTETGVELSNEER	pyro-QVTETGVELSNEER-COOH	29	MK	NL	Pyrolidone from Q (1)			3	3	100	Confident
277	GEPS01059141.1|:299-1369(-)	GEPS01059141.1|:299-1369(-) (Doubtful)	1	1	SSESSVTIPDR	NH2-SSESSVTIPDR-COOH	227	RK	TP				3	3	100	Confident
278	GEPS01043475.1|:651-1523(-)	GEPS01043475.1|:651-1523(-) (Doubtful)	1	1	DSYIAALEK	NH2-DSYIAALEK-COOH	5	EK	KL				3	3	100	Confident
279	P04264 SWISS-PROT:P04264 Tax_Id=9606 Gene_Symbol=KRT1 Keratin, type II cytoskeletal 1	P04264 SWISS-PROT:P04264 Tax_Id=9606 Gene_Symbol=KRT1 Keratin, type II cytoskeletal 1 (Doubtful)	1	1	SISISVAR	NH2-SISISVAR-COOH	75	SK	GG				3	3	93.3333	Doubtful
280	GEPS01060178.1|:3-998(-)	GEPS01060178.1|:3-998(-) (Doubtful)	1	1	LDSEFSTQER	NH2-LDSEFSTQER-COOH	104	VK	NG				3	3	100	Confident
281	GEPS01030296.1|:56-799(+)	GEPS01030296.1|:56-799(+) (Doubtful)	1	1	HVDEPSSK	NH2-HVDEPSSK-COOH	72	RA	AD				6	6	100	Confident
282	P02768-1 SWISS-PROT:P02768-1 Tax_Id=9606 Gene_Symbol=ALB Isoform 1 of Serum albumin precursor	P02768-1 SWISS-PROT:P02768-1 Tax_Id=9606 Gene_Symbol=ALB Isoform 1 of Serum albumin precursor (Doubtful)	1	1	RHPDYSVVLLLR	NH2-RHPDYSVVLLLR-COOH	361	AR	LA				6	6	100	Confident
283	GEPS01030296.1|:56-799(+)	GEPS01030296.1|:56-799(+) (Doubtful)	1	1	MDEFDNVNFDALVAEVDTIPDADAHLK	NH2-MDEFDNVNFDALVAEVDTIPDADAHLK-COOH	125	GY	AD				1	1	100	Confident
284	GEPS01058494.1|:3-5090(-)	GEPS01058494.1|:3-5090(-) (Doubtful)	1	1	LFADHHVTR	NH2-LFADHHVTR-COOH	180	RE	DV				3	3	100	Confident
285	GEPS01030296.1|:56-799(+)	GEPS01030296.1|:56-799(+) (Doubtful)	1	1	GASISSDQGAQTYFTEDTVR	NH2-GASISSDQGAQTYFTEDTVR-COOH	83	DF	YL				6	6	100	Confident
286	GEPS01045182.1|:1123-1914(-)	GEPS01045182.1|:1123-1914(-) (Doubtful)	1	1	WLPLESNPEVMNK	NH2-WLPLESNPEVMNK-COOH	39	VR	FL				3	3	100	Confident
287	O95678 SWISS-PROT:O95678 Tax_Id=9606 Gene_Symbol=KRT75 Keratin, type II cytoskeletal 75; P02538 SWISS-PROT:P02538 Tax_Id=9606 Gene_Symbol=KRT6A Keratin, type II cytoskeletal 6A; P04259 SWISS-PROT:P04259 Tax_Id=9606 Gene_Symbol=KRT6B Keratin, type II cytoskeletal 6B; P13647 SWISS-PROT:P13647 Tax_Id=9606 Gene_Symbol=KRT5 Keratin, type II cytoskeletal 5; P35908 SWISS-PROT:P35908 Tax_Id=9606 Gene_Sym…	P02538 SWISS-PROT:P02538 Tax_Id=9606 Gene_Symbol=KRT6A Keratin, type II cytoskeletal 6A (Not Validated); P13647 SWISS-PROT:P13647 Tax_Id=9606 Gene_Symbol=KRT5 Keratin, type II cytoskeletal 5, Q5XQN5 SWISS-PROT:Q5XQN5 (Bos taurus) Keratin, type II cytoskeletal 5 (Not Validated); P35908 SWISS-PROT:P35908 Tax_Id=9606 Gene_Symbol=KRT2 Keratin, type II cytoskeletal 2 epidermal (Doubtful); P48668 SWISS…	1	0	NLDLDSIIAEVK	NH2-NLDLDSIIAEVK-COOH	313; 327; 327; 332; 348; 327; 308; 304	NR; NR; NR; NR; SR; NR; NR; NR	AQ; AQ; AQ; AQ; AQ; AQ; AQ; AQ				3	3	100	Confident
288	GEPS01055219.1|:1029-1835(-); GEPS01055220.1|:1148-1969(-); GEPS01055221.1|:1126-1947(-); GEPS01055222.1|:1007-1813(-); GEPS01055223.1|:1095-1922(-); GEPS01055225.1|:1117-1944(-)	GEPS01055219.1|:1029-1835(-), GEPS01055220.1|:1148-1969(-), GEPS01055221.1|:1126-1947(-), GEPS01055222.1|:1007-1813(-), GEPS01055223.1|:1095-1922(-), GEPS01055225.1|:1117-1944(-) (Doubtful); GEPS01055219.1|:1029-1835(-), GEPS01055222.1|:1007-1813(-) (Not Validated)	1	0	TLNTETIAANAR	NH2-TLNTETIAANAR-COOH	161; 161; 161; 161; 161; 161	VK; VK; VK; VK; VK; VK	FF; FF; FF; FF; FF; FF				3	3	100	Confident
289	GEPS01043475.1|:651-1523(-)	GEPS01043475.1|:651-1523(-) (Doubtful)	1	1	LAELSGIEVDQIR	NH2-LAELSGIEVDQIR-COOH	15	KK	KN				3	3	100	Confident
290	P02768-1 SWISS-PROT:P02768-1 Tax_Id=9606 Gene_Symbol=ALB Isoform 1 of Serum albumin precursor; P02769 SWISS-PROT:P02769 (Bos taurus) Bovine serum albumin precursor	P02768-1 SWISS-PROT:P02768-1 Tax_Id=9606 Gene_Symbol=ALB Isoform 1 of Serum albumin precursor (Doubtful); P02769 SWISS-PROT:P02769 (Bos taurus) Bovine serum albumin precursor (Not Validated)	1	0	KVPQVSTPTLVEVSR	NH2-KVPQVSTPTLVEVSR-COOH	438; 437	TK; TR	NL; SL				6	6	100	Confident
291	P35527 SWISS-PROT:P35527 Tax_Id=9606 Gene_Symbol=KRT9 Keratin, type I cytoskeletal 9	P35527 SWISS-PROT:P35527 Tax_Id=9606 Gene_Symbol=KRT9 Keratin, type I cytoskeletal 9 (Doubtful)	1	1	EIETYHNLLEGGQEDFESSGAGK	NH2-EIETYHNLLEGGQEDFESSGAGK-COOH	450	EK	IG				4	4	100	Confident
292	GEPS01030296.1|:56-799(+)	GEPS01030296.1|:56-799(+) (Doubtful)	1	1	ASISSDQGAQTYFTEDTVR	NH2-ASISSDQGAQTYFTEDTVR-COOH	84	FG	YL				3	3	100	Confident
293	GEPS01043475.1|:651-1523(-)	GEPS01043475.1|:651-1523(-) (Doubtful)	1	1	YDYTGLEPSISGMIMEIHHTK	NH2-YDYTGLEPSISGMIMEIHHTK-COOH	94	LK	HH				5	5	100	Confident
294	P13645 SWISS-PROT:P13645 Tax_Id=9606 Gene_Symbol=KRT10 Keratin, type I cytoskeletal 10	P13645 SWISS-PROT:P13645 Tax_Id=9606 Gene_Symbol=KRT10 Keratin, type I cytoskeletal 10 (Doubtful)	1	1	ELTTEIDNNIEQISSYK	NH2-ELTTEIDNNIEQISSYK-COOH	346	SK	SE				3	3	100	Confident
295	GEPS01030296.1|:56-799(+)	GEPS01030296.1|:56-799(+) (Doubtful)	1	1	FDNVNFDALVAEVDTIPDADAHLK	NH2-FDNVNFDALVAEVDTIPDADAHLK-COOH	128	DE	AD				3	3	100	Confident
296	GEPS01045182.1|:1123-1914(-)	GEPS01045182.1|:1123-1914(-) (Doubtful)	1	1	WLPLESNPEVMNK	NH2-WLPLESNPEVM<ox>NK-COOH	39	VR	FL	Oxidation of M (11)		Oxidation of M (11: Very Confident)	2	2	100	Confident
297	GEPS01060178.1|:3-998(-)	GEPS01060178.1|:3-998(-) (Doubtful)	1	1	TSFEVNFTPTTNEPVK	NH2-TSFEVNFTPTTNEPVK-COOH	23	DR	IA				3	3	100	Confident
298	GEPS01058494.1|:3-5090(-)	GEPS01058494.1|:3-5090(-) (Doubtful)	1	1	FPLQYVYHYR	NH2-FPLQYVYHYR-COOH	18	IQ	AK				3	3	93.3333	Doubtful
299	GEPS01048854.1|:137-1651(-); GEPS01059956.1|:1-1098(+)	GEPS01048854.1|:137-1651(-) (Doubtful); GEPS01059956.1|:1-1098(+) (Doubtful)	2	0	YPDHQPMGFPLDR	NH2-YPDHQPMGFPLDR-COOH	467; 328	EK; EK	RI; RI				6	6	100	Confident
300	P35527 SWISS-PROT:P35527 Tax_Id=9606 Gene_Symbol=KRT9 Keratin, type I cytoskeletal 9	P35527 SWISS-PROT:P35527 Tax_Id=9606 Gene_Symbol=KRT9 Keratin, type I cytoskeletal 9 (Doubtful)	1	1	QEYEQLIAK	pyro-QEYEQLIAK-COOH	328	MR	NR	Pyrolidone from Q (1)			2	3	93.3333	Doubtful
301	GEPS01057172.1|:2639-3469(-)	GEPS01057172.1|:2639-3469(-) (Doubtful)	1	1	VGILGGSGLDK	NH2-VGILGGSGLDK-COOH	6	VK	AS				3	3	100	Confident
302	GEPS01030296.1|:56-799(+)	GEPS01030296.1|:56-799(+) (Doubtful)	1	1	LGDFLSDYSDSDK	NH2-LGDFLSDYSDSDK-COOH	216	GG	MF				3	3	100	Confident
303	GEPS01055219.1|:1029-1835(-); GEPS01055220.1|:1148-1969(-); GEPS01055221.1|:1126-1947(-); GEPS01055222.1|:1007-1813(-); GEPS01055223.1|:1095-1922(-); GEPS01055225.1|:1117-1944(-)	GEPS01055219.1|:1029-1835(-), GEPS01055220.1|:1148-1969(-), GEPS01055221.1|:1126-1947(-), GEPS01055222.1|:1007-1813(-), GEPS01055223.1|:1095-1922(-), GEPS01055225.1|:1117-1944(-) (Doubtful); GEPS01055219.1|:1029-1835(-), GEPS01055222.1|:1007-1813(-) (Not Validated)	1	0	YFVLGLPTGGTPLGTYK	NH2-YFVLGLPTGGTPLGTYK-COOH	34; 34; 34; 34; 34; 34	DR; DR; DR; DR; DR; DR	KL; KL; KL; KL; KL; KL				3	3	100	Confident
304	GEPS01059142.1|:104-2128(-)	GEPS01059142.1|:104-2128(-) (Doubtful)	1	1	SSDSSVTIPDR	NH2-SSDSSVTIPDR-COOH	546	RK	TP				3	3	100	Confident
305	GEPS01056244.1|:117-668(+); GEPS01056247.1|:531-1148(-)	GEPS01056244.1|:117-668(+), GEPS01056247.1|:531-1148(-) (Doubtful)	1	1	AYHGPSYGLSR	ace-AYHGPSYGLSR-COOH	2; 2	M; M	EC; EC	Acetylation of protein N-term (1)			3	3	93.3333	Doubtful
306	GEPS01038648.1|:1-576(-); GEPS01050968.1|:92-1477(+); GEPS01050969.1|:92-1477(+)	GEPS01038648.1|:1-576(-) (Not Validated); GEPS01050968.1|:92-1477(+), GEPS01050969.1|:92-1477(+) (Doubtful)	1	0	GFVTSDSK	NH2-GFVTSDSK-COOH	157; 323; 323	KR; KR; KR	ND; ND; ND				2	2	100	Confident
307	P02768-1 SWISS-PROT:P02768-1 Tax_Id=9606 Gene_Symbol=ALB Isoform 1 of Serum albumin precursor	P02768-1 SWISS-PROT:P02768-1 Tax_Id=9606 Gene_Symbol=ALB Isoform 1 of Serum albumin precursor (Doubtful)	1	1	VFDEFKPLVEEPQNLIK	NH2-VFDEFKPLVEEPQNLIK-COOH	397	AK	QN				6	6	100	Confident
308	GEPS01059142.1|:104-2128(-)	GEPS01059142.1|:104-2128(-) (Doubtful)	1	1	FQMEFTGSK	NH2-FQMEFTGSK-COOH	194	GK	SN				3	3	100	Confident
309	GEPS01059958.1|:3-581(-)	GEPS01059958.1|:3-581(-) (Doubtful)	1	1	GELFFWAHHQLTVR	NH2-GELFFWAHHQLTVR-COOH	103	RK	FD				3	3	100	Confident
310	GEPS01050564.1|:2-943(+)	GEPS01050564.1|:2-943(+) (Doubtful)	1	1	SLGGYLAGK	NH2-SLGGYLAGK-COOH	203	CR	EN				3	3	100	Confident
311	GEPS01045182.1|:1123-1914(-)	GEPS01045182.1|:1123-1914(-) (Doubtful)	1	1	KFPINHGPTSEENFLIDGASVLR	NH2-KFPINHGPTSEENFLIDGASVLR-COOH	220	RK	DF				6	6	100	Confident
312	P02768-1 SWISS-PROT:P02768-1 Tax_Id=9606 Gene_Symbol=ALB Isoform 1 of Serum albumin precursor	P02768-1 SWISS-PROT:P02768-1 Tax_Id=9606 Gene_Symbol=ALB Isoform 1 of Serum albumin precursor (Doubtful)	1	1	RHPYFYAPELLFFAK	NH2-RHPYFYAPELLFFAK-COOH	169	AR	RY				6	6	100	Confident
313	P35527 SWISS-PROT:P35527 Tax_Id=9606 Gene_Symbol=KRT9 Keratin, type I cytoskeletal 9	P35527 SWISS-PROT:P35527 Tax_Id=9606 Gene_Symbol=KRT9 Keratin, type I cytoskeletal 9 (Doubtful)	1	1	SGGGGGGGLGSGGSIR	NH2-SGGGGGGGLGSGGSIR-COOH	14	SR	SS				2	2	100	Confident
314	H-INV:HIT000292931 Tax_Id=9606 Gene_Symbol=- Similar to Keratin, type II cytoskeletal 8; P04264 SWISS-PROT:P04264 Tax_Id=9606 Gene_Symbol=KRT1 Keratin, type II cytoskeletal 1; P05787 SWISS-PROT:P05787 Tax_Id=9606 Gene_Symbol=KRT8 Keratin, type II cytoskeletal 8; P08729 SWISS-PROT:P08729 Tax_Id=9606 Gene_Symbol=KRT7 Keratin, type II cytoskeletal 7; P19013 SWISS-PROT:P19013 Tax_Id=9606 Gene_Symbol=…	P04264 SWISS-PROT:P04264 Tax_Id=9606 Gene_Symbol=KRT1 Keratin, type II cytoskeletal 1 (Doubtful); P05787 SWISS-PROT:P05787 Tax_Id=9606 Gene_Symbol=KRT8 Keratin, type II cytoskeletal 8 (Not Validated); P08729 SWISS-PROT:P08729 Tax_Id=9606 Gene_Symbol=KRT7 Keratin, type II cytoskeletal 7 (Not Validated); P19013 SWISS-PROT:P19013 Tax_Id=9606 Gene_Symbol=KRT4 keratin 4 (Not Validated); Q6KB66-1 SWISS…	1	0	LALDIEIATYR	NH2-LALDIEIATYR-COOH	342; 473; 382; 383; 504; 383; 374; 424; 377	VK; TK; VK; VK; VK; VK; VK; MK; TK	KL; TL; KL; KL; KL; KL; KL; KL; KL				1	1	100	Confident
315	GEPS01043475.1|:651-1523(-)	GEPS01043475.1|:651-1523(-) (Doubtful)	1	1	AELGEEKGEHALPPLK	NH2-AELGEEKGEHALPPLK-COOH	78	IK	YD				3	3	100	Confident
316	GEPS01030296.1|:56-799(+)	GEPS01030296.1|:56-799(+) (Doubtful)	1	1	NDQLYALYNR	NH2-NDQLYALYNR-COOH	28	TA	QK				3	3	93.3333	Doubtful
317	GEPS01057172.1|:2639-3469(-)	GEPS01057172.1|:2639-3469(-) (Doubtful)	1	1	GNADNAMTALK	NH2-GNADNAMTALK-COOH	236	MK	TT				3	4	100	Confident
318	P35908 SWISS-PROT:P35908 Tax_Id=9606 Gene_Symbol=KRT2 Keratin, type II cytoskeletal 2 epidermal; Q3TTY5 SWISS-PROT:Q3TTY5 Tax_Id=10090 Gene_Symbol=Krt2 Keratin, type II cytoskeletal 2 epidermal	P35908 SWISS-PROT:P35908 Tax_Id=9606 Gene_Symbol=KRT2 Keratin, type II cytoskeletal 2 epidermal (Doubtful); Q3TTY5 SWISS-PROT:Q3TTY5 Tax_Id=10090 Gene_Symbol=Krt2 Keratin, type II cytoskeletal 2 epidermal (Not Validated)	1	0	VDPEIQNVK	NH2-VDPEIQNVK-COOH	173; 188	VK; VK	AQ; SQ				3	3	100	Confident
319	GEPS01058494.1|:3-5090(-)	GEPS01058494.1|:3-5090(-) (Doubtful)	1	1	ANLSVYVTSATK	NH2-ANLSVYVTSATK-COOH	49	LK	VV				3	3	100	Confident
320	GEPS01034377.1|:9-2516(-)	GEPS01034377.1|:9-2516(-) (Doubtful)	1	1	DAGDDPSDTATNLVEEEGGQTQNAR	NH2-DAGDDPSDTATNLVEEEGGQTQNAR-COOH	649	RR	QQ				3	3	100	Confident
321	A2A4G1 TREMBL:A2A4G1 Tax_Id=10090 Gene_Symbol=Krt15 Keratin complex 1, acidic, gene 15; P02533 SWISS-PROT:P02533 Tax_Id=9606 Gene_Symbol=KRT14 Keratin, type I cytoskeletal 14; P02535-1 SWISS-PROT:P02535-1 Tax_Id=10090 Gene_Symbol=Krt10 Isoform 1 of Keratin, type I cytoskeletal 10; P08779 SWISS-PROT:P08779 Tax_Id=9606 Gene_Symbol=KRT16 Keratin, type I cytoskeletal 16; P13645 SWISS-PROT:P13645 Tax_…	A2A4G1 TREMBL:A2A4G1 Tax_Id=10090 Gene_Symbol=Krt15 Keratin complex 1, acidic, gene 15 (Not Validated); P02533 SWISS-PROT:P02533 Tax_Id=9606 Gene_Symbol=KRT14 Keratin, type I cytoskeletal 14, Q04695 SWISS-PROT:Q04695 Tax_Id=9606 Gene_Symbol=KRT17 Keratin, type I cytoskeletal 17, Q61782 TREMBL:Q61782 Tax_Id=10090 Gene_Symbol=Krt14 Type I epidermal keratin (Fragment), Q9QWL7 SWISS-PROT:Q9QWL7 Tax_I…	1	0	VTMQNLNDR	NH2-VTMQNLNDR-COOH	100; 117; 146; 119; 148; 88; 115; 110; 86; 85; 81; 115	EK; EK; GR; EK; EK; EK; EK; EK; EK; EK; EK; EK	LA; LA; LA; LA; LA; LA; LA; LA; LA; LA; LA; LA				3	3	100	Confident
322	GEPS01030296.1|:56-799(+)	GEPS01030296.1|:56-799(+) (Doubtful)	1	1	VTANDQLYALYNR	NH2-VTANDQLYALYNR-COOH	25	AR	QK				46	46	100	Confident
323	GEPS01030296.1|:56-799(+)	GEPS01030296.1|:56-799(+) (Doubtful)	1	1	VDTIPDADAHLK	NH2-VDTIPDADAHLK-COOH	140	AE	AD				3	3	93.3333	Doubtful
324	GEPS01030296.1|:56-799(+)	GEPS01030296.1|:56-799(+) (Doubtful)	1	1	SISSDQGAQTYFTEDTVR	NH2-SISSDQGAQTYFTEDTVR-COOH	85	GA	YL				5	5	100	Confident
325	ENSEMBL:ENSBTAP00000038253 (Bos taurus) 63 kDa protein; P04264 SWISS-PROT:P04264 Tax_Id=9606 Gene_Symbol=KRT1 Keratin, type II cytoskeletal 1; P35908 SWISS-PROT:P35908 Tax_Id=9606 Gene_Symbol=KRT2 Keratin, type II cytoskeletal 2 epidermal; Q6IFZ6 SWISS-PROT:Q6IFZ6 Tax_Id=10090 Gene_Symbol=Krt77 Keratin, type II cytoskeletal 1b; Q6NXH9 TREMBL:Q6NXH9 Tax_Id=10090 Gene_Symbol=Krt73 Keratin 73; Q7Z79…	ENSEMBL:ENSBTAP00000038253 (Bos taurus) 63 kDa protein (Not Validated); P04264 SWISS-PROT:P04264 Tax_Id=9606 Gene_Symbol=KRT1 Keratin, type II cytoskeletal 1 (Doubtful); P35908 SWISS-PROT:P35908 Tax_Id=9606 Gene_Symbol=KRT2 Keratin, type II cytoskeletal 2 epidermal (Doubtful); Q6IFZ6 SWISS-PROT:Q6IFZ6 Tax_Id=10090 Gene_Symbol=Krt77 Keratin, type II cytoskeletal 1b (Not Validated); Q6NXH9 TREMBL:Q…	2	0	FLEQQNQVLQTK	NH2-FLEQQNQVLQTK-COOH	196; 200; 204; 187; 151; 184; 151	VR; VR; VR; VR; VR; VR; VR	WE; WE; WE; WE; WE; WE; WE				3	3	100	Confident
326	P35908 SWISS-PROT:P35908 Tax_Id=9606 Gene_Symbol=KRT2 Keratin, type II cytoskeletal 2 epidermal	P35908 SWISS-PROT:P35908 Tax_Id=9606 Gene_Symbol=KRT2 Keratin, type II cytoskeletal 2 epidermal (Doubtful)	1	1	HGGGGGGFGGGGFGSR	NH2-HGGGGGGFGGGGFGSR-COOH	46	SR	SL				2	2	100	Confident
327	P02768-1 SWISS-PROT:P02768-1 Tax_Id=9606 Gene_Symbol=ALB Isoform 1 of Serum albumin precursor	P02768-1 SWISS-PROT:P02768-1 Tax_Id=9606 Gene_Symbol=ALB Isoform 1 of Serum albumin precursor (Doubtful)	1	1	DDNPNLPR	NH2-DDNPNLPR-COOH	131	HK	LV				3	3	100	Confident
328	GEPS01057172.1|:2639-3469(-)	GEPS01057172.1|:2639-3469(-) (Doubtful)	1	1	EDWSETIPQLK	NH2-EDWSETIPQLK-COOH	255	AK	KS				3	3	100	Confident
329	GEPS01043475.1|:651-1523(-)	GEPS01043475.1|:651-1523(-) (Doubtful)	1	1	ALQPSVLHPQIGLIFDHIK	NH2-ALQPSVLHPQIGLIFDHIK-COOH	59	GK	AE				4	4	100	Confident
330	P00761 SWISS-PROT:P00761|TRYP_PIG Trypsin - Sus scrofa (Pig).	P00761 SWISS-PROT:P00761|TRYP_PIG Trypsin - Sus scrofa (Pig). (Doubtful)	1	1	IDVLEGNEQFINAAK	NH2-IDVLEGNEQFINAAK-COOH	63	HN	II				3	3	100	Confident
331	GEPS01035623.1|:561-1340(-)	GEPS01035623.1|:561-1340(-) (Doubtful)	1	1	FLLDQFNLK	NH2-FLLDQFNLK-COOH	216	AR	GT				4	4	100	Confident
332	GEPS01048854.1|:137-1651(-)	GEPS01048854.1|:137-1651(-) (Doubtful)	1	1	AYTAQMTQTPGK	NH2-AYTAQMTQTPGK-COOH	5	SK	FH				3	3	100	Confident
333	GEPS01030296.1|:56-799(+)	GEPS01030296.1|:56-799(+) (Doubtful)	1	1	DNVNFDALVAEVDTIPDADAHLK	NH2-DNVNFDALVAEVDTIPDADAHLK-COOH	129	EF	AD				3	3	100	Confident
334	GEPS01059958.1|:3-581(-)	GEPS01059958.1|:3-581(-) (Doubtful)	1	1	LSNHLDLVDELYWDR	NH2-LSNHLDLVDELYWDR-COOH	122	ER	PI				2	2	100	Confident
335	GEPS01048854.1|:137-1651(-); GEPS01059958.1|:3-581(-)	GEPS01048854.1|:137-1651(-) (Doubtful); GEPS01059958.1|:3-581(-) (Doubtful)	2	0	MDFTGSQK	NH2-MDFTGSQK-COOH	19; 54	FH; FK	NP; NP				2	2	100	Confident
336	P02768-1 SWISS-PROT:P02768-1 Tax_Id=9606 Gene_Symbol=ALB Isoform 1 of Serum albumin precursor	P02768-1 SWISS-PROT:P02768-1 Tax_Id=9606 Gene_Symbol=ALB Isoform 1 of Serum albumin precursor (Doubtful)	1	1	FYAPELLFFAK	NH2-FYAPELLFFAK-COOH	173	PY	RY				3	3	100	Confident
337	GEPS01048853.1|:1-567(-)	GEPS01048853.1|:1-567(-) (Doubtful)	1	1	LLEQHHWFSLFNTR	NH2-LLEQHHWFSLFNTR-COOH	108	GR	QR				2	2	100	Confident
338	GEPS01030296.1|:56-799(+)	GEPS01030296.1|:56-799(+) (Doubtful)	1	1	QLGGLGDFLSDYSDSDK	pyro-QLGGLGDFLSDYSDSDK-COOH	212	QF	MF	Pyrolidone from Q (1)			3	3	100	Confident
339	GEPS01035623.1|:561-1340(-)	GEPS01035623.1|:561-1340(-) (Doubtful)	1	1	VTALLMANTIVGPDDFGLYE	NH2-VTALLM<ox>ANTIVGPDDFGLYE-COOH	240	DR		Oxidation of M (6)		Oxidation of M (6: Very Confident)	3	3	100	Confident
340	GEPS01059142.1|:104-2128(-)	GEPS01059142.1|:104-2128(-) (Doubtful)	1	1	YGGEFPSRPDNK	NH2-YGGEFPSRPDNK-COOH	289	YR	CF				1	1	100	Confident
341	GEPS01050564.1|:2-943(+)	GEPS01050564.1|:2-943(+) (Doubtful)	1	1	WAVWAGAR	NH2-WAVWAGAR-COOH	235	VR	QT				3	3	100	Confident
342	P04264 SWISS-PROT:P04264 Tax_Id=9606 Gene_Symbol=KRT1 Keratin, type II cytoskeletal 1	P04264 SWISS-PROT:P04264 Tax_Id=9606 Gene_Symbol=KRT1 Keratin, type II cytoskeletal 1 (Doubtful)	1	1	SLVNLGGSK	NH2-SLVNLGGSK-COOH	66	SR	SI				3	3	100	Confident

## Sheet: Ecy15 kDa_proteins
	Main Accession	Description	Gene Name	Chromosome	MW [kDa]	Possible Coverage [%]	Coverage [%]	Spectrum Counting	Confidently Localized Modification Sites	# Confidently Localized Modification Sites	Ambiguously Localized Modification Sites	#Ambiguously Localized Modification Sites	Protein Inference	Secondary Accessions	Protein Group	#Validated Peptides	#Peptides	#Unique	#Validated Unique	#Unique to Group	#Validated Unique to Group	#Validated PSMs	#PSMs	Confidence [%]	Validation
14	GEPS01035623.1|:561-1340(-)				29.2577	86.87	54.44	10419.4	Oxidation of M(M130, M133, M147, M154, M245)	Oxidation of M(5)			Single Protein		GEPS01035623.1|:561-1340(-)	52	59	59	52	59	52	456	479	100	Doubtful
18	P02768-1 SWISS-PROT:P02768-1 Tax_Id=9606 Gene_Symbol=ALB Isoform 1 of Serum albumin precursor				69.3215	100	28.74	878.239	Oxidation of M(M353)	Oxidation of M(1)			Single Protein		P02768-1 SWISS-PROT:P02768-1 Tax_Id=9606 Gene_Symbol=ALB Isoform 1 of Serum albumin precursor	21	27	25	19	27	21	74	83	100	Doubtful
1	P04264 SWISS-PROT:P04264 Tax_Id=9606 Gene_Symbol=KRT1 Keratin, type II cytoskeletal 1				65.978	69.25	25.62	713.924	Oxidation of M(M469)	Oxidation of M(1)			Single Protein		P04264 SWISS-PROT:P04264 Tax_Id=9606 Gene_Symbol=KRT1 Keratin, type II cytoskeletal 1	17	21	13	10	19	15	51	58	100	Doubtful
25	P00761 SWISS-PROT:P00761|TRYP_PIG Trypsin - Sus scrofa (Pig).				24.3938	81.39	33.77	10022.7	Oxidation of M(M94)	Oxidation of M(1)			Single Protein		P00761 SWISS-PROT:P00761|TRYP_PIG Trypsin - Sus scrofa (Pig).	21	21	20	20	20	20	203	209	100	Doubtful
10	P13645 SWISS-PROT:P13645 Tax_Id=9606 Gene_Symbol=KRT10 Keratin, type I cytoskeletal 10				59.4749	70.83	21.92	600.485					Single Protein		P13645 SWISS-PROT:P13645 Tax_Id=9606 Gene_Symbol=KRT10 Keratin, type I cytoskeletal 10	11	13	7	6	13	11	31	33	100	Doubtful
7	P35908 SWISS-PROT:P35908 Tax_Id=9606 Gene_Symbol=KRT2 Keratin, type II cytoskeletal 2 epidermal				65.8254	87.6	15.81	362.853					Single Protein		P35908 SWISS-PROT:P35908 Tax_Id=9606 Gene_Symbol=KRT2 Keratin, type II cytoskeletal 2 epidermal	9	12	7	5	10	7	24	26	100	Doubtful
8	P35527 SWISS-PROT:P35527 Tax_Id=9606 Gene_Symbol=KRT9 Keratin, type I cytoskeletal 9				62.0919	68.38	12.36	383.406					Single Protein		P35527 SWISS-PROT:P35527 Tax_Id=9606 Gene_Symbol=KRT9 Keratin, type I cytoskeletal 9	6	11	11	6	11	6	11	16	100	Doubtful
9	GEPS01040334.1|:213-941(+)				26.7794	80.99	28.93	2905	Oxidation of M(M198, M226)	Oxidation of M(2)			Single Protein		GEPS01040334.1|:213-941(+)	8	9	9	8	9	8	39	40	100	Doubtful
16	GEPS01030296.1|:56-799(+)				27.3802	87.45	34.41	35684	Oxidation of M(M229)	Oxidation of M(1)			Single Protein		GEPS01030296.1|:56-799(+)	8	8	8	8	8	8	250	256	100	Doubtful
13	GEPS01054970.1|:2367-2867(-)				18.5264	100	44.58	1036.05					Single Protein		GEPS01054970.1|:2367-2867(-)	5	6	6	5	6	5	15	16	100	Doubtful
6	GEPS01059853.1|:1168-5091(-)				140.799	84.77	1.91	131.791					Single Protein		GEPS01059853.1|:1168-5091(-)	2	5	5	2	5	2	6	9	100	Doubtful
2	GEPS01054819.1|:63-560(-)				18.6915	100	15.76	884.997					Single Protein		GEPS01054819.1|:63-560(-)	2	4	4	2	4	2	6	8	100	Doubtful
26	GEPS01023158.1|:52-555(+)				18.3484	100	14.37	388.621					Related Proteins	GEPS01023159.1|:139-642(+)	GEPS01023158.1|:52-555(+), GEPS01023159.1|:139-642(+)	2	4	4	2	4	2	3	5	100	Doubtful
23	GEPS01058494.1|:3-5090(-)				187.516	89.92	0.77	21.2786					Single Protein		GEPS01058494.1|:3-5090(-)	1	3	3	1	3	1	1	3	100	Doubtful
3	GEPS01054055.1|:2392-3720(-)				49.9978	77.83	2.26	94.331					Single Protein		GEPS01054055.1|:2392-3720(-)	1	2	2	1	2	1	1	6	100	Doubtful
11	GEPS01030611.1|:239-862(-)				22.2815	100	16.43	235.144					Single Protein		GEPS01030611.1|:239-862(-)	2	2	2	2	2	2	2	2	100	Doubtful
17	P07477 SWISS-PROT:P07477 Tax_Id=9606 Gene_Symbol=PRSS1 Trypsin-1 precursor				26.5411	69.64	11.34	943.31					Single Protein		P07477 SWISS-PROT:P07477 Tax_Id=9606 Gene_Symbol=PRSS1 Trypsin-1 precursor	2	2	1	1	1	1	7	10	100	Doubtful
19	GEPS01012540.1|:99-557(+)				17.8718	100	7.89	640.458					Single Protein		GEPS01012540.1|:99-557(+)	1	2	2	1	2	1	3	4	100	Doubtful
21	GEPS01048369.1|:1589-2107(-)				19.7535	100	6.4	565.986					Related Proteins	GEPS01048371.1|:1178-1696(-), GEPS01048373.1|:1080-1598(-)	GEPS01048369.1|:1589-2107(-), GEPS01048371.1|:1178-1696(-), GEPS01048373.1|:1080-1598(-)	1	2	2	1	2	1	3	4	100	Doubtful
28	GEPS01048854.1|:137-1651(-)				57.5734	78.37	2.58	246.455	Oxidation of M(M473)	Oxidation of M(1)			Related Proteins	GEPS01059956.1|:1-1098(+)	GEPS01048854.1|:137-1651(-), GEPS01059956.1|:1-1098(+)	2	2	0	0	2	2	11	11	100	Doubtful
4	GEPS01030789.1|:463-2187(+)				62.0283	82.09	4.87	68.7497					Single Protein		GEPS01030789.1|:463-2187(+)	1	1	1	1	1	1	1	6	100	Doubtful
5	GEPS01036704.1|:10-1251(-)				47.0464	91.53	2.42	85.8462					Single Protein		GEPS01036704.1|:10-1251(-)	1	1	1	1	1	1	1	1	100	Doubtful
12	GEPS01056124.1|:112-1314(+)				44.8275	77.25	3	315.047					Single Protein		GEPS01056124.1|:112-1314(+)	1	1	1	1	1	1	3	3	100	Doubtful
15	GEPS01051541.1|:2-1918(+)				69.2055	76.84	1.88	66.0894					Single Protein		GEPS01051541.1|:2-1918(+)	1	1	1	1	1	1	1	1	100	Doubtful
20	GEPS01048853.1|:1-567(-)				21.1817	60.85	15.34	1128.69					Single Protein		GEPS01048853.1|:1-567(-)	1	1	1	1	1	1	4	4	84.375	Doubtful
22	GEPS01052512.1|:800-3496(-)				100.71	83.74	1.34	43.1514					Related Proteins	GEPS01052513.1|:800-2284(-)	GEPS01052512.1|:800-3496(-), GEPS01052513.1|:800-2284(-)	1	1	1	1	1	1	1	1	100	Doubtful
24	GEPS01053416.1|:455-898(-)				15.827	74.15	14.29	297.705					Single Protein		GEPS01053416.1|:455-898(-)	1	1	1	1	1	1	1	5	100	Doubtful
27	GEPS01033983.1|:33-410(-)				13.9775	100	8	519.198					Single Protein		GEPS01033983.1|:33-410(-)	1	1	1	1	1	1	2	2	100	Doubtful

## Sheet: Ecy 15 kDa_peptides
	Protein(s)	Protein Group(s)	#Validated Protein Group(s)	Unique Database	Sequence	Modified Sequence	Position	AAs Before	AAs After	Variable Modifications	Fixed Modifications	Localization Confidence	#Validated PSMs	#PSMs	Confidence [%]	Validation
1	GEPS01040334.1|:213-941(+)	GEPS01040334.1|:213-941(+) (Doubtful)	1	1	SGLGQPIPSPQEATFR	NH2-SGLGQPIPSPQEATFR-COOH	118	LK	NK				3	3	100	Doubtful
2	P00761 SWISS-PROT:P00761|TRYP_PIG Trypsin - Sus scrofa (Pig).	P00761 SWISS-PROT:P00761|TRYP_PIG Trypsin - Sus scrofa (Pig). (Doubtful)	1	1	LSSPATLNSR	NH2-LSSPATLNSR-COOH	98	IK	VA				12	12	100	Doubtful
3	GEPS01035623.1|:561-1340(-)	GEPS01035623.1|:561-1340(-) (Doubtful)	1	1	VNQMQIVGSLK	NH2-VNQM<ox>QIVGSLK-COOH	151	AH	KD	Oxidation of M (4)		Oxidation of M (4: Very Confident)	40	40	100	Doubtful
4	GEPS01054819.1|:63-560(-)	GEPS01054819.1|:63-560(-) (Doubtful)	1	1	DEFPVIWSLTDR	NH2-DEFPVIWSLTDR-COOH	138	PR	KT				3	3	100	Doubtful
5	P13645 SWISS-PROT:P13645 Tax_Id=9606 Gene_Symbol=KRT10 Keratin, type I cytoskeletal 10	P13645 SWISS-PROT:P13645 Tax_Id=9606 Gene_Symbol=KRT10 Keratin, type I cytoskeletal 10 (Doubtful)	1	1	VLDELTLTK	NH2-VLDELTLTK-COOH	258	RR	AD				3	3	100	Doubtful
6	GEPS01040334.1|:213-941(+)	GEPS01040334.1|:213-941(+) (Doubtful)	1	1	KFSNLYTSLEK	NH2-KFSNLYTSLEK-COOH	215	MR	MS				4	4	100	Doubtful
7	P02768-1 SWISS-PROT:P02768-1 Tax_Id=9606 Gene_Symbol=ALB Isoform 1 of Serum albumin precursor	P02768-1 SWISS-PROT:P02768-1 Tax_Id=9606 Gene_Symbol=ALB Isoform 1 of Serum albumin precursor (Doubtful)	1	1	LVNEVTEFAK	NH2-LVNEVTEFAK-COOH	66	VK	TC				3	3	100	Doubtful
8	GEPS01035623.1|:561-1340(-)	GEPS01035623.1|:561-1340(-) (Doubtful)	1	1	VTALLMANTIVGPDDFGLYE	NH2-VTALLMANTIVGPDDFGLYE-COOH	240	DR					28	34	100	Doubtful
9	P04264 SWISS-PROT:P04264 Tax_Id=9606 Gene_Symbol=KRT1 Keratin, type II cytoskeletal 1	P04264 SWISS-PROT:P04264 Tax_Id=9606 Gene_Symbol=KRT1 Keratin, type II cytoskeletal 1 (Doubtful)	1	1	QISNLQQSISDAEQR	NH2-QISNLQQSISDAEQR-COOH	418	KK	GE				3	3	100	Doubtful
10	P04264 SWISS-PROT:P04264 Tax_Id=9606 Gene_Symbol=KRT1 Keratin, type II cytoskeletal 1	P04264 SWISS-PROT:P04264 Tax_Id=9606 Gene_Symbol=KRT1 Keratin, type II cytoskeletal 1 (Doubtful)	1	1	YEELQITAGR	NH2-YEELQITAGR-COOH	377	SK	HG				3	3	100	Doubtful
11	P02768-1 SWISS-PROT:P02768-1 Tax_Id=9606 Gene_Symbol=ALB Isoform 1 of Serum albumin precursor	P02768-1 SWISS-PROT:P02768-1 Tax_Id=9606 Gene_Symbol=ALB Isoform 1 of Serum albumin precursor (Doubtful)	1	1	TYETTLEK	NH2-TYETTLEK-COOH	376	AK	CC				3	3	100	Doubtful
12	GEPS01035623.1|:561-1340(-)	GEPS01035623.1|:561-1340(-) (Doubtful)	1	1	LASMTAHVNQMQIVGSLK	NH2-LASMTAHVNQMQIVGSLK-COOH	144	LD	KD				2	2	100	Doubtful
13	GEPS01040334.1|:213-941(+)	GEPS01040334.1|:213-941(+) (Doubtful)	1	1	TGGNHGDFDADMAHYLEEK	NH2-TGGNHGDFDADM<ox>AHYLEEK-COOH	187	KR	LE	Oxidation of M (12)		Oxidation of M (12: Very Confident)	1	1	100	Doubtful
14	GEPS01035623.1|:561-1340(-)	GEPS01035623.1|:561-1340(-) (Doubtful)	1	1	GITDSHNELDLASMTAHVNQMQIVGSLK	NH2-GITDSHNELDLASMTAHVNQM<ox>QIVGSLK-COOH	134	EM	KD	Oxidation of M (21)		Oxidation of M (21: Very Confident)	7	7	100	Doubtful
15	GEPS01035623.1|:561-1340(-)	GEPS01035623.1|:561-1340(-) (Doubtful)	1	1	GITDSHNELDLASMTAHVNQMQIVGSLK	NH2-GITDSHNELDLASM<ox>TAHVNQMQIVGSLK-COOH	134	EM	KD	Oxidation of M (14)		Oxidation of M (14: Very Confident)	4	4	100	Doubtful
16	P02535-1 SWISS-PROT:P02535-1 Tax_Id=10090 Gene_Symbol=Krt10 Isoform 1 of Keratin, type I cytoskeletal 10; P13645 SWISS-PROT:P13645 Tax_Id=9606 Gene_Symbol=KRT10 Keratin, type I cytoskeletal 10	P02535-1 SWISS-PROT:P02535-1 Tax_Id=10090 Gene_Symbol=Krt10 Isoform 1 of Keratin, type I cytoskeletal 10 (Not Validated); P13645 SWISS-PROT:P13645 Tax_Id=9606 Gene_Symbol=KRT10 Keratin, type I cytoskeletal 10 (Doubtful)	1	0	LENEIQTYR	NH2-LENEIQTYR-COOH	440; 442	TR; IR	SL; SL				3	3	100	Doubtful
17	P04264 SWISS-PROT:P04264 Tax_Id=9606 Gene_Symbol=KRT1 Keratin, type II cytoskeletal 1; P35908 SWISS-PROT:P35908 Tax_Id=9606 Gene_Symbol=KRT2 Keratin, type II cytoskeletal 2 epidermal	P04264 SWISS-PROT:P04264 Tax_Id=9606 Gene_Symbol=KRT1 Keratin, type II cytoskeletal 1 (Doubtful); P35908 SWISS-PROT:P35908 Tax_Id=9606 Gene_Symbol=KRT2 Keratin, type II cytoskeletal 2 epidermal (Doubtful)	2	0	IEISELNR	NH2-IEISELNR-COOH	396; 400	SK; IK	VI; VI				3	3	100	Doubtful
18	P35527 SWISS-PROT:P35527 Tax_Id=9606 Gene_Symbol=KRT9 Keratin, type I cytoskeletal 9	P35527 SWISS-PROT:P35527 Tax_Id=9606 Gene_Symbol=KRT9 Keratin, type I cytoskeletal 9 (Doubtful)	1	1	VQALEEANNDLENK	NH2-VQALEEANNDLENK-COOH	171	DK	IQ				2	2	100	Doubtful
19	P04264 SWISS-PROT:P04264 Tax_Id=9606 Gene_Symbol=KRT1 Keratin, type II cytoskeletal 1; P50446 SWISS-PROT:P50446 Tax_Id=10090 Gene_Symbol=Krt6a Keratin, type II cytoskeletal 6A; Q5XQN5 SWISS-PROT:Q5XQN5 (Bos taurus) Keratin, type II cytoskeletal 5; Q8BGZ7 TREMBL:Q8BGZ7;Q99MH7 Tax_Id=10090 Gene_Symbol=Krt75 10 days neonate skin cDNA, RIKEN full-length enriched library, clone:4732475I03 product:CYTO…	P04264 SWISS-PROT:P04264 Tax_Id=9606 Gene_Symbol=KRT1 Keratin, type II cytoskeletal 1 (Doubtful); P50446 SWISS-PROT:P50446 Tax_Id=10090 Gene_Symbol=Krt6a Keratin, type II cytoskeletal 6A (Not Validated); Q8BGZ7 TREMBL:Q8BGZ7;Q99MH7 Tax_Id=10090 Gene_Symbol=Krt75 10 days neonate skin cDNA, RIKEN full-length enriched library, clone:4732475I03 product:CYTOKERATIN homolog (Not Validated); Q922U2 SWIS…	1	0	SLDLDSIIAEVK	NH2-SLDLDSIIAEVK-COOH	344; 316; 333; 314; 326	NR; NR; NR; NR; NR	AQ; AQ; AQ; AQ; AQ				3	3	100	Doubtful
20	GEPS01035623.1|:561-1340(-)	GEPS01035623.1|:561-1340(-) (Doubtful)	1	1	GITDSHNELDLASMTAHVNQMQIVGSLK	NH2-GITDSHNELDLASMTAHVNQMQIVGSLK-COOH	134	EM	KD				7	7	100	Doubtful
21	GEPS01035623.1|:561-1340(-)	GEPS01035623.1|:561-1340(-) (Doubtful)	1	1	LDFLASDR	NH2-LDFLASDR-COOH	230	GR	DR				37	37	100	Doubtful
22	GEPS01030296.1|:56-799(+)	GEPS01030296.1|:56-799(+) (Doubtful)	1	1	NVLDEGSDFLW	NH2-NVLDEGSDFLW-COOH	237	AR					2	3	100	Doubtful
23	P13645 SWISS-PROT:P13645 Tax_Id=9606 Gene_Symbol=KRT10 Keratin, type I cytoskeletal 10	P13645 SWISS-PROT:P13645 Tax_Id=9606 Gene_Symbol=KRT10 Keratin, type I cytoskeletal 10 (Doubtful)	1	1	GSLGGGFSSGGFSGGSFSR	NH2-GSLGGGFSSGGFSGGSFSR-COOH	41	SK	GS				3	3	100	Doubtful
24	GEPS01035623.1|:561-1340(-)	GEPS01035623.1|:561-1340(-) (Doubtful)	1	1	IQEQAGYFR	NH2-IQEQAGYFR-COOH	119	KG	CV				2	2	100	Doubtful
25	GEPS01054970.1|:2367-2867(-)	GEPS01054970.1|:2367-2867(-) (Doubtful)	1	1	LALPTKEDVLAEK	NH2-LALPTKEDVLAEK-COOH	38	EK	AL				1	1	100	Doubtful
26	GEPS01035623.1|:561-1340(-)	GEPS01035623.1|:561-1340(-) (Doubtful)	1	1	VTALLMANTIVGPDDFG	NH2-VTALLMANTIVGPDDFG-COOH	240	DR	LY				3	3	100	Doubtful
27	GEPS01030296.1|:56-799(+)	GEPS01030296.1|:56-799(+) (Doubtful)	1	1	GDQFQLGGLGDFLSDYSDSDK	NH2-GDQFQLGGLGDFLSDYSDSDK-COOH	208	AR	MF				5	8	100	Doubtful
28	GEPS01048853.1|:1-567(-)	GEPS01048853.1|:1-567(-) (Doubtful)	1	1	QREEALMLFDVFMHSKTWETAVNNAAYFR	NH2-QREEALMLFDVFMHSKTWETAVNNAAYFR-COOH	122	TR	EK				4	4	97.8261	Doubtful
29	P00761 SWISS-PROT:P00761|TRYP_PIG Trypsin - Sus scrofa (Pig).	P00761 SWISS-PROT:P00761|TRYP_PIG Trypsin - Sus scrofa (Pig). (Doubtful)	1	1	IITHPNFN	NH2-IITHPNFN-COOH	78	AK	GN				1	2	100	Doubtful
30	GEPS01035623.1|:561-1340(-)	GEPS01035623.1|:561-1340(-) (Doubtful)	1	1	DAYPLPADVVTTQHY	NH2-DAYPLPADVVTTQHY-COOH	183	NK	LF				8	8	100	Doubtful
31	P00761 SWISS-PROT:P00761|TRYP_PIG Trypsin - Sus scrofa (Pig).	P00761 SWISS-PROT:P00761|TRYP_PIG Trypsin - Sus scrofa (Pig). (Doubtful)	1	1	LGEHNIDVLEGNEQFINAA	NH2-LGEHNIDVLEGNEQFINAA-COOH	58	VR	KI				3	3	100	Doubtful
32	GEPS01030296.1|:56-799(+)	GEPS01030296.1|:56-799(+) (Doubtful)	1	1	ADFGASISSDQGAQTYFTEDTVR	NH2-ADFGASISSDQGAQTYFTEDTVR-COOH	80	SK	YL				233	235	100	Doubtful
33	GEPS01030296.1|:56-799(+)	GEPS01030296.1|:56-799(+) (Doubtful)	1	1	MFAIVWAR	NH2-MFAIVWAR-COOH	229	DK	NV				1	1	100	Doubtful
34	P00761 SWISS-PROT:P00761|TRYP_PIG Trypsin - Sus scrofa (Pig).	P00761 SWISS-PROT:P00761|TRYP_PIG Trypsin - Sus scrofa (Pig). (Doubtful)	1	1	FNGNTLDNDIMLIK	NH2-FNGNTLDNDIMLIK-COOH	84	PN	LS				3	3	100	Doubtful
35	ENSEMBL:ENSBTAP00000038253 (Bos taurus) 63 kDa protein; P04264 SWISS-PROT:P04264 Tax_Id=9606 Gene_Symbol=KRT1 Keratin, type II cytoskeletal 1	ENSEMBL:ENSBTAP00000038253 (Bos taurus) 63 kDa protein (Not Validated); P04264 SWISS-PROT:P04264 Tax_Id=9606 Gene_Symbol=KRT1 Keratin, type II cytoskeletal 1 (Doubtful)	1	0	SLNNQFASFIDK	NH2-SLNNQFASFIDK-COOH	182; 186	IK; IK	VR; VR				3	3	100	Doubtful
36	P00761 SWISS-PROT:P00761|TRYP_PIG Trypsin - Sus scrofa (Pig).	P00761 SWISS-PROT:P00761|TRYP_PIG Trypsin - Sus scrofa (Pig). (Doubtful)	1	1	TLDNDIMLIK	NH2-TLDNDIMLIK-COOH	88	GN	LS				3	3	100	Doubtful
37	P02768-1 SWISS-PROT:P02768-1 Tax_Id=9606 Gene_Symbol=ALB Isoform 1 of Serum albumin precursor	P02768-1 SWISS-PROT:P02768-1 Tax_Id=9606 Gene_Symbol=ALB Isoform 1 of Serum albumin precursor (Doubtful)	1	1	SLHTLFGDK	NH2-SLHTLFGDK-COOH	89	DK	LC				3	3	100	Doubtful
38	P02768-1 SWISS-PROT:P02768-1 Tax_Id=9606 Gene_Symbol=ALB Isoform 1 of Serum albumin precursor	P02768-1 SWISS-PROT:P02768-1 Tax_Id=9606 Gene_Symbol=ALB Isoform 1 of Serum albumin precursor (Doubtful)	1	1	DVFLGMFLYEYAR	NH2-DVFLGM<ox>FLYEYAR-COOH	348	AK	RH	Oxidation of M (6)		Oxidation of M (6: Very Confident)	3	3	100	Doubtful
39	GEPS01035623.1|:561-1340(-)	GEPS01035623.1|:561-1340(-) (Doubtful)	1	1	CVMTEMGITDSHNELDLASMTAH	NH2-C<cmm>VM<ox>TEMGITDSHNELDLASM<ox>TAH-COOH	128	FR	VN	Oxidation of M (20, 3)	Carbamidomethylation of C (1)	Oxidation of M (3: Very Confident, 20: Very Confident)	1	1	100	Doubtful
40	P02768-1 SWISS-PROT:P02768-1 Tax_Id=9606 Gene_Symbol=ALB Isoform 1 of Serum albumin precursor; P02769 SWISS-PROT:P02769 (Bos taurus) Bovine serum albumin precursor	P02768-1 SWISS-PROT:P02768-1 Tax_Id=9606 Gene_Symbol=ALB Isoform 1 of Serum albumin precursor (Doubtful); P02769 SWISS-PROT:P02769 (Bos taurus) Bovine serum albumin precursor (Not Validated)	1	0	FQNALLVR	NH2-FQNALLVR-COOH	427; 426	YK; YG	YT; YT				3	3	100	Doubtful
41	P04264 SWISS-PROT:P04264 Tax_Id=9606 Gene_Symbol=KRT1 Keratin, type II cytoskeletal 1	P04264 SWISS-PROT:P04264 Tax_Id=9606 Gene_Symbol=KRT1 Keratin, type II cytoskeletal 1 (Doubtful)	1	1	TNAENEFVTIK	NH2-TNAENEFVTIK-COOH	278	KR	KD				3	3	100	Doubtful
42	P02768-1 SWISS-PROT:P02768-1 Tax_Id=9606 Gene_Symbol=ALB Isoform 1 of Serum albumin precursor	P02768-1 SWISS-PROT:P02768-1 Tax_Id=9606 Gene_Symbol=ALB Isoform 1 of Serum albumin precursor (Doubtful)	1	1	AEFAEVSK	NH2-AEFAEVSK-COOH	250	PK	LV				3	3	100	Doubtful
43	GEPS01051541.1|:2-1918(+)	GEPS01051541.1|:2-1918(+) (Doubtful)	1	1	NSKGKSAGNPSK	NH2-NSKGKSAGNPSK-COOH	594	GK	AS				1	1	100	Doubtful
44	P02768-1 SWISS-PROT:P02768-1 Tax_Id=9606 Gene_Symbol=ALB Isoform 1 of Serum albumin precursor	P02768-1 SWISS-PROT:P02768-1 Tax_Id=9606 Gene_Symbol=ALB Isoform 1 of Serum albumin precursor (Doubtful)	1	1	QTALVELVK	NH2-QTALVELVK-COOH	550	KK	HK				3	3	100	Doubtful
45	P35908 SWISS-PROT:P35908 Tax_Id=9606 Gene_Symbol=KRT2 Keratin, type II cytoskeletal 2 epidermal	P35908 SWISS-PROT:P35908 Tax_Id=9606 Gene_Symbol=KRT2 Keratin, type II cytoskeletal 2 epidermal (Doubtful)	1	1	YLDGLTAER	NH2-YLDGLTAER-COOH	245	KR	TS				3	3	100	Doubtful
46	P00761 SWISS-PROT:P00761|TRYP_PIG Trypsin - Sus scrofa (Pig).	P00761 SWISS-PROT:P00761|TRYP_PIG Trypsin - Sus scrofa (Pig). (Doubtful)	1	1	VATVSLPR	NH2-VATVSLPR-COOH	108	SR	SC				17	17	100	Doubtful
47	GEPS01035623.1|:561-1340(-)	GEPS01035623.1|:561-1340(-) (Doubtful)	1	1	TAHVNQMQIVGSLK	NH2-TAHVNQM<ox>QIVGSLK-COOH	148	SM	KD	Oxidation of M (7)		Oxidation of M (7: Very Confident)	13	13	100	Doubtful
48	GEPS01035623.1|:561-1340(-)	GEPS01035623.1|:561-1340(-) (Doubtful)	1	1	ITDSHNELDLASMTAHVNQMQIVGSLK	NH2-ITDSHNELDLASMTAHVNQMQIVGSLK-COOH	135	MG	KD				3	3	100	Doubtful
49	GEPS01035623.1|:561-1340(-)	GEPS01035623.1|:561-1340(-) (Doubtful)	1	1	DAYPLPADVVTTQH	NH2-DAYPLPADVVTTQH-COOH	183	NK	YL				9	9	100	Doubtful
50	GEPS01035623.1|:561-1340(-)	GEPS01035623.1|:561-1340(-) (Doubtful)	1	1	GIQEQAGYFR	NH2-GIQEQAGYFR-COOH	118	AK	CV				22	22	100	Doubtful
51	P00761 SWISS-PROT:P00761|TRYP_PIG Trypsin - Sus scrofa (Pig).	P00761 SWISS-PROT:P00761|TRYP_PIG Trypsin - Sus scrofa (Pig). (Doubtful)	1	1	LGEHNIDVLEGNEQF	NH2-LGEHNIDVLEGNEQF-COOH	58	VR	IN				3	3	100	Doubtful
52	P02535-1 SWISS-PROT:P02535-1 Tax_Id=10090 Gene_Symbol=Krt10 Isoform 1 of Keratin, type I cytoskeletal 10; P13645 SWISS-PROT:P13645 Tax_Id=9606 Gene_Symbol=KRT10 Keratin, type I cytoskeletal 10	P02535-1 SWISS-PROT:P02535-1 Tax_Id=10090 Gene_Symbol=Krt10 Isoform 1 of Keratin, type I cytoskeletal 10 (Not Validated); P13645 SWISS-PROT:P13645 Tax_Id=9606 Gene_Symbol=KRT10 Keratin, type I cytoskeletal 10 (Doubtful)	1	0	ALEESNYELEGK	NH2-ALEESNYELEGK-COOH	164; 166	VR; VR	IK; IK				3	3	100	Doubtful
53	P35527 SWISS-PROT:P35527 Tax_Id=9606 Gene_Symbol=KRT9 Keratin, type I cytoskeletal 9	P35527 SWISS-PROT:P35527 Tax_Id=9606 Gene_Symbol=KRT9 Keratin, type I cytoskeletal 9 (Doubtful)	1	1	TLLDIDNTR	NH2-TLLDIDNTR-COOH	225	NK	MT				3	3	100	Doubtful
54	GEPS01035623.1|:561-1340(-)	GEPS01035623.1|:561-1340(-) (Doubtful)	1	1	YPSNVVSDIAK	NH2-YPSNVVSDIAK-COOH	107	IR	GI				33	33	100	Doubtful
55	P00761 SWISS-PROT:P00761|TRYP_PIG Trypsin - Sus scrofa (Pig).	P00761 SWISS-PROT:P00761|TRYP_PIG Trypsin - Sus scrofa (Pig). (Doubtful)	1	1	LGEHNIDVLEGNEQFINA	NH2-LGEHNIDVLEGNEQFINA-COOH	58	VR	AK				3	3	100	Doubtful
56	GEPS01033983.1|:33-410(-)	GEPS01033983.1|:33-410(-) (Doubtful)	1	1	AAAAAVAPEK	ace-AAAAAVAPEK-COOH	2	M	EA	Acetylation of protein N-term (1)			2	2	100	Doubtful
57	GEPS01036704.1|:10-1251(-)	GEPS01036704.1|:10-1251(-) (Doubtful)	1	1	ELESSKCHRK	NH2-ELESSKC<cmm>HRK-COOH	404	RR			Carbamidomethylation of C (7)		1	1	100	Doubtful
58	GEPS01040334.1|:213-941(+)	GEPS01040334.1|:213-941(+) (Doubtful)	1	1	MSNLGLAQHIFDK	NH2-M<ox>SNLGLAQHIFDK-COOH	226	EK	SL	Oxidation of M (1)		Oxidation of M (1: Very Confident)	6	6	100	Doubtful
59	P02768-1 SWISS-PROT:P02768-1 Tax_Id=9606 Gene_Symbol=ALB Isoform 1 of Serum albumin precursor	P02768-1 SWISS-PROT:P02768-1 Tax_Id=9606 Gene_Symbol=ALB Isoform 1 of Serum albumin precursor (Doubtful)	1	1	HPYFYAPELLFFAK	NH2-HPYFYAPELLFFAK-COOH	170	RR	RY				6	6	100	Doubtful
60	GEPS01023158.1|:52-555(+); GEPS01023159.1|:139-642(+)	GEPS01023158.1|:52-555(+), GEPS01023159.1|:139-642(+) (Doubtful)	1	1	HPELTTIPNLHVVK	NH2-HPELTTIPNLHVVK-COOH	32; 32	PK; PK	SM; SM				2	2	100	Doubtful
61	GEPS01054969.1|:2372-2758(-); GEPS01054970.1|:2367-2867(-)	GEPS01054970.1|:2367-2867(-) (Doubtful)	1	1	LKPAQTEEK	NH2-LKPAQTEEK-COOH	29; 29	DK; DK	LA; LA				3	3	100	Doubtful
62	P35908 SWISS-PROT:P35908 Tax_Id=9606 Gene_Symbol=KRT2 Keratin, type II cytoskeletal 2 epidermal	P35908 SWISS-PROT:P35908 Tax_Id=9606 Gene_Symbol=KRT2 Keratin, type II cytoskeletal 2 epidermal (Doubtful)	1	1	NVQDAIADAEQR	NH2-NVQDAIADAEQR-COOH	425	CK	GE				2	2	100	Doubtful
63	GEPS01035623.1|:561-1340(-)	GEPS01035623.1|:561-1340(-) (Doubtful)	1	1	VNQMQIVGSLK	NH2-VNQMQIVGSLK-COOH	151	AH	KD				6	6	100	Doubtful
64	P02768-1 SWISS-PROT:P02768-1 Tax_Id=9606 Gene_Symbol=ALB Isoform 1 of Serum albumin precursor	P02768-1 SWISS-PROT:P02768-1 Tax_Id=9606 Gene_Symbol=ALB Isoform 1 of Serum albumin precursor (Doubtful)	1	1	DVFLGMFLYEYAR	NH2-DVFLGMFLYEYAR-COOH	348	AK	RH				3	3	100	Doubtful
65	GEPS01054055.1|:2392-3720(-)	GEPS01054055.1|:2392-3720(-) (Doubtful)	1	1	VKVCVETLCK	NH2-VKVC<cmm>VETLC<cmm>K-COOH	173	DK	YI		Carbamidomethylation of C (4, 9)		1	5	100	Doubtful
66	GEPS01035623.1|:561-1340(-)	GEPS01035623.1|:561-1340(-) (Doubtful)	1	1	TAHVNQMQIVGSLK	NH2-TAHVNQMQIVGSLK-COOH	148	SM	KD				6	6	100	Doubtful
67	GEPS01054819.1|:63-560(-)	GEPS01054819.1|:63-560(-) (Doubtful)	1	1	WNSWFQVPLPGQVR	NH2-WNSWFQVPLPGQVR-COOH	93	GR	DA				3	3	100	Doubtful
68	GEPS01048854.1|:137-1651(-); GEPS01059956.1|:1-1098(+)	GEPS01048854.1|:137-1651(-) (Not Validated); GEPS01048854.1|:137-1651(-), GEPS01059956.1|:1-1098(+) (Doubtful); GEPS01059956.1|:1-1098(+) (Not Validated)	1	0	YPDHQPMGFPLDR	NH2-YPDHQPM<ox>GFPLDR-COOH	467; 328	EK; EK	RI; RI	Oxidation of M (7)		Oxidation of M (7: Very Confident)	4	4	100	Doubtful
69	GEPS01035623.1|:561-1340(-)	GEPS01035623.1|:561-1340(-) (Doubtful)	1	1	VNQMQIVGSLKK	NH2-VNQMQIVGSLKK-COOH	151	AH	DL				1	1	100	Doubtful
70	GEPS01035623.1|:561-1340(-)	GEPS01035623.1|:561-1340(-) (Doubtful)	1	1	FHQPDVSSNNGVENLFALA	NH2-FHQPDVSSNNGVENLFALA-COOH	79	TK	RK				1	1	100	Doubtful
71	GEPS01035623.1|:561-1340(-)	GEPS01035623.1|:561-1340(-) (Doubtful)	1	1	GITDSHNELDLASMTAHVNQMQIVGSLK	NH2-GITDSHNELDLASM<ox>TAHVNQM<ox>QIVGSLK-COOH	134	EM	KD	Oxidation of M (21, 14)		Oxidation of M (14: Very Confident, 21: Very Confident)	1	1	100	Doubtful
72	P35527 SWISS-PROT:P35527 Tax_Id=9606 Gene_Symbol=KRT9 Keratin, type I cytoskeletal 9	P35527 SWISS-PROT:P35527 Tax_Id=9606 Gene_Symbol=KRT9 Keratin, type I cytoskeletal 9 (Doubtful)	1	1	QEYEQLIAK	NH2-QEYEQLIAK-COOH	328	MR	NR				2	2	100	Doubtful
73	GEPS01030296.1|:56-799(+)	GEPS01030296.1|:56-799(+) (Doubtful)	1	1	FGASISSDQGAQTYFTEDTVR	NH2-FGASISSDQGAQTYFTEDTVR-COOH	82	AD	YL				2	2	100	Doubtful
74	P02535-1 SWISS-PROT:P02535-1 Tax_Id=10090 Gene_Symbol=Krt10 Isoform 1 of Keratin, type I cytoskeletal 10; P13645 SWISS-PROT:P13645 Tax_Id=9606 Gene_Symbol=KRT10 Keratin, type I cytoskeletal 10	P02535-1 SWISS-PROT:P02535-1 Tax_Id=10090 Gene_Symbol=Krt10 Isoform 1 of Keratin, type I cytoskeletal 10 (Not Validated); P13645 SWISS-PROT:P13645 Tax_Id=9606 Gene_Symbol=KRT10 Keratin, type I cytoskeletal 10 (Doubtful)	1	0	QSLEASLAETEGR	NH2-QSLEASLAETEGR-COOH	385; 387	LK; LK	YC; YC				3	3	100	Doubtful
75	GEPS01054969.1|:2372-2758(-); GEPS01054970.1|:2367-2867(-)	GEPS01054970.1|:2367-2867(-) (Doubtful)	1	1	SHQSLFQGIEGFDK	NH2-SHQSLFQGIEGFDK-COOH	51; 89	ER; ER	TS; TS				4	4	100	Doubtful
76	GEPS01030611.1|:239-862(-)	GEPS01030611.1|:239-862(-) (Doubtful)	1	1	ITQLNVEPDGK	NH2-ITQLNVEPDGK-COOH	183	GK	GL				1	1	100	Doubtful
77	P00761 SWISS-PROT:P00761|TRYP_PIG Trypsin - Sus scrofa (Pig).	P00761 SWISS-PROT:P00761|TRYP_PIG Trypsin - Sus scrofa (Pig). (Doubtful)	1	1	SPATLNSR	NH2-SPATLNSR-COOH	100	LS	VA				3	3	100	Doubtful
78	P13645 SWISS-PROT:P13645 Tax_Id=9606 Gene_Symbol=KRT10 Keratin, type I cytoskeletal 10	P13645 SWISS-PROT:P13645 Tax_Id=9606 Gene_Symbol=KRT10 Keratin, type I cytoskeletal 10 (Doubtful)	1	1	SLLEGEGSSGGGGR	NH2-SLLEGEGSSGGGGR-COOH	451	YR	GG				3	3	100	Doubtful
79	GEPS01040334.1|:213-941(+)	GEPS01040334.1|:213-941(+) (Doubtful)	1	1	MSNLGLAQHIFDK	NH2-MSNLGLAQHIFDK-COOH	226	EK	SL				6	6	100	Doubtful
80	GEPS01035623.1|:561-1340(-)	GEPS01035623.1|:561-1340(-) (Doubtful)	1	1	SNVVSDIAK	NH2-SNVVSDIAK-COOH	109	YP	GI				4	4	100	Doubtful
81	GEPS01035623.1|:561-1340(-)	GEPS01035623.1|:561-1340(-) (Doubtful)	1	1	MQIVGSLK	NH2-MQIVGSLK-COOH	154	NQ	KD				2	2	97.8142	Doubtful
82	GEPS01056124.1|:112-1314(+)	GEPS01056124.1|:112-1314(+) (Doubtful)	1	1	AATEHPAVTRFR	NH2-AATEHPAVTRFR-COOH	2	M	EY				3	3	100	Doubtful
83	P02768-1 SWISS-PROT:P02768-1 Tax_Id=9606 Gene_Symbol=ALB Isoform 1 of Serum albumin precursor	P02768-1 SWISS-PROT:P02768-1 Tax_Id=9606 Gene_Symbol=ALB Isoform 1 of Serum albumin precursor (Doubtful)	1	1	KQTALVELVK	NH2-KQTALVELVK-COOH	549	IK	HK				3	3	100	Doubtful
84	ENSEMBL:ENSBTAP00000038253 (Bos taurus) 63 kDa protein; P04264 SWISS-PROT:P04264 Tax_Id=9606 Gene_Symbol=KRT1 Keratin, type II cytoskeletal 1; Q3TTY5 SWISS-PROT:Q3TTY5 Tax_Id=10090 Gene_Symbol=Krt2 Keratin, type II cytoskeletal 2 epidermal	ENSEMBL:ENSBTAP00000038253 (Bos taurus) 63 kDa protein (Not Validated); P04264 SWISS-PROT:P04264 Tax_Id=9606 Gene_Symbol=KRT1 Keratin, type II cytoskeletal 1 (Doubtful); Q3TTY5 SWISS-PROT:Q3TTY5 Tax_Id=10090 Gene_Symbol=Krt2 Keratin, type II cytoskeletal 2 epidermal (Not Validated)	1	0	DYQELMNTK	NH2-DYQELMNTK-COOH	460; 464; 483	LR; LR; LR	LA; LA; LS				3	3	100	Doubtful
85	GEPS01059853.1|:1168-5091(-)	GEPS01059853.1|:1168-5091(-) (Doubtful)	1	1	EQTVSPATVAPNMR	NH2-EQTVSPATVAPNMR-COOH	25	GK	LV				3	3	100	Doubtful
86	P13645 SWISS-PROT:P13645 Tax_Id=9606 Gene_Symbol=KRT10 Keratin, type I cytoskeletal 10; Q148H6 TREMBL:Q148H6 (Bos taurus) Hypothetical protein MGC139876; Q7Z3Y7 SWISS-PROT:Q7Z3Y7 Tax_Id=9606 Gene_Symbol=KRT28 Keratin 25D; Q7Z3Y8 SWISS-PROT:Q7Z3Y8 Tax_Id=9606 Gene_Symbol=KRT27 Keratin, type I cytoskeletal 27; Q7Z3Z0 SWISS-PROT:Q7Z3Z0 Tax_Id=9606 Gene_Symbol=KRT25 Keratin, type I cytoskeletal 25	P13645 SWISS-PROT:P13645 Tax_Id=9606 Gene_Symbol=KRT10 Keratin, type I cytoskeletal 10 (Doubtful); Q148H6 TREMBL:Q148H6 (Bos taurus) Hypothetical protein MGC139876, Q7Z3Y7 SWISS-PROT:Q7Z3Y7 Tax_Id=9606 Gene_Symbol=KRT28 Keratin 25D (Not Validated); Q7Z3Z0 SWISS-PROT:Q7Z3Z0 Tax_Id=9606 Gene_Symbol=KRT25 Keratin, type I cytoskeletal 25 (Not Validated)	1	0	DAEAWFNEK	NH2-DAEAWFNEK-COOH	335; 276; 298; 274; 269	RK; RR; RK; RR; RR	SK; SA; SA; SA; SA				3	3	100	Doubtful
87	P35908 SWISS-PROT:P35908 Tax_Id=9606 Gene_Symbol=KRT2 Keratin, type II cytoskeletal 2 epidermal	P35908 SWISS-PROT:P35908 Tax_Id=9606 Gene_Symbol=KRT2 Keratin, type II cytoskeletal 2 epidermal (Doubtful)	1	1	LNDLEEALQQAK	NH2-LNDLEEALQQAK-COOH	448	NK	ED				3	3	100	Doubtful
88	P02768-1 SWISS-PROT:P02768-1 Tax_Id=9606 Gene_Symbol=ALB Isoform 1 of Serum albumin precursor	P02768-1 SWISS-PROT:P02768-1 Tax_Id=9606 Gene_Symbol=ALB Isoform 1 of Serum albumin precursor (Doubtful)	1	1	LDELRDEGK	NH2-LDELRDEGK-COOH	206	PK	AS				3	3	100	Doubtful
89	GEPS01048369.1|:1589-2107(-); GEPS01048371.1|:1178-1696(-); GEPS01048373.1|:1080-1598(-)	GEPS01048369.1|:1589-2107(-), GEPS01048371.1|:1178-1696(-), GEPS01048373.1|:1080-1598(-) (Doubtful)	1	1	LQGTDPEDVIK	NH2-LQGTDPEDVIK-COOH	94; 94; 94	ER; ER; ER	NA; NA; NA				3	3	100	Doubtful
90	GEPS01035623.1|:561-1340(-)	GEPS01035623.1|:561-1340(-) (Doubtful)	1	1	LMANTIVGPDDFGLYE	NH2-LM<ox>ANTIVGPDDFGLYE-COOH	244	AL		Oxidation of M (2)		Oxidation of M (2: Very Confident)	6	6	100	Doubtful
91	GEPS01035623.1|:561-1340(-)	GEPS01035623.1|:561-1340(-) (Doubtful)	1	1	ASAIRYPSNVVSDIAK	NH2-ASAIRYPSNVVSDIAK-COOH	102	RR	GI				7	7	100	Doubtful
92	GEPS01035623.1|:561-1340(-)	GEPS01035623.1|:561-1340(-) (Doubtful)	1	1	LMANTIVGPDDFGLYE	NH2-LMANTIVGPDDFGLYE-COOH	244	AL					3	3	100	Doubtful
93	P00761 SWISS-PROT:P00761|TRYP_PIG Trypsin - Sus scrofa (Pig).	P00761 SWISS-PROT:P00761|TRYP_PIG Trypsin - Sus scrofa (Pig). (Doubtful)	1	1	IITHPNFNGNTLDNDIMLIK	NH2-IITHPNFNGNTLDNDIMLIK-COOH	78	AK	LS				40	40	100	Doubtful
94	GEPS01030296.1|:56-799(+)	GEPS01030296.1|:56-799(+) (Doubtful)	1	1	AHVDEPSSK	NH2-AHVDEPSSK-COOH	71	SR	AD				3	3	100	Doubtful
95	GEPS01040334.1|:213-941(+)	GEPS01040334.1|:213-941(+) (Doubtful)	1	1	FSNLYTSLEK	NH2-FSNLYTSLEK-COOH	216	RK	MS				3	3	100	Doubtful
96	P00761 SWISS-PROT:P00761|TRYP_PIG Trypsin - Sus scrofa (Pig).	P00761 SWISS-PROT:P00761|TRYP_PIG Trypsin - Sus scrofa (Pig). (Doubtful)	1	1	LGEHNIDVLEGN	NH2-LGEHNIDVLEGN-COOH	58	VR	EQ				3	3	100	Doubtful
97	P00761 SWISS-PROT:P00761|TRYP_PIG Trypsin - Sus scrofa (Pig).	P00761 SWISS-PROT:P00761|TRYP_PIG Trypsin - Sus scrofa (Pig). (Doubtful)	1	1	LGEHNIDVLEGNEQFINAAK	NH2-LGEHNIDVLEGNEQFINAAK-COOH	58	VR	II				36	41	100	Doubtful
98	P04264 SWISS-PROT:P04264 Tax_Id=9606 Gene_Symbol=KRT1 Keratin, type II cytoskeletal 1	P04264 SWISS-PROT:P04264 Tax_Id=9606 Gene_Symbol=KRT1 Keratin, type II cytoskeletal 1 (Doubtful)	1	1	WELLQQVDTSTR	NH2-WELLQQVDTSTR-COOH	212	TK	TH				4	4	100	Doubtful
99	P00761 SWISS-PROT:P00761|TRYP_PIG Trypsin - Sus scrofa (Pig).	P00761 SWISS-PROT:P00761|TRYP_PIG Trypsin - Sus scrofa (Pig). (Doubtful)	1	1	LGEHNIDVLEGNEQFIN	NH2-LGEHNIDVLEGNEQFIN-COOH	58	VR	AA				7	7	100	Doubtful
100	ENSEMBL:ENSBTAP00000038253 (Bos taurus) 63 kDa protein; P04264 SWISS-PROT:P04264 Tax_Id=9606 Gene_Symbol=KRT1 Keratin, type II cytoskeletal 1; Q3TTY5 SWISS-PROT:Q3TTY5 Tax_Id=10090 Gene_Symbol=Krt2 Keratin, type II cytoskeletal 2 epidermal	ENSEMBL:ENSBTAP00000038253 (Bos taurus) 63 kDa protein (Not Validated); P04264 SWISS-PROT:P04264 Tax_Id=9606 Gene_Symbol=KRT1 Keratin, type II cytoskeletal 1 (Doubtful); Q3TTY5 SWISS-PROT:Q3TTY5 Tax_Id=10090 Gene_Symbol=Krt2 Keratin, type II cytoskeletal 2 epidermal (Not Validated)	1	0	DYQELMNTK	NH2-DYQELM<ox>NTK-COOH	460; 464; 483	LR; LR; LR	LA; LA; LS	Oxidation of M (6)		Oxidation of M (6: Very Confident)	3	3	100	Doubtful
101	P00761 SWISS-PROT:P00761|TRYP_PIG Trypsin - Sus scrofa (Pig).	P00761 SWISS-PROT:P00761|TRYP_PIG Trypsin - Sus scrofa (Pig). (Doubtful)	1	1	LGEHNIDVLEGNEQ	NH2-LGEHNIDVLEGNEQ-COOH	58	VR	FI				1	1	100	Doubtful
102	GEPS01035623.1|:561-1340(-)	GEPS01035623.1|:561-1340(-) (Doubtful)	1	1	YPSNVVSDIAKGIQEQAGYFR	NH2-YPSNVVSDIAKGIQEQAGYFR-COOH	107	IR	CV				3	3	100	Doubtful
103	GEPS01053416.1|:455-898(-)	GEPS01053416.1|:455-898(-) (Doubtful)	1	1	MSAAKSTVDLGNPPQADTATR	NH2-MSAAKSTVDLGNPPQADTATR-COOH	123	GR	SR				1	5	100	Doubtful
104	P04264 SWISS-PROT:P04264 Tax_Id=9606 Gene_Symbol=KRT1 Keratin, type II cytoskeletal 1	P04264 SWISS-PROT:P04264 Tax_Id=9606 Gene_Symbol=KRT1 Keratin, type II cytoskeletal 1 (Doubtful)	1	1	AEAESLYQSK	NH2-AEAESLYQSK-COOH	367	SK	YE				3	3	100	Doubtful
105	GEPS01035623.1|:561-1340(-)	GEPS01035623.1|:561-1340(-) (Doubtful)	1	1	LDFLASDRD	NH2-LDFLASDRD-COOH	230	GR	RV				3	3	100	Doubtful
106	P35527 SWISS-PROT:P35527 Tax_Id=9606 Gene_Symbol=KRT9 Keratin, type I cytoskeletal 9	P35527 SWISS-PROT:P35527 Tax_Id=9606 Gene_Symbol=KRT9 Keratin, type I cytoskeletal 9 (Doubtful)	1	1	TYHNLLEGGQEDFESSGAGKIGLGGR	NH2-TYHNLLEGGQEDFESSGAGKIGLGGR-COOH	453	IE	GG				1	1	100	Doubtful
107	P35908 SWISS-PROT:P35908 Tax_Id=9606 Gene_Symbol=KRT2 Keratin, type II cytoskeletal 2 epidermal	P35908 SWISS-PROT:P35908 Tax_Id=9606 Gene_Symbol=KRT2 Keratin, type II cytoskeletal 2 epidermal (Doubtful)	1	1	VDLLNQEIEFLK	NH2-VDLLNQEIEFLK-COOH	309	SK	VL				2	2	100	Doubtful
108	P00761 SWISS-PROT:P00761|TRYP_PIG Trypsin - Sus scrofa (Pig).	P00761 SWISS-PROT:P00761|TRYP_PIG Trypsin - Sus scrofa (Pig). (Doubtful)	1	1	GNTLDNDIMLIK	NH2-GNTLDNDIMLIK-COOH	86	FN	LS				3	3	100	Doubtful
109	GEPS01058494.1|:3-5090(-)	GEPS01058494.1|:3-5090(-) (Doubtful)	1	1	VSLGEYTNPGSSK	NH2-VSLGEYTNPGSSK-COOH	193	QR	TT				1	1	100	Doubtful
110	GEPS01035623.1|:561-1340(-)	GEPS01035623.1|:561-1340(-) (Doubtful)	1	1	CVMTEMGITDSHNELDLASMTAH	NH2-C<cmm>VM<ox>TEMGITDSHNELDLASMTAH-COOH	128	FR	VN	Oxidation of M (3)	Carbamidomethylation of C (1)	Oxidation of M (3: Very Confident)	1	1	100	Doubtful
111	GEPS01035623.1|:561-1340(-)	GEPS01035623.1|:561-1340(-) (Doubtful)	1	1	ELDLASMTAHVNQMQIVGSLK	NH2-ELDLASMTAHVNQMQIVGSLK-COOH	141	HN	KD				5	5	100	Doubtful
112	GEPS01035623.1|:561-1340(-)	GEPS01035623.1|:561-1340(-) (Doubtful)	1	1	FLLDQFNLKGTDGR	NH2-FLLDQFNLKGTDGR-COOH	216	AR	LD				6	6	100	Doubtful
113	P04264 SWISS-PROT:P04264 Tax_Id=9606 Gene_Symbol=KRT1 Keratin, type II cytoskeletal 1	P04264 SWISS-PROT:P04264 Tax_Id=9606 Gene_Symbol=KRT1 Keratin, type II cytoskeletal 1 (Doubtful)	1	1	SISISVAR	NH2-SISISVAR-COOH	75	SK	GG				3	3	100	Doubtful
114	P02768-1 SWISS-PROT:P02768-1 Tax_Id=9606 Gene_Symbol=ALB Isoform 1 of Serum albumin precursor	P02768-1 SWISS-PROT:P02768-1 Tax_Id=9606 Gene_Symbol=ALB Isoform 1 of Serum albumin precursor (Doubtful)	1	1	RHPDYSVVLLLR	NH2-RHPDYSVVLLLR-COOH	361	AR	LA				6	6	100	Doubtful
115	GEPS01030296.1|:56-799(+)	GEPS01030296.1|:56-799(+) (Doubtful)	1	1	MFAIVWAR	NH2-M<ox>FAIVWAR-COOH	229	DK	NV	Oxidation of M (1)		Oxidation of M (1: Very Confident)	1	1	100	Doubtful
116	P00761 SWISS-PROT:P00761|TRYP_PIG Trypsin - Sus scrofa (Pig).	P00761 SWISS-PROT:P00761|TRYP_PIG Trypsin - Sus scrofa (Pig). (Doubtful)	1	1	IITHPNFNGN	NH2-IITHPNFNGN-COOH	78	AK	TL				2	2	100	Doubtful
117	P02768-1 SWISS-PROT:P02768-1 Tax_Id=9606 Gene_Symbol=ALB Isoform 1 of Serum albumin precursor	P02768-1 SWISS-PROT:P02768-1 Tax_Id=9606 Gene_Symbol=ALB Isoform 1 of Serum albumin precursor (Doubtful)	1	1	LVAASQAALGL	NH2-LVAASQAALGL-COOH	599	KK					1	3	100	Doubtful
118	GEPS01035623.1|:561-1340(-)	GEPS01035623.1|:561-1340(-) (Doubtful)	1	1	SHNELDLASMTAHVNQMQIVGSLK	NH2-SHNELDLASMTAHVNQMQIVGSLK-COOH	138	TD	KD				6	6	100	Doubtful
119	P00761 SWISS-PROT:P00761|TRYP_PIG Trypsin - Sus scrofa (Pig).	P00761 SWISS-PROT:P00761|TRYP_PIG Trypsin - Sus scrofa (Pig). (Doubtful)	1	1	TLDNDIMLIK	NH2-TLDNDIM<ox>LIK-COOH	88	GN	LS	Oxidation of M (7)		Oxidation of M (7: Very Confident)	2	2	100	Doubtful
120	P02768-1 SWISS-PROT:P02768-1 Tax_Id=9606 Gene_Symbol=ALB Isoform 1 of Serum albumin precursor	P02768-1 SWISS-PROT:P02768-1 Tax_Id=9606 Gene_Symbol=ALB Isoform 1 of Serum albumin precursor (Doubtful)	1	1	HPDYSVVLLLR	NH2-HPDYSVVLLLR-COOH	362	RR	LA				2	2	100	Doubtful
121	GEPS01030611.1|:239-862(-)	GEPS01030611.1|:239-862(-) (Doubtful)	1	1	VGDALPSVDLFENTPASVVNTGK	NH2-VGDALPSVDLFENTPASVVNTGK-COOH	54	AK	LC				1	1	100	Doubtful
122	O95678 SWISS-PROT:O95678 Tax_Id=9606 Gene_Symbol=KRT75 Keratin, type II cytoskeletal 75; P02538 SWISS-PROT:P02538 Tax_Id=9606 Gene_Symbol=KRT6A Keratin, type II cytoskeletal 6A; P04259 SWISS-PROT:P04259 Tax_Id=9606 Gene_Symbol=KRT6B Keratin, type II cytoskeletal 6B; P13647 SWISS-PROT:P13647 Tax_Id=9606 Gene_Symbol=KRT5 Keratin, type II cytoskeletal 5; P35908 SWISS-PROT:P35908 Tax_Id=9606 Gene_Sym…	O95678 SWISS-PROT:O95678 Tax_Id=9606 Gene_Symbol=KRT75 Keratin, type II cytoskeletal 75 (Not Validated); P02538 SWISS-PROT:P02538 Tax_Id=9606 Gene_Symbol=KRT6A Keratin, type II cytoskeletal 6A (Not Validated); P35908 SWISS-PROT:P35908 Tax_Id=9606 Gene_Symbol=KRT2 Keratin, type II cytoskeletal 2 epidermal (Doubtful); Q8VED5 TREMBL:Q8VED5 Tax_Id=10090 Gene_Symbol=Krt79 Keratin 79 (Not Validated)	1	0	NLDLDSIIAEVK	NH2-NLDLDSIIAEVK-COOH	313; 327; 327; 332; 348; 327; 308; 304	NR; NR; NR; NR; SR; NR; NR; NR	AQ; AQ; AQ; AQ; AQ; AQ; AQ; AQ				3	3	100	Doubtful
123	GEPS01035623.1|:561-1340(-)	GEPS01035623.1|:561-1340(-) (Doubtful)	1	1	MANTIVGPDDFGLYE	NH2-MANTIVGPDDFGLYE-COOH	245	LL					1	2	100	Doubtful
124	P02768-1 SWISS-PROT:P02768-1 Tax_Id=9606 Gene_Symbol=ALB Isoform 1 of Serum albumin precursor; P02769 SWISS-PROT:P02769 (Bos taurus) Bovine serum albumin precursor	P02768-1 SWISS-PROT:P02768-1 Tax_Id=9606 Gene_Symbol=ALB Isoform 1 of Serum albumin precursor (Doubtful); P02769 SWISS-PROT:P02769 (Bos taurus) Bovine serum albumin precursor (Not Validated)	1	0	KVPQVSTPTLVEVSR	NH2-KVPQVSTPTLVEVSR-COOH	438; 437	TK; TR	NL; SL				5	5	100	Doubtful
125	P13645 SWISS-PROT:P13645 Tax_Id=9606 Gene_Symbol=KRT10 Keratin, type I cytoskeletal 10	P13645 SWISS-PROT:P13645 Tax_Id=9606 Gene_Symbol=KRT10 Keratin, type I cytoskeletal 10 (Doubtful)	1	1	YENEVALR	NH2-YENEVALR-COOH	238	LK	QS				2	2	100	Doubtful
126	P04264 SWISS-PROT:P04264 Tax_Id=9606 Gene_Symbol=KRT1 Keratin, type II cytoskeletal 1	P04264 SWISS-PROT:P04264 Tax_Id=9606 Gene_Symbol=KRT1 Keratin, type II cytoskeletal 1 (Doubtful)	1	1	QISNLQQSISDAEQR	pyro-QISNLQQSISDAEQR-COOH	418	KK	GE	Pyrolidone from Q (1)			3	3	100	Doubtful
127	GEPS01035623.1|:561-1340(-)	GEPS01035623.1|:561-1340(-) (Doubtful)	1	1	HVNQMQIVGSLK	NH2-HVNQMQIVGSLK-COOH	150	TA	KD				3	3	100	Doubtful
128	P35527 SWISS-PROT:P35527 Tax_Id=9606 Gene_Symbol=KRT9 Keratin, type I cytoskeletal 9	P35527 SWISS-PROT:P35527 Tax_Id=9606 Gene_Symbol=KRT9 Keratin, type I cytoskeletal 9 (Doubtful)	1	1	EIETYHNLLEGGQEDFESSGAGK	NH2-EIETYHNLLEGGQEDFESSGAGK-COOH	450	EK	IG				2	2	100	Doubtful
129	P04264 SWISS-PROT:P04264 Tax_Id=9606 Gene_Symbol=KRT1 Keratin, type II cytoskeletal 1	P04264 SWISS-PROT:P04264 Tax_Id=9606 Gene_Symbol=KRT1 Keratin, type II cytoskeletal 1 (Doubtful)	1	1	GSGGGSSGGSIGGR	NH2-GSGGGSSGGSIGGR-COOH	603	GR	GS				3	3	100	Doubtful
130	P35908 SWISS-PROT:P35908 Tax_Id=9606 Gene_Symbol=KRT2 Keratin, type II cytoskeletal 2 epidermal	P35908 SWISS-PROT:P35908 Tax_Id=9606 Gene_Symbol=KRT2 Keratin, type II cytoskeletal 2 epidermal (Doubtful)	1	1	TAAENDFVTLK	NH2-TAAENDFVTLK-COOH	282	KR	KD				2	2	100	Doubtful
131	GEPS01035623.1|:561-1340(-)	GEPS01035623.1|:561-1340(-) (Doubtful)	1	1	GTDGRLDFLASDRDR	NH2-GTDGRLDFLASDRDR-COOH	225	LK	VT				3	4	100	Doubtful
132	P13645 SWISS-PROT:P13645 Tax_Id=9606 Gene_Symbol=KRT10 Keratin, type I cytoskeletal 10	P13645 SWISS-PROT:P13645 Tax_Id=9606 Gene_Symbol=KRT10 Keratin, type I cytoskeletal 10 (Doubtful)	1	1	ELTTEIDNNIEQISSYK	NH2-ELTTEIDNNIEQISSYK-COOH	346	SK	SE				3	3	100	Doubtful
133	GEPS01035623.1|:561-1340(-)	GEPS01035623.1|:561-1340(-) (Doubtful)	1	1	LDFLASDRDR	NH2-LDFLASDRDR-COOH	230	GR	VT				27	34	100	Doubtful
134	GEPS01023158.1|:52-555(+); GEPS01023159.1|:139-642(+)	GEPS01023158.1|:52-555(+), GEPS01023159.1|:139-642(+) (Doubtful)	1	1	LTNEGIQYLR	NH2-LTNEGIQYLR-COOH	69; 69	WR; WR	DF; DF				1	1	100	Doubtful
135	GEPS01035623.1|:561-1340(-)	GEPS01035623.1|:561-1340(-) (Doubtful)	1	1	MANTIVGPDDFGLYE	NH2-M<ox>ANTIVGPDDFGLYE-COOH	245	LL		Oxidation of M (1)		Oxidation of M (1: Very Confident)	3	3	100	Doubtful
136	GEPS01048854.1|:137-1651(-); GEPS01059956.1|:1-1098(+)	GEPS01048854.1|:137-1651(-) (Not Validated); GEPS01048854.1|:137-1651(-), GEPS01059956.1|:1-1098(+) (Doubtful); GEPS01059956.1|:1-1098(+) (Not Validated)	1	0	YPDHQPMGFPLDR	NH2-YPDHQPMGFPLDR-COOH	467; 328	EK; EK	RI; RI				7	7	100	Doubtful
137	P02768-1 SWISS-PROT:P02768-1 Tax_Id=9606 Gene_Symbol=ALB Isoform 1 of Serum albumin precursor	P02768-1 SWISS-PROT:P02768-1 Tax_Id=9606 Gene_Symbol=ALB Isoform 1 of Serum albumin precursor (Doubtful)	1	1	AVMDDFAAFVEK	NH2-AVMDDFAAFVEK-COOH	570	LK	CC				3	3	100	Doubtful
138	GEPS01035623.1|:561-1340(-)	GEPS01035623.1|:561-1340(-) (Doubtful)	1	1	VTALLMANTIVGPDDF	NH2-VTALLMANTIVGPDDF-COOH	240	DR	GL				2	3	100	Doubtful
139	P07477 SWISS-PROT:P07477 Tax_Id=9606 Gene_Symbol=PRSS1 Trypsin-1 precursor	P07477 SWISS-PROT:P07477 Tax_Id=9606 Gene_Symbol=PRSS1 Trypsin-1 precursor (Doubtful)	1	1	LGEHNIEVLEGNEQFINAAK	NH2-LGEHNIEVLEGNEQFINAAK-COOH	73	VR	II				4	7	100	Doubtful
140	GEPS01054969.1|:2372-2758(-); GEPS01054970.1|:2367-2867(-)	GEPS01054970.1|:2367-2867(-) (Doubtful)	1	1	GQQALLSGIAGFDSSALK	NH2-GQQALLSGIAGFDSSALK-COOH	89; 127	EK; EK	KT; KT				3	3	100	Doubtful
141	GEPS01040334.1|:213-941(+)	GEPS01040334.1|:213-941(+) (Doubtful)	1	1	TGGNHGDFDADMAHYLEEK	NH2-TGGNHGDFDADMAHYLEEK-COOH	187	KR	LE				9	9	100	Doubtful
142	GEPS01052512.1|:800-3496(-); GEPS01052513.1|:800-2284(-)	GEPS01052512.1|:800-3496(-), GEPS01052513.1|:800-2284(-) (Doubtful)	1	1	AAAAKEAEASSR	NH2-AAAAKEAEASSR-COOH	643; 239	KK; KK	RK; RK				1	1	100	Doubtful
143	P02768-1 SWISS-PROT:P02768-1 Tax_Id=9606 Gene_Symbol=ALB Isoform 1 of Serum albumin precursor	P02768-1 SWISS-PROT:P02768-1 Tax_Id=9606 Gene_Symbol=ALB Isoform 1 of Serum albumin precursor (Doubtful)	1	1	VFDEFKPLVEEPQNLIK	NH2-VFDEFKPLVEEPQNLIK-COOH	397	AK	QN				6	6	100	Doubtful
144	GEPS01035623.1|:561-1340(-)	GEPS01035623.1|:561-1340(-) (Doubtful)	1	1	DFLASDRDR	NH2-DFLASDRDR-COOH	231	RL	VT				6	6	100	Doubtful
145	P02768-1 SWISS-PROT:P02768-1 Tax_Id=9606 Gene_Symbol=ALB Isoform 1 of Serum albumin precursor	P02768-1 SWISS-PROT:P02768-1 Tax_Id=9606 Gene_Symbol=ALB Isoform 1 of Serum albumin precursor (Doubtful)	1	1	RHPYFYAPELLFFAK	NH2-RHPYFYAPELLFFAK-COOH	169	AR	RY				7	7	100	Doubtful
146	P35527 SWISS-PROT:P35527 Tax_Id=9606 Gene_Symbol=KRT9 Keratin, type I cytoskeletal 9	P35527 SWISS-PROT:P35527 Tax_Id=9606 Gene_Symbol=KRT9 Keratin, type I cytoskeletal 9 (Doubtful)	1	1	SGGGGGGGLGSGGSIR	NH2-SGGGGGGGLGSGGSIR-COOH	14	SR	SS				1	1	100	Doubtful
147	GEPS01054969.1|:2372-2758(-); GEPS01054970.1|:2367-2867(-)	GEPS01054970.1|:2367-2867(-) (Doubtful)	1	1	DRPEGHATLMNQLEGFTPDK	NH2-DRPEGHATLMNQLEGFTPDK-COOH	9; 9	QK; QK	LK; LK				4	4	100	Doubtful
148	GEPS01035623.1|:561-1340(-)	GEPS01035623.1|:561-1340(-) (Doubtful)	1	1	CVMTEMGITDSHNELDLASMTAHVNQMQ	NH2-C<cmm>VMTEM<ox>GITDSHNELDLASMTAHVNQMQ-COOH	128	FR	IV	Oxidation of M (6)	Carbamidomethylation of C (1)	Oxidation of M (6: Very Confident)	1	1	100	Doubtful
149	H-INV:HIT000292931 Tax_Id=9606 Gene_Symbol=- Similar to Keratin, type II cytoskeletal 8; P04264 SWISS-PROT:P04264 Tax_Id=9606 Gene_Symbol=KRT1 Keratin, type II cytoskeletal 1; P05787 SWISS-PROT:P05787 Tax_Id=9606 Gene_Symbol=KRT8 Keratin, type II cytoskeletal 8; P08729 SWISS-PROT:P08729 Tax_Id=9606 Gene_Symbol=KRT7 Keratin, type II cytoskeletal 7; P19013 SWISS-PROT:P19013 Tax_Id=9606 Gene_Symbol=…	H-INV:HIT000292931 Tax_Id=9606 Gene_Symbol=- Similar to Keratin, type II cytoskeletal 8 (Not Validated); P04264 SWISS-PROT:P04264 Tax_Id=9606 Gene_Symbol=KRT1 Keratin, type II cytoskeletal 1 (Doubtful); P05787 SWISS-PROT:P05787 Tax_Id=9606 Gene_Symbol=KRT8 Keratin, type II cytoskeletal 8 (Not Validated); P19013 SWISS-PROT:P19013 Tax_Id=9606 Gene_Symbol=KRT4 keratin 4 (Not Validated); Q6NXH9 TREMB…	1	0	LALDIEIATYR	NH2-LALDIEIATYR-COOH	342; 473; 382; 383; 504; 383; 374; 424; 377	VK; TK; VK; VK; VK; VK; VK; MK; TK	KL; TL; KL; KL; KL; KL; KL; KL; KL				1	1	100	Doubtful
150	GEPS01012540.1|:99-557(+)	GEPS01012540.1|:99-557(+) (Doubtful)	1	1	YSQILSNNLETK	NH2-YSQILSNNLETK-COOH	95	GK	LR				3	3	100	Doubtful
151	GEPS01030789.1|:463-2187(+)	GEPS01030789.1|:463-2187(+) (Doubtful)	1	1	NCNLFHGVWRIPNDEIDRPGSFAAHMYR	NH2-NC<cmm>NLFHGVWRIPNDEIDRPGSFAAHMYR-COOH	19	PK	CV		Carbamidomethylation of C (2)		1	6	100	Doubtful
152	GEPS01035623.1|:561-1340(-)	GEPS01035623.1|:561-1340(-) (Doubtful)	1	1	DAYPLPADVVTTQHYLF	NH2-DAYPLPADVVTTQHYLF-COOH	183	NK	CE				10	10	100	Doubtful
153	GEPS01035623.1|:561-1340(-)	GEPS01035623.1|:561-1340(-) (Doubtful)	1	1	KGIQEQAGYFR	NH2-KGIQEQAGYFR-COOH	117	IA	CV				4	4	100	Doubtful
154	A2A4G1 TREMBL:A2A4G1 Tax_Id=10090 Gene_Symbol=Krt15 Keratin complex 1, acidic, gene 15; P02533 SWISS-PROT:P02533 Tax_Id=9606 Gene_Symbol=KRT14 Keratin, type I cytoskeletal 14; P02535-1 SWISS-PROT:P02535-1 Tax_Id=10090 Gene_Symbol=Krt10 Isoform 1 of Keratin, type I cytoskeletal 10; P08779 SWISS-PROT:P08779 Tax_Id=9606 Gene_Symbol=KRT16 Keratin, type I cytoskeletal 16; P13645 SWISS-PROT:P13645 Tax_…	A2A4G1 TREMBL:A2A4G1 Tax_Id=10090 Gene_Symbol=Krt15 Keratin complex 1, acidic, gene 15 (Not Validated); P02533 SWISS-PROT:P02533 Tax_Id=9606 Gene_Symbol=KRT14 Keratin, type I cytoskeletal 14 (Not Validated); P02535-1 SWISS-PROT:P02535-1 Tax_Id=10090 Gene_Symbol=Krt10 Isoform 1 of Keratin, type I cytoskeletal 10 (Not Validated); P08779 SWISS-PROT:P08779 Tax_Id=9606 Gene_Symbol=KRT16 Keratin, type …	1	0	VTMQNLNDR	NH2-VTMQNLNDR-COOH	100; 117; 146; 119; 148; 88; 115; 110; 86; 85; 81; 115	EK; EK; GR; EK; EK; EK; EK; EK; EK; EK; EK; EK	LA; LA; LA; LA; LA; LA; LA; LA; LA; LA; LA; LA				3	3	100	Doubtful
155	P13645 SWISS-PROT:P13645 Tax_Id=9606 Gene_Symbol=KRT10 Keratin, type I cytoskeletal 10	P13645 SWISS-PROT:P13645 Tax_Id=9606 Gene_Symbol=KRT10 Keratin, type I cytoskeletal 10 (Doubtful)	1	1	SQYEQLAEQNR	NH2-SQYEQLAEQNR-COOH	323	MR	KD				2	2	100	Doubtful
156	GEPS01030296.1|:56-799(+)	GEPS01030296.1|:56-799(+) (Doubtful)	1	1	VTANDQLYALYNR	NH2-VTANDQLYALYNR-COOH	25	AR	QK				3	3	100	Doubtful
157	ENSEMBL:ENSBTAP00000038253 (Bos taurus) 63 kDa protein; P04264 SWISS-PROT:P04264 Tax_Id=9606 Gene_Symbol=KRT1 Keratin, type II cytoskeletal 1; P35908 SWISS-PROT:P35908 Tax_Id=9606 Gene_Symbol=KRT2 Keratin, type II cytoskeletal 2 epidermal; Q6IFZ6 SWISS-PROT:Q6IFZ6 Tax_Id=10090 Gene_Symbol=Krt77 Keratin, type II cytoskeletal 1b; Q6NXH9 TREMBL:Q6NXH9 Tax_Id=10090 Gene_Symbol=Krt73 Keratin 73; Q7Z79…	ENSEMBL:ENSBTAP00000038253 (Bos taurus) 63 kDa protein (Not Validated); P04264 SWISS-PROT:P04264 Tax_Id=9606 Gene_Symbol=KRT1 Keratin, type II cytoskeletal 1 (Doubtful); P35908 SWISS-PROT:P35908 Tax_Id=9606 Gene_Symbol=KRT2 Keratin, type II cytoskeletal 2 epidermal (Doubtful); Q6NXH9 TREMBL:Q6NXH9 Tax_Id=10090 Gene_Symbol=Krt73 Keratin 73 (Not Validated); Q7Z794 SWISS-PROT:Q7Z794 Tax_Id=9606 Gene…	2	0	FLEQQNQVLQTK	NH2-FLEQQNQVLQTK-COOH	196; 200; 204; 187; 151; 184; 151	VR; VR; VR; VR; VR; VR; VR	WE; WE; WE; WE; WE; WE; WE				3	3	100	Doubtful
158	P00761 SWISS-PROT:P00761|TRYP_PIG Trypsin - Sus scrofa (Pig).; P07477 SWISS-PROT:P07477 Tax_Id=9606 Gene_Symbol=PRSS1 Trypsin-1 precursor	P00761 SWISS-PROT:P00761|TRYP_PIG Trypsin - Sus scrofa (Pig). (Doubtful); P07477 SWISS-PROT:P07477 Tax_Id=9606 Gene_Symbol=PRSS1 Trypsin-1 precursor (Doubtful)	2	0	NKPGVYTK	NH2-NKPGVYTK-COOH	209; 224	QK; QK	VC; VY				3	3	100	Doubtful
159	GEPS01035623.1|:561-1340(-)	GEPS01035623.1|:561-1340(-) (Doubtful)	1	1	CVMTEMGITDSHNELDLASMTAH	NH2-C<cmm>VM<ox>TEM<ox>GITDSHNELDLASMTAH-COOH	128	FR	VN	Oxidation of M (6, 3)	Carbamidomethylation of C (1)	Oxidation of M (3: Very Confident, 6: Very Confident)	1	1	100	Doubtful
160	P04264 SWISS-PROT:P04264 Tax_Id=9606 Gene_Symbol=KRT1 Keratin, type II cytoskeletal 1	P04264 SWISS-PROT:P04264 Tax_Id=9606 Gene_Symbol=KRT1 Keratin, type II cytoskeletal 1 (Doubtful)	1	1	LNDLEDALQQAK	NH2-LNDLEDALQQAK-COOH	444	NK	ED				3	3	100	Doubtful
161	P02768-1 SWISS-PROT:P02768-1 Tax_Id=9606 Gene_Symbol=ALB Isoform 1 of Serum albumin precursor	P02768-1 SWISS-PROT:P02768-1 Tax_Id=9606 Gene_Symbol=ALB Isoform 1 of Serum albumin precursor (Doubtful)	1	1	DDNPNLPR	NH2-DDNPNLPR-COOH	131	HK	LV				3	3	100	Doubtful
162	GEPS01059853.1|:1168-5091(-)	GEPS01059853.1|:1168-5091(-) (Doubtful)	1	1	TGVVTADQAEK	NH2-TGVVTADQAEK-COOH	146	QR	AL				3	3	100	Doubtful
163	P00761 SWISS-PROT:P00761|TRYP_PIG Trypsin - Sus scrofa (Pig).	P00761 SWISS-PROT:P00761|TRYP_PIG Trypsin - Sus scrofa (Pig). (Doubtful)	1	1	YVNWIQQTIAAN	NH2-YVNWIQQTIAAN-COOH	220	CN					3	3	100	Doubtful
164	P00761 SWISS-PROT:P00761|TRYP_PIG Trypsin - Sus scrofa (Pig).	P00761 SWISS-PROT:P00761|TRYP_PIG Trypsin - Sus scrofa (Pig). (Doubtful)	1	1	IDVLEGNEQFINAAK	NH2-IDVLEGNEQFINAAK-COOH	63	HN	II				2	2	100	Doubtful
165	P35908 SWISS-PROT:P35908 Tax_Id=9606 Gene_Symbol=KRT2 Keratin, type II cytoskeletal 2 epidermal; Q3TTY5 SWISS-PROT:Q3TTY5 Tax_Id=10090 Gene_Symbol=Krt2 Keratin, type II cytoskeletal 2 epidermal	P35908 SWISS-PROT:P35908 Tax_Id=9606 Gene_Symbol=KRT2 Keratin, type II cytoskeletal 2 epidermal (Doubtful); Q3TTY5 SWISS-PROT:Q3TTY5 Tax_Id=10090 Gene_Symbol=Krt2 Keratin, type II cytoskeletal 2 epidermal (Not Validated)	1	0	GFSSGSAVVSGGSR	NH2-GFSSGSAVVSGGSR-COOH	21; 23	FR; FR	RS; RS				2	2	100	Doubtful
166	P00761 SWISS-PROT:P00761|TRYP_PIG Trypsin - Sus scrofa (Pig).	P00761 SWISS-PROT:P00761|TRYP_PIG Trypsin - Sus scrofa (Pig). (Doubtful)	1	1	IITHPNFNGNTLDNDIMLIK	NH2-IITHPNFNGNTLDNDIM<ox>LIK-COOH	78	AK	LS	Oxidation of M (17)		Oxidation of M (17: Very Confident)	53	53	100	Doubtful
167	GEPS01035623.1|:561-1340(-)	GEPS01035623.1|:561-1340(-) (Doubtful)	1	1	FLLDQFNLK	NH2-FLLDQFNLK-COOH	216	AR	GT				61	61	100	Doubtful
168	GEPS01035623.1|:561-1340(-)	GEPS01035623.1|:561-1340(-) (Doubtful)	1	1	SHNELDLASMTAHVNQMQIVGSLK	NH2-SHNELDLASM<ox>TAHVNQMQIVGSLK-COOH	138	TD	KD	Oxidation of M (10)		Oxidation of M (10: Very Confident)	3	3	100	Doubtful
169	GEPS01035623.1|:561-1340(-)	GEPS01035623.1|:561-1340(-) (Doubtful)	1	1	SHNELDLASMTAHVNQMQIVGSLK	NH2-SHNELDLASMTAHVNQM<ox>QIVGSLK-COOH	138	TD	KD	Oxidation of M (17)		Oxidation of M (17: Very Confident)	3	3	100	Doubtful
170	GEPS01040334.1|:213-941(+)	GEPS01040334.1|:213-941(+) (Doubtful)	1	1	TTVVQVNDLHR	NH2-TTVVQVNDLHR-COOH	171	CK	MS				7	7	100	Doubtful
171	P02768-1 SWISS-PROT:P02768-1 Tax_Id=9606 Gene_Symbol=ALB Isoform 1 of Serum albumin precursor	P02768-1 SWISS-PROT:P02768-1 Tax_Id=9606 Gene_Symbol=ALB Isoform 1 of Serum albumin precursor (Doubtful)	1	1	FYAPELLFFAK	NH2-FYAPELLFFAK-COOH	173	PY	RY				3	3	100	Doubtful
172	GEPS01035623.1|:561-1340(-)	GEPS01035623.1|:561-1340(-) (Doubtful)	1	1	PSNVVSDIAK	NH2-PSNVVSDIAK-COOH	108	RY	GI				7	7	100	Doubtful
173	GEPS01035623.1|:561-1340(-)	GEPS01035623.1|:561-1340(-) (Doubtful)	1	1	DAYPLPADVVTTQHYL	NH2-DAYPLPADVVTTQHYL-COOH	183	NK	FC				3	3	100	Doubtful
174	P02768-1 SWISS-PROT:P02768-1 Tax_Id=9606 Gene_Symbol=ALB Isoform 1 of Serum albumin precursor	P02768-1 SWISS-PROT:P02768-1 Tax_Id=9606 Gene_Symbol=ALB Isoform 1 of Serum albumin precursor (Doubtful)	1	1	FKDLGEENFK	NH2-FKDLGEENFK-COOH	35	HR	AL				1	1	100	Doubtful
175	GEPS01035623.1|:561-1340(-)	GEPS01035623.1|:561-1340(-) (Doubtful)	1	1	VTALLMANTIVGPDD	NH2-VTALLMANTIVGPDD-COOH	240	DR	FG				3	3	100	Doubtful
176	GEPS01035623.1|:561-1340(-)	GEPS01035623.1|:561-1340(-) (Doubtful)	1	1	VTALLMANTIVGPDDFGLYE	NH2-VTALLM<ox>ANTIVGPDDFGLYE-COOH	240	DR		Oxidation of M (6)		Oxidation of M (6: Very Confident)	23	28	100	Doubtful
177	GEPS01035623.1|:561-1340(-)	GEPS01035623.1|:561-1340(-) (Doubtful)	1	1	FLASDRDR	NH2-FLASDRDR-COOH	232	LD	VT				3	3	100	Doubtful
178	P04264 SWISS-PROT:P04264 Tax_Id=9606 Gene_Symbol=KRT1 Keratin, type II cytoskeletal 1	P04264 SWISS-PROT:P04264 Tax_Id=9606 Gene_Symbol=KRT1 Keratin, type II cytoskeletal 1 (Doubtful)	1	1	SLVNLGGSK	NH2-SLVNLGGSK-COOH	66	SR	SI				3	3	100	Doubtful
179	GEPS01035623.1|:561-1340(-)	GEPS01035623.1|:561-1340(-) (Doubtful)	1	1	VTALLMANTIVGPD	NH2-VTALLMANTIVGPD-COOH	240	DR	DF				3	3	100	Doubtful

## Sheet: Evi 25 kDa_proteins
	Main Accession	Description	Gene Name	Chromosome	MW [kDa]	Possible Coverage [%]	Coverage [%]	Spectrum Counting	Confidently Localized Modification Sites	# Confidently Localized Modification Sites	Ambiguously Localized Modification Sites	#Ambiguously Localized Modification Sites	Protein Inference	Secondary Accessions	Protein Group	#Validated Peptides	#Peptides	#Unique	#Validated Unique	#Unique to Group	#Validated Unique to Group	#Validated PSMs	#PSMs	Confidence [%]	Validation
15	GEPV01033026.1|:385-1125(-)				27.1964	87.4	59.76	10953.1	Oxidation of M(M121, M163, M169, M228)	Oxidation of M(4)			Single Protein		GEPV01033026.1|:385-1125(-)	47	60	60	47	60	47	365	386	100	Doubtful
48	GEPV01042675.1|:2-5101(-)				188.176	83.71	9.76	1166.41					Single Protein		GEPV01042675.1|:2-5101(-)	36	48	48	36	48	36	258	292	100	Doubtful
43	GEPV01043235.1|:2912-9880(-)				261.622	84.24	15.81	184.997	Oxidation of M(M599)	Oxidation of M(1)			Single Protein		GEPV01043235.1|:2912-9880(-)	30	40	40	30	40	30	98	108	100	Doubtful
32	P02768-1 SWISS-PROT:P02768-1 Tax_Id=9606 Gene_Symbol=ALB Isoform 1 of Serum albumin precursor				69.3215	95.57	26.93	670.542	Oxidation of M(M353)	Oxidation of M(1)			Single Protein		P02768-1 SWISS-PROT:P02768-1 Tax_Id=9606 Gene_Symbol=ALB Isoform 1 of Serum albumin precursor	20	30	28	18	30	20	73	100	100	Doubtful
46	P00761 SWISS-PROT:P00761|TRYP_PIG Trypsin - Sus scrofa (Pig).				24.3938	68.4	33.77	6493.88	Oxidation of M(M94)	Oxidation of M(1)			Single Protein		P00761 SWISS-PROT:P00761|TRYP_PIG Trypsin - Sus scrofa (Pig).	25	27	25	23	25	23	224	238	100	Doubtful
10	GEPV01029219.1|:661-1533(-)				31.662	74.48	70.69	2393.39	Oxidation of M(M106, M108)	Oxidation of M(2)			Single Protein		GEPV01029219.1|:661-1533(-)	21	22	22	21	22	21	101	108	100	Doubtful
33	GEPV01038994.1|:103-2094(-)				75.5222	64.86	28.36	861.893					Single Protein		GEPV01038994.1|:103-2094(-)	19	22	21	18	21	18	62	68	100	Doubtful
35	GEPV01015871.1|:144-884(+)				27.9478	100	60.16	1563.57	Oxidation of M(M27, M161, M219)	Oxidation of M(3)			Single Protein		GEPV01015871.1|:144-884(+)	18	21	20	17	21	18	65	73	100	Doubtful
16	GEPV01033442.1|:40-822(-)				29.3797	88.46	45.77	1903.66	Oxidation of M(M155, M242, M246)	Oxidation of M(3)			Single Protein		GEPV01033442.1|:40-822(-)	17	20	20	17	20	17	80	86	100	Doubtful
14	GEPV01054001.1|:212-940(+)				26.7494	80.99	62.4	2910.37	Oxidation of M(M198, M226)	Oxidation of M(2)			Single Protein		GEPV01054001.1|:212-940(+)	15	18	18	15	18	15	72	76	100	Doubtful
27	GEPV01016592.1|:89-1033(+)				34.0877	82.48	36.62	710.418					Single Protein		GEPV01016592.1|:89-1033(+)	12	15	15	12	15	12	32	41	100	Doubtful
49	GEPV01033624.1|:1089-1775(-)				25.3115	74.12	53.07	2247.78	Oxidation of M(M14, M21, M85)	Oxidation of M(3)			Single Protein		GEPV01033624.1|:1089-1775(-)	14	15	15	14	15	14	46	50	100	Doubtful
5	GEPV01034416.1|:220-2544(+)				88.0625	67.57	3.23	257.725					Single Protein		GEPV01034416.1|:220-2544(+)	1	13	13	1	13	1	5	23	100	Doubtful
34	GEPV01059273.1|:121-921(+)				29.9956	100	46.99	1310.16					Single Protein		GEPV01059273.1|:121-921(+)	12	13	13	12	13	12	38	44	100	Doubtful
23	GEPV01045753.1|:119-760(+)				24.5186	100	40.85	1170					Single Protein		GEPV01045753.1|:119-760(+)	8	11	11	8	11	8	24	28	100	Doubtful
30	GEPV01031197.1|:403-1020(-)				23.6379	100	33.66	1133.72					Single Protein		GEPV01031197.1|:403-1020(-)	9	11	11	9	11	9	26	29	100	Doubtful
19	GEPV01044884.1|:1-735(+)				27.7505	66.12	29.8	1494.34					Single Protein		GEPV01044884.1|:1-735(+)	7	10	9	7	9	7	22	25	100	Doubtful
26	GEPV01032657.1|:2-787(-)				28.2045	89.31	25.19	803.531					Single Protein		GEPV01032657.1|:2-787(-)	7	10	10	7	10	7	19	23	100	Doubtful
22	GEPV01034704.1|:1798-2604(-)				30.0291	61.94	29.1	587.982					Single Protein		GEPV01034704.1|:1798-2604(-)	5	9	9	5	9	5	12	23	100	Doubtful
28	GEPV01037388.1|:90-1652(+)				55.1392	45.49	13.82	523.66					Related Proteins	GEPV01037389.1|:3-1073(+)	GEPV01037388.1|:90-1652(+), GEPV01037389.1|:3-1073(+)	6	9	9	6	9	6	13	19	100	Doubtful
50	GEPV01056980.1|:32-754(-)				25.6657	100	29.17	906.032					Single Protein		GEPV01056980.1|:32-754(-)	7	9	9	7	9	7	21	24	100	Doubtful
1	GEPV01044415.1|:336-1211(+)				32.2781	74.57	19.24	820.978					Single Protein		GEPV01044415.1|:336-1211(+)	4	8	8	4	8	4	12	21	100	Doubtful
18	GEPV01029747.1|:134-1438(-)				49.1814	76.5	3	673.02	Oxidation of M(M403)	Oxidation of M(1)			Single Protein		GEPV01029747.1|:134-1438(-)	2	7	7	2	7	2	11	17	100	Doubtful
37	GEPV01030146.1|:136-1074(+)				35.101	88.46	20.83	996.62					Single Protein		GEPV01030146.1|:136-1074(+)	6	7	7	6	7	6	18	21	100	Doubtful
39	GEPV01043203.1|:1993-3006(-)				37.2279	73	13.95	685.572					Related Proteins	GEPV01043204.1|:1912-2925(-)	GEPV01043203.1|:1993-3006(-), GEPV01043204.1|:1912-2925(-)	4	7	7	4	7	4	11	14	100	Doubtful
42	GEPV01029746.1|:1-813(-)				30.9813	57.56	28.41	1350.61	Oxidation of M(M206)	Oxidation of M(1)			Single Protein		GEPV01029746.1|:1-813(-)	7	7	6	6	6	6	20	20	100	Doubtful
9	GEPV01026995.1|:117-857(+)				27.2273	72.76	11.79	424.646					Single Protein		GEPV01026995.1|:117-857(+)	3	6	6	3	6	3	5	11	100	Doubtful
17	GEPV01029543.1|:600-1619(-)				38.0281	83.78	14.16	677.481					Single Protein		GEPV01029543.1|:600-1619(-)	4	6	6	4	6	4	10	13	100	Doubtful
45	GEPV01040958.1|:520-1881(-)				50.6281	34.44	11.48	1112.81					Single Protein		GEPV01040958.1|:520-1881(-)	6	6	6	6	6	6	17	17	100	Doubtful
3	GEPV01042407.1|:155-985(+)				31.4144	74.64	25	661.873					Related Proteins	GEPV01042413.1|:151-981(+)	GEPV01042407.1|:155-985(+), GEPV01042413.1|:151-981(+)	5	5	5	5	5	5	8	8	100	Doubtful
11	GEPV01018526.1|:90-668(+)				22.0618	100	21.35	927.876					Single Protein		GEPV01018526.1|:90-668(+)	4	5	5	4	5	4	12	13	100	Doubtful
2	GEPV01044254.1|:2509-3285(-)				27.596	56.59	15.89	977.293					Single Protein		GEPV01044254.1|:2509-3285(-)	3	4	4	3	4	3	9	12	100	Doubtful
41	GEPV01023813.1|:136-654(-)				19.5742	83.14	5.81	497.169					Single Protein		GEPV01023813.1|:136-654(-)	1	4	4	1	4	1	5	6	100	Doubtful
47	GEPV01033005.1|:2-391(-)				14.358	53.85	26.92	3054.04					Single Protein		GEPV01033005.1|:2-391(-)	2	4	4	2	4	2	9	11	100	Doubtful
4	GEPV01044885.1|:1-588(+)				22.5379	61.22	4.59	237.536					Single Protein		GEPV01044885.1|:1-588(+)	1	3	2	1	2	1	1	3	100	Doubtful
12	GEPV01018966.1|:158-922(+)				27.9362	88.58	7.09	280.555					Single Protein		GEPV01018966.1|:158-922(+)	2	3	3	2	3	2	4	6	100	Doubtful
21	GEPV01036178.1|:2-1225(+)				45.7531	51.72	4.17	1756.19	Oxidation of M(M285)	Oxidation of M(1)			Single Protein		GEPV01036178.1|:2-1225(+)	1	3	3	1	3	1	13	39	100	Doubtful
25	P07477 SWISS-PROT:P07477 Tax_Id=9606 Gene_Symbol=PRSS1 Trypsin-1 precursor				26.5411	57.49	11.34	696.037					Single Protein		P07477 SWISS-PROT:P07477 Tax_Id=9606 Gene_Symbol=PRSS1 Trypsin-1 precursor	3	3	1	1	1	1	7	8	100	Doubtful
29	GEPV01021055.1|:83-736(+)				24.5984	71.89	14.29	649.006					Single Protein		GEPV01021055.1|:83-736(+)	3	3	3	3	3	3	6	6	100	Doubtful
6	GEPV01032386.1|:318-1157(-)				29.9071	59.86	9.32	426.712					Single Protein		GEPV01032386.1|:318-1157(-)	2	2	2	2	2	2	3	3	100	Doubtful
8	GEPV01033277.1|:337-855(-)				19.1829	100	11.05	386.687					Related Proteins	GEPV01033278.1|:1-804(-), GEPV01034420.1|:1-1101(+), GEPV01042280.1|:118-1503(+), GEPV01042281.1|:118-1503(+), GEPV01042282.1|:118-1251(+), GEPV01042283.1|:118-1506(+)	GEPV01033277.1|:337-855(-), GEPV01033278.1|:1-804(-), GEPV01034420.1|:1-1101(+), GEPV01042280.1|:118-1503(+), GEPV01042281.1|:118-1503(+), GEPV01042282.1|:118-1251(+), GEPV01042283.1|:118-1506(+)	2	2	1	1	2	2	3	3	100	Doubtful
13	GEPV01037740.1|:118-1053(+)				33.2953	65.92	5.79	121.295					Single Protein		GEPV01037740.1|:118-1053(+)	1	2	2	1	2	1	1	2	100	Doubtful
36	GEPV01027768.1|:92-772(+)				25.9154	100	3.98	252.251					Single Protein		GEPV01027768.1|:92-772(+)	1	2	2	1	2	1	2	3	100	Doubtful
38	GEPV01012757.1|:108-938(+)				29.7531	67.03	3.99	235.573					Single Protein		GEPV01012757.1|:108-938(+)	1	2	2	1	2	1	2	4	100	Doubtful
40	GEPV01033571.1|:278-1219(+)				34.2856	56.87	4.47	274.08	Oxidation of M(M108)	Oxidation of M(1)			Related Proteins	GEPV01033572.1|:276-1217(+)	GEPV01033571.1|:278-1219(+), GEPV01033572.1|:276-1217(+)	1	2	2	1	2	1	2	4	100	Doubtful
7	GEPV01023731.1|:372-764(+)				14.9495	68.46	7.69	320.274					Single Protein		GEPV01023731.1|:372-764(+)	1	1	1	1	1	1	1	1	100	Doubtful
20	GEPV01043366.1|:132-719(+)				20.0547	57.95	6.67	504.502					Single Protein		GEPV01043366.1|:132-719(+)	1	1	1	1	1	1	2	2	100	Doubtful
24	GEPV01014151.1|:1-360(+)				12.6389	48.33	24.17	327.636					Single Protein		GEPV01014151.1|:1-360(+)	1	1	1	1	1	1	1	3	100	Doubtful
31	GEPV01016459.1|:79-828(+)				27.5385	84.34	5.62	135.735					Single Protein		GEPV01016459.1|:79-828(+)	1	1	1	1	1	1	1	1	100	Doubtful
44	GEPV01026915.1|:3-356(-)				12.9231	100	7.63	241.562					Single Protein		GEPV01026915.1|:3-356(-)	1	1	1	1	1	1	1	1	98.1818	Doubtful

## Sheet: Evi 25 kDa_peptides
	Protein(s)	Protein Group(s)	#Validated Protein Group(s)	Unique Database	Sequence	Modified Sequence	Position	AAs Before	AAs After	Variable Modifications	Fixed Modifications	Localization Confidence	#Validated PSMs	#PSMs	Confidence [%]	Validation
1	GEPV01054001.1|:212-940(+)	GEPV01054001.1|:212-940(+) (Doubtful)	1	1	SGLGQPIPSPQEATFR	NH2-SGLGQPIPSPQEATFR-COOH	118	LK	NK				5	5	100	Confident
2	GEPV01042675.1|:2-5101(-)	GEPV01042675.1|:2-5101(-) (Doubtful)	1	1	RHSAVSELK	NH2-RHSAVSELK-COOH	40	NK	AN				3	3	100	Confident
3	P00761 SWISS-PROT:P00761|TRYP_PIG Trypsin - Sus scrofa (Pig).	P00761 SWISS-PROT:P00761|TRYP_PIG Trypsin - Sus scrofa (Pig). (Doubtful)	1	1	LSSPATLNSR	NH2-LSSPATLNSR-COOH	98	IK	VA				14	14	100	Confident
4	GEPV01029746.1|:1-813(-); GEPV01038994.1|:103-2094(-)	GEPV01029746.1|:1-813(-) (Doubtful); GEPV01038994.1|:103-2094(-) (Doubtful)	2	0	KGELFFWAH	NH2-KGELFFWAH-COOH	263; 230	DR; DR	HQ				3	3	100	Confident
5	GEPV01033026.1|:385-1125(-)	GEPV01033026.1|:385-1125(-) (Doubtful)	1	1	VNYDALVAEVDTIPGAEPQLK	NH2-VNYDALVAEVDTIPGAEPQLK-COOH	130	DN	TD				5	5	100	Confident
6	GEPV01033026.1|:385-1125(-)	GEPV01033026.1|:385-1125(-) (Doubtful)	1	1	EVDTIPGAEPQLK	NH2-EVDTIPGAEPQLK-COOH	138	VA	TD				3	3	100	Confident
7	GEPV01042675.1|:2-5101(-)	GEPV01042675.1|:2-5101(-) (Doubtful)	1	1	NAEEEPWAINFYK	NH2-NAEEEPWAINFYK-COOH	110	TF	SI				4	4	100	Confident
8	GEPV01054001.1|:212-940(+)	GEPV01054001.1|:212-940(+) (Doubtful)	1	1	STHATVASVSTFLDDHASLYLDHVK	NH2-STHATVASVSTFLDDHASLYLDHVK-COOH	24	EA	SH				7	7	100	Confident
9	GEPV01044884.1|:1-735(+)	GEPV01044884.1|:1-735(+) (Doubtful)	1	1	EVEINAHVSR	NH2-EVEINAHVSR-COOH	134	VK	LN				3	3	100	Confident
10	GEPV01045753.1|:119-760(+)	GEPV01045753.1|:119-760(+) (Doubtful)	1	1	EAAEEANVIGK	NH2-EAAEEANVIGK-COOH	202	AR	K				3	3	100	Confident
11	GEPV01029219.1|:661-1533(-)	GEPV01029219.1|:661-1533(-) (Doubtful)	1	1	GEHVLPPLK	NH2-GEHVLPPLK-COOH	85	EK	YD				3	3	100	Confident
12	GEPV01056980.1|:32-754(-)	GEPV01056980.1|:32-754(-) (Doubtful)	1	1	PAAKPDAAPAAK	NH2-PAAKPDAAPAAK-COOH	22	AK	AP				1	2	100	Confident
13	P02768-1 SWISS-PROT:P02768-1 Tax_Id=9606 Gene_Symbol=ALB Isoform 1 of Serum albumin precursor	P02768-1 SWISS-PROT:P02768-1 Tax_Id=9606 Gene_Symbol=ALB Isoform 1 of Serum albumin precursor (Doubtful)	1	1	TYETTLEK	NH2-TYETTLEK-COOH	376	AK	CC				2	3	100	Confident
14	GEPV01029219.1|:661-1533(-)	GEPV01029219.1|:661-1533(-) (Doubtful)	1	1	NLRPDYVK	NH2-NLRPDYVK-COOH	259	YK	AF				3	4	100	Confident
15	GEPV01033441.1|:40-798(-); GEPV01033442.1|:40-822(-)	GEPV01033442.1|:40-822(-) (Doubtful)	1	1	MEVVASLKK	NH2-MEVVASLKK-COOH	147; 155	NR; NR	DL; DL				1	1	100	Confident
16	GEPV01016592.1|:89-1033(+)	GEPV01016592.1|:89-1033(+) (Doubtful)	1	1	DFLAGGIAAAISK	NH2-DFLAGGIAAAISK-COOH	13	GK	TA				3	3	100	Confident
17	GEPV01038994.1|:103-2094(-)	GEPV01038994.1|:103-2094(-) (Doubtful)	1	1	KGELFFWAHHQLTAR	NH2-KGELFFWAHHQLTAR-COOH	230	DR	FD				6	6	100	Confident
18	GEPV01007839.1|:1-441(-); GEPV01015871.1|:144-884(+)	GEPV01015871.1|:144-884(+) (Doubtful)	1	1	VISSIEQK	NH2-VISSIEQK-COOH	46; 62	WR; WR	TE; TE				6	7	100	Confident
19	GEPV01033624.1|:1089-1775(-)	GEPV01033624.1|:1089-1775(-) (Doubtful)	1	1	FLSGMGVPDSVK	NH2-FLSGM<ox>GVPDSVK-COOH	17	NK	VC	Oxidation of M (5)		Oxidation of M (5: Very Confident)	3	3	100	Confident
20	GEPV01059273.1|:121-921(+)	GEPV01059273.1|:121-921(+) (Doubtful)	1	1	DVVGNVFATR	NH2-DVVGNVFATR-COOH	212	IK	LS				3	3	100	Confident
21	GEPV01044884.1|:1-735(+)	GEPV01044884.1|:1-735(+) (Doubtful)	1	1	KDNNGVIFTFEDGR	NH2-KDNNGVIFTFEDGR-COOH	174	PR	WN				1	1	100	Confident
22	GEPV01033441.1|:40-798(-); GEPV01033442.1|:40-822(-)	GEPV01033442.1|:40-822(-) (Doubtful)	1	1	LDFLANDRER	NH2-LDFLANDRER-COOH	223; 231	GR; GR	VM; VM				8	8	100	Confident
23	GEPV01043235.1|:2912-9880(-)	GEPV01043235.1|:2912-9880(-) (Doubtful)	1	1	MTIQGGGTLGR	NH2-M<ox>TIQGGGTLGR-COOH	599	AK	RE	Oxidation of M (1)		Oxidation of M (1: Very Confident)	1	1	100	Confident
24	GEPV01032386.1|:318-1157(-)	GEPV01032386.1|:318-1157(-) (Doubtful)	1	1	WKPDLELEEAK	NH2-WKPDLELEEAK-COOH	180	TR	LL				2	2	100	Confident
25	GEPV01044254.1|:2509-3285(-)	GEPV01044254.1|:2509-3285(-) (Doubtful)	1	1	HAFLLDSFVQGAVDPQDK	NH2-HAFLLDSFVQGAVDPQDK-COOH	142	LR	AM				3	3	100	Confident
26	GEPV01029219.1|:661-1533(-)	GEPV01029219.1|:661-1533(-) (Doubtful)	1	1	FGSFQDFKDQFSAASVAVK	NH2-FGSFQDFKDQFSAASVAVK-COOH	189	DR	GS				3	4	100	Confident
27	GEPV01033026.1|:385-1125(-)	GEPV01033026.1|:385-1125(-) (Doubtful)	1	1	QTYFTEDTVR	NH2-QTYFTEDTVR-COOH	92	GA	YL				5	5	100	Confident
28	GEPV01037388.1|:90-1652(+); GEPV01037389.1|:3-1073(+)	GEPV01037388.1|:90-1652(+), GEPV01037389.1|:3-1073(+) (Doubtful)	1	1	VGTDEAEFNR	NH2-VGTDEAEFNR-COOH	396; 232	GK; GK	IL; IL				2	2	100	Confident
29	GEPV01015871.1|:144-884(+)	GEPV01015871.1|:144-884(+) (Doubtful)	1	1	SEMQPTHPIR	NH2-SEM<ox>QPTHPIR-COOH	159	AR	LG	Oxidation of M (3)		Oxidation of M (3: Very Confident)	2	2	100	Confident
30	P00761 SWISS-PROT:P00761|TRYP_PIG Trypsin - Sus scrofa (Pig).	P00761 SWISS-PROT:P00761|TRYP_PIG Trypsin - Sus scrofa (Pig). (Doubtful)	1	1	LGEHNIDVLEGNEQFINAA	NH2-LGEHNIDVLEGNEQFINAA-COOH	58	VR	KI				3	3	100	Confident
31	P00761 SWISS-PROT:P00761|TRYP_PIG Trypsin - Sus scrofa (Pig).	P00761 SWISS-PROT:P00761|TRYP_PIG Trypsin - Sus scrofa (Pig). (Doubtful)	1	1	FNGNTLDNDIMLIK	NH2-FNGNTLDNDIMLIK-COOH	84	PN	LS				3	3	100	Confident
32	P00761 SWISS-PROT:P00761|TRYP_PIG Trypsin - Sus scrofa (Pig).	P00761 SWISS-PROT:P00761|TRYP_PIG Trypsin - Sus scrofa (Pig). (Doubtful)	1	1	TLDNDIMLIK	NH2-TLDNDIMLIK-COOH	88	GN	LS				3	3	100	Confident
33	P02768-1 SWISS-PROT:P02768-1 Tax_Id=9606 Gene_Symbol=ALB Isoform 1 of Serum albumin precursor	P02768-1 SWISS-PROT:P02768-1 Tax_Id=9606 Gene_Symbol=ALB Isoform 1 of Serum albumin precursor (Doubtful)	1	1	SLHTLFGDK	NH2-SLHTLFGDK-COOH	89	DK	LC				3	3	100	Confident
34	GEPV01015871.1|:144-884(+)	GEPV01015871.1|:144-884(+) (Doubtful)	1	1	DNLTLWTSDTQAEAEDGNEGEAN	NH2-DNLTLWTSDTQAEAEDGNEGEAN-COOH	224	LR					3	4	100	Confident
35	P02768-1 SWISS-PROT:P02768-1 Tax_Id=9606 Gene_Symbol=ALB Isoform 1 of Serum albumin precursor	P02768-1 SWISS-PROT:P02768-1 Tax_Id=9606 Gene_Symbol=ALB Isoform 1 of Serum albumin precursor (Doubtful)	1	1	DVFLGMFLYEYAR	NH2-DVFLGM<ox>FLYEYAR-COOH	348	AK	RH	Oxidation of M (6)		Oxidation of M (6: Very Confident)	3	3	100	Confident
36	GEPV01038994.1|:103-2094(-)	GEPV01038994.1|:103-2094(-) (Doubtful)	1	1	LSNHLQVVDELYWDRPIYEGFAPHTTYR	NH2-LSNHLQVVDELYWDRPIYEGFAPHTTYR-COOH	250	ER	YG				1	1	100	Confident
37	GEPV01042675.1|:2-5101(-)	GEPV01042675.1|:2-5101(-) (Doubtful)	1	1	VSLFNIPPLK	NH2-VSLFNIPPLK-COOH	125	SI	EA				3	3	100	Confident
38	GEPV01043235.1|:2912-9880(-)	GEPV01043235.1|:2912-9880(-) (Doubtful)	1	1	VNSAIPGWEVLALLGR	NH2-VNSAIPGWEVLALLGR-COOH	565	IR	ID				4	4	100	Confident
39	P00761 SWISS-PROT:P00761|TRYP_PIG Trypsin - Sus scrofa (Pig).	P00761 SWISS-PROT:P00761|TRYP_PIG Trypsin - Sus scrofa (Pig). (Doubtful)	1	1	VATVSLPR	NH2-VATVSLPR-COOH	108	SR	SC				16	17	100	Confident
40	GEPV01033026.1|:385-1125(-)	GEPV01033026.1|:385-1125(-) (Doubtful)	1	1	VDEPNSQADFGASISSGK	NH2-VDEPNSQADFGASISSGK-COOH	72	AK	GA				37	37	100	Confident
41	GEPV01033026.1|:385-1125(-)	GEPV01033026.1|:385-1125(-) (Doubtful)	1	1	AYNEQLQVAK	NH2-AYNEQLQVAK-COOH	51	VR	AT				13	13	100	Confident
42	GEPV01015871.1|:144-884(+)	GEPV01015871.1|:144-884(+) (Doubtful)	1	1	QAFDDAIAELDTLNEDSYK	pyro-QAFDDAIAELDTLNEDSYK-COOH	195	AK	DS	Pyrolidone from Q (1)			2	2	100	Confident
43	GEPV01034704.1|:1798-2604(-); GEPV01034705.1|:1916-2737(-); GEPV01034706.1|:72-899(-)	GEPV01034704.1|:1798-2604(-) (Doubtful)	1	1	FFDNDLNLVPK	NH2-FFDNDLNLVPK-COOH	173; 173; 173	AR; AR; AR	QA; QA; QA				3	3	100	Confident
44	GEPV01044884.1|:1-735(+)	GEPV01044884.1|:1-735(+) (Doubtful)	1	1	GAESSVTVPDIPSFASLIR	NH2-GAESSVTVPDIPSFASLIR-COOH	211	RK	DA				4	4	100	Confident
45	GEPV01016592.1|:89-1033(+)	GEPV01016592.1|:89-1033(+) (Doubtful)	1	1	QVFLGGVDK	NH2-QVFLGGVDK-COOH	99	YK	NK				2	2	100	Confident
46	GEPV01054001.1|:212-940(+)	GEPV01054001.1|:212-940(+) (Doubtful)	1	1	TPAEPQPTEDANGLK	NH2-TPAEPQPTEDANGLK-COOH	103	GR	SG				2	2	100	Confident
47	GEPV01029219.1|:661-1533(-)	GEPV01029219.1|:661-1533(-) (Doubtful)	1	1	KLAELSGIEVDQIR	NH2-KLAELSGIEVDQIR-COOH	14	EK	KN				6	6	100	Confident
48	P00761 SWISS-PROT:P00761|TRYP_PIG Trypsin - Sus scrofa (Pig).	P00761 SWISS-PROT:P00761|TRYP_PIG Trypsin - Sus scrofa (Pig). (Doubtful)	1	1	LGEHNIDVLEGNEQF	NH2-LGEHNIDVLEGNEQF-COOH	58	VR	IN				3	3	100	Confident
49	GEPV01033441.1|:40-798(-); GEPV01033442.1|:40-822(-)	GEPV01033442.1|:40-822(-) (Doubtful)	1	1	YPSNVVSDIAK	NH2-YPSNVVSDIAK-COOH	100; 108	IR; IR	DI; DI				7	7	100	Confident
50	GEPV01033441.1|:40-798(-); GEPV01033442.1|:40-822(-)	GEPV01033442.1|:40-822(-) (Doubtful)	1	1	MEVVASLK	NH2-M<ox>EVVASLK-COOH	147; 155	NR; NR	KD; KD	Oxidation of M (1)		Oxidation of M (1: Very Confident)	11	12	100	Confident
51	GEPV01045753.1|:119-760(+)	GEPV01045753.1|:119-760(+) (Doubtful)	1	1	VDVYSMLIDAR	NH2-VDVYSMLIDAR-COOH	177	KK	ST				2	2	100	Confident
52	P00761 SWISS-PROT:P00761|TRYP_PIG Trypsin - Sus scrofa (Pig).	P00761 SWISS-PROT:P00761|TRYP_PIG Trypsin - Sus scrofa (Pig). (Doubtful)	1	1	LGEHNIDVLEGNEQFINA	NH2-LGEHNIDVLEGNEQFINA-COOH	58	VR	AK				3	3	100	Confident
53	GEPV01054001.1|:212-940(+)	GEPV01054001.1|:212-940(+) (Doubtful)	1	1	SLTYLFTGNAFGDQSVQRPGLAK	NH2-SLTYLFTGNAFGDQSVQRPGLAK-COOH	54	DK	VL				7	7	100	Confident
54	GEPV01033624.1|:1089-1775(-)	GEPV01033624.1|:1089-1775(-) (Doubtful)	1	1	SEEFKEQQESGIESAGQDLAEDLYYMK	NH2-SEEFKEQQESGIESAGQDLAEDLYYMK-COOH	60	SK	QF				3	3	100	Confident
55	GEPV01033026.1|:385-1125(-)	GEPV01033026.1|:385-1125(-) (Doubtful)	1	1	AKVDEPNSQADFGA	NH2-AKVDEPNSQADFGA-COOH	70	SR	SI				3	3	100	Confident
56	GEPV01054001.1|:212-940(+)	GEPV01054001.1|:212-940(+) (Doubtful)	1	1	MSNLGLAQHIFDK	NH2-M<ox>SNLGLAQHIFDK-COOH	226	EK	SL	Oxidation of M (1)		Oxidation of M (1: Very Confident)	6	6	100	Confident
57	GEPV01044254.1|:2509-3285(-)	GEPV01044254.1|:2509-3285(-) (Doubtful)	1	1	LTDGTQLFVVDGLLFSHQEDVKK	NH2-LTDGTQLFVVDGLLFSHQEDVKK-COOH	200	QR	AF				4	5	100	Confident
58	GEPV01056980.1|:32-754(-)	GEPV01056980.1|:32-754(-) (Doubtful)	1	1	INTLIRPDGLK	NH2-INTLIRPDGLK-COOH	208	VK	KA				4	4	100	Confident
59	GEPV01042675.1|:2-5101(-)	GEPV01042675.1|:2-5101(-) (Doubtful)	1	1	LTGVAAAQR	NH2-LTGVAAAQR-COOH	170	HK	EL				17	17	100	Confident
60	P02768-1 SWISS-PROT:P02768-1 Tax_Id=9606 Gene_Symbol=ALB Isoform 1 of Serum albumin precursor	P02768-1 SWISS-PROT:P02768-1 Tax_Id=9606 Gene_Symbol=ALB Isoform 1 of Serum albumin precursor (Doubtful)	1	1	HPYFYAPELLFFAK	NH2-HPYFYAPELLFFAK-COOH	170	RR	RY				8	8	100	Confident
61	GEPV01043235.1|:2912-9880(-)	GEPV01043235.1|:2912-9880(-) (Doubtful)	1	1	IESNSVEIFNLEFK	NH2-IESNSVEIFNLEFK-COOH	719	TK	RG				3	3	100	Confident
62	GEPV01015871.1|:144-884(+)	GEPV01015871.1|:144-884(+) (Doubtful)	1	1	ADKEEQVQR	ace-ADKEEQVQR-COOH	2	M	AK	Acetylation of protein N-term (1)			3	3	100	Confident
63	GEPV01043235.1|:2912-9880(-)	GEPV01043235.1|:2912-9880(-) (Doubtful)	1	1	KDDGYYLR	NH2-KDDGYYLR-COOH	1452	KR	SE				3	3	100	Confident
64	GEPV01043235.1|:2912-9880(-)	GEPV01043235.1|:2912-9880(-) (Doubtful)	1	1	IDRDDLIAYVSGQINEAK	NH2-IDRDDLIAYVSGQINEAK-COOH	581	GR	MT				7	7	100	Confident
65	GEPV01043235.1|:2912-9880(-)	GEPV01043235.1|:2912-9880(-) (Doubtful)	1	1	VIQADVVYNSDGVR	NH2-VIQADVVYNSDGVR-COOH	1550	GK	AR				3	3	100	Confident
66	GEPV01040958.1|:520-1881(-)	GEPV01040958.1|:520-1881(-) (Doubtful)	1	1	ALMYSPIVTK	NH2-ALMYSPIVTK-COOH	419	MR	VN				3	3	100	Confident
67	GEPV01016592.1|:89-1033(+)	GEPV01016592.1|:89-1033(+) (Doubtful)	1	1	LLLQVQHTSK	NH2-LLLQVQHTSK-COOH	36	VK	QI				2	5	100	Confident
68	GEPV01030146.1|:136-1074(+)	GEPV01030146.1|:136-1074(+) (Doubtful)	1	1	ILIAAHGNSLR	NH2-ILIAAHGNSLR-COOH	240	KK	GI				2	4	100	Confident
69	GEPV01038994.1|:103-2094(-)	GEPV01038994.1|:103-2094(-) (Doubtful)	1	1	AIFSLFNEHQR	NH2-AIFSLFNEHQR-COOH	87	QK	AE				7	7	100	Confident
70	GEPV01038994.1|:103-2094(-)	GEPV01038994.1|:103-2094(-) (Doubtful)	1	1	YDANHIEYTLDEAR	NH2-YDANHIEYTLDEAR-COOH	498	PK	WG				6	6	100	Confident
71	GEPV01029747.1|:134-1438(-)	GEPV01029747.1|:134-1438(-) (Doubtful)	1	1	YPDHQPMGFPLDR	NH2-YPDHQPM<ox>GFPLDR-COOH	397	EK	RI	Oxidation of M (7)		Oxidation of M (7: Very Confident)	5	5	100	Confident
72	GEPV01043235.1|:2912-9880(-)	GEPV01043235.1|:2912-9880(-) (Doubtful)	1	1	VEAQGTGNLPTR	NH2-VEAQGTGNLPTR-COOH	776	FK	GS				3	3	100	Confident
73	GEPV01042675.1|:2-5101(-)	GEPV01042675.1|:2-5101(-) (Doubtful)	1	1	QFPLQYVYHYR	NH2-QFPLQYVYHYR-COOH	17	GL	AK				3	3	100	Confident
74	GEPV01034704.1|:1798-2604(-); GEPV01034705.1|:1916-2737(-); GEPV01034706.1|:72-899(-)	GEPV01034704.1|:1798-2604(-) (Doubtful)	1	1	LVILETASEVSDWAAR	NH2-LVILETASEVSDWAAR-COOH	3; 3; 3	MR; MR; MR	YI; YI; YI				2	2	100	Confident
75	GEPV01044415.1|:336-1211(+)	GEPV01044415.1|:336-1211(+) (Doubtful)	1	1	ESIESFEVK	NH2-ESIESFEVK-COOH	214	TK	AS				3	3	100	Confident
76	P00761 SWISS-PROT:P00761|TRYP_PIG Trypsin - Sus scrofa (Pig).	P00761 SWISS-PROT:P00761|TRYP_PIG Trypsin - Sus scrofa (Pig). (Doubtful)	1	1	IITHPNFNGNTLDNDIMLIKLSSPATLNSR	NH2-IITHPNFNGNTLDNDIMLIKLSSPATLNSR-COOH	78	AK	VA				8	9	100	Confident
77	GEPV01044885.1|:1-588(+)	GEPV01044885.1|:1-588(+) (Doubtful)	1	1	DFAYNFDIK	NH2-DFAYNFDIK-COOH	148	HK	SD				1	1	100	Confident
78	GEPV01015871.1|:144-884(+); GEPV01017845.1|:483-1250(-); GEPV01017846.1|:332-1099(-); GEPV01043174.1|:5871-6692(-)	GEPV01015871.1|:144-884(+) (Doubtful)	1	1	DSTLIMQLLR	NH2-DSTLIM<ox>QLLR-COOH	214; 217; 217; 216	YK; YK; YK; YK	DN; DN; DN; DN	Oxidation of M (6)		Oxidation of M (6: Very Confident)	3	3	100	Confident
79	GEPV01045753.1|:119-760(+)	GEPV01045753.1|:119-760(+) (Doubtful)	1	1	TWFNQPAR	NH2-TWFNQPAR-COOH	24	IK	AH				3	3	100	Confident
80	GEPV01056980.1|:32-754(-)	GEPV01056980.1|:32-754(-) (Doubtful)	1	1	LYEINTVK	NH2-LYEINTVK-COOH	200	KK	IN				3	3	99.7549	Confident
81	GEPV01059273.1|:121-921(+)	GEPV01059273.1|:121-921(+) (Doubtful)	1	1	IKDVVGNVFATR	NH2-IKDVVGNVFATR-COOH	210	VR	LS				3	3	100	Confident
82	GEPV01026995.1|:117-857(+)	GEPV01026995.1|:117-857(+) (Doubtful)	1	1	NTEVNSFLEK	NH2-NTEVNSFLEK-COOH	172	SK	KY				2	2	100	Confident
83	P00761 SWISS-PROT:P00761|TRYP_PIG Trypsin - Sus scrofa (Pig).	P00761 SWISS-PROT:P00761|TRYP_PIG Trypsin - Sus scrofa (Pig). (Doubtful)	1	1	SPATLNSR	NH2-SPATLNSR-COOH	100	LS	VA				3	3	100	Confident
84	GEPV01042675.1|:2-5101(-)	GEPV01042675.1|:2-5101(-) (Doubtful)	1	1	LQFPLQYVYHYR	NH2-LQFPLQYVYHYR-COOH	16	SG	AK				22	22	100	Confident
85	GEPV01042675.1|:2-5101(-)	GEPV01042675.1|:2-5101(-) (Doubtful)	1	1	LSDVSFADTNGQR	NH2-LSDVSFADTNGQR-COOH	65	FK	EC				9	9	100	Confident
86	GEPV01033026.1|:385-1125(-)	GEPV01033026.1|:385-1125(-) (Doubtful)	1	1	PFTPALLR	NH2-PFTPALLR-COOH	175	VY	WS				3	3	100	Confident
87	GEPV01059273.1|:121-921(+)	GEPV01059273.1|:121-921(+) (Doubtful)	1	1	LSNVFVIGK	NH2-LSNVFVIGK-COOH	222	TR	GA				3	3	100	Confident
88	GEPV01033277.1|:337-855(-); GEPV01033278.1|:1-804(-); GEPV01034420.1|:1-1101(+); GEPV01042280.1|:118-1503(+); GEPV01042281.1|:118-1503(+); GEPV01042282.1|:118-1251(+); GEPV01042283.1|:118-1506(+)	GEPV01033277.1|:337-855(-), GEPV01033278.1|:1-804(-), GEPV01034420.1|:1-1101(+), GEPV01042280.1|:118-1503(+), GEPV01042281.1|:118-1503(+), GEPV01042282.1|:118-1251(+), GEPV01042283.1|:118-1506(+) (Doubtful)	1	1	IGGIGTVPVGR	NH2-IGGIGTVPVGR-COOH	93; 93; 160; 256; 256; 256; 256	YK; YK; YK; YK; YK; YK; YK	VE; VE; VE; VE; VE; VE; VE				2	2	100	Confident
89	GEPV01029219.1|:661-1533(-)	GEPV01029219.1|:661-1533(-) (Doubtful)	1	1	NQLANAASEAASIQQMAK	NH2-NQLANAASEAASIQQMAK-COOH	29	RK	YV				6	6	100	Confident
90	GEPV01033026.1|:385-1125(-)	GEPV01033026.1|:385-1125(-) (Doubtful)	1	1	IVYPFTPALLR	NH2-IVYPFTPALLR-COOH	172	SD	WS				2	2	100	Confident
91	GEPV01045753.1|:119-760(+)	GEPV01045753.1|:119-760(+) (Doubtful)	1	1	KGEASAEEVQMATQLK	NH2-KGEASAEEVQMATQLK-COOH	135	VK	SK				6	6	100	Confident
92	GEPV01043235.1|:2912-9880(-)	GEPV01043235.1|:2912-9880(-) (Doubtful)	1	1	LDYNVSLGKDEVDITTK	NH2-LDYNVSLGKDEVDITTK-COOH	702	FK	IE				5	5	100	Confident
93	GEPV01033026.1|:385-1125(-)	GEPV01033026.1|:385-1125(-) (Doubtful)	1	1	AMAICLPMSDIVYPFTPALLR	NH2-AM<ox>AIC<cmm>LPM<ox>SDIVYPFTPALLR-COOH	162	CK	WS	Oxidation of M (8, 2)	Carbamidomethylation of C (5)	Oxidation of M (2: Very Confident, 8: Very Confident)	8	8	100	Confident
94	GEPV01012757.1|:108-938(+)	GEPV01012757.1|:108-938(+) (Doubtful)	1	1	GNADNAVTALK	NH2-GNADNAVTALK-COOH	236	MK	TT				2	2	100	Confident
95	GEPV01016592.1|:89-1033(+); GEPV01054087.1|:48-971(-)	GEPV01016592.1|:89-1033(+) (Doubtful)	1	1	YFPTQALNFAFK	NH2-YFPTQALNFAFK-COOH	83; 83	IR; IR	DK; DK				3	3	100	Confident
96	GEPV01026915.1|:3-356(-)	GEPV01026915.1|:3-356(-) (Doubtful)	1	1	LLLPGELAK	NH2-LLLPGELAK-COOH	100	VR	HA				1	1	99.7543	Confident
97	GEPV01059273.1|:121-921(+)	GEPV01059273.1|:121-921(+) (Doubtful)	1	1	TGGVFAPR	NH2-TGGVFAPR-COOH	23	DK	PT				3	3	100	Confident
98	GEPV01042675.1|:2-5101(-)	GEPV01042675.1|:2-5101(-) (Doubtful)	1	1	ALENGLLTFNAEEEPWAINFYK	NH2-ALENGLLTFNAEEEPWAINFYK-COOH	101	PF	SI				11	11	100	Confident
99	GEPV01015871.1|:144-884(+); GEPV01017845.1|:483-1250(-); GEPV01017846.1|:332-1099(-); GEPV01043174.1|:5871-6692(-)	GEPV01015871.1|:144-884(+) (Doubtful)	1	1	DSTLIMQLLR	NH2-DSTLIMQLLR-COOH	214; 217; 217; 216	YK; YK; YK; YK	DN; DN; DN; DN				4	4	100	Confident
100	GEPV01059273.1|:121-921(+)	GEPV01059273.1|:121-921(+) (Doubtful)	1	1	TDPNFPTGIMDVVQIDK	NH2-TDPNFPTGIMDVVQIDK-COOH	78	VR	VS				3	3	100	Confident
101	GEPV01043235.1|:2912-9880(-)	GEPV01043235.1|:2912-9880(-) (Doubtful)	1	1	YNGDLSNLK	NH2-YNGDLSNLK-COOH	838	LK	IG				3	3	100	Confident
102	GEPV01015871.1|:144-884(+)	GEPV01015871.1|:144-884(+) (Doubtful)	1	1	QAFDDAIAELDTLNEDSYK	NH2-QAFDDAIAELDTLNEDSYK-COOH	195	AK	DS				6	6	100	Confident
103	GEPV01043235.1|:2912-9880(-)	GEPV01043235.1|:2912-9880(-) (Doubtful)	1	1	EITVSLVGK	NH2-EITVSLVGK-COOH	1494	DR	EN				3	3	100	Confident
104	GEPV01031197.1|:403-1020(-)	GEPV01031197.1|:403-1020(-) (Doubtful)	1	1	IQLLEEDLER	NH2-IQLLEEDLER-COOH	13	RR	SE				3	4	100	Confident
105	P00761 SWISS-PROT:P00761|TRYP_PIG Trypsin - Sus scrofa (Pig).	P00761 SWISS-PROT:P00761|TRYP_PIG Trypsin - Sus scrofa (Pig). (Doubtful)	1	1	LGEHNIDVLEGN	NH2-LGEHNIDVLEGN-COOH	58	VR	EQ				2	2	100	Confident
106	GEPV01016592.1|:89-1033(+)	GEPV01016592.1|:89-1033(+) (Doubtful)	1	1	GNLANVIR	NH2-GNLANVIR-COOH	75	WR	YF				2	3	100	Confident
107	GEPV01038994.1|:103-2094(-)	GEPV01038994.1|:103-2094(-) (Doubtful)	1	1	FQMDFTGSK	NH2-FQMDFTGSK-COOH	183	GR	KN				3	3	100	Confident
108	GEPV01042675.1|:2-5101(-)	GEPV01042675.1|:2-5101(-) (Doubtful)	1	1	HSAVSELK	NH2-HSAVSELK-COOH	41	KR	AN				10	10	100	Confident
109	GEPV01033624.1|:1089-1775(-)	GEPV01033624.1|:1089-1775(-) (Doubtful)	1	1	IEIADGPLK	NH2-IEIADGPLK-COOH	109	DK	EF				3	3	100	Confident
110	GEPV01032657.1|:2-787(-)	GEPV01032657.1|:2-787(-) (Doubtful)	1	1	VLASEDPDLR	NH2-VLASEDPDLR-COOH	194	FK	VL				3	3	100	Confident
111	GEPV01029746.1|:1-813(-)	GEPV01029746.1|:1-813(-) (Doubtful)	1	1	INEPLGFPELK	NH2-INEPLGFPELK-COOH	68	YR	AA				3	3	100	Confident
112	GEPV01056980.1|:32-754(-)	GEPV01056980.1|:32-754(-) (Doubtful)	1	1	KLYEINTVK	NH2-KLYEINTVK-COOH	199	VK	IN				3	3	100	Confident
113	GEPV01038994.1|:103-2094(-)	GEPV01038994.1|:103-2094(-) (Doubtful)	1	1	LFTNSEVINK	NH2-LFTNSEVINK-COOH	161	PH	AY				3	3	100	Confident
114	GEPV01037740.1|:118-1053(+)	GEPV01037740.1|:118-1053(+) (Doubtful)	1	1	AAPPHTIFASNTSSLPIK	NH2-AAPPHTIFASNTSSLPIK-COOH	135	DK	DI				1	1	100	Confident
115	GEPV01040958.1|:520-1881(-)	GEPV01040958.1|:520-1881(-) (Doubtful)	1	1	QIVFDPNHR	NH2-QIVFDPNHR-COOH	383	VR	NA				3	3	100	Confident
116	GEPV01038994.1|:103-2094(-)	GEPV01038994.1|:103-2094(-) (Doubtful)	1	1	EVATTWNPR	NH2-EVATTWNPR-COOH	49	LK	DH				3	3	100	Confident
117	GEPV01044415.1|:336-1211(+)	GEPV01044415.1|:336-1211(+) (Doubtful)	1	1	ASAPPGYILNIEQAIGR	NH2-ASAPPGYILNIEQAIGR-COOH	223	VK	CG				3	3	100	Confident
118	GEPV01033026.1|:385-1125(-)	GEPV01033026.1|:385-1125(-) (Doubtful)	1	1	EPNSQADFGASISSGK	NH2-EPNSQADFGASISSGK-COOH	74	VD	GA				3	3	100	Confident
119	GEPV01032657.1|:2-787(-)	GEPV01032657.1|:2-787(-) (Doubtful)	1	1	QGTLLSAGQSIAK	NH2-QGTLLSAGQSIAK-COOH	239	HR	LL				3	3	100	Confident
120	GEPV01042407.1|:155-985(+); GEPV01042413.1|:151-981(+)	GEPV01042407.1|:155-985(+), GEPV01042413.1|:151-981(+) (Doubtful)	1	1	ALYMGDNDFEVLSTDIK	NH2-ALYMGDNDFEVLSTDIK-COOH	138; 138	LR; LR	NF; NF				1	1	100	Confident
121	GEPV01059273.1|:121-921(+)	GEPV01059273.1|:121-921(+) (Doubtful)	1	1	INDTIVYDLK	NH2-INDTIVYDLK-COOH	156	IR	ES				3	3	100	Confident
122	GEPV01033441.1|:40-798(-); GEPV01033442.1|:40-822(-)	GEPV01033442.1|:40-822(-) (Doubtful)	1	1	QTQINLEFEFLNR	pyro-QTQINLEFEFLNR-COOH	34; 34	MA; MA	FD; FD	Pyrolidone from Q (1)			4	4	100	Confident
123	GEPV01033026.1|:385-1125(-)	GEPV01033026.1|:385-1125(-) (Doubtful)	1	1	MFALVWAR	NH2-M<ox>FALVWAR-COOH	228	DK	NV	Oxidation of M (1)		Oxidation of M (1: Very Confident)	42	43	100	Confident
124	GEPV01029746.1|:1-813(-)	GEPV01029746.1|:1-813(-) (Doubtful)	1	1	HHWFSLFNTR	NH2-HHWFSLFNTR-COOH	116	EQ	QR				2	2	100	Confident
125	GEPV01033026.1|:385-1125(-)	GEPV01033026.1|:385-1125(-) (Doubtful)	1	1	VDEPNSQADFGASISSGKGAQTYFTEDTVR	NH2-VDEPNSQADFGASISSGKGAQTYFTEDTVR-COOH	72	AK	YL				3	3	100	Confident
126	GEPV01023731.1|:372-764(+)	GEPV01023731.1|:372-764(+) (Doubtful)	1	1	VGDIYWNFEK	NH2-VGDIYWNFEK-COOH	62	LK	FL				1	1	100	Confident
127	GEPV01033441.1|:40-798(-); GEPV01033442.1|:40-822(-)	GEPV01033442.1|:40-822(-) (Doubtful)	1	1	FLVEQFDLK	NH2-FLVEQFDLK-COOH	209; 217	AR; AR	GT; GT				7	7	100	Confident
128	P00761 SWISS-PROT:P00761|TRYP_PIG Trypsin - Sus scrofa (Pig).	P00761 SWISS-PROT:P00761|TRYP_PIG Trypsin - Sus scrofa (Pig). (Doubtful)	1	1	IITHPNFNGN	NH2-IITHPNFNGN-COOH	78	AK	TL				3	3	100	Confident
129	GEPV01033026.1|:385-1125(-)	GEPV01033026.1|:385-1125(-) (Doubtful)	1	1	MDEFDNVNYDALVAEVDTIPGAEPQLK	NH2-MDEFDNVNYDALVAEVDTIPGAEPQLK-COOH	124	GY	TD				3	3	100	Confident
130	GEPV01042407.1|:155-985(+); GEPV01042413.1|:151-981(+)	GEPV01042407.1|:155-985(+), GEPV01042413.1|:151-981(+) (Doubtful)	1	1	ENDLVELPR	NH2-ENDLVELPR-COOH	166; 166	MR; MR	EV; EV				3	3	100	Confident
131	GEPV01030146.1|:136-1074(+)	GEPV01030146.1|:136-1074(+) (Doubtful)	1	1	FDVAHTSVLTR	NH2-FDVAHTSVLTR-COOH	110	YK	AN				6	6	100	Confident
132	GEPV01029219.1|:661-1533(-)	GEPV01029219.1|:661-1533(-) (Doubtful)	1	1	FGSFQDFK	NH2-FGSFQDFK-COOH	189	DR	DQ				3	3	100	Confident
133	GEPV01043235.1|:2912-9880(-)	GEPV01043235.1|:2912-9880(-) (Doubtful)	1	1	NDISYNFTGQAQVK	NH2-NDISYNFTGQAQVK-COOH	1323	KR	SD				3	3	100	Confident
134	P02768-1 SWISS-PROT:P02768-1 Tax_Id=9606 Gene_Symbol=ALB Isoform 1 of Serum albumin precursor	P02768-1 SWISS-PROT:P02768-1 Tax_Id=9606 Gene_Symbol=ALB Isoform 1 of Serum albumin precursor (Doubtful)	1	1	HPDYSVVLLLR	NH2-HPDYSVVLLLR-COOH	362	RR	LA				3	3	100	Confident
135	GEPV01033026.1|:385-1125(-)	GEPV01033026.1|:385-1125(-) (Doubtful)	1	1	YNEQLQVAK	NH2-YNEQLQVAK-COOH	52	RA	AT				4	4	100	Confident
136	GEPV01033276.1|:222-1049(-); GEPV01033277.1|:337-855(-); GEPV01033278.1|:1-804(-); GEPV01033279.1|:337-1305(-); GEPV01034420.1|:1-1101(+); GEPV01042280.1|:118-1503(+); GEPV01042281.1|:118-1503(+); GEPV01042282.1|:118-1251(+); GEPV01042283.1|:118-1506(+)	GEPV01033276.1|:222-1049(-) (Not Validated); GEPV01033277.1|:337-855(-), GEPV01033278.1|:1-804(-), GEPV01034420.1|:1-1101(+), GEPV01042280.1|:118-1503(+), GEPV01042281.1|:118-1503(+), GEPV01042282.1|:118-1251(+), GEPV01042283.1|:118-1506(+) (Doubtful)	1	0	LPLQDVYK	NH2-LPLQDVYK-COOH	188; 85; 85; 235; 152; 248; 248; 248; 248	LR; LR; LR; LR; LR; LR; LR; LR; LR	IS; IG; IG; IS; IG; IG; IG; IG; IG				1	1	100	Confident
137	GEPV01018526.1|:90-668(+)	GEPV01018526.1|:90-668(+) (Doubtful)	1	1	YQDLYAQFISNPDEK	NH2-YQDLYAQFISNPDEK-COOH	165	TR	CN				3	3	100	Confident
138	GEPV01015871.1|:144-884(+)	GEPV01015871.1|:144-884(+) (Doubtful)	1	1	YLAEVATGEAR	NH2-YLAEVATGEAR-COOH	129	YR	AG				6	6	100	Confident
139	GEPV01033026.1|:385-1125(-)	GEPV01033026.1|:385-1125(-) (Doubtful)	1	1	LVAEVDTIPGAEPQLK	NH2-LVAEVDTIPGAEPQLK-COOH	135	DA	TD				1	1	100	Confident
140	GEPV01059273.1|:121-921(+)	GEPV01059273.1|:121-921(+) (Doubtful)	1	1	GVPIIITSDAR	NH2-GVPIIITSDAR-COOH	135	PK	TI				3	3	100	Confident
141	GEPV01030146.1|:136-1074(+)	GEPV01030146.1|:136-1074(+) (Doubtful)	1	1	FLGDEETVR	NH2-FLGDEETVR-COOH	291	MK	KA				3	3	100	Confident
142	GEPV01033026.1|:385-1125(-)	GEPV01033026.1|:385-1125(-) (Doubtful)	1	1	DIVYPFTPALLR	NH2-DIVYPFTPALLR-COOH	171	MS	WS				3	3	100	Confident
143	GEPV01033571.1|:278-1219(+); GEPV01033572.1|:276-1217(+)	GEPV01033571.1|:278-1219(+), GEPV01033572.1|:276-1217(+) (Doubtful)	1	1	VMESSDEELGSEAR	NH2-VM<ox>ESSDEELGSEAR-COOH	107; 107	ER; ER	QQ; QQ	Oxidation of M (2)		Oxidation of M (2: Very Confident)	2	2	100	Doubtful
144	GEPV01040958.1|:520-1881(-)	GEPV01040958.1|:520-1881(-) (Doubtful)	1	1	WQWTQADLGLVK	NH2-WQWTQADLGLVK-COOH	348	RK	HK				3	3	100	Confident
145	P00761 SWISS-PROT:P00761|TRYP_PIG Trypsin - Sus scrofa (Pig).	P00761 SWISS-PROT:P00761|TRYP_PIG Trypsin - Sus scrofa (Pig). (Doubtful)	1	1	NIDVLEGNEQFINAAK	NH2-NIDVLEGNEQFINAAK-COOH	62	EH	II				2	2	100	Confident
146	GEPV01029746.1|:1-813(-)	GEPV01029746.1|:1-813(-) (Doubtful)	1	1	AAADNFNPVADTSLYSDGGK	NH2-AAADNFNPVADTSLYSDGGK-COOH	79	LK	AV				3	3	100	Confident
147	GEPV01033624.1|:1089-1775(-)	GEPV01033624.1|:1089-1775(-) (Doubtful)	1	1	EQQESGIESAGQDLAEDLYYMK	NH2-EQQESGIESAGQDLAEDLYYMK-COOH	65	FK	QF				4	4	100	Confident
148	GEPV01042675.1|:2-5101(-)	GEPV01042675.1|:2-5101(-) (Doubtful)	1	1	GIPDINKR	NH2-GIPDINKR-COOH	33	SS	HS				2	3	100	Confident
149	GEPV01043235.1|:2912-9880(-)	GEPV01043235.1|:2912-9880(-) (Doubtful)	1	1	VGFETAEFVFHR	NH2-VGFETAEFVFHR-COOH	758	HR	NQ				6	6	100	Confident
150	GEPV01033441.1|:40-798(-); GEPV01033442.1|:40-822(-)	GEPV01033442.1|:40-822(-) (Doubtful)	1	1	LDFLANDR	NH2-LDFLANDR-COOH	223; 231	GR; GR	ER; ER				6	6	100	Confident
151	GEPV01043235.1|:2912-9880(-)	GEPV01043235.1|:2912-9880(-) (Doubtful)	1	1	IVTVGIGEDR	NH2-IVTVGIGEDR-COOH	1484	SR	EI				3	3	100	Confident
152	GEPV01032657.1|:2-787(-)	GEPV01032657.1|:2-787(-) (Doubtful)	1	1	VLNYAPGPLDTDMQK	NH2-VLNYAPGPLDTDMQK-COOH	204	LR	TA				3	3	100	Confident
153	GEPV01034704.1|:1798-2604(-)	GEPV01034704.1|:1798-2604(-) (Doubtful)	1	1	NLWQVHSELIEG	NH2-NLWQVHSELIEG-COOH	257	FK					1	2	100	Confident
154	GEPV01054001.1|:212-940(+)	GEPV01054001.1|:212-940(+) (Doubtful)	1	1	AFGDQSVQRPGLAK	NH2-AFGDQSVQRPGLAK-COOH	63	GN	VL				1	1	100	Confident
155	GEPV01016459.1|:79-828(+)	GEPV01016459.1|:79-828(+) (Doubtful)	1	1	LTVEDPVTLEYITR	NH2-LTVEDPVTLEYITR-COOH	98	HK	FI				1	1	100	Confident
156	GEPV01018966.1|:158-922(+)	GEPV01018966.1|:158-922(+) (Doubtful)	1	1	VFQVEYAQK	NH2-VFQVEYAQK-COOH	21	GR	AV				3	3	100	Confident
157	GEPV01059273.1|:121-921(+)	GEPV01059273.1|:121-921(+) (Doubtful)	1	1	ESLPVVLILR	NH2-ESLPVVLILR-COOH	40	LR	NR				3	3	100	Confident
158	GEPV01033026.1|:385-1125(-)	GEPV01033026.1|:385-1125(-) (Doubtful)	1	1	VDTIPGAEPQLK	NH2-VDTIPGAEPQLK-COOH	139	AE	TD				3	3	100	Confident
159	GEPV01033026.1|:385-1125(-)	GEPV01033026.1|:385-1125(-) (Doubtful)	1	1	GAQTYFTEDTVR	NH2-GAQTYFTEDTVR-COOH	90	GK	YL				41	42	100	Confident
160	P02768-1 SWISS-PROT:P02768-1 Tax_Id=9606 Gene_Symbol=ALB Isoform 1 of Serum albumin precursor	P02768-1 SWISS-PROT:P02768-1 Tax_Id=9606 Gene_Symbol=ALB Isoform 1 of Serum albumin precursor (Doubtful)	1	1	AVMDDFAAFVEK	NH2-AVMDDFAAFVEK-COOH	570	LK	CC				3	3	100	Confident
161	GEPV01038994.1|:103-2094(-)	GEPV01038994.1|:103-2094(-) (Doubtful)	1	1	AVEALLEEIEAGR	NH2-AVEALLEEIEAGR-COOH	69	GK	VL				3	3	100	Confident
162	P07477 SWISS-PROT:P07477 Tax_Id=9606 Gene_Symbol=PRSS1 Trypsin-1 precursor	P07477 SWISS-PROT:P07477 Tax_Id=9606 Gene_Symbol=PRSS1 Trypsin-1 precursor (Doubtful)	1	1	LGEHNIEVLEGNEQFINAAK	NH2-LGEHNIEVLEGNEQFINAAK-COOH	73	VR	II				3	4	100	Confident
163	GEPV01037388.1|:90-1652(+); GEPV01037389.1|:3-1073(+)	GEPV01037388.1|:90-1652(+), GEPV01037389.1|:3-1073(+) (Doubtful)	1	1	ILASYSYPLLR	NH2-ILASYSYPLLR-COOH	406; 242	NR; NR	AV; AV				3	3	100	Confident
164	GEPV01031197.1|:403-1020(-)	GEPV01031197.1|:403-1020(-) (Doubtful)	1	1	IVELEEELR	NH2-IVELEEELR-COOH	111	SK	VV				3	3	100	Confident
165	GEPV01054001.1|:212-940(+)	GEPV01054001.1|:212-940(+) (Doubtful)	1	1	TGGNHGDFDADMAHYLEEK	NH2-TGGNHGDFDADMAHYLEEK-COOH	187	KR	IE				9	9	100	Confident
166	GEPV01043152.1|:118-1254(+); GEPV01043155.1|:3-1661(+)	GEPV01043152.1|:118-1254(+), GEPV01043155.1|:3-1661(+) (Not Validated); GEPV01043155.1|:3-1661(+) (Not Validated)	0	0	AAAAKEAEASSR	NH2-AAAAKEAEASSR-COOH	123; 297	KK; KK	RK; RK				3	3	99.7537	Confident
167	GEPV01033026.1|:385-1125(-)	GEPV01033026.1|:385-1125(-) (Doubtful)	1	1	FGASISSGK	NH2-FGASISSGK-COOH	81	AD	GA				2	2	100	Confident
168	GEPV01029746.1|:1-813(-)	GEPV01029746.1|:1-813(-) (Doubtful)	1	1	AYTAQMTQTPGKFN	NH2-AYTAQM<ox>TQTPGKFN-COOH	201	SK	MD	Oxidation of M (6)		Oxidation of M (6: Very Confident)	3	3	100	Confident
169	GEPV01044884.1|:1-735(+)	GEPV01044884.1|:1-735(+) (Doubtful)	1	1	KGAESSVTVPDIPSFASLIR	NH2-KGAESSVTVPDIPSFASLIR-COOH	210	KR	DA				5	5	100	Confident
170	GEPV01054001.1|:212-940(+)	GEPV01054001.1|:212-940(+) (Doubtful)	1	1	HWNLGIDALK	NH2-HWNLGIDALK-COOH	85	DR	KY				4	4	100	Confident
171	GEPV01043235.1|:2912-9880(-)	GEPV01043235.1|:2912-9880(-) (Doubtful)	1	1	TVSVHIDVDR	NH2-TVSVHIDVDR-COOH	804	PR	SG				6	6	100	Confident
172	GEPV01042407.1|:155-985(+); GEPV01042413.1|:151-981(+)	GEPV01042407.1|:155-985(+), GEPV01042413.1|:151-981(+) (Doubtful)	1	1	LQVLPPEIGSLDLLGSK	NH2-LQVLPPEIGSLDLLGSK-COOH	192; 192	NR; NR	SC; SC				1	1	100	Confident
173	GEPV01033026.1|:385-1125(-)	GEPV01033026.1|:385-1125(-) (Doubtful)	1	1	AKVDEPNSQADFGASISSGK	NH2-AKVDEPNSQADFGASISSGK-COOH	70	SR	GA				38	38	100	Confident
174	GEPV01033441.1|:40-798(-); GEPV01033442.1|:40-822(-)	GEPV01033442.1|:40-822(-) (Doubtful)	1	1	DAYPLPADVVTTQHYLF	NH2-DAYPLPADVVTTQHYLF-COOH	176; 184	NK; NK	CE; CE				3	3	100	Confident
175	GEPV01043235.1|:2912-9880(-)	GEPV01043235.1|:2912-9880(-) (Doubtful)	1	1	GSIDAVINNSFR	NH2-GSIDAVINNSFR-COOH	788	TR	EI				3	3	100	Confident
176	GEPV01054001.1|:212-940(+)	GEPV01054001.1|:212-940(+) (Doubtful)	1	1	SLTYLFTGNAFGDQSVQR	NH2-SLTYLFTGNAFGDQSVQR-COOH	54	DK	PG				5	5	100	Confident
177	GEPV01038994.1|:103-2094(-)	GEPV01038994.1|:103-2094(-) (Doubtful)	1	1	QQAINQLLLK	NH2-QQAINQLLLK-COOH	26	VK	VT				3	4	100	Confident
178	GEPV01042675.1|:2-5101(-)	GEPV01042675.1|:2-5101(-) (Doubtful)	1	1	LFGDHHVTR	NH2-LFGDHHVTR-COOH	180	RE	DV				5	5	100	Confident
179	GEPV01033026.1|:385-1125(-)	GEPV01033026.1|:385-1125(-) (Doubtful)	1	1	AKVDEPNSQADFGAS	NH2-AKVDEPNSQADFGAS-COOH	70	SR	IS				5	5	100	Confident
180	GEPV01029219.1|:661-1533(-)	GEPV01029219.1|:661-1533(-) (Doubtful)	1	1	MAPNTSGTAPEPAGELLQAINDR	NH2-MAPNTSGTAPEPAGELLQAINDR-COOH	166	TN	FG				3	3	100	Confident
181	GEPV01030146.1|:136-1074(+)	GEPV01030146.1|:136-1074(+) (Doubtful)	1	1	HYGGLTGLNK	NH2-HYGGLTGLNK-COOH	149	ER	AE				2	2	100	Confident
182	GEPV01045753.1|:119-760(+)	GEPV01045753.1|:119-760(+) (Doubtful)	1	1	PLGLLRPIVR	NH2-PLGLLRPIVR-COOH	50	PR	SA				3	3	100	Confident
183	GEPV01015871.1|:144-884(+)	GEPV01015871.1|:144-884(+) (Doubtful)	1	1	SEMQPTHPIR	NH2-SEMQPTHPIR-COOH	159	AR	LG				5	5	100	Confident
184	P00761 SWISS-PROT:P00761|TRYP_PIG Trypsin - Sus scrofa (Pig).; P07477 SWISS-PROT:P07477 Tax_Id=9606 Gene_Symbol=PRSS1 Trypsin-1 precursor	P00761 SWISS-PROT:P00761|TRYP_PIG Trypsin - Sus scrofa (Pig). (Doubtful); P07477 SWISS-PROT:P07477 Tax_Id=9606 Gene_Symbol=PRSS1 Trypsin-1 precursor (Doubtful)	2	0	NKPGVYTK	NH2-NKPGVYTK-COOH	209; 224	QK; QK	VC; VY				3	3	100	Confident
185	GEPV01033026.1|:385-1125(-)	GEPV01033026.1|:385-1125(-) (Doubtful)	1	1	SDQFQLGGLGNFLSDHSDSDK	NH2-SDQFQLGGLGNFLSDHSDSDK-COOH	207	AR	MF				8	8	100	Confident
186	GEPV01042675.1|:2-5101(-)	GEPV01042675.1|:2-5101(-) (Doubtful)	1	1	VPLGGYTNPESSK	NH2-VPLGGYTNPESSK-COOH	193	QR	TT				15	15	100	Confident
187	GEPV01042675.1|:2-5101(-)	GEPV01042675.1|:2-5101(-) (Doubtful)	1	1	QFPLQYVYHYR	pyro-QFPLQYVYHYR-COOH	17	GL	AK	Pyrolidone from Q (1)			3	3	100	Confident
188	GEPV01029219.1|:661-1533(-)	GEPV01029219.1|:661-1533(-) (Doubtful)	1	1	AFFNVINWDNVAER	NH2-AFFNVINWDNVAER-COOH	267	VK	YA				3	5	100	Confident
189	GEPV01029219.1|:661-1533(-)	GEPV01029219.1|:661-1533(-) (Doubtful)	1	1	YVAGITVEQAGK	NH2-YVAGITVEQAGK-COOH	47	AK	AL				3	3	100	Confident
190	GEPV01038994.1|:103-2094(-)	GEPV01038994.1|:103-2094(-) (Doubtful)	1	1	LSNHLQVVDELYWDRPIYEGFAPH	NH2-LSNHLQVVDELYWDRPIYEGFAPH-COOH	250	ER	TT				1	1	100	Confident
191	GEPV01037052.1|:1-5142(+)	GEPV01037052.1|:1-5142(+) (Not Validated)	0	1	LIMRFDDTNPAKEDAHFESVILEDLK	NH2-LIMRFDDTNPAKEDAHFESVILEDLK-COOH	180	GK	LL				0	8	54.5455	Doubtful
192	P00761 SWISS-PROT:P00761|TRYP_PIG Trypsin - Sus scrofa (Pig).	P00761 SWISS-PROT:P00761|TRYP_PIG Trypsin - Sus scrofa (Pig). (Doubtful)	1	1	YVNWIQQTIAAN	NH2-YVNWIQQTIAAN-COOH	220	CN					2	2	100	Confident
193	GEPV01043235.1|:2912-9880(-)	GEPV01043235.1|:2912-9880(-) (Doubtful)	1	1	GDNFFNLNLSPGGR	NH2-GDNFFNLNLSPGGR-COOH	544	KR	SH				3	3	100	Confident
194	P00761 SWISS-PROT:P00761|TRYP_PIG Trypsin - Sus scrofa (Pig).	P00761 SWISS-PROT:P00761|TRYP_PIG Trypsin - Sus scrofa (Pig). (Doubtful)	1	1	IITHPNFNGNTLDNDIMLIK	NH2-IITHPNFNGNTLDNDIM<ox>LIK-COOH	78	AK	LS	Oxidation of M (17)		Oxidation of M (17: Very Confident)	59	60	100	Confident
195	GEPV01054001.1|:212-940(+)	GEPV01054001.1|:212-940(+) (Doubtful)	1	1	VLKEESDR	NH2-VLKEESDR-COOH	77	AK	HW				3	3	100	Confident
196	GEPV01042675.1|:2-5101(-)	GEPV01042675.1|:2-5101(-) (Doubtful)	1	1	VPLGGYTNPESSKTTK	NH2-VPLGGYTNPESSKTTK-COOH	193	QR	TT				6	6	100	Confident
197	GEPV01018526.1|:90-668(+)	GEPV01018526.1|:90-668(+) (Doubtful)	1	1	TFISSTFK	NH2-TFISSTFK-COOH	104	FK	TI				3	3	100	Confident
198	GEPV01038994.1|:103-2094(-)	GEPV01038994.1|:103-2094(-) (Doubtful)	1	1	LNHEDFSFNIGVK	NH2-LNHEDFSFNIGVK-COOH	469	SR	AN				6	6	100	Confident
199	GEPV01029219.1|:661-1533(-)	GEPV01029219.1|:661-1533(-) (Doubtful)	1	1	HHQGYINNLK	NH2-HHQGYINNLK-COOH	115	TK	AA				6	6	100	Confident
200	GEPV01054001.1|:212-940(+)	GEPV01054001.1|:212-940(+) (Doubtful)	1	1	TTVVQVNDLHR	NH2-TTVVQVNDLHR-COOH	171	CK	MS				6	6	100	Confident
201	GEPV01042675.1|:2-5101(-)	GEPV01042675.1|:2-5101(-) (Doubtful)	1	1	ELFGDHHVTR	pyro-ELFGDHHVTR-COOH	179	QR	DV	Pyrolidone from E (1)			15	17	100	Confident
202	GEPV01016592.1|:89-1033(+)	GEPV01016592.1|:89-1033(+) (Doubtful)	1	1	ADGLGGLYR	NH2-ADGLGGLYR-COOH	175	YK	GF				3	3	100	Confident
203	GEPV01007839.1|:1-441(-); GEPV01015871.1|:144-884(+)	GEPV01015871.1|:144-884(+) (Doubtful)	1	1	YDDMAAAMK	NH2-YDDMAAAMK-COOH	4; 20	ER; ER	KV; QV				3	3	100	Confident
204	GEPV01033026.1|:385-1125(-)	GEPV01033026.1|:385-1125(-) (Doubtful)	1	1	TYFTEDTVR	NH2-TYFTEDTVR-COOH	93	AQ	YL				3	3	100	Confident
205	GEPV01029219.1|:661-1533(-)	GEPV01029219.1|:661-1533(-) (Doubtful)	1	1	DQFSAASVAVK	NH2-DQFSAASVAVK-COOH	197	FK	GS				3	3	100	Confident
206	P02768-1 SWISS-PROT:P02768-1 Tax_Id=9606 Gene_Symbol=ALB Isoform 1 of Serum albumin precursor	P02768-1 SWISS-PROT:P02768-1 Tax_Id=9606 Gene_Symbol=ALB Isoform 1 of Serum albumin precursor (Doubtful)	1	1	FKDLGEENFK	NH2-FKDLGEENFK-COOH	35	HR	AL				3	3	100	Confident
207	GEPV01033026.1|:385-1125(-)	GEPV01033026.1|:385-1125(-) (Doubtful)	1	1	SDQFQLGGLGNFLSD	NH2-SDQFQLGGLGNFLSD-COOH	207	AR	HS				3	3	100	Confident
208	GEPV01015871.1|:144-884(+)	GEPV01015871.1|:144-884(+) (Doubtful)	1	1	EKVETELR	NH2-EKVETELR-COOH	85	YR	EI				3	4	100	Confident
209	GEPV01015871.1|:144-884(+)	GEPV01015871.1|:144-884(+) (Doubtful)	1	1	AGVVEDSQK	NH2-AGVVEDSQK-COOH	140	AR	SY				4	4	100	Confident
210	GEPV01033026.1|:385-1125(-)	GEPV01033026.1|:385-1125(-) (Doubtful)	1	1	SDQFQLGGLGNF	NH2-SDQFQLGGLGNF-COOH	207	AR	LS				3	3	100	Confident
211	GEPV01033624.1|:1089-1775(-)	GEPV01033624.1|:1089-1775(-) (Doubtful)	1	1	TKELDPEER	NH2-TKELDPEER-COOH	123	EK	GH				1	1	100	Confident
212	GEPV01054001.1|:212-940(+)	GEPV01054001.1|:212-940(+) (Doubtful)	1	1	KFSNLYTSLEK	NH2-KFSNLYTSLEK-COOH	215	MR	MS				5	5	100	Confident
213	GEPV01043235.1|:2912-9880(-)	GEPV01043235.1|:2912-9880(-) (Doubtful)	1	1	DSSSGAISASFNSLSVVVK	NH2-DSSSGAISASFNSLSVVVK-COOH	498	MN	SP				3	3	100	Confident
214	GEPV01033026.1|:385-1125(-)	GEPV01033026.1|:385-1125(-) (Doubtful)	1	1	QMGYMDEFDNVNYDALVAEVDTI	pyro-QMGYMDEFDNVNYDALVAEVDTI-COOH	120	IK	PG	Pyrolidone from Q (1)			1	1	100	Doubtful
215	GEPV01016592.1|:89-1033(+)	GEPV01016592.1|:89-1033(+) (Doubtful)	1	1	TAVAPIER	NH2-TAVAPIER-COOH	26	SK	VK				2	2	100	Confident
216	P02768-1 SWISS-PROT:P02768-1 Tax_Id=9606 Gene_Symbol=ALB Isoform 1 of Serum albumin precursor	P02768-1 SWISS-PROT:P02768-1 Tax_Id=9606 Gene_Symbol=ALB Isoform 1 of Serum albumin precursor (Doubtful)	1	1	LVNEVTEFAK	NH2-LVNEVTEFAK-COOH	66	VK	TC				3	3	100	Confident
217	GEPV01023813.1|:136-654(-)	GEPV01023813.1|:136-654(-) (Doubtful)	1	1	TREEFLSLLR	NH2-TREEFLSLLR-COOH	163	QR					3	3	100	Confident
218	GEPV01036178.1|:2-1225(+)	GEPV01036178.1|:2-1225(+) (Doubtful)	1	1	YALHWLGDNSATWEDMR	NH2-YALHWLGDNSATWEDM<ox>R-COOH	270	GR	QS	Oxidation of M (16)		Oxidation of M (16: Very Confident)	13	37	100	Confident
219	GEPV01021055.1|:83-736(+)	GEPV01021055.1|:83-736(+) (Doubtful)	1	1	FPTMVTHQDK	NH2-FPTMVTHQDK-COOH	134	GK	LT				2	2	100	Confident
220	GEPV01014151.1|:1-360(+)	GEPV01014151.1|:1-360(+) (Doubtful)	1	1	GGVGGAAASETESEAGEMWNTHLEELGDK	NH2-GGVGGAAASETESEAGEMWNTHLEELGDK-COOH	79	SR	LN				1	3	100	Doubtful
221	GEPV01038994.1|:103-2094(-)	GEPV01038994.1|:103-2094(-) (Doubtful)	1	1	TPFATLIK	NH2-TPFATLIK-COOH	546	DR	EA				1	3	27.2727	Doubtful
222	GEPV01038994.1|:103-2094(-)	GEPV01038994.1|:103-2094(-) (Doubtful)	1	1	QQAINQLLLK	pyro-QQAINQLLLK-COOH	26	VK	VT	Pyrolidone from Q (1)			3	3	100	Confident
223	GEPV01059273.1|:121-921(+)	GEPV01059273.1|:121-921(+) (Doubtful)	1	1	DHHAGGFDIVR	NH2-DHHAGGFDIVR-COOH	199	AR	IK				6	6	100	Confident
224	GEPV01016592.1|:89-1033(+)	GEPV01016592.1|:89-1033(+) (Doubtful)	1	1	GAFSNVLR	NH2-GAFSNVLR-COOH	278	FK	GT				3	3	100	Confident
225	GEPV01054001.1|:212-940(+)	GEPV01054001.1|:212-940(+) (Doubtful)	1	1	TGGNHGDFDADMAHYLEEK	NH2-TGGNHGDFDADM<ox>AHYLEEK-COOH	187	KR	IE	Oxidation of M (12)		Oxidation of M (12: Very Confident)	3	3	100	Confident
226	GEPV01031197.1|:403-1020(-)	GEPV01031197.1|:403-1020(-) (Doubtful)	1	1	RIQLLEEDLER	NH2-RIQLLEEDLER-COOH	12	NR	SE				2	2	100	Confident
227	GEPV01043203.1|:1993-3006(-); GEPV01043204.1|:1912-2925(-)	GEPV01043203.1|:1993-3006(-), GEPV01043204.1|:1912-2925(-) (Doubtful)	1	1	WGDEGYIFMAR	NH2-WGDEGYIFMAR-COOH	310; 310	EK; EK	NK; NK				3	3	100	Confident
228	GEPV01033624.1|:1089-1775(-)	GEPV01033624.1|:1089-1775(-) (Doubtful)	1	1	FPINHGPTSEENFLIDGASVLR	NH2-FPINHGPTSEENFLIDGASVLR-COOH	186	KK	DF				3	3	100	Confident
229	GEPV01033026.1|:385-1125(-)	GEPV01033026.1|:385-1125(-) (Doubtful)	1	1	TIPGAEPQLK	NH2-TIPGAEPQLK-COOH	141	VD	TD				4	4	100	Confident
230	GEPV01043235.1|:2912-9880(-)	GEPV01043235.1|:2912-9880(-) (Doubtful)	1	1	GNLSIQSR	NH2-GNLSIQSR-COOH	686	FK	FP				4	4	100	Confident
231	GEPV01059273.1|:121-921(+)	GEPV01059273.1|:121-921(+) (Doubtful)	1	1	ITEDEANYK	NH2-ITEDEANYK-COOH	114	HR	LC				2	2	100	Confident
232	GEPV01033026.1|:385-1125(-)	GEPV01033026.1|:385-1125(-) (Doubtful)	1	1	NVLDEGSDFLW	NH2-NVLDEGSDFLW-COOH	236	AR					23	27	100	Confident
233	GEPV01021055.1|:83-736(+)	GEPV01021055.1|:83-736(+) (Doubtful)	1	1	LVGPGLNK	NH2-LVGPGLNK-COOH	123	PR	AG				3	3	100	Confident
234	GEPV01033026.1|:385-1125(-)	GEPV01033026.1|:385-1125(-) (Doubtful)	1	1	NVNYDALVAEVDTIPGAEPQLK	NH2-NVNYDALVAEVDTIPGAEPQLK-COOH	129	FD	TD				6	6	100	Confident
235	GEPV01018526.1|:90-668(+)	GEPV01018526.1|:90-668(+) (Doubtful)	1	1	DGQVTVDEFK	NH2-DGQVTVDEFK-COOH	74	NK	QA				3	3	100	Confident
236	GEPV01043235.1|:2912-9880(-)	GEPV01043235.1|:2912-9880(-) (Doubtful)	1	1	GSLISGDGTEPQEIADIELQMLGK	NH2-GSLISGDGTEPQEIADIELQMLGK-COOH	1363	NK	RI				1	1	100	Confident
237	GEPV01056980.1|:32-754(-)	GEPV01056980.1|:32-754(-) (Doubtful)	1	1	YPLTTEAAMK	NH2-YPLTTEAAMK-COOH	163	IR	KI				3	3	100	Confident
238	GEPV01037388.1|:90-1652(+); GEPV01037389.1|:3-1073(+)	GEPV01037388.1|:90-1652(+), GEPV01037389.1|:3-1073(+) (Doubtful)	1	1	IILSYTQAYGK	NH2-IILSYTQAYGK-COOH	263; 99	QR; QR	DL; DL				2	2	100	Confident
239	GEPV01033441.1|:40-798(-); GEPV01033442.1|:40-822(-)	GEPV01033442.1|:40-822(-) (Doubtful)	1	1	DFLANDRER	NH2-DFLANDRER-COOH	224; 232	RL; RL	VM; VM				2	2	100	Confident
240	P00761 SWISS-PROT:P00761|TRYP_PIG Trypsin - Sus scrofa (Pig).	P00761 SWISS-PROT:P00761|TRYP_PIG Trypsin - Sus scrofa (Pig). (Doubtful)	1	1	IITHPNFN	NH2-IITHPNFN-COOH	78	AK	GN				1	2	100	Confident
241	GEPV01033441.1|:40-798(-); GEPV01033442.1|:40-822(-)	GEPV01033442.1|:40-822(-) (Doubtful)	1	1	DAYPLPADVVTTQHY	NH2-DAYPLPADVVTTQHY-COOH	176; 184	NK; NK	LF; LF				3	3	100	Confident
242	GEPV01044254.1|:2509-3285(-)	GEPV01044254.1|:2509-3285(-) (Doubtful)	1	1	LTDGTQLFVVDGLLFSHQEDVK	NH2-LTDGTQLFVVDGLLFSHQEDVK-COOH	200	QR	KA				2	2	100	Confident
243	GEPV01033026.1|:385-1125(-)	GEPV01033026.1|:385-1125(-) (Doubtful)	1	1	AKVDEPNSQADFG	NH2-AKVDEPNSQADFG-COOH	70	SR	AS				3	3	100	Confident
244	GEPV01043203.1|:1993-3006(-); GEPV01043204.1|:1912-2925(-)	GEPV01043203.1|:1993-3006(-), GEPV01043204.1|:1912-2925(-) (Doubtful)	1	1	SDIGADDTGFVDVK	NH2-SDIGADDTGFVDVK-COOH	222; 222	SK; SK	SG; SG				3	3	100	Confident
245	GEPV01029543.1|:600-1619(-)	GEPV01029543.1|:600-1619(-) (Doubtful)	1	1	MGLTEYQAVK	NH2-MGLTEYQAVK-COOH	314	RR	EM				1	1	100	Confident
246	GEPV01033026.1|:385-1125(-)	GEPV01033026.1|:385-1125(-) (Doubtful)	1	1	MFALVWAR	NH2-MFALVWAR-COOH	228	DK	NV				27	27	100	Confident
247	P02768-1 SWISS-PROT:P02768-1 Tax_Id=9606 Gene_Symbol=ALB Isoform 1 of Serum albumin precursor; P02769 SWISS-PROT:P02769 (Bos taurus) Bovine serum albumin precursor	P02768-1 SWISS-PROT:P02768-1 Tax_Id=9606 Gene_Symbol=ALB Isoform 1 of Serum albumin precursor (Doubtful); P02769 SWISS-PROT:P02769 (Bos taurus) Bovine serum albumin precursor (Not Validated)	1	0	FQNALLVR	NH2-FQNALLVR-COOH	427; 426	YK; YG	YT; YT				3	3	100	Confident
248	GEPV01040958.1|:520-1881(-)	GEPV01040958.1|:520-1881(-) (Doubtful)	1	1	VLSEVDAR	NH2-VLSEVDAR-COOH	432	NR	TL				2	2	100	Confident
249	GEPV01038994.1|:103-2094(-)	GEPV01038994.1|:103-2094(-) (Doubtful)	1	1	DTETIDDVPITTHVSR	NH2-DTETIDDVPITTHVSR-COOH	453	ID	LN				6	6	100	Confident
250	GEPV01029746.1|:1-813(-)	GEPV01029746.1|:1-813(-) (Doubtful)	1	1	AVEALVHELQDGR	NH2-AVEALVHELQDGR-COOH	99	GK	LL				3	3	100	Confident
251	GEPV01016592.1|:89-1033(+)	GEPV01016592.1|:89-1033(+) (Doubtful)	1	1	EQGFLAFWR	NH2-EQGFLAFWR-COOH	66	PK	GN				3	3	100	Confident
252	P02768-1 SWISS-PROT:P02768-1 Tax_Id=9606 Gene_Symbol=ALB Isoform 1 of Serum albumin precursor	P02768-1 SWISS-PROT:P02768-1 Tax_Id=9606 Gene_Symbol=ALB Isoform 1 of Serum albumin precursor (Doubtful)	1	1	AEFAEVSK	NH2-AEFAEVSK-COOH	250	PK	LV				2	2	100	Confident
253	P02768-1 SWISS-PROT:P02768-1 Tax_Id=9606 Gene_Symbol=ALB Isoform 1 of Serum albumin precursor	P02768-1 SWISS-PROT:P02768-1 Tax_Id=9606 Gene_Symbol=ALB Isoform 1 of Serum albumin precursor (Doubtful)	1	1	QTALVELVK	NH2-QTALVELVK-COOH	550	KK	HK				3	3	100	Confident
254	GEPV01042675.1|:2-5101(-)	GEPV01042675.1|:2-5101(-) (Doubtful)	1	1	VSSGIPDINK	NH2-VSSGIPDINK-COOH	30	AK	RH				8	8	100	Confident
255	GEPV01043235.1|:2912-9880(-)	GEPV01043235.1|:2912-9880(-) (Doubtful)	1	1	SEIDSSLTTLPGLIIGIGR	NH2-SEIDSSLTTLPGLIIGIGR-COOH	1460	LR	EG				3	3	100	Confident
256	GEPV01044415.1|:336-1211(+)	GEPV01044415.1|:336-1211(+) (Doubtful)	1	1	TSLTTGYNWNSVSEITK	NH2-TSLTTGYNWNSVSEITK-COOH	197	LR	ES				3	3	100	Confident
257	GEPV01042675.1|:2-5101(-)	GEPV01042675.1|:2-5101(-) (Doubtful)	1	1	AKVSSGIPDINK	NH2-AKVSSGIPDINK-COOH	28	YR	RH				2	2	100	Confident
258	GEPV01042675.1|:2-5101(-)	GEPV01042675.1|:2-5101(-) (Doubtful)	1	1	VSSGIPDINKR	NH2-VSSGIPDINKR-COOH	30	AK	HS				18	19	100	Confident
259	GEPV01031197.1|:403-1020(-)	GEPV01031197.1|:403-1020(-) (Doubtful)	1	1	LAEASQAADESER	NH2-LAEASQAADESER-COOH	34	TK	MR				3	3	100	Confident
260	GEPV01033026.1|:385-1125(-)	GEPV01033026.1|:385-1125(-) (Doubtful)	1	1	AQTYFTEDTVR	NH2-AQTYFTEDTVR-COOH	91	KG	YL				2	2	100	Confident
261	GEPV01037388.1|:90-1652(+); GEPV01037389.1|:3-1073(+)	GEPV01037388.1|:90-1652(+), GEPV01037389.1|:3-1073(+) (Doubtful)	1	1	FLANFDSSTDAALLR	NH2-FLANFDSSTDAALLR-COOH	221; 57	IR; IR	KA; KA				3	3	100	Confident
262	GEPV01033026.1|:385-1125(-)	GEPV01033026.1|:385-1125(-) (Doubtful)	1	1	QMGYMDEFDNVNYDALVAEVDTI	pyro-QM<ox>GYMDEFDNVNYDALVAEVDTI-COOH	120	IK	PG	Oxidation of M (2), Pyrolidone from Q (1)		Oxidation of M (2: Very Confident), Pyrolidone from Q (1: Very Confident)	1	1	100	Doubtful
263	GEPV01029219.1|:661-1533(-)	GEPV01029219.1|:661-1533(-) (Doubtful)	1	1	AELGEEKGEHVLPPLK	NH2-AELGEEKGEHVLPPLK-COOH	78	IK	YD				5	5	100	Confident
264	GEPV01043235.1|:2912-9880(-)	GEPV01043235.1|:2912-9880(-) (Doubtful)	1	1	LELTFPGSK	NH2-LELTFPGSK-COOH	822	IK	LY				3	3	100	Confident
265	GEPV01044884.1|:1-735(+)	GEPV01044884.1|:1-735(+) (Doubtful)	1	1	SNAADQHAVVR	NH2-SNAADQHAVVR-COOH	157	IK	VF				3	3	100	Confident
266	GEPV01038994.1|:103-2094(-)	GEPV01038994.1|:103-2094(-) (Doubtful)	1	1	AMGYPIDR	NH2-AMGYPIDR-COOH	632	KR	HV				3	3	100	Confident
267	GEPV01042675.1|:2-5101(-)	GEPV01042675.1|:2-5101(-) (Doubtful)	1	1	FGDHHVTR	NH2-FGDHHVTR-COOH	181	EL	DV				7	7	100	Confident
268	GEPV01033026.1|:385-1125(-)	GEPV01033026.1|:385-1125(-) (Doubtful)	1	1	QLYALYNR	NH2-QLYALYNR-COOH	29	ND	QK				3	3	63.6364	Confident
269	GEPV01042675.1|:2-5101(-)	GEPV01042675.1|:2-5101(-) (Doubtful)	1	1	LQFPLQYVYHYRAKVSSGIPDINK	NH2-LQFPLQYVYHYRAKVSSGIPDINK-COOH	16	SG	RH				2	2	100	Confident
270	GEPV01043235.1|:2912-9880(-)	GEPV01043235.1|:2912-9880(-) (Doubtful)	1	1	TDGQGFLIEYK	NH2-TDGQGFLIEYK-COOH	532	EK	RG				3	3	100	Confident
271	P02768-1 SWISS-PROT:P02768-1 Tax_Id=9606 Gene_Symbol=ALB Isoform 1 of Serum albumin precursor	P02768-1 SWISS-PROT:P02768-1 Tax_Id=9606 Gene_Symbol=ALB Isoform 1 of Serum albumin precursor (Doubtful)	1	1	DVFLGMFLYEYAR	NH2-DVFLGMFLYEYAR-COOH	348	AK	RH				2	2	100	Confident
272	GEPV01016592.1|:89-1033(+)	GEPV01016592.1|:89-1033(+) (Doubtful)	1	1	NEGTAAFFK	NH2-NEGTAAFFK-COOH	269	AK	GA				3	3	100	Confident
273	GEPV01031197.1|:403-1020(-)	GEPV01031197.1|:403-1020(-) (Doubtful)	1	1	FLAEEADR	NH2-FLAEEADR-COOH	74	AR	KY				3	3	100	Confident
274	GEPV01043235.1|:2912-9880(-)	GEPV01043235.1|:2912-9880(-) (Doubtful)	1	1	LDYNVSLGK	NH2-LDYNVSLGK-COOH	702	FK	DE				2	2	100	Confident
275	GEPV01033026.1|:385-1125(-)	GEPV01033026.1|:385-1125(-) (Doubtful)	1	1	AKVDEPNSQADFGASIS	NH2-AKVDEPNSQADFGASIS-COOH	70	SR	SG				2	2	100	Confident
276	GEPV01018966.1|:158-922(+)	GEPV01018966.1|:158-922(+) (Doubtful)	1	1	DGVVLAVEK	NH2-DGVVLAVEK-COOH	44	CK	IV				1	1	100	Confident
277	GEPV01029219.1|:661-1533(-)	GEPV01029219.1|:661-1533(-) (Doubtful)	1	1	KNQLANAASEAASIQQMAK	NH2-KNQLANAASEAASIQQMAK-COOH	28	IR	YV				3	3	100	Confident
278	GEPV01018526.1|:90-668(+)	GEPV01018526.1|:90-668(+) (Doubtful)	1	1	ADGISLTR	NH2-ADGISLTR-COOH	157	KK	YQ				3	3	100	Confident
279	GEPV01042675.1|:2-5101(-)	GEPV01042675.1|:2-5101(-) (Doubtful)	1	1	PLGGYTNPESSK	NH2-PLGGYTNPESSK-COOH	194	RV	TT				3	3	100	Confident
280	GEPV01033026.1|:385-1125(-)	GEPV01033026.1|:385-1125(-) (Doubtful)	1	1	KGAQTYFTEDTVR	NH2-KGAQTYFTEDTVR-COOH	89	SG	YL				3	3	100	Confident
281	GEPV01043235.1|:2912-9880(-)	GEPV01043235.1|:2912-9880(-) (Doubtful)	1	1	TLSLDASWNNNK	NH2-TLSLDASWNNNK-COOH	1304	VR	GE				1	1	100	Confident
282	GEPV01044884.1|:1-735(+)	GEPV01044884.1|:1-735(+) (Doubtful)	1	1	DFAFTFDIK	NH2-DFAFTFDIK-COOH	148	HK	SN				3	3	100	Confident
283	GEPV01015871.1|:144-884(+)	GEPV01015871.1|:144-884(+) (Doubtful)	1	1	QVTETGVELSNEER	NH2-QVTETGVELSNEER-COOH	29	MK	NL				3	3	100	Confident
284	GEPV01043235.1|:2912-9880(-)	GEPV01043235.1|:2912-9880(-) (Doubtful)	1	1	RGDNFFNLNLSPGGR	NH2-RGDNFFNLNLSPGGR-COOH	543	YK	SH				6	6	100	Confident
285	GEPV01054001.1|:212-940(+)	GEPV01054001.1|:212-940(+) (Doubtful)	1	1	MSNLGLAQHIFDK	NH2-MSNLGLAQHIFDK-COOH	226	EK	SL				6	6	100	Confident
286	GEPV01033026.1|:385-1125(-)	GEPV01033026.1|:385-1125(-) (Doubtful)	1	1	VAEVDTIPGAEPQLK	NH2-VAEVDTIPGAEPQLK-COOH	136	AL	TD				3	3	100	Confident
287	GEPV01032657.1|:2-787(-)	GEPV01032657.1|:2-787(-) (Doubtful)	1	1	LVQADSAVK	NH2-LVQADSAVK-COOH	58	QR	FV				3	3	100	Confident
288	GEPV01033441.1|:40-798(-); GEPV01033442.1|:40-822(-)	GEPV01033442.1|:40-822(-) (Doubtful)	1	1	SNVVSDIAK	NH2-SNVVSDIAK-COOH	102; 110	YP; YP	DI; DI				3	3	100	Confident
289	GEPV01042675.1|:2-5101(-)	GEPV01042675.1|:2-5101(-) (Doubtful)	1	1	SIVSLFNIPPLK	NH2-SIVSLFNIPPLK-COOH	123	YK	EA				18	24	100	Confident
290	GEPV01042407.1|:155-985(+); GEPV01042413.1|:151-981(+)	GEPV01042407.1|:155-985(+), GEPV01042413.1|:151-981(+) (Doubtful)	1	1	VLDEAQESGNPELELQEK	NH2-VLDEAQESGNPELELQEK-COOH	8; 8	KK; KK	QI; QI				2	2	100	Confident
291	GEPV01037388.1|:90-1652(+); GEPV01037389.1|:3-1073(+)	GEPV01037388.1|:90-1652(+), GEPV01037389.1|:3-1073(+) (Doubtful)	1	1	AEIDLGNIK	NH2-AEIDLGNIK-COOH	486; 322	TR; TR	QE; QE				2	2	100	Confident
292	P02768-1 SWISS-PROT:P02768-1 Tax_Id=9606 Gene_Symbol=ALB Isoform 1 of Serum albumin precursor	P02768-1 SWISS-PROT:P02768-1 Tax_Id=9606 Gene_Symbol=ALB Isoform 1 of Serum albumin precursor (Doubtful)	1	1	KQTALVELVK	NH2-KQTALVELVK-COOH	549	IK	HK				3	3	100	Confident
293	GEPV01042675.1|:2-5101(-)	GEPV01042675.1|:2-5101(-) (Doubtful)	1	1	ELFGDHHVTR	NH2-ELFGDHHVTR-COOH	179	QR	DV				42	42	100	Confident
294	GEPV01032657.1|:2-787(-)	GEPV01032657.1|:2-787(-) (Doubtful)	1	1	QGTLLSAGQSIAK	pyro-QGTLLSAGQSIAK-COOH	239	HR	LL	Pyrolidone from Q (1)			2	2	100	Confident
295	P02768-1 SWISS-PROT:P02768-1 Tax_Id=9606 Gene_Symbol=ALB Isoform 1 of Serum albumin precursor	P02768-1 SWISS-PROT:P02768-1 Tax_Id=9606 Gene_Symbol=ALB Isoform 1 of Serum albumin precursor (Doubtful)	1	1	LDELRDEGK	NH2-LDELRDEGK-COOH	206	PK	AS				2	2	100	Confident
296	GEPV01029219.1|:661-1533(-)	GEPV01029219.1|:661-1533(-) (Doubtful)	1	1	YDYTGLEPSISGMIMEIHHTK	NH2-YDYTGLEPSISGM<ox>IM<ox>EIHHTK-COOH	94	LK	HH	Oxidation of M (13, 15)		Oxidation of M (13: Very Confident, 15: Very Confident)	1	1	100	Confident
297	GEPV01033441.1|:40-798(-); GEPV01033442.1|:40-822(-)	GEPV01033442.1|:40-822(-) (Doubtful)	1	1	VMALLMANTIVGPDDFGLYE	NH2-VM<ox>ALLM<ox>ANTIVGPDDFGLYE-COOH	233; 241	ER; ER		Oxidation of M (2, 6)		Oxidation of M (2: Very Confident, 6: Very Confident)	3	3	100	Confident
298	GEPV01032657.1|:2-787(-)	GEPV01032657.1|:2-787(-) (Doubtful)	1	1	EETGDPALR	NH2-EETGDPALR-COOH	222	AR	AS				2	2	100	Confident
299	P00761 SWISS-PROT:P00761|TRYP_PIG Trypsin - Sus scrofa (Pig).	P00761 SWISS-PROT:P00761|TRYP_PIG Trypsin - Sus scrofa (Pig). (Doubtful)	1	1	IITHPNFNGNTLDNDIMLIK	NH2-IITHPNFNGNTLDNDIMLIK-COOH	78	AK	LS				38	38	100	Confident
300	GEPV01029543.1|:600-1619(-)	GEPV01029543.1|:600-1619(-) (Doubtful)	1	1	LIDDHFLFK	NH2-LIDDHFLFK-COOH	164	QK	EG				1	1	100	Confident
301	GEPV01054001.1|:212-940(+)	GEPV01054001.1|:212-940(+) (Doubtful)	1	1	FSNLYTSLEK	NH2-FSNLYTSLEK-COOH	216	RK	MS				3	3	100	Confident
302	GEPV01029543.1|:600-1619(-)	GEPV01029543.1|:600-1619(-) (Doubtful)	1	1	VSSTLSSLEGIHK	NH2-VSSTLSSLEGIHK-COOH	135	EK	GT				5	5	100	Confident
303	GEPV01043235.1|:2912-9880(-)	GEPV01043235.1|:2912-9880(-) (Doubtful)	1	1	SDSTSFEVNFTPNTNEPVK	NH2-SDSTSFEVNFTPNTNEPVK-COOH	1337	VK	IA				3	3	100	Confident
304	GEPV01043235.1|:2912-9880(-)	GEPV01043235.1|:2912-9880(-) (Doubtful)	1	1	IGDYNLSITTPQR	NH2-IGDYNLSITTPQR-COOH	847	LK	RA				3	3	100	Confident
305	GEPV01033026.1|:385-1125(-)	GEPV01033026.1|:385-1125(-) (Doubtful)	1	1	SQADFGASISSGK	NH2-SQADFGASISSGK-COOH	77	PN	GA				4	4	100	Confident
306	GEPV01042675.1|:2-5101(-)	GEPV01042675.1|:2-5101(-) (Doubtful)	1	1	GQQVAGYIYR	NH2-GQQVAGYIYR-COOH	1594	AR	RN				1	1	100	Confident
307	GEPV01034416.1|:220-2544(+)	GEPV01034416.1|:220-2544(+) (Doubtful)	1	1	DAGDDPSDTTTNLVEEEGGQTQNAR	NH2-DAGDDPSDTTTNLVEEEGGQTQNAR-COOH	587	RR	QQ				5	5	100	Confident
308	GEPV01033026.1|:385-1125(-)	GEPV01033026.1|:385-1125(-) (Doubtful)	1	1	ALVAEVDTIPGAEPQLK	NH2-ALVAEVDTIPGAEPQLK-COOH	134	YD	TD				3	3	100	Confident
309	GEPV01021055.1|:83-736(+)	GEPV01021055.1|:83-736(+) (Doubtful)	1	1	RYDAFLASESLIK	NH2-RYDAFLASESLIK-COOH	106	AK	QI				1	1	100	Confident
310	P00761 SWISS-PROT:P00761|TRYP_PIG Trypsin - Sus scrofa (Pig).	P00761 SWISS-PROT:P00761|TRYP_PIG Trypsin - Sus scrofa (Pig). (Doubtful)	1	1	LGEHNIDVLEGNEQFINAAK	NH2-LGEHNIDVLEGNEQFINAAK-COOH	58	VR	II				37	44	100	Confident
311	GEPV01042675.1|:2-5101(-)	GEPV01042675.1|:2-5101(-) (Doubtful)	1	1	PLQYVYHYR	NH2-PLQYVYHYR-COOH	19	QF	AK				2	2	100	Confident
312	GEPV01033005.1|:2-391(-)	GEPV01033005.1|:2-391(-) (Doubtful)	1	1	VMLDETLESTSR	NH2-VMLDETLESTSR-COOH	111	CK	TR				3	3	100	Confident
313	P00761 SWISS-PROT:P00761|TRYP_PIG Trypsin - Sus scrofa (Pig).	P00761 SWISS-PROT:P00761|TRYP_PIG Trypsin - Sus scrofa (Pig). (Doubtful)	1	1	LGEHNIDVLEGNEQFIN	NH2-LGEHNIDVLEGNEQFIN-COOH	58	VR	AA				7	7	100	Confident
314	GEPV01042675.1|:2-5101(-)	GEPV01042675.1|:2-5101(-) (Doubtful)	1	1	GQSVVTQQASQLGQFPFALENGLLTF	NH2-GQSVVTQQASQLGQFPFALENGLLTF-COOH	84	GK	NA				1	1	100	Doubtful
315	GEPV01042675.1|:2-5101(-)	GEPV01042675.1|:2-5101(-) (Doubtful)	1	1	SIVSLFNIPPLKEAFHK	NH2-SIVSLFNIPPLKEAFHK-COOH	123	YK	TS				2	4	100	Confident
316	GEPV01042675.1|:2-5101(-)	GEPV01042675.1|:2-5101(-) (Doubtful)	1	1	AEEEPWAINFYK	NH2-AEEEPWAINFYK-COOH	111	FN	SI				2	2	72.7273	Confident
317	GEPV01042675.1|:2-5101(-)	GEPV01042675.1|:2-5101(-) (Doubtful)	1	1	TTYTQHKLTGVAAAQR	NH2-TTYTQHKLTGVAAAQR-COOH	163	CR	EL				3	3	100	Confident
318	P00761 SWISS-PROT:P00761|TRYP_PIG Trypsin - Sus scrofa (Pig).	P00761 SWISS-PROT:P00761|TRYP_PIG Trypsin - Sus scrofa (Pig). (Doubtful)	1	1	LGEHNIDVLEGNEQ	NH2-LGEHNIDVLEGNEQ-COOH	58	VR	FI				3	3	100	Confident
319	GEPV01029219.1|:661-1533(-)	GEPV01029219.1|:661-1533(-) (Doubtful)	1	1	LNEAQANGDIAASNALVPALK	NH2-LNEAQANGDIAASNALVPALK-COOH	130	AK	FN				17	17	100	Confident
320	GEPV01007839.1|:1-441(-); GEPV01015871.1|:144-884(+); GEPV01016901.1|:3-428(-); GEPV01016902.1|:3-410(-); GEPV01017845.1|:483-1250(-); GEPV01017846.1|:332-1099(-); GEPV01020731.1|:1-345(+); GEPV01027583.1|:27-761(-); GEPV01043174.1|:5871-6692(-); GEPV01049655.1|:74-382(+)	GEPV01015871.1|:144-884(+) (Doubtful); GEPV01016901.1|:3-428(-), GEPV01016902.1|:3-410(-) (Not Validated); GEPV01027583.1|:27-761(-) (Not Validated)	1	0	NLLSVAYK	NH2-NLLSVAYK-COOH	27; 43; 42; 42; 44; 44; 43; 46; 43; 21	ER; ER; ER; ER; ER; ER; ER; ER; ER; ER	NV; NV; NT; NT; NL; NL; NT; NT; NV; NT				3	3	100	Confident
321	GEPV01031843.1|:198-2183(+)	GEPV01031843.1|:198-2183(+) (Not Validated)	0	1	MRFSSGGTNTAELR	NH2-MRFSSGGTNTAELR-COOH	496	DK	LT				3	3	99.2683	Confident
322	GEPV01043235.1|:2912-9880(-)	GEPV01043235.1|:2912-9880(-) (Doubtful)	1	1	MTIQGGGTLGR	NH2-MTIQGGGTLGR-COOH	599	AK	RE				3	3	100	Confident
323	P00761 SWISS-PROT:P00761|TRYP_PIG Trypsin - Sus scrofa (Pig).	P00761 SWISS-PROT:P00761|TRYP_PIG Trypsin - Sus scrofa (Pig). (Doubtful)	1	1	GNTLDNDIMLIK	NH2-GNTLDNDIMLIK-COOH	86	FN	LS				3	3	100	Confident
324	GEPV01033624.1|:1089-1775(-)	GEPV01033624.1|:1089-1775(-) (Doubtful)	1	1	LDTHFIALVNVGDR	NH2-LDTHFIALVNVGDR-COOH	163	HK	LY				6	9	100	Confident
325	GEPV01042675.1|:2-5101(-)	GEPV01042675.1|:2-5101(-) (Doubtful)	1	1	LGGYTNPESSK	NH2-LGGYTNPESSK-COOH	195	VP	TT				1	1	100	Confident
326	GEPV01015871.1|:144-884(+)	GEPV01015871.1|:144-884(+) (Doubtful)	1	1	SYQEAFDIAR	NH2-SYQEAFDIAR-COOH	149	QK	SE				5	5	100	Confident
327	GEPV01032657.1|:2-787(-)	GEPV01032657.1|:2-787(-) (Doubtful)	1	1	SLVVVTGASR	NH2-SLVVVTGASR-COOH	12	GR	GF				3	3	100	Confident
328	GEPV01015871.1|:144-884(+)	GEPV01015871.1|:144-884(+) (Doubtful)	1	1	QVTETGVELSNEER	pyro-QVTETGVELSNEER-COOH	29	MK	NL	Pyrolidone from Q (1)			3	3	100	Confident
329	GEPV01038994.1|:103-2094(-)	GEPV01038994.1|:103-2094(-) (Doubtful)	1	1	SSESSVTIPDR	NH2-SSESSVTIPDR-COOH	535	RK	TP				1	1	100	Confident
330	GEPV01029219.1|:661-1533(-)	GEPV01029219.1|:661-1533(-) (Doubtful)	1	1	DSYIAALEK	NH2-DSYIAALEK-COOH	5	EK	KL				3	3	100	Confident
331	GEPV01043235.1|:2912-9880(-)	GEPV01043235.1|:2912-9880(-) (Doubtful)	1	1	LDSEFSTQER	NH2-LDSEFSTQER-COOH	1421	IK	NG				3	3	100	Confident
332	GEPV01043203.1|:1993-3006(-); GEPV01043204.1|:1912-2925(-)	GEPV01043203.1|:1993-3006(-), GEPV01043204.1|:1912-2925(-) (Doubtful)	1	1	LPASIDWR	NH2-LPASIDWR-COOH	120; 120	VV; VV	EK; EK				3	3	100	Confident
333	GEPV01042675.1|:2-5101(-)	GEPV01042675.1|:2-5101(-) (Doubtful)	1	1	GLLTFNAEEEPWAINFYK	NH2-GLLTFNAEEEPWAINFYK-COOH	105	EN	SI				2	2	100	Confident
334	P02768-1 SWISS-PROT:P02768-1 Tax_Id=9606 Gene_Symbol=ALB Isoform 1 of Serum albumin precursor	P02768-1 SWISS-PROT:P02768-1 Tax_Id=9606 Gene_Symbol=ALB Isoform 1 of Serum albumin precursor (Doubtful)	1	1	RHPDYSVVLLLR	NH2-RHPDYSVVLLLR-COOH	361	AR	LA				6	6	100	Confident
335	GEPV01042675.1|:2-5101(-)	GEPV01042675.1|:2-5101(-) (Doubtful)	1	1	VPLGGYTNPESSKT	NH2-VPLGGYTNPESSKT-COOH	193	QR	TK				1	1	100	Confident
336	GEPV01056980.1|:32-754(-)	GEPV01056980.1|:32-754(-) (Doubtful)	1	1	LASDYDALDVANK	NH2-LASDYDALDVANK-COOH	224	VK	IG				3	4	100	Confident
337	P00761 SWISS-PROT:P00761|TRYP_PIG Trypsin - Sus scrofa (Pig).	P00761 SWISS-PROT:P00761|TRYP_PIG Trypsin - Sus scrofa (Pig). (Doubtful)	1	1	TLDNDIMLIK	NH2-TLDNDIM<ox>LIK-COOH	88	GN	LS	Oxidation of M (7)		Oxidation of M (7: Very Confident)	2	2	100	Confident
338	GEPV01037388.1|:90-1652(+); GEPV01037389.1|:3-1073(+)	GEPV01037388.1|:90-1652(+), GEPV01037389.1|:3-1073(+) (Doubtful)	1	1	GFGTDEASIINVLANR	NH2-GFGTDEASIINVLANR-COOH	240; 76	MK; MK	TS; TS				1	1	100	Confident
339	GEPV01033624.1|:1089-1775(-)	GEPV01033624.1|:1089-1775(-) (Doubtful)	1	1	WLPLESNPEVMNK	NH2-WLPLESNPEVMNK-COOH	4	VR	FL				3	3	100	Confident
340	GEPV01045753.1|:119-760(+)	GEPV01045753.1|:119-760(+) (Doubtful)	1	1	STEAMQANIQR	NH2-STEAMQANIQR-COOH	105	SK	LR				1	1	100	Confident
341	GEPV01034704.1|:1798-2604(-); GEPV01034705.1|:1916-2737(-); GEPV01034706.1|:72-899(-)	GEPV01034704.1|:1798-2604(-) (Doubtful)	1	1	TLNTETIAANAR	NH2-TLNTETIAANAR-COOH	161; 161; 161	VK; VK; VK	FF; FF; FF				3	3	100	Confident
342	GEPV01034704.1|:1798-2604(-); GEPV01034705.1|:1916-2737(-); GEPV01034706.1|:72-899(-)	GEPV01034704.1|:1798-2604(-) (Doubtful)	1	1	INDFHAGPDHYFVLGLPTGGTPLGTYK	NH2-INDFHAGPDHYFVLGLPTGGTPLGTYK-COOH	24; 24; 24	KR; KR; KR	KL; KL; KL				3	3	100	Confident
343	GEPV01029219.1|:661-1533(-)	GEPV01029219.1|:661-1533(-) (Doubtful)	1	1	LAELSGIEVDQIR	NH2-LAELSGIEVDQIR-COOH	15	KK	KN				3	3	100	Confident
344	P02768-1 SWISS-PROT:P02768-1 Tax_Id=9606 Gene_Symbol=ALB Isoform 1 of Serum albumin precursor; P02769 SWISS-PROT:P02769 (Bos taurus) Bovine serum albumin precursor	P02768-1 SWISS-PROT:P02768-1 Tax_Id=9606 Gene_Symbol=ALB Isoform 1 of Serum albumin precursor (Doubtful); P02769 SWISS-PROT:P02769 (Bos taurus) Bovine serum albumin precursor (Not Validated)	1	0	KVPQVSTPTLVEVSR	NH2-KVPQVSTPTLVEVSR-COOH	438; 437	TK; TR	NL; SL				6	6	100	Confident
345	GEPV01026995.1|:117-857(+)	GEPV01026995.1|:117-857(+) (Doubtful)	1	1	LYQVEYAFK	NH2-LYQVEYAFK-COOH	22	GR	AI				2	2	100	Confident
346	GEPV01016592.1|:89-1033(+)	GEPV01016592.1|:89-1033(+) (Doubtful)	1	1	SFDPVSFGK	NH2-SFDPVSFGK-COOH	4	SK	DF				3	3	100	Confident
347	GEPV01030146.1|:136-1074(+)	GEPV01030146.1|:136-1074(+) (Doubtful)	1	1	TLPYWNDVIVPQLK	NH2-TLPYWNDVIVPQLK-COOH	222	AR	EG				3	3	100	Confident
348	GEPV01029746.1|:1-813(-)	GEPV01029746.1|:1-813(-) (Doubtful)	1	1	AYTAQMTQTPGKFN	NH2-AYTAQMTQTPGKFN-COOH	201	SK	MD				3	3	100	Confident
349	GEPV01033441.1|:40-798(-); GEPV01033442.1|:40-822(-)	GEPV01033442.1|:40-822(-) (Doubtful)	1	1	DIQEQANYFR	NH2-DIQEQANYFR-COOH	111; 119	AK; AK	CV; CV				6	7	100	Confident
350	P00761 SWISS-PROT:P00761|TRYP_PIG Trypsin - Sus scrofa (Pig).	P00761 SWISS-PROT:P00761|TRYP_PIG Trypsin - Sus scrofa (Pig). (Doubtful)	1	1	VNWIQQTIAAN	NH2-VNWIQQTIAAN-COOH	221	NY					2	2	54.5455	Confident
351	GEPV01033026.1|:385-1125(-)	GEPV01033026.1|:385-1125(-) (Doubtful)	1	1	AKVDEPNSQADF	NH2-AKVDEPNSQADF-COOH	70	SR	GA				3	3	100	Confident
352	GEPV01029219.1|:661-1533(-)	GEPV01029219.1|:661-1533(-) (Doubtful)	1	1	YDYTGLEPSISGMIMEIHHTK	NH2-YDYTGLEPSISGMIMEIHHTK-COOH	94	LK	HH				9	9	100	Confident
353	GEPV01056980.1|:32-754(-)	GEPV01056980.1|:32-754(-) (Doubtful)	1	1	KIEDHNTLVFITDVR	NH2-KIEDHNTLVFITDVR-COOH	173	MK	AN				3	3	100	Confident
354	GEPV01029219.1|:661-1533(-)	GEPV01029219.1|:661-1533(-) (Doubtful)	1	1	YDYTGLEPSISGMIMEIHHTK	NH2-YDYTGLEPSISGM<ox>IMEIHHTK-COOH	94	LK	HH	Oxidation of M (13)		Oxidation of M (13: Very Confident)	3	3	100	Confident
355	GEPV01029219.1|:661-1533(-)	GEPV01029219.1|:661-1533(-) (Doubtful)	1	1	YDYTGLEPSISGMIMEIHHTK	NH2-YDYTGLEPSISGMIM<ox>EIHHTK-COOH	94	LK	HH	Oxidation of M (15)		Oxidation of M (15: Very Confident)	3	3	100	Confident
356	GEPV01033441.1|:40-798(-); GEPV01033442.1|:40-822(-)	GEPV01033442.1|:40-822(-) (Doubtful)	1	1	VMALLMANTIVGPDDFGLYE	NH2-VMALLMANTIVGPDDFGLYE-COOH	233; 241	ER; ER					3	3	100	Confident
357	GEPV01033624.1|:1089-1775(-)	GEPV01033624.1|:1089-1775(-) (Doubtful)	1	1	WLPLESNPEVMNK	NH2-WLPLESNPEVM<ox>NK-COOH	4	VR	FL	Oxidation of M (11)		Oxidation of M (11: Very Confident)	3	3	100	Confident
358	GEPV01033026.1|:385-1125(-)	GEPV01033026.1|:385-1125(-) (Doubtful)	1	1	AMAICLPMSDIVYPFTPALLR	NH2-AMAIC<cmm>LPMSDIVYPFTPALLR-COOH	162	CK	WS		Carbamidomethylation of C (5)		4	4	100	Doubtful
359	GEPV01033005.1|:2-391(-)	GEPV01033005.1|:2-391(-) (Doubtful)	1	1	FYQFDSSDGNSFPVDGIDVDLQR	NH2-FYQFDSSDGNSFPVDGIDVDLQR-COOH	66	ER	SN				6	6	100	Confident
360	GEPV01042675.1|:2-5101(-)	GEPV01042675.1|:2-5101(-) (Doubtful)	1	1	FPLQYVYHYR	NH2-FPLQYVYHYR-COOH	18	LQ	AK				3	3	100	Confident
361	GEPV01042407.1|:155-985(+); GEPV01042413.1|:151-981(+)	GEPV01042407.1|:155-985(+), GEPV01042413.1|:151-981(+) (Doubtful)	1	1	ILNVGMNR	NH2-ILNVGMNR-COOH	90; 90	LR; LR	LD; LD				1	1	100	Confident
362	GEPV01033026.1|:385-1125(-)	GEPV01033026.1|:385-1125(-) (Doubtful)	1	1	PNSQADFGASISSGK	NH2-PNSQADFGASISSGK-COOH	75	DE	GA				3	3	100	Confident
363	GEPV01042675.1|:2-5101(-)	GEPV01042675.1|:2-5101(-) (Doubtful)	1	1	GQSVVTQQASQLGQFPF	NH2-GQSVVTQQASQLGQFPF-COOH	84	GK	AL				5	7	100	Confident
364	GEPV01033441.1|:40-798(-); GEPV01033442.1|:40-822(-)	GEPV01033442.1|:40-822(-) (Doubtful)	1	1	MEVVASLK	NH2-MEVVASLK-COOH	147; 155	NR; NR	KD; KD				6	6	100	Confident
365	GEPV01032386.1|:318-1157(-)	GEPV01032386.1|:318-1157(-) (Doubtful)	1	1	DGATHVRPYDVANVK	NH2-DGATHVRPYDVANVK-COOH	219	TR	GK				1	1	100	Confident
366	GEPV01029747.1|:134-1438(-)	GEPV01029747.1|:134-1438(-) (Doubtful)	1	1	YPDHQPMGFPLDR	NH2-YPDHQPMGFPLDR-COOH	397	EK	RI				6	6	100	Confident
367	GEPV01007839.1|:1-441(-); GEPV01015871.1|:144-884(+)	GEPV01015871.1|:144-884(+) (Doubtful)	1	1	YDDMAAAMK	NH2-YDDMAAAM<ox>K-COOH	4; 20	ER; ER	KV; QV	Oxidation of M (8)		Oxidation of M (8: Very Confident)	1	2	99.7555	Confident
368	GEPV01045753.1|:119-760(+)	GEPV01045753.1|:119-760(+) (Doubtful)	1	1	FHLDAAQVIDPK	NH2-FHLDAAQVIDPK-COOH	162	FK	LK				3	3	100	Confident
369	P00761 SWISS-PROT:P00761|TRYP_PIG Trypsin - Sus scrofa (Pig).; P07477 SWISS-PROT:P07477 Tax_Id=9606 Gene_Symbol=PRSS1 Trypsin-1 precursor	P00761 SWISS-PROT:P00761|TRYP_PIG Trypsin - Sus scrofa (Pig). (Doubtful); P07477 SWISS-PROT:P07477 Tax_Id=9606 Gene_Symbol=PRSS1 Trypsin-1 precursor (Doubtful)	2	0	VLEGNEQFINAAK	NH2-VLEGNEQFINAAK-COOH	65; 80	ID; IE	II; II				1	1	100	Confident
370	GEPV01044415.1|:336-1211(+)	GEPV01044415.1|:336-1211(+) (Doubtful)	1	1	SLSLGSSVQTEVR	NH2-SLSLGSSVQTEVR-COOH	172	SR	AA				3	3	100	Confident
371	GEPV01040958.1|:520-1881(-)	GEPV01040958.1|:520-1881(-) (Doubtful)	1	1	QIVFDPNHR	pyro-QIVFDPNHR-COOH	383	VR	NA	Pyrolidone from Q (1)			3	3	100	Confident
372	P02768-1 SWISS-PROT:P02768-1 Tax_Id=9606 Gene_Symbol=ALB Isoform 1 of Serum albumin precursor	P02768-1 SWISS-PROT:P02768-1 Tax_Id=9606 Gene_Symbol=ALB Isoform 1 of Serum albumin precursor (Doubtful)	1	1	VFDEFKPLVEEPQNLIK	NH2-VFDEFKPLVEEPQNLIK-COOH	397	AK	QN				6	6	100	Confident
373	GEPV01043366.1|:132-719(+)	GEPV01043366.1|:132-719(+) (Doubtful)	1	1	YVSLYGEQSVLGR	NH2-YVSLYGEQSVLGR-COOH	148	DK	AV				2	2	100	Confident
374	GEPV01042675.1|:2-5101(-)	GEPV01042675.1|:2-5101(-) (Doubtful)	1	1	SSGIPDINKR	NH2-SSGIPDINKR-COOH	31	KV	HS				4	4	100	Confident
375	GEPV01033026.1|:385-1125(-)	GEPV01033026.1|:385-1125(-) (Doubtful)	1	1	AMAICLPMSDIVYPFTPALLR	NH2-AM<ox>AIC<cmm>LPMSDIVYPFTPALLR-COOH	162	CK	WS	Oxidation of M (2)	Carbamidomethylation of C (5)	Oxidation of M (2: Very Confident)	5	5	100	Confident
376	GEPV01033624.1|:1089-1775(-)	GEPV01033624.1|:1089-1775(-) (Doubtful)	1	1	KFPINHGPTSEENFLIDGASVLR	NH2-KFPINHGPTSEENFLIDGASVLR-COOH	185	RK	DF				9	9	100	Confident
377	GEPV01038994.1|:103-2094(-)	GEPV01038994.1|:103-2094(-) (Doubtful)	1	1	YGSEFPSRPDNK	NH2-YGSEFPSRPDNK-COOH	278	YR	CF				2	2	100	Confident
378	GEPV01033026.1|:385-1125(-)	GEPV01033026.1|:385-1125(-) (Doubtful)	1	1	VDEPNSQADFGA	NH2-VDEPNSQADFGA-COOH	72	AK	SI				1	1	100	Confident
379	GEPV01027768.1|:92-772(+)	GEPV01027768.1|:92-772(+) (Doubtful)	1	1	AEEEFTIEK	NH2-AEEEFTIEK-COOH	34	AR	GR				2	2	100	Confident
380	P02768-1 SWISS-PROT:P02768-1 Tax_Id=9606 Gene_Symbol=ALB Isoform 1 of Serum albumin precursor	P02768-1 SWISS-PROT:P02768-1 Tax_Id=9606 Gene_Symbol=ALB Isoform 1 of Serum albumin precursor (Doubtful)	1	1	RHPYFYAPELLFFAK	NH2-RHPYFYAPELLFFAK-COOH	169	AR	RY				7	7	100	Confident
381	GEPV01033624.1|:1089-1775(-)	GEPV01033624.1|:1089-1775(-) (Doubtful)	1	1	PVYALLLLYPLTSK	NH2-PVYALLLLYPLTSK-COOH	46	PR	SE				2	2	100	Confident
382	GEPV01026995.1|:117-857(+)	GEPV01026995.1|:117-857(+) (Doubtful)	1	1	HITIFSPEGR	NH2-HITIFSPEGR-COOH	12	DR	LY				1	1	100	Confident
383	GEPV01033624.1|:1089-1775(-)	GEPV01033624.1|:1089-1775(-) (Doubtful)	1	1	EQQESGIESAGQDLAEDLYYMK	NH2-EQQESGIESAGQDLAEDLYYM<ox>K-COOH	65	FK	QF	Oxidation of M (21)		Oxidation of M (21: Very Confident)	1	1	100	Confident
384	GEPV01044884.1|:1-735(+)	GEPV01044884.1|:1-735(+) (Doubtful)	1	1	LNSGDNHIK	NH2-LNSGDNHIK-COOH	200	TK	RK				3	3	100	Confident
385	GEPV01059273.1|:121-921(+)	GEPV01059273.1|:121-921(+) (Doubtful)	1	1	IKDFMSLEPGNLTMVTGGR	NH2-IKDFMSLEPGNLTMVTGGR-COOH	169	SK	NL				3	3	100	Confident
386	GEPV01030146.1|:136-1074(+)	GEPV01030146.1|:136-1074(+) (Doubtful)	1	1	AIESVAAQGK	NH2-AIESVAAQGK-COOH	301	RK	AK				2	2	100	Confident
387	GEPV01033026.1|:385-1125(-)	GEPV01033026.1|:385-1125(-) (Doubtful)	1	1	DALVAEVDTIPGAEPQLK	NH2-DALVAEVDTIPGAEPQLK-COOH	133	NY	TD				2	2	100	Confident
388	GEPV01042675.1|:2-5101(-)	GEPV01042675.1|:2-5101(-) (Doubtful)	1	1	ANLSVYVTSATR	NH2-ANLSVYVTSATR-COOH	49	LK	VV				3	3	100	Confident
389	GEPV01033624.1|:1089-1775(-)	GEPV01033624.1|:1089-1775(-) (Doubtful)	1	1	FLSGMGVPDSVK	NH2-FLSGMGVPDSVK-COOH	17	NK	VC				3	3	100	Confident
390	GEPV01033442.1|:40-822(-)	GEPV01033442.1|:40-822(-) (Doubtful)	1	1	FSEPAVSSNNGVENLFALAR	NH2-FSEPAVSSNNGVENLFALAR-COOH	80	TK	KR				4	4	100	Confident
391	GEPV01033026.1|:385-1125(-)	GEPV01033026.1|:385-1125(-) (Doubtful)	1	1	VTANDQLYALYNR	NH2-VTANDQLYALYNR-COOH	24	AR	QK				9	9	100	Confident
392	GEPV01043203.1|:1993-3006(-); GEPV01043204.1|:1912-2925(-)	GEPV01043203.1|:1993-3006(-), GEPV01043204.1|:1912-2925(-) (Doubtful)	1	1	ANGGIDTETGYPYK	NH2-ANGGIDTETGYPYK-COOH	198; 198	IK; IK	GI; GI				2	2	100	Confident
393	GEPV01033624.1|:1089-1775(-)	GEPV01033624.1|:1089-1775(-) (Doubtful)	1	1	SEEFKEQQESGIESAGQDLAEDLYYMK	NH2-SEEFKEQQESGIESAGQDLAEDLYYM<ox>K-COOH	60	SK	QF	Oxidation of M (26)		Oxidation of M (26: Very Confident)	2	2	100	Confident
394	GEPV01031197.1|:403-1020(-)	GEPV01031197.1|:403-1020(-) (Doubtful)	1	1	MDALENQLK	NH2-MDALENQLK-COOH	62	ER	EA				3	3	100	Confident
395	GEPV01038994.1|:103-2094(-)	GEPV01038994.1|:103-2094(-) (Doubtful)	1	1	KSSESSVTIPDR	NH2-KSSESSVTIPDR-COOH	534	IR	TP				1	1	100	Confident
396	GEPV01016592.1|:89-1033(+)	GEPV01016592.1|:89-1033(+) (Doubtful)	1	1	AAFFGLYDTAK	NH2-AAFFGLYDTAK-COOH	197	YR	GM				3	3	100	Confident
397	GEPV01045753.1|:119-760(+)	GEPV01045753.1|:119-760(+) (Doubtful)	1	1	GFTVHELR	NH2-GFTVHELR-COOH	74	GR	LA				3	3	100	Confident
398	P02768-1 SWISS-PROT:P02768-1 Tax_Id=9606 Gene_Symbol=ALB Isoform 1 of Serum albumin precursor	P02768-1 SWISS-PROT:P02768-1 Tax_Id=9606 Gene_Symbol=ALB Isoform 1 of Serum albumin precursor (Doubtful)	1	1	DDNPNLPR	NH2-DDNPNLPR-COOH	131	HK	LV				2	2	100	Confident
399	GEPV01027880.1|:366-1538(-)	GEPV01027880.1|:366-1538(-) (Not Validated)	0	1	VPLSSLPR	NH2-VPLSSLPR-COOH	228	KK	PV				0	9	45.4545	Doubtful
400	GEPV01029219.1|:661-1533(-)	GEPV01029219.1|:661-1533(-) (Doubtful)	1	1	ALQPSVLHPQIGLIFDHIK	NH2-ALQPSVLHPQIGLIFDHIK-COOH	59	GK	AE				12	12	100	Confident
401	P00761 SWISS-PROT:P00761|TRYP_PIG Trypsin - Sus scrofa (Pig).	P00761 SWISS-PROT:P00761|TRYP_PIG Trypsin - Sus scrofa (Pig). (Doubtful)	1	1	IDVLEGNEQFINAAK	NH2-IDVLEGNEQFINAAK-COOH	63	HN	II				2	2	100	Confident
402	GEPV01059273.1|:121-921(+)	GEPV01059273.1|:121-921(+) (Doubtful)	1	1	YALNYEEAK	NH2-YALNYEEAK-COOH	54	LK	KI				3	3	100	Confident
403	GEPV01031197.1|:403-1020(-)	GEPV01031197.1|:403-1020(-) (Doubtful)	1	1	LAMVEADLER	NH2-LAMVEADLER-COOH	90	RK	AE				3	3	100	Confident
404	GEPV01029543.1|:600-1619(-)	GEPV01029543.1|:600-1619(-) (Doubtful)	1	1	GEHTEAEGGIYDISNK	NH2-GEHTEAEGGIYDISNK-COOH	296	TR	RR				3	3	100	Confident
405	GEPV01043235.1|:2912-9880(-)	GEPV01043235.1|:2912-9880(-) (Doubtful)	1	1	YDITTPYADYQSVTVALAYNLR	NH2-YDITTPYADYQSVTVALAYNLR-COOH	616	LK	RK				1	1	100	Confident
406	GEPV01033026.1|:385-1125(-)	GEPV01033026.1|:385-1125(-) (Doubtful)	1	1	YDALVAEVDTIPGAEPQLK	NH2-YDALVAEVDTIPGAEPQLK-COOH	132	VN	TD				5	5	100	Confident
407	GEPV01031197.1|:403-1020(-)	GEPV01031197.1|:403-1020(-) (Doubtful)	1	1	SLEVSEEK	NH2-SLEVSEEK-COOH	127	LK	AN				3	3	100	Confident
408	P02768-1 SWISS-PROT:P02768-1 Tax_Id=9606 Gene_Symbol=ALB Isoform 1 of Serum albumin precursor	P02768-1 SWISS-PROT:P02768-1 Tax_Id=9606 Gene_Symbol=ALB Isoform 1 of Serum albumin precursor (Doubtful)	1	1	FYAPELLFFAK	NH2-FYAPELLFFAK-COOH	173	PY	RY				3	3	100	Confident
409	GEPV01040958.1|:520-1881(-)	GEPV01040958.1|:520-1881(-) (Doubtful)	1	1	LFSPPVLEDFAVR	NH2-LFSPPVLEDFAVR-COOH	370	RR	QI				3	3	100	Confident
410	GEPV01033442.1|:40-822(-)	GEPV01033442.1|:40-822(-) (Doubtful)	1	1	FSEPAVSSNNGVENLFALA	NH2-FSEPAVSSNNGVENLFALA-COOH	80	TK	RK				3	3	100	Confident
411	GEPV01031197.1|:403-1020(-)	GEPV01031197.1|:403-1020(-) (Doubtful)	1	1	KLAMVEADLER	NH2-KLAMVEADLER-COOH	89	AR	AE				3	3	100	Confident

## Sheet: Evi 15 kDa_proteins
	Main Accession	Description	Gene Name	Chromosome	MW [kDa]	Possible Coverage [%]	Coverage [%]	Spectrum Counting	Confidently Localized Modification Sites	# Confidently Localized Modification Sites	Ambiguously Localized Modification Sites	#Ambiguously Localized Modification Sites	Protein Inference	Secondary Accessions	Protein Group	#Validated Peptides	#Peptides	#Unique	#Validated Unique	#Unique to Group	#Validated Unique to Group	#Validated PSMs	#PSMs	Confidence [%]	Validation
18	GEPV01033441.1|:40-798(-)				28.4661	88.1	46.43	12814.4	Oxidation of M(M123, M126, M140, M147, M234, M238)	Oxidation of M(6)			Related Proteins	GEPV01033442.1|:40-822(-)	GEPV01033441.1|:40-798(-), GEPV01033442.1|:40-822(-)	45	51	51	45	51	45	363	394	100	Doubtful
22	P00761 SWISS-PROT:P00761|TRYP_PIG Trypsin - Sus scrofa (Pig).				24.3938	68.4	33.77	22736.2	Oxidation of M(M94)	Oxidation of M(1)			Single Protein		P00761 SWISS-PROT:P00761|TRYP_PIG Trypsin - Sus scrofa (Pig).	22	27	25	20	25	20	169	177	100	Doubtful
10	P02768-1 SWISS-PROT:P02768-1 Tax_Id=9606 Gene_Symbol=ALB Isoform 1 of Serum albumin precursor				69.3215	100	28.74	1998.85	Oxidation of M(M353)	Oxidation of M(1)			Single Protein		P02768-1 SWISS-PROT:P02768-1 Tax_Id=9606 Gene_Symbol=ALB Isoform 1 of Serum albumin precursor	21	24	22	19	24	21	78	82	100	Doubtful
1	GEPV01022888.1|:941-1474(-)				19.931	77.4	70.06	4724.95					Related Proteins	GEPV01022889.1|:900-1433(-)	GEPV01022888.1|:941-1474(-), GEPV01022889.1|:900-1433(-)	13	13	13	13	13	13	31	31	100	Doubtful
8	GEPV01019573.1|:100-606(+)				18.4054	100	51.19	3677.63					Single Protein		GEPV01019573.1|:100-606(+)	7	10	10	7	10	7	17	21	100	Doubtful
14	GEPV01054001.1|:212-940(+)				26.7494	80.99	28.93	2321.69					Single Protein		GEPV01054001.1|:212-940(+)	6	8	8	6	8	6	12	14	100	Doubtful
19	GEPV01033026.1|:385-1125(-)				27.1964	87.4	23.98	1167.94	Oxidation of M(M228)	Oxidation of M(1)			Single Protein		GEPV01033026.1|:385-1125(-)	6	7	7	6	7	6	8	10	100	Doubtful
24	GEPV01042675.1|:2-5101(-)				188.176	85.35	2.59	343.941					Single Protein		GEPV01042675.1|:2-5101(-)	4	7	7	4	7	4	14	17	100	Doubtful
25	GEPV01038168.1|:62-559(+)				18.6595	82.42	15.76	1622.29					Single Protein		GEPV01038168.1|:62-559(+)	2	5	5	2	5	2	5	9	100	Doubtful
27	GEPV01022689.1|:172-615(+)				16.9034	100	19.05	2341.2					Single Protein		GEPV01022689.1|:172-615(+)	3	5	5	3	5	3	7	9	100	Doubtful
3	P07477 SWISS-PROT:P07477 Tax_Id=9606 Gene_Symbol=PRSS1 Trypsin-1 precursor				26.5411	57.49	11.34	1719.3					Single Protein		P07477 SWISS-PROT:P07477 Tax_Id=9606 Gene_Symbol=PRSS1 Trypsin-1 precursor	3	4	2	1	2	1	6	11	100	Doubtful
4	GEPV01037052.1|:1-5142(+)				187.321	84.94	1.52	154.503					Single Protein		GEPV01037052.1|:1-5142(+)	1	4	4	1	4	1	3	9	90.9091	Doubtful
28	GEPV01030431.1|:92-565(+)				16.7186	100	42.68	4262.37					Single Protein		GEPV01030431.1|:92-565(+)	4	4	4	4	4	4	16	17	100	Doubtful
6	GEPV01031843.1|:198-2183(+)				72.3265	86.23	2.12	364.187					Single Protein		GEPV01031843.1|:198-2183(+)	1	3	3	1	3	1	3	6	83.7838	Doubtful
11	GEPV01038994.1|:103-2094(-)				75.5222	69.08	2.87	549.645					Single Protein		GEPV01038994.1|:103-2094(-)	2	3	3	2	3	2	5	7	100	Doubtful
17	GEPV01036921.1|:1-444(+)				17.0901	79.59	21.09	2861.47					Single Protein		GEPV01036921.1|:1-444(+)	3	3	3	3	3	3	9	9	100	Doubtful
23	GEPV01029747.1|:134-1438(-)				49.1814	82.95	3	1805.76	Oxidation of M(M403)	Oxidation of M(1)			Single Protein		GEPV01029747.1|:134-1438(-)	2	3	3	2	3	2	11	12	100	Doubtful
5	GEPV01016044.1|:99-557(+)				17.8718	100	13.16	2264.19					Single Protein		GEPV01016044.1|:99-557(+)	2	2	2	2	2	2	6	6	100	Doubtful
12	GEPV01022314.1|:1-732(+)				27.0341	67.62	0	0					Related Proteins	GEPV01022315.1|:1-765(+)	GEPV01022314.1|:1-732(+), GEPV01022315.1|:1-765(+)	0	2	2	0	2	0	0	2	83.7838	Doubtful
13	GEPV01042922.1|:66-3989(+)				140.85	77.43	0.84	71.4091					Single Protein		GEPV01042922.1|:66-3989(+)	1	2	2	1	2	1	1	2	100	Doubtful
29	GEPV01029270.1|:456-953(-)				17.8616	78.18	12.12	2371.45					Single Protein		GEPV01029270.1|:456-953(-)	2	2	2	2	2	2	5	5	100	Doubtful
2	GEPV01035897.1|:135-632(-)				17.9561	46.06	10.3	1006.3					Single Protein		GEPV01035897.1|:135-632(-)	1	1	1	1	1	1	1	1	100	Doubtful
7	GEPV01000391.1|:34-429(-)				15.3124	100	10.69	583.81					Related Proteins	GEPV01000392.1|:34-429(-)	GEPV01000391.1|:34-429(-), GEPV01000392.1|:34-429(-)	1	1	1	1	1	1	1	1	100	Doubtful
9	GEPV01043152.1|:118-1254(+)				42.115	67.72	3.17	298.747					Related Proteins	GEPV01043155.1|:3-1661(+)	GEPV01043152.1|:118-1254(+), GEPV01043155.1|:3-1661(+)	1	1	0	0	1	1	2	3	83.7838	Doubtful
15	GEPV01026301.1|:1-492(-)				18.1453	51.22	8.54	910.466					Related Proteins	GEPV01034057.1|:613-1281(-)	GEPV01026301.1|:1-492(-), GEPV01034057.1|:613-1281(-)	1	1	1	1	1	1	1	1	100	Doubtful
16	GEPV01024489.1|:65-1015(+)				36.1934	100	3.48	242.023					Single Protein		GEPV01024489.1|:65-1015(+)	1	1	1	1	1	1	1	5	90.9091	Doubtful
20	GEPV01026915.1|:3-356(-)				12.9231	100	7.63	1944.39					Single Protein		GEPV01026915.1|:3-356(-)	1	1	1	1	1	1	3	3	100	Doubtful
21	GEPV01011514.1|:143-526(+)				14.7476	100	7.87	602.198					Single Protein		GEPV01011514.1|:143-526(+)	1	1	1	1	1	1	1	1	100	Doubtful
26	GEPV01034051.1|:2-421(+)				15.713	100	10	546.28					Related Proteins	GEPV01034054.1|:3-761(-), GEPV01034055.1|:1-1071(-), GEPV01034059.1|:208-1551(-)	GEPV01034051.1|:2-421(+), GEPV01034054.1|:3-761(-), GEPV01034055.1|:1-1071(-), GEPV01034059.1|:208-1551(-)	1	1	1	1	1	1	1	1	100	Doubtful

## Sheet: Evi 15 kDa_peptides
	Protein(s)	Protein Group(s)	#Validated Protein Group(s)	Unique Database	Sequence	Modified Sequence	Position	AAs Before	AAs After	Variable Modifications	Fixed Modifications	Localization Confidence	#Validated PSMs	#PSMs	Confidence [%]	Validation
1	GEPV01033441.1|:40-798(-); GEPV01033442.1|:40-822(-)	GEPV01033441.1|:40-798(-), GEPV01033442.1|:40-822(-) (Doubtful)	1	1	NELDLTSMTAHVNR	NH2-NELDLTSMTAHVNR-COOH	133; 141	SN; SN	ME; ME				5	5	100	Doubtful
2	GEPV01054001.1|:212-940(+)	GEPV01054001.1|:212-940(+) (Doubtful)	1	1	SGLGQPIPSPQEATFR	NH2-SGLGQPIPSPQEATFR-COOH	118	LK	NK				3	3	100	Doubtful
3	GEPV01033441.1|:40-798(-); GEPV01033442.1|:40-822(-)	GEPV01033441.1|:40-798(-), GEPV01033442.1|:40-822(-) (Doubtful)	1	1	MEVVASLKK	NH2-M<ox>EVVASLKK-COOH	147; 155	NR; NR	DL; DL	Oxidation of M (1)		Oxidation of M (1: Very Confident)	3	3	100	Doubtful
4	P00761 SWISS-PROT:P00761|TRYP_PIG Trypsin - Sus scrofa (Pig).	P00761 SWISS-PROT:P00761|TRYP_PIG Trypsin - Sus scrofa (Pig). (Doubtful)	1	1	LSSPATLNSR	NH2-LSSPATLNSR-COOH	98	IK	VA				11	11	100	Doubtful
5	GEPV01038168.1|:62-559(+)	GEPV01038168.1|:62-559(+) (Doubtful)	1	1	DEFPVIWSLTDR	NH2-DEFPVIWSLTDR-COOH	138	PR	ET				3	3	100	Doubtful
6	GEPV01054001.1|:212-940(+)	GEPV01054001.1|:212-940(+) (Doubtful)	1	1	KFSNLYTSLEK	NH2-KFSNLYTSLEK-COOH	215	MR	MS				1	1	100	Doubtful
7	P02768-1 SWISS-PROT:P02768-1 Tax_Id=9606 Gene_Symbol=ALB Isoform 1 of Serum albumin precursor	P02768-1 SWISS-PROT:P02768-1 Tax_Id=9606 Gene_Symbol=ALB Isoform 1 of Serum albumin precursor (Doubtful)	1	1	LVNEVTEFAK	NH2-LVNEVTEFAK-COOH	66	VK	TC				3	3	100	Doubtful
8	GEPV01019573.1|:100-606(+)	GEPV01019573.1|:100-606(+) (Doubtful)	1	1	AADAGAGAAAMEFR	NH2-AADAGAGAAAMEFR-COOH	146	DK	GL				1	1	100	Doubtful
9	P02768-1 SWISS-PROT:P02768-1 Tax_Id=9606 Gene_Symbol=ALB Isoform 1 of Serum albumin precursor	P02768-1 SWISS-PROT:P02768-1 Tax_Id=9606 Gene_Symbol=ALB Isoform 1 of Serum albumin precursor (Doubtful)	1	1	TYETTLEK	NH2-TYETTLEK-COOH	376	AK	CC				2	2	100	Doubtful
10	GEPV01038994.1|:103-2094(-)	GEPV01038994.1|:103-2094(-) (Doubtful)	1	1	TPFATLIK	NH2-TPFATLIK-COOH	546	DR	EA				2	3	100	Doubtful
11	GEPV01022888.1|:941-1474(-); GEPV01022889.1|:900-1433(-)	GEPV01022888.1|:941-1474(-), GEPV01022889.1|:900-1433(-) (Doubtful)	1	1	SVPQAENIEILH	NH2-SVPQAENIEILH-COOH	166; 166	QY; QY					2	2	100	Doubtful
12	GEPV01033441.1|:40-798(-); GEPV01033442.1|:40-822(-)	GEPV01033441.1|:40-798(-), GEPV01033442.1|:40-822(-) (Doubtful)	1	1	MEVVASLKK	NH2-MEVVASLKK-COOH	147; 155	NR; NR	DL; DL				3	3	100	Doubtful
13	GEPV01033441.1|:40-798(-); GEPV01033442.1|:40-822(-)	GEPV01033441.1|:40-798(-), GEPV01033442.1|:40-822(-) (Doubtful)	1	1	LDFLANDRER	NH2-LDFLANDRER-COOH	223; 231	GR; GR	VM; VM				12	15	100	Doubtful
14	GEPV01033026.1|:385-1125(-)	GEPV01033026.1|:385-1125(-) (Doubtful)	1	1	NVLDEGSDFLW	NH2-NVLDEGSDFLW-COOH	236	AR					2	3	99.3506	Doubtful
15	GEPV01022689.1|:172-615(+)	GEPV01022689.1|:172-615(+) (Doubtful)	1	1	EDSSFYIGK	NH2-EDSSFYIGK-COOH	75	TK	KC				3	3	100	Doubtful
16	GEPV01033441.1|:40-798(-); GEPV01033442.1|:40-822(-)	GEPV01033441.1|:40-798(-), GEPV01033442.1|:40-822(-) (Doubtful)	1	1	FLVEQFDLKGTDGR	NH2-FLVEQFDLKGTDGR-COOH	209; 217	AR; AR	LD; LD				6	6	100	Doubtful
17	GEPV01019573.1|:100-606(+)	GEPV01019573.1|:100-606(+) (Doubtful)	1	1	SHLVQIYEHLFK	NH2-SHLVQIYEHLFK-COOH	6	PK	EG				1	1	100	Doubtful
18	GEPV01033441.1|:40-798(-); GEPV01033442.1|:40-822(-)	GEPV01033441.1|:40-798(-), GEPV01033442.1|:40-822(-) (Doubtful)	1	1	DFLANDRER	NH2-DFLANDRER-COOH	224; 232	RL; RL	VM; VM				3	3	100	Doubtful
19	GEPV01033441.1|:40-798(-); GEPV01033442.1|:40-822(-)	GEPV01033441.1|:40-798(-), GEPV01033442.1|:40-822(-) (Doubtful)	1	1	DAYPLPADVVTTQHY	NH2-DAYPLPADVVTTQHY-COOH	176; 184	NK; NK	LF; LF				9	9	100	Doubtful
20	GEPV01034051.1|:2-421(+); GEPV01034054.1|:3-761(-); GEPV01034055.1|:1-1071(-); GEPV01034059.1|:208-1551(-)	GEPV01034051.1|:2-421(+), GEPV01034054.1|:3-761(-), GEPV01034055.1|:1-1071(-), GEPV01034059.1|:208-1551(-) (Doubtful)	1	1	LIGQIVSSITASLR	NH2-LIGQIVSSITASLR-COOH	24; 136; 230; 228	NR; NR; NR; NR	FA; FD; FD; FD				1	1	100	Doubtful
21	GEPV01033441.1|:40-798(-); GEPV01033442.1|:40-822(-)	GEPV01033441.1|:40-798(-), GEPV01033442.1|:40-822(-) (Doubtful)	1	1	ITDSNNELDLTSMTAHVNR	NH2-ITDSNNELDLTSMTAHVNR-COOH	128; 136	MG; MG	ME; ME				3	3	100	Doubtful
22	GEPV01016044.1|:99-557(+); GEPV01059835.1|:2-433(-)	GEPV01016044.1|:99-557(+) (Doubtful)	1	1	IPDWFLNR	NH2-IPDWFLNR-COOH	79; 80	YK; YK	QK; QK				3	3	100	Doubtful
23	P00761 SWISS-PROT:P00761|TRYP_PIG Trypsin - Sus scrofa (Pig).	P00761 SWISS-PROT:P00761|TRYP_PIG Trypsin - Sus scrofa (Pig). (Doubtful)	1	1	LGEHNIDVLEGNEQFINAA	NH2-LGEHNIDVLEGNEQFINAA-COOH	58	VR	KI				3	3	100	Doubtful
24	GEPV01033441.1|:40-798(-); GEPV01033442.1|:40-822(-)	GEPV01033441.1|:40-798(-), GEPV01033442.1|:40-822(-) (Doubtful)	1	1	ELDLTSMTAHVNR	NH2-ELDLTSMTAHVNR-COOH	134; 142	NN; NN	ME; ME				6	6	100	Doubtful
25	GEPV01033026.1|:385-1125(-)	GEPV01033026.1|:385-1125(-) (Doubtful)	1	1	MFALVWAR	NH2-MFALVWAR-COOH	228	DK	NV				2	2	100	Doubtful
26	P00761 SWISS-PROT:P00761|TRYP_PIG Trypsin - Sus scrofa (Pig).	P00761 SWISS-PROT:P00761|TRYP_PIG Trypsin - Sus scrofa (Pig). (Doubtful)	1	1	FNGNTLDNDIMLIK	NH2-FNGNTLDNDIMLIK-COOH	84	PN	LS				3	3	100	Doubtful
27	P00761 SWISS-PROT:P00761|TRYP_PIG Trypsin - Sus scrofa (Pig).	P00761 SWISS-PROT:P00761|TRYP_PIG Trypsin - Sus scrofa (Pig). (Doubtful)	1	1	TLDNDIMLIK	NH2-TLDNDIMLIK-COOH	88	GN	LS				2	2	66.6667	Doubtful
28	P02768-1 SWISS-PROT:P02768-1 Tax_Id=9606 Gene_Symbol=ALB Isoform 1 of Serum albumin precursor	P02768-1 SWISS-PROT:P02768-1 Tax_Id=9606 Gene_Symbol=ALB Isoform 1 of Serum albumin precursor (Doubtful)	1	1	SLHTLFGDK	NH2-SLHTLFGDK-COOH	89	DK	LC				3	3	100	Doubtful
29	P02768-1 SWISS-PROT:P02768-1 Tax_Id=9606 Gene_Symbol=ALB Isoform 1 of Serum albumin precursor	P02768-1 SWISS-PROT:P02768-1 Tax_Id=9606 Gene_Symbol=ALB Isoform 1 of Serum albumin precursor (Doubtful)	1	1	DVFLGMFLYEYAR	NH2-DVFLGM<ox>FLYEYAR-COOH	348	AK	RH	Oxidation of M (6)		Oxidation of M (6: Very Confident)	3	3	100	Doubtful
30	P02768-1 SWISS-PROT:P02768-1 Tax_Id=9606 Gene_Symbol=ALB Isoform 1 of Serum albumin precursor; P02769 SWISS-PROT:P02769 (Bos taurus) Bovine serum albumin precursor	P02768-1 SWISS-PROT:P02768-1 Tax_Id=9606 Gene_Symbol=ALB Isoform 1 of Serum albumin precursor (Doubtful); P02769 SWISS-PROT:P02769 (Bos taurus) Bovine serum albumin precursor (Not Validated)	1	0	FQNALLVR	NH2-FQNALLVR-COOH	427; 426	YK; YG	YT; YT				3	3	100	Doubtful
31	P02768-1 SWISS-PROT:P02768-1 Tax_Id=9606 Gene_Symbol=ALB Isoform 1 of Serum albumin precursor	P02768-1 SWISS-PROT:P02768-1 Tax_Id=9606 Gene_Symbol=ALB Isoform 1 of Serum albumin precursor (Doubtful)	1	1	AEFAEVSK	NH2-AEFAEVSK-COOH	250	PK	LV				3	3	100	Doubtful
32	GEPV01033441.1|:40-798(-); GEPV01033442.1|:40-822(-)	GEPV01033441.1|:40-798(-), GEPV01033442.1|:40-822(-) (Doubtful)	1	1	GITDSNNELDLTSMTAHVNR	NH2-GITDSNNELDLTSMTAHVNR-COOH	127; 135	EM; EM	ME; ME				7	7	100	Doubtful
33	P02768-1 SWISS-PROT:P02768-1 Tax_Id=9606 Gene_Symbol=ALB Isoform 1 of Serum albumin precursor	P02768-1 SWISS-PROT:P02768-1 Tax_Id=9606 Gene_Symbol=ALB Isoform 1 of Serum albumin precursor (Doubtful)	1	1	QTALVELVK	NH2-QTALVELVK-COOH	550	KK	HK				3	3	100	Doubtful
34	P00761 SWISS-PROT:P00761|TRYP_PIG Trypsin - Sus scrofa (Pig).	P00761 SWISS-PROT:P00761|TRYP_PIG Trypsin - Sus scrofa (Pig). (Doubtful)	1	1	VATVSLPR	NH2-VATVSLPR-COOH	108	SR	SC				18	18	100	Doubtful
35	GEPV01033026.1|:385-1125(-)	GEPV01033026.1|:385-1125(-) (Doubtful)	1	1	VDEPNSQADFGASISSGK	NH2-VDEPNSQADFGASISSGK-COOH	72	AK	GA				1	1	100	Doubtful
36	GEPV01033026.1|:385-1125(-)	GEPV01033026.1|:385-1125(-) (Doubtful)	1	1	AYNEQLQVAK	NH2-AYNEQLQVAK-COOH	51	VR	AT				1	1	100	Doubtful
37	GEPV01033441.1|:40-798(-); GEPV01033442.1|:40-822(-)	GEPV01033441.1|:40-798(-), GEPV01033442.1|:40-822(-) (Doubtful)	1	1	DAYPLPADVVTTQH	NH2-DAYPLPADVVTTQH-COOH	176; 184	NK; NK	YL; YL				8	8	100	Doubtful
38	P00761 SWISS-PROT:P00761|TRYP_PIG Trypsin - Sus scrofa (Pig).	P00761 SWISS-PROT:P00761|TRYP_PIG Trypsin - Sus scrofa (Pig). (Doubtful)	1	1	LGEHNIDVLEGNEQF	NH2-LGEHNIDVLEGNEQF-COOH	58	VR	IN				2	2	100	Doubtful
39	GEPV01041568.1|:1597-5514(-); GEPV01041569.1|:1597-5775(-)	GEPV01041568.1|:1597-5514(-), GEPV01041569.1|:1597-5775(-) (Not Validated); GEPV01041569.1|:1597-5775(-) (Not Validated)	0	0	YPDNLKMQGK	NH2-YPDNLKMQGK-COOH	950; 1037	KR; KR	FE; FE				0	10	40	Doubtful
40	GEPV01033441.1|:40-798(-); GEPV01033442.1|:40-822(-)	GEPV01033441.1|:40-798(-), GEPV01033442.1|:40-822(-) (Doubtful)	1	1	YPSNVVSDIAK	NH2-YPSNVVSDIAK-COOH	100; 108	IR; IR	DI; DI				24	24	100	Doubtful
41	GEPV01035897.1|:135-632(-)	GEPV01035897.1|:135-632(-) (Doubtful)	1	1	GQHGVQTLPAYIGGGPR	NH2-GQHGVQTLPAYIGGGPR-COOH	35	GK	PG				1	1	100	Doubtful
42	GEPV01029270.1|:456-953(-)	GEPV01029270.1|:456-953(-) (Doubtful)	1	1	IGPLGLSPK	NH2-IGPLGLSPK-COOH	32	PK	KV				2	2	100	Doubtful
43	GEPV01033441.1|:40-798(-); GEPV01033442.1|:40-822(-)	GEPV01033441.1|:40-798(-), GEPV01033442.1|:40-822(-) (Doubtful)	1	1	MEVVASLK	NH2-M<ox>EVVASLK-COOH	147; 155	NR; NR	KD; KD	Oxidation of M (1)		Oxidation of M (1: Very Confident)	53	56	100	Doubtful
44	P00761 SWISS-PROT:P00761|TRYP_PIG Trypsin - Sus scrofa (Pig).	P00761 SWISS-PROT:P00761|TRYP_PIG Trypsin - Sus scrofa (Pig). (Doubtful)	1	1	LGEHNIDVLEGNEQFINA	NH2-LGEHNIDVLEGNEQFINA-COOH	58	VR	AK				1	1	73.3333	Doubtful
45	GEPV01033441.1|:40-798(-); GEPV01033442.1|:40-822(-)	GEPV01033441.1|:40-798(-), GEPV01033442.1|:40-822(-) (Doubtful)	1	1	CVMTEMGITDSNNELDLTSMTAHVNR	pyro-CVMTEMGITDSNNELDLTSMTAHVNR-COOH	121; 129	FR; FR	ME; ME	Pyrolidone from carbamidomethylated C (1)	Carbamidomethylation of C (1)		2	2	100	Doubtful
46	GEPV01022888.1|:941-1474(-); GEPV01022889.1|:900-1433(-)	GEPV01022888.1|:941-1474(-), GEPV01022889.1|:900-1433(-) (Doubtful)	1	1	DTAVDIKDR	NH2-DTAVDIKDR-COOH	90; 90	VR; VR	TK; TK				1	1	100	Doubtful
47	GEPV01042675.1|:2-5101(-)	GEPV01042675.1|:2-5101(-) (Doubtful)	1	1	LTGVAAAQR	NH2-LTGVAAAQR-COOH	170	HK	EL				3	3	100	Doubtful
48	GEPV01033441.1|:40-798(-); GEPV01033442.1|:40-822(-)	GEPV01033441.1|:40-798(-), GEPV01033442.1|:40-822(-) (Doubtful)	1	1	FLANDRER	NH2-FLANDRER-COOH	225; 233	LD; LD	VM; VM				3	3	100	Doubtful
49	P02768-1 SWISS-PROT:P02768-1 Tax_Id=9606 Gene_Symbol=ALB Isoform 1 of Serum albumin precursor	P02768-1 SWISS-PROT:P02768-1 Tax_Id=9606 Gene_Symbol=ALB Isoform 1 of Serum albumin precursor (Doubtful)	1	1	HPYFYAPELLFFAK	NH2-HPYFYAPELLFFAK-COOH	170	RR	RY				5	5	100	Doubtful
50	GEPV01019573.1|:100-606(+)	GEPV01019573.1|:100-606(+) (Doubtful)	1	1	HPELTTIPNLHVVK	NH2-HPELTTIPNLHVVK-COOH	32	PK	SM				4	4	100	Doubtful
51	P02768-1 SWISS-PROT:P02768-1 Tax_Id=9606 Gene_Symbol=ALB Isoform 1 of Serum albumin precursor	P02768-1 SWISS-PROT:P02768-1 Tax_Id=9606 Gene_Symbol=ALB Isoform 1 of Serum albumin precursor (Doubtful)	1	1	DVFLGMFLYEYAR	NH2-DVFLGMFLYEYAR-COOH	348	AK	RH				3	3	100	Doubtful
52	GEPV01019573.1|:100-606(+)	GEPV01019573.1|:100-606(+) (Doubtful)	1	1	DFLHLPAEIVPATLK	NH2-DFLHLPAEIVPATLK-COOH	79	LR	KQ				5	5	100	Doubtful
53	GEPV01038168.1|:62-559(+)	GEPV01038168.1|:62-559(+) (Doubtful)	1	1	WNSWFQVPLPGQVR	NH2-WNSWFQVPLPGQVR-COOH	93	GR	DA				2	2	100	Doubtful
54	GEPV01029747.1|:134-1438(-)	GEPV01029747.1|:134-1438(-) (Doubtful)	1	1	YPDHQPMGFPLDR	NH2-YPDHQPM<ox>GFPLDR-COOH	397	EK	RI	Oxidation of M (7)		Oxidation of M (7: Very Confident)	5	5	100	Doubtful
55	P00761 SWISS-PROT:P00761|TRYP_PIG Trypsin - Sus scrofa (Pig).	P00761 SWISS-PROT:P00761|TRYP_PIG Trypsin - Sus scrofa (Pig). (Doubtful)	1	1	IITHPNFNGNTLDNDIMLIKLSSPATLNSR	NH2-IITHPNFNGNTLDNDIMLIKLSSPATLNSR-COOH	78	AK	VA				1	1	100	Doubtful
56	GEPV01011514.1|:143-526(+)	GEPV01011514.1|:143-526(+) (Doubtful)	1	1	SIGAVNIVIR	NH2-SIGAVNIVIR-COOH	57	RR	QT				1	1	100	Doubtful
57	GEPV01022888.1|:941-1474(-); GEPV01022889.1|:900-1433(-)	GEPV01022888.1|:941-1474(-), GEPV01022889.1|:900-1433(-) (Doubtful)	1	1	DGEPLQQYSVPQAENIEILH	NH2-DGEPLQQYSVPQAENIEILH-COOH	158; 158	RR; RR					4	4	100	Doubtful
58	GEPV01022888.1|:941-1474(-); GEPV01022889.1|:900-1433(-)	GEPV01022888.1|:941-1474(-), GEPV01022889.1|:900-1433(-) (Doubtful)	1	1	PATNYITQNLPEK	NH2-PATNYITQNLPEK-COOH	67; 67	LR; LR	TP; TP				3	3	100	Doubtful
59	GEPV01022689.1|:172-615(+)	GEPV01022689.1|:172-615(+) (Doubtful)	1	1	QHVQTALLK	pyro-QHVQTALLK-COOH	59	RR	IE	Pyrolidone from Q (1)			1	1	100	Doubtful
60	GEPV01029270.1|:456-953(-)	GEPV01029270.1|:456-953(-) (Doubtful)	1	1	SQAVLFSSTVK	NH2-SQAVLFSSTVK-COOH	120	PR	EI				3	3	100	Doubtful
61	GEPV01026301.1|:1-492(-); GEPV01034057.1|:613-1281(-)	GEPV01026301.1|:1-492(-), GEPV01034057.1|:613-1281(-) (Doubtful)	1	1	LISQVISSLTASLR	NH2-LISQVISSLTASLR-COOH	108; 2	NR; R	FD; FD				1	1	100	Doubtful
62	GEPV01022888.1|:941-1474(-); GEPV01022889.1|:900-1433(-)	GEPV01022888.1|:941-1474(-), GEPV01022889.1|:900-1433(-) (Doubtful)	1	1	NWLRPATNYITQNLPEK	NH2-NWLRPATNYITQNLPEK-COOH	63; 63	LR; LR	TP; TP				2	2	100	Doubtful
63	P00761 SWISS-PROT:P00761|TRYP_PIG Trypsin - Sus scrofa (Pig).	P00761 SWISS-PROT:P00761|TRYP_PIG Trypsin - Sus scrofa (Pig). (Doubtful)	1	1	SPATLNSR	NH2-SPATLNSR-COOH	100	LS	VA				3	3	99.3671	Doubtful
64	GEPV01022888.1|:941-1474(-); GEPV01022889.1|:900-1433(-)	GEPV01022888.1|:941-1474(-), GEPV01022889.1|:900-1433(-) (Doubtful)	1	1	TPTELAQDVR	NH2-TPTELAQDVR-COOH	80; 80	EK; EK	DT; DT				4	4	100	Doubtful
65	GEPV01054001.1|:212-940(+)	GEPV01054001.1|:212-940(+) (Doubtful)	1	1	MSNLGLAQHIFDK	NH2-MSNLGLAQHIFDK-COOH	226	EK	SL				1	1	100	Doubtful
66	GEPV01033441.1|:40-798(-); GEPV01033442.1|:40-822(-)	GEPV01033441.1|:40-798(-), GEPV01033442.1|:40-822(-) (Doubtful)	1	1	SNVVSDIAK	NH2-SNVVSDIAK-COOH	102; 110	YP; YP	DI; DI				8	8	100	Doubtful
67	GEPV01042675.1|:2-5101(-)	GEPV01042675.1|:2-5101(-) (Doubtful)	1	1	SIVSLFNIPPLK	NH2-SIVSLFNIPPLK-COOH	123	YK	EA				3	3	100	Doubtful
68	GEPV01026376.1|:139-549(+)	GEPV01026376.1|:139-549(+) (Not Validated)	0	1	YRPGTVALR	NH2-YRPGTVALR-COOH	42	HR	EI				1	1	80	Doubtful
69	GEPV01022689.1|:172-615(+)	GEPV01022689.1|:172-615(+) (Doubtful)	1	1	VVLTDLPLSR	NH2-VVLTDLPLSR-COOH	2	M	LN				3	3	100	Doubtful
70	P02768-1 SWISS-PROT:P02768-1 Tax_Id=9606 Gene_Symbol=ALB Isoform 1 of Serum albumin precursor	P02768-1 SWISS-PROT:P02768-1 Tax_Id=9606 Gene_Symbol=ALB Isoform 1 of Serum albumin precursor (Doubtful)	1	1	KQTALVELVK	NH2-KQTALVELVK-COOH	549	IK	HK				3	3	100	Doubtful
71	GEPV01042675.1|:2-5101(-)	GEPV01042675.1|:2-5101(-) (Doubtful)	1	1	ELFGDHHVTR	NH2-ELFGDHHVTR-COOH	179	QR	DV				5	5	100	Doubtful
72	GEPV01022888.1|:941-1474(-); GEPV01022889.1|:900-1433(-)	GEPV01022888.1|:941-1474(-), GEPV01022889.1|:900-1433(-) (Doubtful)	1	1	QMYETASSGVQAADR	NH2-QMYETASSGVQAADR-COOH	133; 133	FR; FR	QV; QV				2	2	100	Doubtful
73	GEPV01026915.1|:3-356(-)	GEPV01026915.1|:3-356(-) (Doubtful)	1	1	LLLPGELAK	NH2-LLLPGELAK-COOH	100	VR	HA				3	3	100	Doubtful
74	P02768-1 SWISS-PROT:P02768-1 Tax_Id=9606 Gene_Symbol=ALB Isoform 1 of Serum albumin precursor	P02768-1 SWISS-PROT:P02768-1 Tax_Id=9606 Gene_Symbol=ALB Isoform 1 of Serum albumin precursor (Doubtful)	1	1	LDELRDEGK	NH2-LDELRDEGK-COOH	206	PK	AS				3	3	100	Doubtful
75	GEPV01022888.1|:941-1474(-); GEPV01022889.1|:900-1433(-)	GEPV01022888.1|:941-1474(-), GEPV01022889.1|:900-1433(-) (Doubtful)	1	1	QVAQWLNNR	NH2-QVAQWLNNR-COOH	148; 148	DR; DR	RD; RD				3	3	100	Doubtful
76	GEPV01019573.1|:100-606(+)	GEPV01019573.1|:100-606(+) (Doubtful)	1	1	GFVEENFAWR	NH2-GFVEENFAWR-COOH	54	SR	HY				2	2	100	Doubtful
77	GEPV01036921.1|:1-444(+)	GEPV01036921.1|:1-444(+) (Doubtful)	1	1	LQGTDPEDVIK	NH2-LQGTDPEDVIK-COOH	69	ER	NA				3	3	100	Doubtful
78	GEPV01033441.1|:40-798(-); GEPV01033442.1|:40-822(-)	GEPV01033441.1|:40-798(-), GEPV01033442.1|:40-822(-) (Doubtful)	1	1	VMALLMANTIVGPDDFGLYE	NH2-VM<ox>ALLM<ox>ANTIVGPDDFGLYE-COOH	233; 241	ER; ER		Oxidation of M (2, 6)		Oxidation of M (2: Very Confident, 6: Very Confident)	17	19	100	Doubtful
79	GEPV01033441.1|:40-798(-); GEPV01033442.1|:40-822(-)	GEPV01033441.1|:40-798(-), GEPV01033442.1|:40-822(-) (Doubtful)	1	1	LMANTIVGPDDFGLYE	NH2-LM<ox>ANTIVGPDDFGLYE-COOH	237; 245	AL; AL		Oxidation of M (2)		Oxidation of M (2: Very Confident)	7	8	100	Doubtful
80	GEPV01033441.1|:40-798(-); GEPV01033442.1|:40-822(-)	GEPV01033441.1|:40-798(-), GEPV01033442.1|:40-822(-) (Doubtful)	1	1	LMANTIVGPDDFGLYE	NH2-LMANTIVGPDDFGLYE-COOH	237; 245	AL; AL					4	4	100	Doubtful
81	GEPV01030431.1|:92-565(+)	GEPV01030431.1|:92-565(+) (Doubtful)	1	1	HSTFYTGYSK	NH2-HSTFYTGYSK-COOH	143	EK	VI				3	3	100	Doubtful
82	P00761 SWISS-PROT:P00761|TRYP_PIG Trypsin - Sus scrofa (Pig).	P00761 SWISS-PROT:P00761|TRYP_PIG Trypsin - Sus scrofa (Pig). (Doubtful)	1	1	IITHPNFNGNTLDNDIMLIK	NH2-IITHPNFNGNTLDNDIMLIK-COOH	78	AK	LS				26	26	100	Doubtful
83	GEPV01054001.1|:212-940(+)	GEPV01054001.1|:212-940(+) (Doubtful)	1	1	FSNLYTSLEK	NH2-FSNLYTSLEK-COOH	216	RK	MS				1	1	100	Doubtful
84	P00761 SWISS-PROT:P00761|TRYP_PIG Trypsin - Sus scrofa (Pig).	P00761 SWISS-PROT:P00761|TRYP_PIG Trypsin - Sus scrofa (Pig). (Doubtful)	1	1	LGEHNIDVLEGN	NH2-LGEHNIDVLEGN-COOH	58	VR	EQ				3	3	100	Doubtful
85	P00761 SWISS-PROT:P00761|TRYP_PIG Trypsin - Sus scrofa (Pig).	P00761 SWISS-PROT:P00761|TRYP_PIG Trypsin - Sus scrofa (Pig). (Doubtful)	1	1	LGEHNIDVLEGNEQFINAAK	NH2-LGEHNIDVLEGNEQFINAAK-COOH	58	VR	II				28	32	100	Doubtful
86	P00761 SWISS-PROT:P00761|TRYP_PIG Trypsin - Sus scrofa (Pig).	P00761 SWISS-PROT:P00761|TRYP_PIG Trypsin - Sus scrofa (Pig). (Doubtful)	1	1	LGEHNIDVLEGNEQFIN	NH2-LGEHNIDVLEGNEQFIN-COOH	58	VR	AA				9	9	100	Doubtful
87	P00761 SWISS-PROT:P00761|TRYP_PIG Trypsin - Sus scrofa (Pig).	P00761 SWISS-PROT:P00761|TRYP_PIG Trypsin - Sus scrofa (Pig). (Doubtful)	1	1	LGEHNIDVLEGNEQ	NH2-LGEHNIDVLEGNEQ-COOH	58	VR	FI				3	3	100	Doubtful
88	GEPV01031843.1|:198-2183(+)	GEPV01031843.1|:198-2183(+) (Doubtful)	1	1	MRFSSGGTNTAELR	NH2-MRFSSGGTNTAELR-COOH	496	DK	LT				3	3	99.359	Doubtful
89	GEPV01033441.1|:40-798(-); GEPV01033442.1|:40-822(-)	GEPV01033441.1|:40-798(-), GEPV01033442.1|:40-822(-) (Doubtful)	1	1	CVMTEMGITDSNNELDLTSMTAHVNR	NH2-C<cmm>VM<ox>TEMGITDSNNELDLTSMTAHVNR-COOH	121; 129	FR; FR	ME; ME	Oxidation of M (3)	Carbamidomethylation of C (1)	Oxidation of M (3: Very Confident)	2	2	100	Doubtful
90	GEPV01033441.1|:40-798(-); GEPV01033442.1|:40-822(-)	GEPV01033441.1|:40-798(-), GEPV01033442.1|:40-822(-) (Doubtful)	1	1	CVMTEMGITDSNNELDLTSMTAHVNR	NH2-C<cmm>VMTEM<ox>GITDSNNELDLTSMTAHVNR-COOH	121; 129	FR; FR	ME; ME	Oxidation of M (6)	Carbamidomethylation of C (1)	Oxidation of M (6: Very Confident)	1	1	100	Doubtful
91	P00761 SWISS-PROT:P00761|TRYP_PIG Trypsin - Sus scrofa (Pig).	P00761 SWISS-PROT:P00761|TRYP_PIG Trypsin - Sus scrofa (Pig). (Doubtful)	1	1	GNTLDNDIMLIK	NH2-GNTLDNDIMLIK-COOH	86	FN	LS				3	3	100	Doubtful
92	GEPV01038994.1|:103-2094(-)	GEPV01038994.1|:103-2094(-) (Doubtful)	1	1	SSESSVTIPDR	NH2-SSESSVTIPDR-COOH	535	RK	TP				3	3	100	Doubtful
93	GEPV01033441.1|:40-798(-); GEPV01033442.1|:40-822(-)	GEPV01033441.1|:40-798(-), GEPV01033442.1|:40-822(-) (Doubtful)	1	1	GITDSNNELDLTSMTAHVNR	NH2-GITDSNNELDLTSM<ox>TAHVNR-COOH	127; 135	EM; EM	ME; ME	Oxidation of M (14)		Oxidation of M (14: Very Confident)	2	2	100	Doubtful
94	P02768-1 SWISS-PROT:P02768-1 Tax_Id=9606 Gene_Symbol=ALB Isoform 1 of Serum albumin precursor	P02768-1 SWISS-PROT:P02768-1 Tax_Id=9606 Gene_Symbol=ALB Isoform 1 of Serum albumin precursor (Doubtful)	1	1	RHPDYSVVLLLR	NH2-RHPDYSVVLLLR-COOH	361	AR	LA				6	6	100	Doubtful
95	GEPV01024489.1|:65-1015(+)	GEPV01024489.1|:65-1015(+) (Doubtful)	1	1	DRQFTGITSIK	NH2-DRQFTGITSIK-COOH	62	YR	CS				1	5	99.3631	Doubtful
96	GEPV01033026.1|:385-1125(-)	GEPV01033026.1|:385-1125(-) (Doubtful)	1	1	MFALVWAR	NH2-M<ox>FALVWAR-COOH	228	DK	NV	Oxidation of M (1)		Oxidation of M (1: Very Confident)	1	1	100	Doubtful
97	GEPV01033441.1|:40-798(-); GEPV01033442.1|:40-822(-)	GEPV01033441.1|:40-798(-), GEPV01033442.1|:40-822(-) (Doubtful)	1	1	FLVEQFDLK	NH2-FLVEQFDLK-COOH	209; 217	AR; AR	GT; GT				39	39	100	Doubtful
98	GEPV01033441.1|:40-798(-); GEPV01033442.1|:40-822(-)	GEPV01033441.1|:40-798(-), GEPV01033442.1|:40-822(-) (Doubtful)	1	1	KDIQEQANYFR	NH2-KDIQEQANYFR-COOH	110; 118	IA; IA	CV; CV				2	2	100	Doubtful
99	P02768-1 SWISS-PROT:P02768-1 Tax_Id=9606 Gene_Symbol=ALB Isoform 1 of Serum albumin precursor	P02768-1 SWISS-PROT:P02768-1 Tax_Id=9606 Gene_Symbol=ALB Isoform 1 of Serum albumin precursor (Doubtful)	1	1	LVAASQAALGL	NH2-LVAASQAALGL-COOH	599	KK					3	3	100	Doubtful
100	GEPV01022888.1|:941-1474(-); GEPV01022889.1|:900-1433(-)	GEPV01022888.1|:941-1474(-), GEPV01022889.1|:900-1433(-) (Doubtful)	1	1	DHPVVQGVATVVR	NH2-DHPVVQGVATVVR-COOH	101; 101	TK; TK	PV; PV				1	1	100	Doubtful
101	P00761 SWISS-PROT:P00761|TRYP_PIG Trypsin - Sus scrofa (Pig).	P00761 SWISS-PROT:P00761|TRYP_PIG Trypsin - Sus scrofa (Pig). (Doubtful)	1	1	TLDNDIMLIK	NH2-TLDNDIM<ox>LIK-COOH	88	GN	LS	Oxidation of M (7)		Oxidation of M (7: Very Confident)	2	2	33.3333	Doubtful
102	P02768-1 SWISS-PROT:P02768-1 Tax_Id=9606 Gene_Symbol=ALB Isoform 1 of Serum albumin precursor	P02768-1 SWISS-PROT:P02768-1 Tax_Id=9606 Gene_Symbol=ALB Isoform 1 of Serum albumin precursor (Doubtful)	1	1	HPDYSVVLLLR	NH2-HPDYSVVLLLR-COOH	362	RR	LA				2	2	100	Doubtful
103	GEPV01033441.1|:40-798(-); GEPV01033442.1|:40-822(-)	GEPV01033441.1|:40-798(-), GEPV01033442.1|:40-822(-) (Doubtful)	1	1	MANTIVGPDDFGLYE	NH2-MANTIVGPDDFGLYE-COOH	238; 246	LL; LL					6	6	100	Doubtful
104	P02768-1 SWISS-PROT:P02768-1 Tax_Id=9606 Gene_Symbol=ALB Isoform 1 of Serum albumin precursor; P02769 SWISS-PROT:P02769 (Bos taurus) Bovine serum albumin precursor	P02768-1 SWISS-PROT:P02768-1 Tax_Id=9606 Gene_Symbol=ALB Isoform 1 of Serum albumin precursor (Doubtful); P02769 SWISS-PROT:P02769 (Bos taurus) Bovine serum albumin precursor (Not Validated)	1	0	KVPQVSTPTLVEVSR	NH2-KVPQVSTPTLVEVSR-COOH	438; 437	TK; TR	NL; SL				7	7	100	Doubtful
105	GEPV01033441.1|:40-798(-); GEPV01033442.1|:40-822(-)	GEPV01033441.1|:40-798(-), GEPV01033442.1|:40-822(-) (Doubtful)	1	1	VMALLMANTIVGPDDFGLYE	NH2-VMALLM<ox>ANTIVGPDDFGLYE-COOH	233; 241	ER; ER		Oxidation of M (6)		Oxidation of M (6: Very Confident)	1	1	100	Doubtful
106	GEPV01033441.1|:40-798(-); GEPV01033442.1|:40-822(-)	GEPV01033441.1|:40-798(-), GEPV01033442.1|:40-822(-) (Doubtful)	1	1	VMALLMANTIVGPDDFGLYE	NH2-VM<ox>ALLMANTIVGPDDFGLYE-COOH	233; 241	ER; ER		Oxidation of M (2)		Oxidation of M (2: Very Confident)	10	10	100	Doubtful
107	P00761 SWISS-PROT:P00761|TRYP_PIG Trypsin - Sus scrofa (Pig).	P00761 SWISS-PROT:P00761|TRYP_PIG Trypsin - Sus scrofa (Pig). (Doubtful)	1	1	NIDVLEGNEQFINAAK	NH2-NIDVLEGNEQFINAAK-COOH	62	EH	II				3	3	100	Doubtful
108	GEPV01033441.1|:40-798(-); GEPV01033442.1|:40-822(-)	GEPV01033441.1|:40-798(-), GEPV01033442.1|:40-822(-) (Doubtful)	1	1	DIQEQANYFR	NH2-DIQEQANYFR-COOH	111; 119	AK; AK	CV; CV				20	21	100	Doubtful
109	GEPV01033441.1|:40-798(-); GEPV01033442.1|:40-822(-)	GEPV01033441.1|:40-798(-), GEPV01033442.1|:40-822(-) (Doubtful)	1	1	VMALLMANTIVGPDDFGLYE	NH2-VMALLMANTIVGPDDFGLYE-COOH	233; 241	ER; ER					12	13	100	Doubtful
110	GEPV01033441.1|:40-798(-); GEPV01033442.1|:40-822(-)	GEPV01033441.1|:40-798(-), GEPV01033442.1|:40-822(-) (Doubtful)	1	1	LDFLANDR	NH2-LDFLANDR-COOH	223; 231	GR; GR	ER; ER				21	22	100	Doubtful
111	GEPV01019573.1|:100-606(+); GEPV01054297.1|:44-571(-)	GEPV01019573.1|:100-606(+) (Doubtful)	1	1	LTNEGIQYLR	NH2-LTNEGIQYLR-COOH	69; 83	WR; WY	DF; EY				3	3	100	Doubtful
112	GEPV01033441.1|:40-798(-); GEPV01033442.1|:40-822(-)	GEPV01033441.1|:40-798(-), GEPV01033442.1|:40-822(-) (Doubtful)	1	1	SNNELDLTSMTAHVNR	NH2-SNNELDLTSM<ox>TAHVNR-COOH	131; 139	TD; TD	ME; ME	Oxidation of M (10)		Oxidation of M (10: Very Confident)	1	1	100	Doubtful
113	GEPV01033441.1|:40-798(-); GEPV01033442.1|:40-822(-)	GEPV01033441.1|:40-798(-), GEPV01033442.1|:40-822(-) (Doubtful)	1	1	MANTIVGPDDFGLYE	NH2-M<ox>ANTIVGPDDFGLYE-COOH	238; 246	LL; LL		Oxidation of M (1)		Oxidation of M (1: Very Confident)	10	10	100	Doubtful
114	GEPV01033441.1|:40-798(-); GEPV01033442.1|:40-822(-)	GEPV01033441.1|:40-798(-), GEPV01033442.1|:40-822(-) (Doubtful)	1	1	MEVVASLK	NH2-MEVVASLK-COOH	147; 155	NR; NR	KD; KD				14	14	100	Doubtful
115	GEPV01029747.1|:134-1438(-)	GEPV01029747.1|:134-1438(-) (Doubtful)	1	1	YPDHQPMGFPLDR	NH2-YPDHQPMGFPLDR-COOH	397	EK	RI				6	6	100	Doubtful
116	GEPV01033441.1|:40-798(-); GEPV01033442.1|:40-822(-)	GEPV01033441.1|:40-798(-), GEPV01033442.1|:40-822(-) (Doubtful)	1	1	CVMTEMGITDSNNELDLTSMTAHVNR	NH2-C<cmm>VMTEM<ox>GITDSNNELDLTSM<ox>TAHVNR-COOH	121; 129	FR; FR	ME; ME	Oxidation of M (20, 6)	Carbamidomethylation of C (1)	Oxidation of M (6: Very Confident, 20: Very Confident)	1	1	100	Doubtful
117	GEPV01033441.1|:40-798(-); GEPV01033442.1|:40-822(-)	GEPV01033441.1|:40-798(-), GEPV01033442.1|:40-822(-) (Doubtful)	1	1	CVMTEMGITDSNNELDLTSMTAHVNR	NH2-C<cmm>VM<ox>TEMGITDSNNELDLTSM<ox>TAHVNR-COOH	121; 129	FR; FR	ME; ME	Oxidation of M (20, 3)	Carbamidomethylation of C (1)	Oxidation of M (3: Random, 20: Very Confident)	1	1	100	Doubtful
118	GEPV01033026.1|:385-1125(-)	GEPV01033026.1|:385-1125(-) (Doubtful)	1	1	GAQTYFTEDTVR	NH2-GAQTYFTEDTVR-COOH	90	GK	YL				1	1	100	Doubtful
119	P02768-1 SWISS-PROT:P02768-1 Tax_Id=9606 Gene_Symbol=ALB Isoform 1 of Serum albumin precursor	P02768-1 SWISS-PROT:P02768-1 Tax_Id=9606 Gene_Symbol=ALB Isoform 1 of Serum albumin precursor (Doubtful)	1	1	AVMDDFAAFVEK	NH2-AVMDDFAAFVEK-COOH	570	LK	CC				3	3	100	Doubtful
120	P00761 SWISS-PROT:P00761|TRYP_PIG Trypsin - Sus scrofa (Pig).; P07477 SWISS-PROT:P07477 Tax_Id=9606 Gene_Symbol=PRSS1 Trypsin-1 precursor	P00761 SWISS-PROT:P00761|TRYP_PIG Trypsin - Sus scrofa (Pig). (Doubtful); P07477 SWISS-PROT:P07477 Tax_Id=9606 Gene_Symbol=PRSS1 Trypsin-1 precursor (Doubtful)	2	0	VLEGNEQFINAAK	NH2-VLEGNEQFINAAK-COOH	65; 80	ID; IE	II; II				1	1	40	Doubtful
121	GEPV01033441.1|:40-798(-); GEPV01033442.1|:40-822(-)	GEPV01033441.1|:40-798(-), GEPV01033442.1|:40-822(-) (Doubtful)	1	1	SNNELDLTSMTAHVNR	NH2-SNNELDLTSMTAHVNR-COOH	131; 139	TD; TD	ME; ME				6	6	100	Doubtful
122	GEPV01030431.1|:92-565(+)	GEPV01030431.1|:92-565(+) (Doubtful)	1	1	LEAPGQVNPQQQTQIILR	NH2-LEAPGQVNPQQQTQIILR-COOH	51	YR	GA				6	6	100	Doubtful
123	P07477 SWISS-PROT:P07477 Tax_Id=9606 Gene_Symbol=PRSS1 Trypsin-1 precursor	P07477 SWISS-PROT:P07477 Tax_Id=9606 Gene_Symbol=PRSS1 Trypsin-1 precursor (Doubtful)	1	1	LGEHNIEVLEGNEQFINAAK	NH2-LGEHNIEVLEGNEQFINAAK-COOH	73	VR	II				3	6	100	Doubtful
124	GEPV01030431.1|:92-565(+)	GEPV01030431.1|:92-565(+) (Doubtful)	1	1	ALNPTGSSGGGYFNQGVNSK	NH2-ALNPTGSSGGGYFNQGVNSK-COOH	79	VR	AL				3	4	100	Doubtful
125	GEPV01054001.1|:212-940(+)	GEPV01054001.1|:212-940(+) (Doubtful)	1	1	TGGNHGDFDADMAHYLEEK	NH2-TGGNHGDFDADMAHYLEEK-COOH	187	KR	IE				3	3	100	Doubtful
126	GEPV01043152.1|:118-1254(+); GEPV01043155.1|:3-1661(+)	GEPV01043152.1|:118-1254(+), GEPV01043155.1|:3-1661(+) (Doubtful); GEPV01043155.1|:3-1661(+) (Not Validated)	1	0	AAAAKEAEASSR	NH2-AAAAKEAEASSR-COOH	123; 297	KK; KK	RK; RK				2	3	99.3464	Doubtful
127	GEPV01033441.1|:40-798(-); GEPV01033442.1|:40-822(-)	GEPV01033441.1|:40-798(-), GEPV01033442.1|:40-822(-) (Doubtful)	1	1	SMTAHVNR	NH2-SMTAHVNR-COOH	139; 147	LT; LT	ME; ME				1	1	100	Doubtful
128	P02768-1 SWISS-PROT:P02768-1 Tax_Id=9606 Gene_Symbol=ALB Isoform 1 of Serum albumin precursor	P02768-1 SWISS-PROT:P02768-1 Tax_Id=9606 Gene_Symbol=ALB Isoform 1 of Serum albumin precursor (Doubtful)	1	1	VFDEFKPLVEEPQNLIK	NH2-VFDEFKPLVEEPQNLIK-COOH	397	AK	QN				6	6	100	Doubtful
129	GEPV01033441.1|:40-798(-); GEPV01033442.1|:40-822(-)	GEPV01033441.1|:40-798(-), GEPV01033442.1|:40-822(-) (Doubtful)	1	1	CVMTEMGITDSNNELDLTSMTAHVNR	NH2-C<cmm>VM<ox>TEM<ox>GITDSNNELDLTSMTAHVNR-COOH	121; 129	FR; FR	ME; ME	Oxidation of M (6, 3)	Carbamidomethylation of C (1)	Oxidation of M (3: Very Confident, 6: Very Confident)	5	5	100	Doubtful
130	GEPV01036921.1|:1-444(+)	GEPV01036921.1|:1-444(+) (Doubtful)	1	1	ELLISMGDR	NH2-ELLISMGDR-COOH	100	LR	FT				3	3	100	Doubtful
131	GEPV01000391.1|:34-429(-); GEPV01000392.1|:34-429(-)	GEPV01000391.1|:34-429(-), GEPV01000392.1|:34-429(-) (Doubtful)	1	1	YYTLVTYVPVATFK	NH2-YYTLVTYVPVATFK-COOH	105; 105	HK; HK	GL; GL				1	1	100	Doubtful
132	P02768-1 SWISS-PROT:P02768-1 Tax_Id=9606 Gene_Symbol=ALB Isoform 1 of Serum albumin precursor	P02768-1 SWISS-PROT:P02768-1 Tax_Id=9606 Gene_Symbol=ALB Isoform 1 of Serum albumin precursor (Doubtful)	1	1	RHPYFYAPELLFFAK	NH2-RHPYFYAPELLFFAK-COOH	169	AR	RY				9	9	100	Doubtful
133	GEPV01033441.1|:40-798(-); GEPV01033442.1|:40-822(-)	GEPV01033441.1|:40-798(-), GEPV01033442.1|:40-822(-) (Doubtful)	1	1	VMTEMGITDSNNELDLTSMTAHVNR	NH2-VMTEMGITDSNNELDLTSMTAHVNR-COOH	122; 130	RC; RC	ME; ME				3	3	100	Doubtful
134	GEPV01016044.1|:99-557(+)	GEPV01016044.1|:99-557(+) (Doubtful)	1	1	YSQILSNNLETK	NH2-YSQILSNNLETK-COOH	95	GK	LR				3	3	100	Doubtful
135	GEPV01033441.1|:40-798(-); GEPV01033442.1|:40-822(-)	GEPV01033441.1|:40-798(-), GEPV01033442.1|:40-822(-) (Doubtful)	1	1	LTSMTAHVNR	NH2-LTSMTAHVNR-COOH	137; 145	LD; LD	ME; ME				1	1	100	Doubtful
136	GEPV01033441.1|:40-798(-); GEPV01033442.1|:40-822(-)	GEPV01033441.1|:40-798(-), GEPV01033442.1|:40-822(-) (Doubtful)	1	1	DAYPLPADVVTTQHYLF	NH2-DAYPLPADVVTTQHYLF-COOH	176; 184	NK; NK	CE; CE				9	9	100	Doubtful
137	GEPV01036921.1|:1-444(+)	GEPV01036921.1|:1-444(+) (Doubtful)	1	1	FTDEDVDEMYR	NH2-FTDEDVDEMYR-COOH	109	DR	EA				3	3	100	Doubtful
138	GEPV01022888.1|:941-1474(-); GEPV01022889.1|:900-1433(-)	GEPV01022888.1|:941-1474(-), GEPV01022889.1|:900-1433(-) (Doubtful)	1	1	QMYETASSGVQAADR	pyro-QMYETASSGVQAADR-COOH	133; 133	FR; FR	QV; QV	Pyrolidone from Q (1)			2	2	100	Doubtful
139	GEPV01022888.1|:941-1474(-); GEPV01022889.1|:900-1433(-)	GEPV01022888.1|:941-1474(-), GEPV01022889.1|:900-1433(-) (Doubtful)	1	1	FITQTDHDEQQLSQLNEEGGR	NH2-FITQTDHDEQQLSQLNEEGGR-COOH	33; 33	SP; SP	GW; GW				3	3	100	Doubtful
140	P00761 SWISS-PROT:P00761|TRYP_PIG Trypsin - Sus scrofa (Pig).; P07477 SWISS-PROT:P07477 Tax_Id=9606 Gene_Symbol=PRSS1 Trypsin-1 precursor	P00761 SWISS-PROT:P00761|TRYP_PIG Trypsin - Sus scrofa (Pig). (Doubtful); P07477 SWISS-PROT:P07477 Tax_Id=9606 Gene_Symbol=PRSS1 Trypsin-1 precursor (Doubtful)	2	0	NKPGVYTK	NH2-NKPGVYTK-COOH	209; 224	QK; QK	VC; VY				2	3	100	Doubtful
141	GEPV01022888.1|:941-1474(-); GEPV01022889.1|:900-1433(-)	GEPV01022888.1|:941-1474(-), GEPV01022889.1|:900-1433(-) (Doubtful)	1	1	GWQSWDALR	NH2-GWQSWDALR-COOH	54; 54	GR; GR	NW; NW				3	3	100	Doubtful
142	GEPV01042675.1|:2-5101(-)	GEPV01042675.1|:2-5101(-) (Doubtful)	1	1	VPLGGYTNPESSK	NH2-VPLGGYTNPESSK-COOH	193	QR	TT				3	3	100	Doubtful
143	P02768-1 SWISS-PROT:P02768-1 Tax_Id=9606 Gene_Symbol=ALB Isoform 1 of Serum albumin precursor	P02768-1 SWISS-PROT:P02768-1 Tax_Id=9606 Gene_Symbol=ALB Isoform 1 of Serum albumin precursor (Doubtful)	1	1	DDNPNLPR	NH2-DDNPNLPR-COOH	131	HK	LV				2	2	100	Doubtful
144	GEPV01042922.1|:66-3989(+)	GEPV01042922.1|:66-3989(+) (Doubtful)	1	1	TGVVTADQAEK	NH2-TGVVTADQAEK-COOH	146	QR	AL				1	1	100	Doubtful
145	GEPV01027880.1|:366-1538(-)	GEPV01027880.1|:366-1538(-) (Not Validated)	0	1	VPLSSLPR	NH2-VPLSSLPR-COOH	228	KK	PV				0	6	40	Doubtful
146	GEPV01037052.1|:1-5142(+)	GEPV01037052.1|:1-5142(+) (Doubtful)	1	1	LIMRFDDTNPAKEDAHFESVILEDLK	NH2-LIMRFDDTNPAKEDAHFESVILEDLK-COOH	180	GK	LL				3	6	99.3711	Doubtful
147	P00761 SWISS-PROT:P00761|TRYP_PIG Trypsin - Sus scrofa (Pig).	P00761 SWISS-PROT:P00761|TRYP_PIG Trypsin - Sus scrofa (Pig). (Doubtful)	1	1	YVNWIQQTIAAN	NH2-YVNWIQQTIAAN-COOH	220	CN					3	3	99.3548	Doubtful
148	P00761 SWISS-PROT:P00761|TRYP_PIG Trypsin - Sus scrofa (Pig).	P00761 SWISS-PROT:P00761|TRYP_PIG Trypsin - Sus scrofa (Pig). (Doubtful)	1	1	IDVLEGNEQFINAAK	NH2-IDVLEGNEQFINAAK-COOH	63	HN	II				2	2	100	Doubtful
149	GEPV01019573.1|:100-606(+)	GEPV01019573.1|:100-606(+) (Doubtful)	1	1	RGPAAPGALDK	NH2-RGPAAPGALDK-COOH	135	YR	AA				1	1	100	Doubtful
150	P00761 SWISS-PROT:P00761|TRYP_PIG Trypsin - Sus scrofa (Pig).	P00761 SWISS-PROT:P00761|TRYP_PIG Trypsin - Sus scrofa (Pig). (Doubtful)	1	1	IITHPNFNGNTLDNDIMLIK	NH2-IITHPNFNGNTLDNDIM<ox>LIK-COOH	78	AK	LS	Oxidation of M (17)		Oxidation of M (17: Very Confident)	37	37	100	Doubtful
151	GEPV01030431.1|:92-565(+)	GEPV01030431.1|:92-565(+) (Doubtful)	1	1	TEVILQWTAPSQPGVYTVK	NH2-TEVILQWTAPSQPGVYTVK-COOH	118	DK	AT				4	4	100	Doubtful
152	GEPV01033441.1|:40-798(-); GEPV01033442.1|:40-822(-)	GEPV01033441.1|:40-798(-), GEPV01033442.1|:40-822(-) (Doubtful)	1	1	CVMTEMGITDSNNELDLTSMTAHVNR	NH2-C<cmm>VM<ox>TEM<ox>GITDSNNELDLTSM<ox>TAHVNR-COOH	121; 129	FR; FR	ME; ME	Oxidation of M (20, 6, 3)	Carbamidomethylation of C (1)	Oxidation of M (3: Very Confident, 6: Very Confident, 20: Very Confident)	3	3	100	Doubtful
153	GEPV01054001.1|:212-940(+)	GEPV01054001.1|:212-940(+) (Doubtful)	1	1	TTVVQVNDLHR	NH2-TTVVQVNDLHR-COOH	171	CK	MS				3	3	100	Doubtful
154	P02768-1 SWISS-PROT:P02768-1 Tax_Id=9606 Gene_Symbol=ALB Isoform 1 of Serum albumin precursor	P02768-1 SWISS-PROT:P02768-1 Tax_Id=9606 Gene_Symbol=ALB Isoform 1 of Serum albumin precursor (Doubtful)	1	1	FYAPELLFFAK	NH2-FYAPELLFFAK-COOH	173	PY	RY				3	3	100	Doubtful
155	GEPV01033441.1|:40-798(-); GEPV01033442.1|:40-822(-)	GEPV01033441.1|:40-798(-), GEPV01033442.1|:40-822(-) (Doubtful)	1	1	PSNVVSDIAK	NH2-PSNVVSDIAK-COOH	101; 109	RY; RY	DI; DI				4	4	100	Doubtful
156	GEPV01033441.1|:40-798(-); GEPV01033442.1|:40-822(-)	GEPV01033441.1|:40-798(-), GEPV01033442.1|:40-822(-) (Doubtful)	1	1	DAYPLPADVVTTQHYL	NH2-DAYPLPADVVTTQHYL-COOH	176; 184	NK; NK	FC; FC				3	3	100	Doubtful
157	GEPV01033441.1|:40-798(-); GEPV01033442.1|:40-822(-)	GEPV01033441.1|:40-798(-), GEPV01033442.1|:40-822(-) (Doubtful)	1	1	CVMTEMGITDSNNELDLTSMTAH	NH2-C<cmm>VM<ox>TEM<ox>GITDSNNELDLTSMTAH-COOH	121; 129	FR; FR	VN; VN	Oxidation of M (6, 3)	Carbamidomethylation of C (1)	Oxidation of M (3: Random, 6: Very Confident)	1	2	100	Doubtful
158	GEPV01022888.1|:941-1474(-); GEPV01022889.1|:900-1433(-)	GEPV01022888.1|:941-1474(-), GEPV01022889.1|:900-1433(-) (Doubtful)	1	1	RDGEPLQQYSVPQAENIEILH	NH2-RDGEPLQQYSVPQAENIEILH-COOH	157; 157	NR; NR					1	1	100	Doubtful
159	P02768-1 SWISS-PROT:P02768-1 Tax_Id=9606 Gene_Symbol=ALB Isoform 1 of Serum albumin precursor	P02768-1 SWISS-PROT:P02768-1 Tax_Id=9606 Gene_Symbol=ALB Isoform 1 of Serum albumin precursor (Doubtful)	1	1	FKDLGEENFK	NH2-FKDLGEENFK-COOH	35	HR	AL				3	3	100	Doubtful
