# Supplementary material for: The level of putative carotenoid-binding proteins determines the body color in two species of endemic Lake Baikal amphipods
Source: PeerJ. 2020 Jun 19;8:e9387. doi: 10.7717/peerj.9387 (PMC7307558; doi:10.7717/peerj.9387)
Supplement: Supplemental Information 9 — The protein sequences were used as a query against the NCBI non-redundant protein database. The analysis was run through the NCBI blast web interface on April 03, 2020. [file peerj-08-9387-s009.xlsx]

## Sheet: Ecy_25kDa
Query accession	Subject accession	Description	% identity	Alignment length	Mismatches	Gap opens	Query start	Query end	Subject start	Subject end	Evalue	bit score	% positives
GEPS01030296.1|:56-799(+)	KAF2359082.1	hypothetical protein FHG87_010164 [Trinorchestia longiramus]	52.016	248	117	2	1	247	1	247	4.14e-91	278	70.56
GEPS01030296.1|:56-799(+)	KAF2359081.1	hypothetical protein FHG87_010163 [Trinorchestia longiramus]	51.613	248	118	2	1	247	1	247	2.77e-90	276	70.56
GEPS01030296.1|:56-799(+)	XP_018017053.1	PREDICTED: uncharacterized protein LOC108673699 [Hyalella azteca]	54.032	248	112	2	1	247	1	247	1.22e-87	270	71.37
GEPS01030296.1|:56-799(+)	KAF2354759.1	hypothetical protein FHG87_014485 [Trinorchestia longiramus]	53.778	225	103	1	24	247	60	284	4.38e-85	264	70.22
GEPS01030296.1|:56-799(+)	XP_018016986.1	PREDICTED: uncharacterized protein LOC108673640 [Hyalella azteca]	63.946	147	53	0	101	247	2	148	1.1e-65	210	80.95
GEPS01030296.1|:56-799(+)	KAF2366110.1	Pheromone/general odorant binding protein [Trinorchestia longiramus]	34.247	219	142	2	20	237	68	285	4.07e-40	155	56.62
GEPS01030296.1|:56-799(+)	XP_018023718.1	PREDICTED: uncharacterized protein LOC108679577 [Hyalella azteca]	30.263	228	158	1	10	236	3	230	2.25e-33	130	50.88
GEPS01030296.1|:56-799(+)	KAF2367532.1	hypothetical protein FHG87_001701 [Trinorchestia longiramus]	31.496	254	143	7	3	235	5	248	8.38e-31	124	49.21
GEPS01030296.1|:56-799(+)	XP_018008858.1	PREDICTED: uncharacterized protein LOC108666483 [Hyalella azteca]	29.333	225	159	0	11	235	4	228	6.47e-30	121	48
GEPS01030296.1|:56-799(+)	XP_018017061.1	PREDICTED: uncharacterized protein LOC108673705 [Hyalella azteca]	34.359	195	123	4	42	235	2	192	1.3e-29	120	53.85
GEPS01030296.1|:56-799(+)	XP_018008817.1	PREDICTED: uncharacterized protein LOC108666451 [Hyalella azteca]	26.766	269	164	5	7	245	1	266	5.75e-22	101	43.87
GEPS01030296.1|:56-799(+)	PSN39312.1	hypothetical protein C0J52_15573 [Blattella germanica]	24.8	250	146	8	27	240	31	274	1.02e-13	80.1	43.6
GEPS01030296.1|:56-799(+)	XP_018017056.1	PREDICTED: uncharacterized protein LOC108673703 [Hyalella azteca]	25.909	220	132	6	35	239	31	234	5.57e-13	77	47.73
GEPS01030296.1|:56-799(+)	XP_018015874.1	PREDICTED: uncharacterized protein LOC108672678 [Hyalella azteca]	28.402	169	103	4	86	239	23	188	8.14e-13	75.9	52.07
GEPS01030296.1|:56-799(+)	XP_027211893.1	uncharacterized protein LOC113805142 [Penaeus vannamei]	31.818	154	94	5	96	245	129	275	1.29e-12	76.6	52.6
GEPS01030296.1|:56-799(+)	XP_027211774.1	uncharacterized protein LOC113805061 [Penaeus vannamei]	23.308	266	165	8	6	245	1	253	4.29e-12	74.7	41.35
GEPS01030296.1|:56-799(+)	XP_027235628.1	uncharacterized protein LOC113826930 [Penaeus vannamei]	24.312	218	148	4	6	210	1	214	1.73e-11	72.8	44.5
GEPS01030296.1|:56-799(+)	XP_017777220.1	PREDICTED: uncharacterized protein LOC108563138 [Nicrophorus...	30.769	104	71	1	104	207	227	329	7.23e-11	72.8	55.77
GEPS01030296.1|:56-799(+)	ROT61328.1	hypothetical protein C7M84_020904 [Penaeus vannamei]	24.312	218	148	4	6	210	1	214	1.48e-10	72	44.5
GEPS01030296.1|:56-799(+)	XP_022914468.1	uncharacterized protein LOC111424959 [Onthophagus taurus]	32.381	105	69	2	104	207	193	296	2.37e-10	70.9	57.14
GEPS01030296.1|:56-799(+)	XP_021934352.1	uncharacterized protein LOC110836930 [Zootermopsis nevadensis]	32.381	105	69	2	104	207	18	121	2.57e-10	68.2	56.19
GEPS01030296.1|:56-799(+)	XP_027211763.1	uncharacterized protein LOC113805051 [Penaeus vannamei]	24.862	181	125	4	68	241	99	275	2.76e-10	70.1	46.96
GEPS01030296.1|:56-799(+)	PNF40311.1	hypothetical protein B7P43_G05789 [Cryptotermes secundus]	32.381	105	69	2	104	207	202	305	3.35e-10	70.5	57.14
GEPS01030296.1|:56-799(+)	ROT80771.1	hypothetical protein C7M84_000480 [Penaeus vannamei]	27.126	247	148	10	14	245	5	234	3.45e-10	69.3	42.91
GEPS01030296.1|:56-799(+)	XP_027211854.1	uncharacterized protein LOC113805126 [Penaeus vannamei]	23.451	226	138	6	6	206	1	216	3.51e-10	69.3	41.59
GEPS01030296.1|:56-799(+)	XP_023727809.1	uncharacterized protein LOC111875643 [Cryptotermes secundus]	32.381	105	69	2	104	207	202	305	4.11e-10	70.5	57.14
GEPS01030296.1|:56-799(+)	XP_027231531.1	uncharacterized protein LOC113823112 [Penaeus vannamei]	33.654	104	68	1	108	211	89	191	4.81e-10	68.6	53.85
GEPS01030296.1|:56-799(+)	XP_019877145.1	PREDICTED: uncharacterized protein LOC109605022 [Aethina tumida]	31.429	105	70	2	104	207	187	290	9.81e-10	69.3	57.14
GEPS01030296.1|:56-799(+)	KAF0304044.1	hypothetical protein FJT64_002827 [Amphibalanus amphitrite]	21.324	272	170	8	6	243	3	264	1.1e-09	68.2	40.44
GEPS01030296.1|:56-799(+)	KDR11629.1	hypothetical protein L798_13955 [Zootermopsis nevadensis]	32.381	105	69	2	104	207	202	305	1.34e-09	68.9	56.19
GEPS01030296.1|:56-799(+)	KAF0304043.1	hypothetical protein FJT64_002827 [Amphibalanus amphitrite]	21.402	271	169	8	7	243	1	261	2.12e-09	67.4	40.22
GEPS01030296.1|:56-799(+)	VEN60864.1	unnamed protein product [Callosobruchus maculatus]	27.465	142	89	4	91	222	131	268	2.2e-09	67.8	50.7
GEPS01030296.1|:56-799(+)	XP_018008854.1	PREDICTED: uncharacterized protein LOC108666479 [Hyalella azteca]	27.064	218	140	9	31	235	23	234	4.75e-09	66.2	46.33
GEPS01030296.1|:56-799(+)	XP_018017062.1	PREDICTED: uncharacterized protein LOC108673706 [Hyalella azteca]	26.667	255	158	9	10	245	6	250	5.09e-09	66.2	41.57
GEPS01030296.1|:56-799(+)	XP_030765405.1	uncharacterized protein LOC115889522 [Sitophilus oryzae]	28.571	119	79	3	101	214	197	314	5.14e-09	67	53.78
GEPS01030296.1|:56-799(+)	EFX77118.1	hypothetical protein DAPPUDRAFT_305875 [Daphnia pulex]	31.193	109	73	2	100	207	219	326	1.04e-08	66.2	54.13
GEPS01030296.1|:56-799(+)	XP_028145914.1	uncharacterized protein LOC114339451 [Diabrotica virgifera...	25.581	129	94	2	80	207	168	295	1.71e-08	65.5	52.71
GEPS01030296.1|:56-799(+)	TRY62675.1	hypothetical protein TCAL_12792 [Tigriopus californicus]	33.028	109	63	3	104	207	198	301	1.85e-08	65.5	55.96
GEPS01030296.1|:56-799(+)	XP_025830589.1	uncharacterized protein LOC108741139 [Agrilus planipennis]	29.524	105	72	2	104	207	186	289	2.19e-08	65.1	60
GEPS01030296.1|:56-799(+)	RZC32779.1	uncharacterized protein BDFB_007256 [Asbolus verrucosus]	29.524	105	72	2	104	207	178	281	3.02e-08	64.7	57.14
GEPS01030296.1|:56-799(+)	KAF2359079.1	Pheromone/general odorant binding protein [Trinorchestia...	27.451	153	105	3	90	239	10	159	3.37e-08	62.4	48.37
GEPS01030296.1|:56-799(+)	KAF0304042.1	hypothetical protein FJT64_002826 [Amphibalanus amphitrite]	22.097	267	166	8	13	245	5	263	3.79e-08	63.9	39.33
GEPS01030296.1|:56-799(+)	XP_019756138.1	PREDICTED: uncharacterized protein LOC109534792 isoform X1...	26.852	108	77	2	101	207	215	321	3.79e-08	64.7	54.63
GEPS01030296.1|:56-799(+)	XP_022122942.1	uncharacterized protein LOC110998550 [Pieris rapae]	28.859	149	88	4	110	247	218	359	3.79e-08	64.7	48.32
GEPS01030296.1|:56-799(+)	XP_019756139.1	PREDICTED: uncharacterized protein LOC109534792 isoform X2...	26.852	108	77	2	101	207	197	303	4.15e-08	64.3	54.63
GEPS01030296.1|:56-799(+)	KAF2894058.1	hypothetical protein ILUMI_12119 [Ignelater luminosus]	24	175	126	5	35	207	75	244	5.43e-08	63.9	47.43
GEPS01030296.1|:56-799(+)	XP_026748428.1	uncharacterized protein LOC113509309 [Galleria mellonella]	29	100	67	3	110	207	17	114	5.76e-08	60.8	55
GEPS01030296.1|:56-799(+)	XP_023934395.1	uncharacterized protein LOC112043295 [Bicyclus anynana]	29.371	143	94	5	84	221	204	344	7.38e-08	63.9	50.35
GEPS01030296.1|:56-799(+)	KAB7506053.1	hypothetical protein Anas_00172 [Armadillidium nasatum]	26.389	144	104	1	87	228	65	208	8.39e-08	62.4	46.53
GEPS01030296.1|:56-799(+)	XP_025192746.1	uncharacterized protein LOC112592796 isoform X2 [Melanaphis...	29.73	111	76	2	104	214	259	367	8.54e-08	63.5	56.76
GEPS01030296.1|:56-799(+)	XP_025192734.1	uncharacterized protein LOC112592796 isoform X1 [Melanaphis...	29.73	111	76	2	104	214	260	368	8.55e-08	63.5	56.76
GEPS01030296.1|:56-799(+)	XP_014261933.1	uncharacterized protein LOC106674017 [Cimex lectularius]	29.808	104	71	2	104	207	240	341	1.06e-07	63.5	55.77
GEPS01030296.1|:56-799(+)	GBP26111.1	hypothetical protein EVAR_15125_1 [Eumeta japonica]	33.333	96	60	3	114	207	273	366	1.43e-07	63.2	56.25
GEPS01030296.1|:56-799(+)	XP_015366227.1	PREDICTED: uncharacterized protein LOC107163361 isoform X2...	29.73	111	76	2	104	214	260	368	1.47e-07	63.2	55.86
GEPS01030296.1|:56-799(+)	XP_001943087.1	uncharacterized protein LOC100166240 [Acyrthosiphon pisum]	30.769	104	70	2	104	207	211	312	1.51e-07	62.8	57.69
GEPS01030296.1|:56-799(+)	XP_015366226.1	PREDICTED: uncharacterized protein LOC107163361 isoform X1...	29.73	111	76	2	104	214	261	369	1.52e-07	63.2	55.86
GEPS01030296.1|:56-799(+)	VVC43406.1	Pheromone/general odorant binding protein [Cinara cedri]	28.571	126	86	3	82	207	246	367	1.53e-07	63.2	53.97
GEPS01030296.1|:56-799(+)	XP_027853063.1	uncharacterized protein LOC114131918 [Aphis gossypii]	30.769	104	70	2	104	207	262	363	1.65e-07	62.8	57.69
GEPS01030296.1|:56-799(+)	KAF0765727.1	Uncharacterized protein FWK35_00011987 [Aphis craccivora]	30.769	104	70	2	104	207	262	363	1.65e-07	62.8	57.69
GEPS01030296.1|:56-799(+)	KAE9544914.1	hypothetical protein AGLY_000457 [Aphis glycines]	30.769	104	70	2	104	207	262	363	1.67e-07	62.8	57.69
GEPS01030296.1|:56-799(+)	XP_026812905.1	uncharacterized protein LOC113553654 isoform X2 [Rhopalosiphum...	30.769	104	70	2	104	207	260	361	1.93e-07	62.8	57.69
GEPS01030296.1|:56-799(+)	RZF48774.1	hypothetical protein LSTR_LSTR008123 [Laodelphax striatellus]	30.769	104	70	2	104	207	328	429	1.95e-07	62.8	55.77
GEPS01030296.1|:56-799(+)	XP_026812904.1	uncharacterized protein LOC113553654 isoform X1 [Rhopalosiphum...	30.769	104	70	2	104	207	261	362	1.99e-07	62.8	57.69
GEPS01030296.1|:56-799(+)	XP_025408396.1	uncharacterized protein LOC112682116 [Sipha flava]	30.769	104	70	2	104	207	252	353	2.09e-07	62.4	57.69
GEPS01030296.1|:56-799(+)	XP_013168154.1	PREDICTED: uncharacterized protein LOC106118142 [Papilio xuthus]	31	100	65	3	110	207	239	336	2.14e-07	62.4	57
GEPS01030296.1|:56-799(+)	XP_018917579.1	PREDICTED: uncharacterized protein LOC109044341 [Bemisia tabaci]	28.571	126	80	3	104	221	309	432	2.16e-07	62.8	51.59
GEPS01030296.1|:56-799(+)	XP_013198945.1	PREDICTED: uncharacterized protein LOC106141854 [Amyelois...	30	100	66	3	110	207	92	189	2.37e-07	61.6	54
GEPS01030296.1|:56-799(+)	XP_013198945.1	hypothetical protein evm_008314 [Chilo suppressalis]	26.984	63	45	1	110	172	19	80	5.6	39.7	53.97
GEPS01030296.1|:56-799(+)	RVE47032.1	uncharacterized protein LOC111029697 isoform X2 [Myzus persicae]	30	100	66	3	110	207	219	316	2.6e-07	62	56
GEPS01030296.1|:56-799(+)	XP_022164510.1	uncharacterized protein LOC116933170 [Daphnia magna]	29.808	104	71	2	104	207	264	365	2.9e-07	62	57.69
GEPS01030296.1|:56-799(+)	XP_032796909.1	uncharacterized protein LOC111029697 isoform X1 [Myzus persicae]	34.653	101	60	3	110	207	261	358	3.03e-07	62	51.49
GEPS01030296.1|:56-799(+)	XP_022164506.1	hypothetical protein Avbf_07573 [Armadillidium vulgare]	29.808	104	71	2	104	207	265	366	3.1e-07	62	57.69
GEPS01030296.1|:56-799(+)	RXG58341.1	PREDICTED: uncharacterized protein LOC103313083 isoform X1...	26.812	138	99	1	93	228	33	170	3.12e-07	60.1	45.65
GEPS01030296.1|:56-799(+)	XP_008193633.1	PREDICTED: uncharacterized protein LOC103313083 isoform X2...	30.476	105	71	2	104	207	183	286	3.28e-07	61.6	54.29
GEPS01030296.1|:56-799(+)	XP_008193634.1	PREDICTED: uncharacterized protein LOC106707832 isoform X2...	26.389	144	98	3	71	207	140	282	3.42e-07	61.6	50
GEPS01030296.1|:56-799(+)	XP_014354760.1	PREDICTED: uncharacterized protein LOC106707832 isoform X1...	31	100	65	3	110	207	239	336	3.51e-07	62	56
GEPS01030296.1|:56-799(+)	XP_014354759.1	uncharacterized protein LOC106682016 isoform X2 [Halyomorpha...	31	100	65	3	110	207	239	336	3.57e-07	62	56
GEPS01030296.1|:56-799(+)	XP_014278128.1	uncharacterized protein LOC106682016 isoform X1 [Halyomorpha...	28.846	104	72	2	104	207	237	338	3.7e-07	61.6	55.77
GEPS01030296.1|:56-799(+)	XP_014278127.1	uncharacterized protein LOC116916719 [Daphnia magna]	28.846	104	72	2	104	207	238	339	3.82e-07	61.6	55.77
GEPS01030296.1|:56-799(+)	XP_032777940.1	Uncharacterized protein APZ42_018912 [Daphnia magna]	34.653	101	60	3	110	207	237	334	3.89e-07	61.6	51.49
GEPS01030296.1|:56-799(+)	KZS15702.1	PREDICTED: uncharacterized protein LOC105390439 [Plutella...	34.653	101	60	3	110	207	237	334	4.08e-07	61.6	51.49
GEPS01030296.1|:56-799(+)	XP_011560046.1	uncharacterized protein LOC113805073 [Penaeus vannamei]	28.283	99	69	2	110	207	230	327	4.14e-07	61.6	54.55
GEPS01030296.1|:56-799(+)	XP_027211786.1	uncharacterized protein LOC113232860 [Hyposmocoma kahamanoa]	23.034	178	116	4	68	241	7	167	4.36e-07	59.3	47.19
GEPS01030296.1|:56-799(+)	XP_026323502.1	hypothetical protein Phum_PHUM604920 [Pediculus humanus corporis]	29.825	114	75	4	111	221	226	337	4.55e-07	61.6	54.39
GEPS01030296.1|:56-799(+)	XP_002432927.1	uncharacterized protein LOC113392487 [Vanessa tameamea]	28.571	98	69	1	110	207	215	311	4.87e-07	61.2	54.08
GEPS01030296.1|:56-799(+)	XP_026484733.1	uncharacterized protein LOC116769333 isoform X1 [Danaus...	29	100	67	3	110	207	217	314	9.81e-07	60.5	55
GEPS01030296.1|:56-799(+)	XP_032516294.1	uncharacterized protein LOC116769333 isoform X2 [Danaus...	29	100	67	3	110	207	220	317	1.01e-06	60.5	54
GEPS01030296.1|:56-799(+)	XP_032516302.1	uncharacterized protein LOC111050194 isoform X2 [Nilaparvata...	29	100	67	3	110	207	220	317	1.1e-06	60.5	54
GEPS01030296.1|:56-799(+)	XP_022192171.1	uncharacterized protein LOC108910840 isoform X2 [Anoplophora...	29.808	104	71	2	104	207	346	447	1.11e-06	60.5	55.77
GEPS01030296.1|:56-799(+)	XP_018571112.1	uncharacterized protein LOC111050194 isoform X1 [Nilaparvata...	20.611	262	144	6	9	207	4	264	1.15e-06	60.1	36.64
GEPS01030296.1|:56-799(+)	XP_022192163.1	uncharacterized protein LOC114363305 isoform X2 [Ostrinia...	29.808	104	71	2	104	207	347	448	1.15e-06	60.5	55.77
GEPS01030296.1|:56-799(+)	XP_028174791.1	uncharacterized protein LOC114363305 isoform X1 [Ostrinia...	29.293	99	66	3	111	207	221	317	1.52e-06	60.1	55.56
GEPS01030296.1|:56-799(+)	XP_028174789.1	uncharacterized protein LOC116171435 [Photinus pyralis]	29.293	99	66	3	111	207	221	317	1.53e-06	60.1	55.56
GEPS01030296.1|:56-799(+)	XP_031344145.1	unnamed protein product [Leptidea sinapis]	24.545	110	81	2	104	212	199	307	2.72e-06	58.9	51.82
GEPS01030296.1|:56-799(+)	VVC87902.1	hypothetical protein C7M84_000483 [Penaeus vannamei]	30.631	111	72	4	112	219	182	290	2.93e-06	58.5	54.05
GEPS01030296.1|:56-799(+)	ROT80774.1	uncharacterized protein LOC113370146 [Ctenocephalides felis]	25.676	148	91	4	104	241	1	139	3.29e-06	56.2	50
GEPS01030296.1|:56-799(+)	XP_026466597.1	uncharacterized protein LOC108910840 isoform X1 [Anoplophora...	29.474	95	65	2	114	207	225	318	1.05e-05	57.4	54.74
GEPS01030296.1|:56-799(+)	XP_018571103.1	uncharacterized protein LOC114248597 [Bombyx mandarina]	25.714	105	76	2	104	207	183	286	4.94e-05	55.5	52.38
GEPS01030296.1|:56-799(+)	XP_028037681.1	uncharacterized protein LOC101746276 [Bombyx mori]	30.851	94	59	3	114	204	209	299	9.29e-05	54.7	56.38
GEPS01030296.1|:56-799(+)	XP_004923025.1	hypothetical protein B5X24_HaOG201556 [Helicoverpa armigera]	30.851	94	59	3	114	204	209	299	9.46e-05	54.7	56.38
GEPS01030296.1|:56-799(+)	PZC87320.1		29.008	131	76	6	114	240	164	281	0.00017	53.5	48.85

## Sheet: Ecy_15kDa
Query accession	Subject accession	Description	% identity	Alignment length	Mismatches	Gap opens	Query start	Query end	Subject start	Subject end	Evalue	bit score	% positives
GEPS01035623.1|:561-1340(-)	XP_018017056.1	PREDICTED: uncharacterized protein LOC108673703 [Hyalella azteca]	58.197	244	101	1	16	259	1	243	2.13e-97	295	75
GEPS01035623.1|:561-1340(-)	XP_018015874.1	PREDICTED: uncharacterized protein LOC108672678 [Hyalella azteca]	60.513	195	76	1	65	259	4	197	1.58e-82	255	76.41
GEPS01035623.1|:561-1340(-)	KAF2359079.1	Pheromone/general odorant binding protein [Trinorchestia longiramus]	61.039	154	60	0	106	259	15	168	1.51e-65	211	78.57
GEPS01035623.1|:561-1340(-)	KAF2359080.1	hypothetical protein FHG87_010162 [Trinorchestia longiramus]	46.617	133	69	1	33	165	56	186	9.41e-36	136	67.67
GEPS01035623.1|:561-1340(-)	KAF2366109.1	hypothetical protein FHG87_003135 [Trinorchestia longiramus]	35.714	168	103	3	95	259	96	261	1.15e-27	117	58.33
GEPS01035623.1|:561-1340(-)	XP_018016985.1	PREDICTED: uncharacterized protein LOC108673639 [Hyalella azteca]	45.926	135	59	1	16	136	1	135	1.6e-27	113	62.96
GEPS01035623.1|:561-1340(-)	XP_018017062.1	PREDICTED: uncharacterized protein LOC108673706 [Hyalella azteca]	30	260	160	7	16	259	1	254	1.14e-25	111	46.54
GEPS01035623.1|:561-1340(-)	KAF2367543.1	hypothetical protein FHG87_001712 [Trinorchestia longiramus]	43.284	134	61	2	16	134	1	134	1.47e-25	107	55.97
GEPS01035623.1|:561-1340(-)	XP_018023722.1	PREDICTED: uncharacterized protein LOC108679580 [Hyalella azteca]	31.169	231	146	5	41	259	25	254	1.59e-25	111	51.08
GEPS01035623.1|:561-1340(-)	KAF2367531.1	hypothetical protein FHG87_001700 [Trinorchestia longiramus]	31.765	255	151	9	24	259	28	278	6.57e-24	107	47.45
GEPS01035623.1|:561-1340(-)	XP_018008854.1	PREDICTED: uncharacterized protein LOC108666479 [Hyalella azteca]	29.515	227	146	5	42	259	26	247	1.86e-23	105	49.78
GEPS01035623.1|:561-1340(-)	XP_027211774.1	uncharacterized protein LOC113805061 [Penaeus vannamei]	22.764	246	153	7	42	258	19	256	5.32e-09	66.6	40.24
GEPS01035623.1|:561-1340(-)	XP_018017053.1	PREDICTED: uncharacterized protein LOC108673699 [Hyalella azteca]	23.288	219	152	6	41	250	28	239	1.61e-08	65.1	47.03
GEPS01035623.1|:561-1340(-)	XP_027211763.1	uncharacterized protein LOC113805051 [Penaeus vannamei]	24.405	168	116	3	96	258	118	279	1.7e-08	65.1	45.83
GEPS01035623.1|:561-1340(-)	ROT80771.1	hypothetical protein C7M84_000480 [Penaeus vannamei]	24.034	233	145	6	42	258	21	237	1.9e-08	64.7	41.2
GEPS01035623.1|:561-1340(-)	XP_018008858.1	PREDICTED: uncharacterized protein LOC108666483 [Hyalella azteca]	21.667	240	177	4	16	251	1	233	2.59e-08	64.3	42.5
GEPS01035623.1|:561-1340(-)	XP_027211854.1	uncharacterized protein LOC113805126 [Penaeus vannamei]	23.009	226	137	6	16	215	1	215	2.97e-08	63.9	40.27
GEPS01035623.1|:561-1340(-)	XP_021934352.1	uncharacterized protein LOC110836930 [Zootermopsis nevadensis]	33.708	89	58	1	128	215	31	119	4.24e-08	62.4	55.06
GEPS01035623.1|:561-1340(-)	XP_018016986.1	PREDICTED: uncharacterized protein LOC108673640 [Hyalella azteca]	30	130	85	4	128	253	18	145	5.52e-08	61.6	52.31
GEPS01035623.1|:561-1340(-)	XP_027231531.1	uncharacterized protein LOC113823112 [Penaeus vannamei]	26.923	104	76	0	112	215	82	185	9.81e-08	62.4	50
GEPS01035623.1|:561-1340(-)	KAF2367532.1	hypothetical protein FHG87_001701 [Trinorchestia longiramus]	21.6	250	177	6	16	247	1	249	1.03e-07	62.8	42.4
GEPS01035623.1|:561-1340(-)	XP_018008817.1	PREDICTED: uncharacterized protein LOC108666451 [Hyalella azteca]	26.891	119	86	1	137	255	148	265	1.04e-07	62.8	52.1
GEPS01035623.1|:561-1340(-)	KAF2366110.1	Pheromone/general odorant binding protein [Trinorchestia longiramus]	22.727	220	158	6	34	247	71	284	1.4e-07	63.5	43.64
GEPS01035623.1|:561-1340(-)	KDR11629.1	hypothetical protein L798_13955 [Zootermopsis nevadensis]	33.708	89	58	1	128	215	215	303	2.55e-07	62.4	55.06
GEPS01035623.1|:561-1340(-)	PNF40311.1	hypothetical protein B7P43_G05789 [Cryptotermes secundus]	32.584	89	59	1	128	215	215	303	2.88e-07	62.4	55.06
GEPS01035623.1|:561-1340(-)	VEN60864.1	unnamed protein product [Callosobruchus maculatus]	28.319	113	80	1	128	239	166	278	3.78e-07	61.6	48.67
GEPS01035623.1|:561-1340(-)	XP_023727809.1	uncharacterized protein LOC111875643 [Cryptotermes secundus]	32.584	89	59	1	128	215	215	303	4.13e-07	61.6	55.06
GEPS01035623.1|:561-1340(-)	XP_027211893.1	uncharacterized protein LOC113805142 [Penaeus vannamei]	23.171	164	122	3	96	258	118	278	4.64e-07	61.2	48.17
GEPS01035623.1|:561-1340(-)	PSN39312.1	hypothetical protein C0J52_15573 [Blattella germanica]	32.584	89	59	1	128	215	153	241	1.06e-06	60.1	53.93
GEPS01035623.1|:561-1340(-)	XP_028145914.1	uncharacterized protein LOC114339451 [Diabrotica virgifera...	28.571	112	79	1	128	238	205	316	2.23e-06	59.7	48.21
GEPS01035623.1|:561-1340(-)	XP_030765405.1	uncharacterized protein LOC115889522 [Sitophilus oryzae]	29.213	89	62	1	128	215	213	301	4.59e-06	58.5	52.81
GEPS01035623.1|:561-1340(-)	KAB7506053.1	hypothetical protein Anas_00172 [Armadillidium nasatum]	23.78	164	122	2	94	254	61	224	7.84e-06	57	42.07
GEPS01035623.1|:561-1340(-)	XP_018917579.1	PREDICTED: uncharacterized protein LOC109044341 [Bemisia tabaci]	31.776	107	63	3	128	233	322	419	8.35e-06	58.2	51.4
GEPS01035623.1|:561-1340(-)	XP_018017061.1	PREDICTED: uncharacterized protein LOC108673705 [Hyalella azteca]	25.899	139	95	3	112	246	58	192	8.5e-06	56.6	46.04
GEPS01035623.1|:561-1340(-)	RXG58341.1	hypothetical protein Avbf_07573 [Armadillidium vulgare]	24.138	174	126	3	84	254	16	186	1.28e-05	55.8	41.95
GEPS01035623.1|:561-1340(-)	XP_025192734.1	uncharacterized protein LOC112592796 isoform X1 [Melanaphis...	29.839	124	79	5	128	249	273	390	1.3e-05	57.4	53.23
GEPS01035623.1|:561-1340(-)	XP_025192746.1	uncharacterized protein LOC112592796 isoform X2 [Melanaphis...	29.839	124	79	5	128	249	272	389	1.31e-05	57.4	53.23
GEPS01035623.1|:561-1340(-)	XP_025408396.1	uncharacterized protein LOC112682116 [Sipha flava]	29.204	113	69	4	128	237	265	369	1.74e-05	57	53.1
GEPS01035623.1|:561-1340(-)	XP_014261933.1	uncharacterized protein LOC106674017 [Cimex lectularius]	29.508	122	79	2	128	243	253	373	1.94e-05	57	50
GEPS01035623.1|:561-1340(-)	XP_019877145.1	PREDICTED: uncharacterized protein LOC109605022 [Aethina tumida]	28.09	89	63	1	128	215	200	288	2.05e-05	56.6	52.81
GEPS01035623.1|:561-1340(-)	XP_026812904.1	uncharacterized protein LOC113553654 isoform X1 [Rhopalosiphum...	31.461	89	58	2	128	215	274	360	2.53e-05	56.6	55.06
GEPS01035623.1|:561-1340(-)	XP_026812905.1	uncharacterized protein LOC113553654 isoform X2 [Rhopalosiphum...	31.461	89	58	2	128	215	273	359	2.77e-05	56.6	55.06
GEPS01035623.1|:561-1340(-)	VVC43406.1	Pheromone/general odorant binding protein [Cinara cedri]	31.461	89	58	2	128	215	279	365	2.9e-05	56.2	55.06
GEPS01035623.1|:561-1340(-)	XP_008193633.1	PREDICTED: uncharacterized protein LOC103313083 isoform X1...	29.213	89	62	1	128	215	196	284	3e-05	56.2	53.93
GEPS01035623.1|:561-1340(-)	XP_026466597.1	uncharacterized protein LOC113370146 [Ctenocephalides felis]	28.571	105	68	3	128	231	228	326	3.05e-05	56.2	52.38
GEPS01035623.1|:561-1340(-)	XP_015366226.1	PREDICTED: uncharacterized protein LOC107163361 isoform X1...	31.461	89	58	2	128	215	274	360	3.19e-05	56.2	55.06
GEPS01035623.1|:561-1340(-)	XP_015366227.1	PREDICTED: uncharacterized protein LOC107163361 isoform X2...	31.461	89	58	2	128	215	273	359	3.24e-05	56.2	55.06
GEPS01035623.1|:561-1340(-)	XP_008193634.1	PREDICTED: uncharacterized protein LOC103313083 isoform X2...	29.213	89	62	1	128	215	192	280	3.4e-05	55.8	53.93
GEPS01035623.1|:561-1340(-)	KAF0765727.1	Uncharacterized protein FWK35_00011987 [Aphis craccivora]	31.461	89	58	2	128	215	275	361	3.44e-05	56.2	55.06
GEPS01035623.1|:561-1340(-)	KAE9544914.1	hypothetical protein AGLY_000457 [Aphis glycines]	31.461	89	58	2	128	215	275	361	3.67e-05	56.2	55.06
GEPS01035623.1|:561-1340(-)	XP_027853063.1	uncharacterized protein LOC114131918 [Aphis gossypii]	31.461	89	58	2	128	215	275	361	3.74e-05	56.2	55.06
GEPS01035623.1|:561-1340(-)	XP_001943087.1	uncharacterized protein LOC100166240 [Acyrthosiphon pisum]	31.461	89	58	2	128	215	224	310	4.04e-05	55.8	55.06
GEPS01035623.1|:561-1340(-)	XP_022164506.1	uncharacterized protein LOC111029697 isoform X1 [Myzus persicae]	31.461	89	58	2	128	215	278	364	4.59e-05	55.8	55.06
GEPS01035623.1|:561-1340(-)	XP_014278127.1	uncharacterized protein LOC106682016 isoform X1 [Halyomorpha...	31.818	110	68	4	128	236	251	354	4.67e-05	55.8	51.82
GEPS01035623.1|:561-1340(-)	XP_014278128.1	uncharacterized protein LOC106682016 isoform X2 [Halyomorpha...	31.818	110	68	4	128	236	250	353	4.8e-05	55.8	51.82
GEPS01035623.1|:561-1340(-)	XP_022164510.1	uncharacterized protein LOC111029697 isoform X2 [Myzus persicae]	31.461	89	58	2	128	215	277	363	5.03e-05	55.8	55.06
GEPS01035623.1|:561-1340(-)	XP_019756139.1	PREDICTED: uncharacterized protein LOC109534792 isoform X2...	26.966	89	64	1	128	215	213	301	7.62e-05	55.1	53.93
GEPS01035623.1|:561-1340(-)	KAF0304043.1	hypothetical protein FJT64_002827 [Amphibalanus amphitrite]	27.586	116	77	2	119	227	131	246	8.89e-05	54.3	47.41
GEPS01035623.1|:561-1340(-)	KAF0304044.1	hypothetical protein FJT64_002827 [Amphibalanus amphitrite]	27.586	116	77	2	119	227	134	249	9.14e-05	54.3	47.41
GEPS01035623.1|:561-1340(-)	XP_019756138.1	PREDICTED: uncharacterized protein LOC109534792 isoform X1...	26.966	89	64	1	128	215	231	319	9.41e-05	54.7	53.93
GEPS01035623.1|:561-1340(-)	MPC24991.1	hypothetical protein [Portunus trituberculatus]	29.348	92	64	1	133	223	10	101	0.000146	53.9	54.35
GEPS01035623.1|:561-1340(-)	XP_018571112.1	uncharacterized protein LOC108910840 isoform X2 [Anoplophora...	28.09	89	63	1	128	215	174	262	0.000378	52.8	52.81
GEPS01035623.1|:561-1340(-)	XP_018571103.1	uncharacterized protein LOC108910840 isoform X1 [Anoplophora...	28.09	89	63	1	128	215	196	284	0.000474	52.4	52.81
GEPS01035623.1|:561-1340(-)	XP_022192171.1	uncharacterized protein LOC111050194 isoform X2 [Nilaparvata...	31.461	89	58	2	128	215	359	445	0.002	50.8	49.44
GEPS01035623.1|:561-1340(-)	RZF48774.1	hypothetical protein LSTR_LSTR008123 [Laodelphax striatellus]	31.461	89	58	2	128	215	341	427	0.002	50.8	49.44
GEPS01035623.1|:561-1340(-)	XP_022192163.1	uncharacterized protein LOC111050194 isoform X1 [Nilaparvata...	31.461	89	58	2	128	215	360	446	0.002	50.8	49.44
GEPS01035623.1|:561-1340(-)	XP_002432927.1	hypothetical protein Phum_PHUM604920 [Pediculus humanus corporis]	21.591	88	69	0	128	215	222	309	0.004	50.1	48.86
GEPS01035623.1|:561-1340(-)	ROT80775.1	hypothetical protein C7M84_000484 [Penaeus vannamei]	27.132	129	82	4	135	258	124	245	0.015	47.8	44.96
GEPS01035623.1|:561-1340(-)	ROT69064.1	hypothetical protein C7M84_012767 [Penaeus vannamei]	24.762	105	79	0	119	223	258	362	0.017	48.1	50.48
GEPS01035623.1|:561-1340(-)	XP_027211786.1	uncharacterized protein LOC113805073 [Penaeus vannamei]	25.41	122	74	4	111	223	25	138	0.023	46.2	48.36
GEPS01035623.1|:561-1340(-)	XP_027223216.1	uncharacterized protein LOC113815322 [Penaeus vannamei]	24.762	105	79	0	119	223	341	445	0.024	47.8	50.48
GEPS01035623.1|:561-1340(-)	KAE8749267.1	hypothetical protein FOCC_FOCC003974 [Frankliniella occidentalis]	25.263	95	70	1	137	230	55	149	0.027	46.2	48.42
GEPS01035623.1|:561-1340(-)	ROT80774.1	hypothetical protein C7M84_000483 [Penaeus vannamei]	25.424	118	71	4	115	223	1	110	0.097	43.9	48.31

## Sheet: Evi_25kDa
Query accession	Subject accession	Description	% identity	Alignment length	Mismatches	Gap opens	Query start	Query end	Subject start	Subject end	Evalue	bit score	% positives
GEPV01033026.1|:385-1125(-)	XP_018017053.1	PREDICTED: uncharacterized protein LOC108673699 [Hyalella azteca]	53.036	247	114	2	1	246	2	247	6.81e-86	265	72.47
GEPV01033026.1|:385-1125(-)	KAF2359082.1	hypothetical protein FHG87_010164 [Trinorchestia longiramus]	48.178	247	126	2	1	246	2	247	1.16e-84	262	70.04
GEPV01033026.1|:385-1125(-)	KAF2354759.1	Pheromone/general odorant binding protein [Trinorchestia longiramus]	52.444	225	106	1	23	246	60	284	1.9e-84	263	71.11
GEPV01033026.1|:385-1125(-)	KAF2359081.1	hypothetical protein FHG87_010163 [Trinorchestia longiramus]	47.773	247	127	2	1	246	2	247	8.39e-84	259	70.04
GEPV01033026.1|:385-1125(-)	XP_018016986.1	PREDICTED: uncharacterized protein LOC108673640 [Hyalella azteca]	62.585	147	55	0	100	246	2	148	3.43e-65	209	82.31
GEPV01033026.1|:385-1125(-)	KAF2366110.1	Pheromone/general odorant binding protein [Trinorchestia longiramus]	35.268	224	131	2	19	235	68	284	4.87e-41	157	56.25
GEPV01033026.1|:385-1125(-)	XP_018023718.1	PREDICTED: uncharacterized protein LOC108679577 [Hyalella azteca]	32.751	229	151	3	9	235	3	230	7.6e-35	134	54.15
GEPV01033026.1|:385-1125(-)	XP_018008858.1	PREDICTED: uncharacterized protein LOC108666483 [Hyalella azteca]	32.035	231	145	4	10	234	4	228	1.91e-30	123	49.78
GEPV01033026.1|:385-1125(-)	KAF2367532.1	hypothetical protein FHG87_001701 [Trinorchestia longiramus]	30.952	252	147	6	2	234	5	248	2.65e-29	120	49.21
GEPV01033026.1|:385-1125(-)	XP_018017061.1	PREDICTED: uncharacterized protein LOC108673705 [Hyalella azteca]	32.821	195	126	3	41	234	2	192	1.2e-28	117	52.82
GEPV01033026.1|:385-1125(-)	XP_018008817.1	PREDICTED: uncharacterized protein LOC108666451 [Hyalella azteca]	26.374	273	160	5	6	244	1	266	1.49e-20	97.8	42.49
GEPV01033026.1|:385-1125(-)	XP_018017056.1	PREDICTED: uncharacterized protein LOC108673703 [Hyalella azteca]	26.923	208	137	5	38	238	35	234	1.23e-15	84.3	49.52
GEPV01033026.1|:385-1125(-)	PSN39312.1	hypothetical protein C0J52_15573 [Blattella germanica]	24.194	248	150	7	26	239	31	274	2.03e-15	84.7	46.37
GEPV01033026.1|:385-1125(-)	XP_018015874.1	PREDICTED: uncharacterized protein LOC108672678 [Hyalella azteca]	27.179	195	127	5	51	238	2	188	1.02e-13	78.2	49.23
GEPV01033026.1|:385-1125(-)	XP_027211774.1	uncharacterized protein LOC113805061 [Penaeus vannamei]	24.436	266	162	9	5	244	1	253	1.33e-12	76.3	42.11
GEPV01033026.1|:385-1125(-)	XP_027211893.1	Pheromone/general odorant binding protein [Trinorchestia longiramus]	30.894	123	79	2	95	215	129	247	4.03e-11	72.4	52.85
GEPV01033026.1|:385-1125(-)	XP_027235628.1	uncharacterized protein LOC113826930 [Penaeus vannamei]	24.771	218	147	5	5	209	1	214	6.92e-11	71.2	44.04
GEPV01033026.1|:385-1125(-)	XP_018017062.1	PREDICTED: uncharacterized protein LOC108673706 [Hyalella azteca]	26	250	166	5	9	244	6	250	1.4e-10	70.5	41.2
GEPV01033026.1|:385-1125(-)	XP_027211854.1	uncharacterized protein LOC113805126 [Penaeus vannamei]	25	228	136	7	5	207	1	218	1.68e-10	70.1	42.54
GEPV01033026.1|:385-1125(-)	XP_027211763.1	uncharacterized protein LOC113805051 [Penaeus vannamei]	24.862	181	125	4	67	240	99	275	2.87e-10	70.1	46.96
GEPV01033026.1|:385-1125(-)	ROT61328.1	hypothetical protein C7M84_020904 [Penaeus vannamei]	24.771	218	147	5	5	209	1	214	5.81e-10	70.1	44.04
GEPV01033026.1|:385-1125(-)	XP_018008854.1	PREDICTED: uncharacterized protein LOC108666479 [Hyalella azteca]	25.551	227	151	8	30	244	23	243	6.1e-10	68.6	45.81
GEPV01033026.1|:385-1125(-)	XP_021934352.1	uncharacterized protein LOC110836930 [Zootermopsis nevadensis]	30.476	105	71	2	103	206	18	121	7.93e-10	67	58.1
GEPV01033026.1|:385-1125(-)	XP_022914468.1	uncharacterized protein LOC111424959 [Onthophagus taurus]	31.429	105	70	2	103	206	193	296	1.02e-09	68.9	58.1
GEPV01033026.1|:385-1125(-)	KAF0304044.1	hypothetical protein FJT64_002827 [Amphibalanus amphitrite]	22.059	272	168	9	5	242	3	264	1.51e-09	67.8	42.28
GEPV01033026.1|:385-1125(-)	XP_023727809.1	uncharacterized protein LOC111875643 [Cryptotermes secundus]	30.476	105	71	2	103	206	202	305	1.97e-09	68.6	59.05
GEPV01033026.1|:385-1125(-)	PNF40311.1	hypothetical protein B7P43_G05789 [Cryptotermes secundus]	30.476	105	71	2	103	206	202	305	2.04e-09	68.2	59.05
GEPV01033026.1|:385-1125(-)	RXG58341.1	hypothetical protein Avbf_07573 [Armadillidium vulgare]	28.169	142	98	2	89	227	30	170	2.15e-09	66.2	47.89
GEPV01033026.1|:385-1125(-)	XP_017777220.1	PREDICTED: uncharacterized protein LOC108563138 [Nicrophorus...	30.476	105	70	2	103	206	227	329	2.15e-09	68.2	57.14
GEPV01033026.1|:385-1125(-)	EFX77118.1	hypothetical protein DAPPUDRAFT_305875 [Daphnia pulex]	35.135	111	66	3	99	206	219	326	2.34e-09	68.2	55.86
GEPV01033026.1|:385-1125(-)	KAF0304043.1	hypothetical protein FJT64_002827 [Amphibalanus amphitrite]	22.14	271	167	9	6	242	1	261	2.44e-09	67.4	42.07
GEPV01033026.1|:385-1125(-)	KDR11629.1	hypothetical protein L798_13955 [Zootermopsis nevadensis]	30.476	105	71	2	103	206	202	305	4.8e-09	67.4	58.1
GEPV01033026.1|:385-1125(-)	XP_027231531.1	uncharacterized protein LOC113823112 [Penaeus vannamei]	33.01	103	68	1	107	209	89	190	5.68e-09	65.5	56.31
GEPV01033026.1|:385-1125(-)	ROT80771.1	hypothetical protein C7M84_000480 [Penaeus vannamei]	26.977	215	132	7	13	215	5	206	5.87e-09	65.9	43.72
GEPV01033026.1|:385-1125(-)	KAB7506053.1	hypothetical protein Anas_00172 [Armadillidium nasatum]	26.897	145	102	2	86	227	65	208	6.94e-09	65.5	48.97
GEPV01033026.1|:385-1125(-)	XP_028145914.1	uncharacterized protein LOC114339451 [Diabrotica virgifera...	26.357	129	93	2	79	206	168	295	1.31e-08	65.9	52.71
GEPV01033026.1|:385-1125(-)	XP_030765405.1	uncharacterized protein LOC115889522 [Sitophilus oryzae]	27.731	119	80	3	100	213	197	314	1.41e-08	65.9	55.46
GEPV01033026.1|:385-1125(-)	VEN60864.1	unnamed protein product [Callosobruchus maculatus]	26.056	142	91	4	90	221	131	268	1.46e-08	65.5	51.41
GEPV01033026.1|:385-1125(-)	RZC32779.1	uncharacterized protein BDFB_007256 [Asbolus verrucosus]	30.476	105	71	2	103	206	178	281	1.57e-08	65.5	58.1
GEPV01033026.1|:385-1125(-)	XP_025192746.1	uncharacterized protein LOC112592796 isoform X2 [Melanaphis...	29.73	111	76	2	103	213	259	367	2.14e-08	65.5	57.66
GEPV01033026.1|:385-1125(-)	XP_025192734.1	uncharacterized protein LOC112592796 isoform X1 [Melanaphis...	29.73	111	76	2	103	213	260	368	2.22e-08	65.5	57.66
GEPV01033026.1|:385-1125(-)	KAF0304042.1	hypothetical protein FJT64_002826 [Amphibalanus amphitrite]	22.305	269	163	9	12	244	5	263	2.5e-08	64.3	41.26
GEPV01033026.1|:385-1125(-)	VVC43406.1	Pheromone/general odorant binding protein [Cinara cedri]	24.706	170	113	4	81	239	246	411	2.76e-08	65.1	48.24
GEPV01033026.1|:385-1125(-)	XP_031344145.1	uncharacterized protein LOC116171435 [Photinus pyralis]	26.22	164	103	4	65	211	145	307	3.17e-08	64.7	45.73
GEPV01033026.1|:385-1125(-)	KAF2359079.1	Pheromone/general odorant binding protein [Trinorchestia longiramus]	27.465	142	97	3	100	238	21	159	3.68e-08	62.4	50.7
GEPV01033026.1|:385-1125(-)	XP_025830589.1	uncharacterized protein LOC108741139 [Agrilus planipennis]	29.524	105	72	2	103	206	186	289	3.7e-08	64.7	60
GEPV01033026.1|:385-1125(-)	XP_015366226.1	PREDICTED: uncharacterized protein LOC107163361 isoform X1...	29.73	111	76	2	103	213	261	369	3.77e-08	64.7	56.76
GEPV01033026.1|:385-1125(-)	XP_015366227.1	PREDICTED: uncharacterized protein LOC107163361 isoform X2...	29.73	111	76	2	103	213	260	368	3.9e-08	64.7	56.76
GEPV01033026.1|:385-1125(-)	XP_001943087.1	uncharacterized protein LOC100166240 [Acyrthosiphon pisum]	29.73	111	76	2	103	213	211	319	3.97e-08	64.7	56.76
GEPV01033026.1|:385-1125(-)	XP_026812904.1	uncharacterized protein LOC113553654 isoform X1 [Rhopalosiphum...	27.143	140	98	3	74	213	234	369	4.25e-08	64.7	52.14
GEPV01033026.1|:385-1125(-)	XP_026812905.1	uncharacterized protein LOC113553654 isoform X2 [Rhopalosiphum...	27.143	140	98	3	74	213	233	368	4.58e-08	64.3	52.14
GEPV01033026.1|:385-1125(-)	KAF0765727.1	Uncharacterized protein FWK35_00011987 [Aphis craccivora]	29.73	111	76	2	103	213	262	370	4.77e-08	64.3	56.76
GEPV01033026.1|:385-1125(-)	XP_027853063.1	uncharacterized protein LOC114131918 [Aphis gossypii]	29.73	111	76	2	103	213	262	370	4.81e-08	64.3	56.76
GEPV01033026.1|:385-1125(-)	KAE9544914.1	hypothetical protein AGLY_000457 [Aphis glycines]	29.73	111	76	2	103	213	262	370	4.91e-08	64.3	56.76
GEPV01033026.1|:385-1125(-)	XP_022122942.1	uncharacterized protein LOC110998550 [Pieris rapae]	28.859	149	88	4	109	246	218	359	5.24e-08	64.3	47.65
GEPV01033026.1|:385-1125(-)	XP_019877145.1	PREDICTED: uncharacterized protein LOC109605022 [Aethina tumida]	28.571	105	73	2	103	206	187	290	5.53e-08	63.9	58.1
GEPV01033026.1|:385-1125(-)	XP_014278128.1	uncharacterized protein LOC106682016 isoform X2 [Halyomorpha...	25.564	133	97	2	74	206	208	338	5.98e-08	63.9	51.13
GEPV01033026.1|:385-1125(-)	XP_014278127.1	uncharacterized protein LOC106682016 isoform X1 [Halyomorpha...	25.564	133	97	2	74	206	209	339	5.99e-08	63.9	51.13
GEPV01033026.1|:385-1125(-)	XP_025408396.1	uncharacterized protein LOC112682116 [Sipha flava]	29.73	111	76	2	103	213	252	360	6.44e-08	63.9	56.76
GEPV01033026.1|:385-1125(-)	XP_018018435.1	PREDICTED: harpin HrpN-like [Hyalella azteca]	25.595	168	115	3	59	220	278	441	7.7e-08	63.9	42.86
GEPV01033026.1|:385-1125(-)	XP_002432927.1	hypothetical protein Phum_PHUM604920 [Pediculus humanus corporis]	30.612	98	67	1	109	206	215	311	7.88e-08	63.5	55.1
GEPV01033026.1|:385-1125(-)	KAF2894058.1	hypothetical protein ILUMI_12119 [Ignelater luminosus]	25.781	128	92	3	81	206	118	244	8.4e-08	63.2	54.69
GEPV01033026.1|:385-1125(-)	XP_022164510.1	uncharacterized protein LOC111029697 isoform X2 [Myzus persicae]	28.829	111	77	2	103	213	264	372	8.47e-08	63.5	56.76
GEPV01033026.1|:385-1125(-)	XP_022164506.1	uncharacterized protein LOC111029697 isoform X1 [Myzus persicae]	28.829	111	77	2	103	213	265	373	8.89e-08	63.5	56.76
GEPV01033026.1|:385-1125(-)	XP_018917579.1	PREDICTED: uncharacterized protein LOC109044341 [Bemisia tabaci]	26.49	151	101	3	78	220	284	432	1.02e-07	63.5	50.33
GEPV01033026.1|:385-1125(-)	XP_027211786.1	uncharacterized protein LOC113805073 [Penaeus vannamei]	24.599	187	102	6	67	240	7	167	1.49e-07	60.8	45.99
GEPV01033026.1|:385-1125(-)	XP_026748428.1	uncharacterized protein LOC113509309 [Galleria mellonella]	28.283	99	69	2	109	206	17	114	2.89e-07	58.9	54.55
GEPV01033026.1|:385-1125(-)	XP_014261933.1	uncharacterized protein LOC106674017 [Cimex lectularius]	28.846	104	72	2	103	206	240	341	3.02e-07	62	55.77
GEPV01033026.1|:385-1125(-)	XP_013168154.1	PREDICTED: uncharacterized protein LOC106118142 [Papilio xuthus]	27.273	143	98	4	109	246	239	380	3.03e-07	62	51.05
GEPV01033026.1|:385-1125(-)	XP_011560046.1	PREDICTED: uncharacterized protein LOC105390439 [Plutella...	29.293	99	68	2	109	206	230	327	3.26e-07	62	56.57
GEPV01033026.1|:385-1125(-)	GBP26111.1	hypothetical protein EVAR_15125_1 [Eumeta japonica]	32.632	95	62	2	113	206	273	366	3.98e-07	61.6	56.84
GEPV01033026.1|:385-1125(-)	XP_014354759.1	PREDICTED: uncharacterized protein LOC106707832 isoform X1...	27.273	143	98	4	109	246	239	380	5.11e-07	61.2	50.35
GEPV01033026.1|:385-1125(-)	XP_014354760.1	PREDICTED: uncharacterized protein LOC106707832 isoform X2...	30.303	99	67	2	109	206	239	336	5.89e-07	61.2	55.56
GEPV01033026.1|:385-1125(-)	RZF48774.1	hypothetical protein LSTR_LSTR008123 [Laodelphax striatellus]	29.808	104	71	2	103	206	328	429	7.04e-07	61.2	55.77
GEPV01033026.1|:385-1125(-)	TRY62675.1	hypothetical protein TCAL_12792 [Tigriopus californicus]	30.275	109	66	3	103	206	198	301	8.01e-07	60.8	55.05
GEPV01033026.1|:385-1125(-)	XP_032516294.1	uncharacterized protein LOC116769333 isoform X1 [Danaus...	30.303	99	67	2	109	206	220	317	1.04e-06	60.5	55.56
GEPV01033026.1|:385-1125(-)	ROT80774.1	hypothetical protein C7M84_000483 [Penaeus vannamei]	27.152	151	85	5	103	240	1	139	1.08e-06	57.8	48.34
GEPV01033026.1|:385-1125(-)	XP_032516302.1	uncharacterized protein LOC116769333 isoform X2 [Danaus...	30.303	99	67	2	109	206	220	317	1.09e-06	60.5	55.56
GEPV01033026.1|:385-1125(-)	XP_032796909.1	uncharacterized protein LOC116933170 [Daphnia magna]	34.653	101	60	3	109	206	261	358	1.12e-06	60.5	52.48
GEPV01033026.1|:385-1125(-)	XP_013198945.1	PREDICTED: uncharacterized protein LOC106141854 [Amyelois...	29.293	99	68	2	109	206	92	189	1.19e-06	59.3	54.55
GEPV01033026.1|:385-1125(-)	KZS15702.1	Uncharacterized protein APZ42_018912 [Daphnia magna]	34.653	101	60	3	109	206	237	334	1.44e-06	60.1	52.48
GEPV01033026.1|:385-1125(-)	XP_008193634.1	PREDICTED: uncharacterized protein LOC103313083 isoform X2...	29.524	105	72	2	103	206	179	282	1.46e-06	59.7	54.29
GEPV01033026.1|:385-1125(-)	XP_008193633.1	PREDICTED: uncharacterized protein LOC103313083 isoform X1...	29.524	105	72	2	103	206	183	286	1.51e-06	59.7	54.29
GEPV01033026.1|:385-1125(-)	XP_032777940.1	uncharacterized protein LOC116916719 [Daphnia magna]	34.653	101	60	3	109	206	237	334	1.57e-06	59.7	52.48
GEPV01033026.1|:385-1125(-)	RVE47032.1	hypothetical protein evm_008314 [Chilo suppressalis]	29.293	99	68	2	109	206	219	316	1.59e-06	59.7	56.57
GEPV01033026.1|:385-1125(-)	XP_019756138.1	PREDICTED: uncharacterized protein LOC109534792 isoform X1...	24.59	122	85	3	100	215	215	335	1.93e-06	59.7	53.28
GEPV01033026.1|:385-1125(-)	XP_019756139.1	PREDICTED: uncharacterized protein LOC109534792 isoform X2...	24.59	122	85	3	100	215	197	317	2.07e-06	59.3	53.28
GEPV01033026.1|:385-1125(-)	XP_026323502.1	uncharacterized protein LOC113232860 [Hyposmocoma kahamanoa]	28.319	113	78	3	110	220	226	337	2.62e-06	59.3	55.75
GEPV01033026.1|:385-1125(-)	XP_018571103.1	uncharacterized protein LOC108910840 isoform X1 [Anoplophora...	25.954	131	88	4	78	206	163	286	3.58e-06	58.5	51.15
GEPV01033026.1|:385-1125(-)	XP_023934395.1	uncharacterized protein LOC112043295 [Bicyclus anynana]	27.132	129	89	4	96	220	217	344	3.75e-06	58.9	52.71
GEPV01033026.1|:385-1125(-)	XP_026484733.1	uncharacterized protein LOC113392487 [Vanessa tameamea]	28.283	99	69	2	109	206	217	314	3.81e-06	58.5	55.56
GEPV01033026.1|:385-1125(-)	XP_018571112.1	uncharacterized protein LOC108910840 isoform X2 [Anoplophora...	25.954	131	88	4	78	206	141	264	3.92e-06	58.5	51.15
GEPV01033026.1|:385-1125(-)	XP_022192163.1	uncharacterized protein LOC111050194 isoform X1 [Nilaparvata...	28.846	104	72	2	103	206	347	448	4.38e-06	58.9	55.77
GEPV01033026.1|:385-1125(-)	XP_022192171.1	uncharacterized protein LOC111050194 isoform X2 [Nilaparvata...	28.846	104	72	2	103	206	346	447	4.42e-06	58.9	55.77
GEPV01033026.1|:385-1125(-)	XP_028174789.1	uncharacterized protein LOC114363305 isoform X1 [Ostrinia...	27.551	98	69	2	110	206	221	317	8.67e-06	57.8	56.12
GEPV01033026.1|:385-1125(-)	XP_028174791.1	uncharacterized protein LOC114363305 isoform X2 [Ostrinia...	27.551	98	69	2	110	206	221	317	9.2e-06	57.8	56.12
GEPV01033026.1|:385-1125(-)	XP_026466597.1	uncharacterized protein LOC113370146 [Ctenocephalides felis]	28.421	95	66	2	113	206	225	318	4.49e-05	55.5	55.79
GEPV01033026.1|:385-1125(-)	XP_027223214.1	uncharacterized protein LOC113815320 [Penaeus vannamei]	24.352	193	109	5	8	169	2	188	5.2e-05	54.7	41.45
GEPV01033026.1|:385-1125(-)	VVC87902.1	unnamed protein product [Leptidea sinapis]	27.835	97	68	2	111	206	182	277	8.9e-05	54.3	54.64
GEPV01033026.1|:385-1125(-)	PCG80889.1	hypothetical protein B5V51_658 [Heliothis virescens]	29.231	130	77	5	113	239	227	344	0.0001	54.3	51.54

## Sheet: Evi_15kDa
Query accession	Subject accession	Description	% identity	Alignment length	Mismatches	Gap opens	Query start	Query end	Subject start	Subject end	Evalue	bit score	% positives
GEPV01033441.1|:40-798(-)	XP_018017056.1	PREDICTED: uncharacterized protein LOC108673703 [Hyalella azteca]	55.967	243	100	1	17	252	1	243	5.28e-93	283	74.07
GEPV01033441.1|:40-798(-)	XP_018015874.1	PREDICTED: uncharacterized protein LOC108672678 [Hyalella azteca]	57.732	194	75	1	66	252	4	197	4.75e-78	243	75.26
GEPV01033441.1|:40-798(-)	KAF2359079.1	Pheromone/general odorant binding protein [Trinorchestia longiramus]	59.877	162	63	1	91	252	9	168	4.84e-67	214	78.4
GEPV01033441.1|:40-798(-)	KAF2359080.1	hypothetical protein FHG87_010162 [Trinorchestia longiramus]	46.923	130	59	2	34	157	56	181	2.07e-31	125	65.38
GEPV01033441.1|:40-798(-)	KAF2366109.1	hypothetical protein FHG87_003135 [Trinorchestia longiramus]	29.88	251	157	7	20	252	12	261	2.37e-29	121	50.2
GEPV01033441.1|:40-798(-)	XP_018023722.1	PREDICTED: uncharacterized protein LOC108679580 [Hyalella azteca]	30.87	230	140	4	42	252	25	254	6.91e-28	117	50.43
GEPV01033441.1|:40-798(-)	XP_018017062.1	PREDICTED: uncharacterized protein LOC108673706 [Hyalella azteca]	31.441	229	139	5	42	252	26	254	1.2e-27	116	47.16
GEPV01033441.1|:40-798(-)	KAF2367531.1	hypothetical protein FHG87_001700 [Trinorchestia longiramus]	32.271	251	147	9	25	252	28	278	8.43e-26	112	49
GEPV01033441.1|:40-798(-)	KAF2367543.1	hypothetical protein FHG87_001712 [Trinorchestia longiramus]	40.299	134	57	1	17	127	1	134	2.17e-25	107	55.22
GEPV01033441.1|:40-798(-)	XP_018008854.1	PREDICTED: uncharacterized protein LOC108666479 [Hyalella azteca]	34.437	151	96	2	105	252	97	247	9.02e-23	103	56.95
GEPV01033441.1|:40-798(-)	XP_018016985.1	PREDICTED: uncharacterized protein LOC108673639 [Hyalella azteca]	42.222	135	56	1	17	129	1	135	1.08e-22	100	58.52
GEPV01033441.1|:40-798(-)	XP_018008817.1	PREDICTED: uncharacterized protein LOC108666451 [Hyalella azteca]	22.963	270	160	7	19	247	2	264	2.58e-11	72.8	41.85
GEPV01033441.1|:40-798(-)	XP_018017053.1	PREDICTED: uncharacterized protein LOC108673699 [Hyalella azteca]	24.186	215	147	6	42	243	28	239	1.74e-10	70.5	49.3
GEPV01033441.1|:40-798(-)	XP_018016986.1	PREDICTED: uncharacterized protein LOC108673640 [Hyalella azteca]	32.061	131	81	4	121	246	18	145	1.88e-10	68.2	54.96
GEPV01033441.1|:40-798(-)	XP_021934352.1	uncharacterized protein LOC110836930 [Zootermopsis nevadensis]	35.955	89	56	1	121	208	31	119	7.38e-10	67	55.06
GEPV01033441.1|:40-798(-)	KAF2366110.1	Pheromone/general odorant binding protein [Trinorchestia longiramus]	23.256	215	155	5	35	240	71	284	1.91e-09	68.9	45.58
GEPV01033441.1|:40-798(-)	ROT80771.1	hypothetical protein C7M84_000480 [Penaeus vannamei]	24.242	231	139	6	43	251	21	237	2.15e-09	67	42.42
GEPV01033441.1|:40-798(-)	KAF2359082.1	hypothetical protein FHG87_010164 [Trinorchestia longiramus]	25.701	214	145	6	42	243	28	239	3.14e-09	67	47.2
GEPV01033441.1|:40-798(-)	PNF40311.1	hypothetical protein B7P43_G05789 [Cryptotermes secundus]	37.079	89	55	1	121	208	215	303	3.43e-09	67.8	55.06
GEPV01033441.1|:40-798(-)	XP_023727809.1	uncharacterized protein LOC111875643 [Cryptotermes secundus]	37.079	89	55	1	121	208	215	303	4.26e-09	67.4	55.06
GEPV01033441.1|:40-798(-)	KAF2359081.1	hypothetical protein FHG87_010163 [Trinorchestia longiramus]	25.49	204	139	5	51	243	38	239	5.61e-09	66.2	46.57
GEPV01033441.1|:40-798(-)	XP_018008858.1	PREDICTED: uncharacterized protein LOC108666483 [Hyalella azteca]	22.881	236	169	5	17	243	1	232	5.85e-09	65.9	43.22
GEPV01033441.1|:40-798(-)	KDR11629.1	hypothetical protein L798_13955 [Zootermopsis nevadensis]	35.955	89	56	1	121	208	215	303	6.11e-09	67	55.06
GEPV01033441.1|:40-798(-)	PSN39312.1	hypothetical protein C0J52_15573 [Blattella germanica]	25.121	207	114	4	43	208	35	241	8.71e-09	66.2	39.61
GEPV01033441.1|:40-798(-)	XP_027231531.1	uncharacterized protein LOC113823112 [Penaeus vannamei]	29.808	104	73	0	105	208	82	185	2.69e-08	63.9	50.96
GEPV01033441.1|:40-798(-)	XP_027211893.1	uncharacterized protein LOC113805142 [Penaeus vannamei]	24.845	161	116	4	92	251	122	278	7.81e-08	63.2	49.69
GEPV01033441.1|:40-798(-)	XP_018917579.1	PREDICTED: uncharacterized protein LOC109044341 [Bemisia tabaci]	33.645	107	61	4	121	226	322	419	1.71e-07	63.2	53.27
GEPV01033441.1|:40-798(-)	KAB7506053.1	hypothetical protein Anas_00172 [Armadillidium nasatum]	28.462	130	90	2	121	247	95	224	2.03e-07	61.6	47.69
GEPV01033441.1|:40-798(-)	RXG58341.1	hypothetical protein Avbf_07573 [Armadillidium vulgare]	24.561	171	121	3	85	247	16	186	2.26e-07	60.8	44.44
GEPV01033441.1|:40-798(-)	XP_025408396.1	uncharacterized protein LOC112682116 [Sipha flava]	32.99	97	60	3	121	214	265	359	3.28e-07	62	54.64
GEPV01033441.1|:40-798(-)	XP_026812904.1	uncharacterized protein LOC113553654 isoform X1 [Rhopalosiphum...	32.99	97	60	3	121	214	274	368	3.72e-07	62	54.64
GEPV01033441.1|:40-798(-)	XP_026812905.1	uncharacterized protein LOC113553654 isoform X2 [Rhopalosiphum...	32.99	97	60	3	121	214	273	367	3.86e-07	62	54.64
GEPV01033441.1|:40-798(-)	VVC43406.1	Pheromone/general odorant binding protein [Cinara cedri]	32.99	97	60	3	121	214	279	373	3.93e-07	62	54.64
GEPV01033441.1|:40-798(-)	KAF0765727.1	Uncharacterized protein FWK35_00011987 [Aphis craccivora]	32.99	97	60	3	121	214	275	369	4.17e-07	61.6	54.64
GEPV01033441.1|:40-798(-)	XP_027853063.1	uncharacterized protein LOC114131918 [Aphis gossypii]	32.99	97	60	3	121	214	275	369	4.25e-07	61.6	54.64
GEPV01033441.1|:40-798(-)	KAE9544914.1	hypothetical protein AGLY_000457 [Aphis glycines]	32.99	97	60	3	121	214	275	369	4.29e-07	61.6	54.64
GEPV01033441.1|:40-798(-)	XP_001943087.1	uncharacterized protein LOC100166240 [Acyrthosiphon pisum]	32.99	97	60	3	121	214	224	318	4.65e-07	61.6	54.64
GEPV01033441.1|:40-798(-)	XP_022164510.1	uncharacterized protein LOC111029697 isoform X2 [Myzus persicae]	32.99	97	60	3	121	214	277	371	5.69e-07	61.2	54.64
GEPV01033441.1|:40-798(-)	XP_015366227.1	PREDICTED: uncharacterized protein LOC107163361 isoform X2...	32.99	97	60	3	121	214	273	367	6.14e-07	61.2	54.64
GEPV01033441.1|:40-798(-)	XP_022164506.1	uncharacterized protein LOC111029697 isoform X1 [Myzus persicae]	32.99	97	60	3	121	214	278	372	6.25e-07	61.2	54.64
GEPV01033441.1|:40-798(-)	XP_015366226.1	PREDICTED: uncharacterized protein LOC107163361 isoform X1...	32.99	97	60	3	121	214	274	368	6.57e-07	61.2	54.64
GEPV01033441.1|:40-798(-)	XP_030765405.1	uncharacterized protein LOC115889522 [Sitophilus oryzae]	31.461	89	60	1	121	208	213	301	8.98e-07	60.5	52.81
GEPV01033441.1|:40-798(-)	XP_025192734.1	uncharacterized protein LOC112592796 isoform X1 [Melanaphis...	32.99	97	60	3	121	214	273	367	1.05e-06	60.5	54.64
GEPV01033441.1|:40-798(-)	XP_025192746.1	uncharacterized protein LOC112592796 isoform X2 [Melanaphis...	32.99	97	60	3	121	214	272	366	1.09e-06	60.5	54.64
GEPV01033441.1|:40-798(-)	XP_028145914.1	uncharacterized protein LOC114339451 [Diabrotica virgifera...	31.461	89	60	1	121	208	205	293	1.68e-06	59.7	51.69
GEPV01033441.1|:40-798(-)	VEN60864.1	unnamed protein product [Callosobruchus maculatus]	29.213	89	62	1	121	208	166	254	2.43e-06	59.3	52.81
GEPV01033441.1|:40-798(-)	XP_018017061.1	PREDICTED: uncharacterized protein LOC108673705 [Hyalella azteca]	22.917	192	141	3	54	239	2	192	2.49e-06	58.2	40.62
GEPV01033441.1|:40-798(-)	XP_014278127.1	uncharacterized protein LOC106682016 isoform X1 [Halyomorpha...	34.831	89	55	2	121	208	251	337	3.05e-06	59.3	52.81
GEPV01033441.1|:40-798(-)	XP_014278128.1	uncharacterized protein LOC106682016 isoform X2 [Halyomorpha...	34.831	89	55	2	121	208	250	336	3.19e-06	58.9	52.81
GEPV01033441.1|:40-798(-)	XP_008193633.1	PREDICTED: uncharacterized protein LOC103313083 isoform X1...	31.461	89	60	1	121	208	196	284	4.82e-06	58.5	53.93
GEPV01033441.1|:40-798(-)	XP_019877145.1	PREDICTED: uncharacterized protein LOC109605022 [Aethina tumida]	30.337	89	61	1	121	208	200	288	5.29e-06	58.2	52.81
GEPV01033441.1|:40-798(-)	XP_008193634.1	PREDICTED: uncharacterized protein LOC103313083 isoform X2...	31.461	89	60	1	121	208	192	280	5.42e-06	58.2	53.93
GEPV01033441.1|:40-798(-)	XP_018571112.1	uncharacterized protein LOC108910840 isoform X2 [Anoplophora...	26.316	133	96	2	77	208	131	262	5.69e-06	58.2	47.37
GEPV01033441.1|:40-798(-)	KAF2367532.1	hypothetical protein FHG87_001701 [Trinorchestia longiramus]	25.62	121	88	2	121	240	130	249	6.24e-06	57.4	47.11
GEPV01033441.1|:40-798(-)	XP_018571103.1	uncharacterized protein LOC108910840 isoform X1 [Anoplophora...	26.316	133	96	2	77	208	153	284	6.25e-06	58.2	47.37
GEPV01033441.1|:40-798(-)	XP_014261933.1	uncharacterized protein LOC106674017 [Cimex lectularius]	34.091	88	57	1	121	208	253	339	7.54e-06	58.2	53.41
GEPV01033441.1|:40-798(-)	XP_019756139.1	PREDICTED: uncharacterized protein LOC109534792 isoform X2...	28.972	107	72	2	121	223	213	319	9.53e-06	57.8	51.4
GEPV01033441.1|:40-798(-)	XP_019756138.1	PREDICTED: uncharacterized protein LOC109534792 isoform X1...	28.972	107	72	2	121	223	231	337	1.09e-05	57.4	51.4
GEPV01033441.1|:40-798(-)	MPC24991.1	hypothetical protein [Portunus trituberculatus]	30.435	92	63	1	126	216	10	101	5.35e-05	55.1	55.43
GEPV01033441.1|:40-798(-)	KAF0304043.1	hypothetical protein FJT64_002827 [Amphibalanus amphitrite]	31.193	109	71	3	121	225	140	248	0.000172	53.5	50.46
GEPV01033441.1|:40-798(-)	KAF0304044.1	hypothetical protein FJT64_002827 [Amphibalanus amphitrite]	31.193	109	71	3	121	225	143	251	0.000182	53.1	50.46
GEPV01033441.1|:40-798(-)	RZF48774.1	hypothetical protein LSTR_LSTR008123 [Laodelphax striatellus]	33.708	89	56	2	121	208	341	427	0.000216	53.9	49.44
GEPV01033441.1|:40-798(-)	XP_022192171.1	uncharacterized protein LOC111050194 isoform X2 [Nilaparvata...	33.708	89	56	2	121	208	359	445	0.000217	53.9	49.44
GEPV01033441.1|:40-798(-)	XP_022192163.1	uncharacterized protein LOC111050194 isoform X1 [Nilaparvata...	33.708	89	56	2	121	208	360	446	0.00022	53.9	49.44
GEPV01033441.1|:40-798(-)	KAE8749267.1	hypothetical protein FOCC_FOCC003974 [Frankliniella occidentalis]	27.368	95	68	1	130	223	55	149	0.001	50.1	49.47
GEPV01033441.1|:40-798(-)	XP_027223216.1	uncharacterized protein LOC113815322 [Penaeus vannamei]	28.125	128	77	5	119	239	348	467	0.002	50.8	50.78
GEPV01033441.1|:40-798(-)	XP_002432927.1	hypothetical protein Phum_PHUM604920 [Pediculus humanus corporis]	22.727	88	68	0	121	208	222	309	0.002	50.8	48.86
GEPV01033441.1|:40-798(-)	ROT69064.1	hypothetical protein C7M84_012767 [Penaeus vannamei]	28.125	128	77	5	119	239	265	384	0.002	50.8	50.78
GEPV01033441.1|:40-798(-)	XP_027211786.1	uncharacterized protein LOC113805073 [Penaeus vannamei]	22.905	179	126	5	77	251	1	171	0.003	48.5	45.25
GEPV01033441.1|:40-798(-)	ROT80774.1	hypothetical protein C7M84_000483 [Penaeus vannamei]	23.649	148	104	4	108	251	1	143	0.069	44.3	47.97
GEPV01033441.1|:40-798(-)	RXG56264.1	hypothetical protein Avbf_14481 [Armadillidium vulgare]	23.958	96	73	0	121	216	66	161	0.37	43.1	52.08
GEPV01033441.1|:40-798(-)	XP_032516390.1	uncharacterized protein LOC116769417 [Danaus plexippus plexippus]	22.807	114	78	3	54	165	24	129	4.9	39.7	47.37
GEPV01033441.1|:40-798(-)	XP_027211903.1	uncharacterized protein LOC113805152 [Penaeus vannamei]	22.857	105	78	1	80	184	102	203	5.1	39.7	44.76
GEPV01033441.1|:40-798(-)	XP_018008818.1	PREDICTED: uncharacterized protein LOC108666452 [Hyalella azteca]	26.786	56	41	0	119	174	128	183	5.6	39.3	60.71
GEPV01033441.1|:40-798(-)	XP_032833646.1	rho guanine nucleotide exchange factor 7-like isoform X5...	31.034	87	56	2	84	166	96	182	6.7	40	50.57
GEPV01033441.1|:40-798(-)	XP_032833643.1	rho guanine nucleotide exchange factor 7-like isoform X2...	29.268	123	67	4	81	199	228	334	6.7	40	44.72
GEPV01033441.1|:40-798(-)	XP_032833641.1	rho guanine nucleotide exchange factor 7-like isoform X1...	29.268	123	67	4	81	199	232	338	6.7	40	44.72
GEPV01033441.1|:40-798(-)	XP_032833645.1	rho guanine nucleotide exchange factor 7-like isoform X4...	29.268	123	67	4	81	199	178	284	7.6	40	44.72
GEPV01033441.1|:40-798(-)	OWR44653.1	hypothetical protein KGM_202590 [Danaus plexippus plexippus]	28.125	64	45	1	103	165	8	71	7.7	38.1	57.81
